# Supplementary material
Source: publisher site journal article supplement (https://www.spandidos-publications.com/1338/downloadSupplementary)
Supplement: Supplementary file 1 [file downloadSupplementary]

## Sheet: Table S4
Table SIV. Lung squamous cell carcinoma-specific differentially methylated probes analysis.
CpGs	logFC	AveExpr	t	P.Value	adj.P.Val	B	C_AVG	T_AVG	deltaBeta	CHR	MAPINFO	Strand	Type	gene	feature	cgi	feat.cgi	UCSC_CpG_Islands_Name	DHS	Enhancer	Phantom	Probe_SNPs	Probe_SNPs_10
cg16732616	-0.562437	0.313055	-61.7849	1.09945e-68	4.42385e-63	144.105	0.594273	0.0318363	-0.562437	1	50886782	R	I	DMRTA2	Body	island	Body-island	chr1:50884228-50891471	NA	NA
cg26521404	-0.527901	0.331069	-48.9698	6.61448e-61	1.33073e-55	127.517	0.59502	0.067119	-0.527901	7	27204981	F	I	HOXA9	1stExon	island	1stExon-island	chr7:27203915-27206462	NA	NA		rs11975265
cg01381846	-0.601446	0.542837	-46.7702	2.22058e-59	2.97831e-54	124.194	0.84356	0.242114	-0.601446	7	27204785	F	II	HOXA9	1stExon	island	1stExon-island	chr7:27203915-27206462	NA	NA
cg25191628	-0.463287	0.282822	-40.7201	8.22555e-55	8.27426e-50	114.142	0.514465	0.0511785	-0.463287	1	50886949	R	I	DMRTA2	Body	island	Body-island	chr1:50884228-50891471	NA	NA
cg09624466	-0.618349	0.526758	-39.921	3.66847e-54	2.78877e-49	112.702	0.835933	0.217584	-0.618349	14	57278710	R	II	OTX2OS1	TSS1500	island	TSS1500-island	chr14:57278709-57279116	NA	NA
cg10364040	-0.579527	0.40073	-39.2598	1.29056e-53	7.23123e-49	111.489	0.690494	0.110967	-0.579527	2	176981064	F	I	HOXD10	TSS1500	island	TSS1500-island	chr2:176980765-176981423	TRUE	NA
cg12756396	-0.417751	0.337536	-39.2035	1.43773e-53	7.23123e-49	111.384	0.546411	0.128661	-0.417751	1	50886969	R	I	DMRTA2	Body	island	Body-island	chr1:50884228-50891471	NA	NA
cg16768018	-0.527432	0.393306	-39.1084	1.72607e-53	7.71685e-49	111.208	0.657022	0.129589	-0.527432	3	147108843	R	I	ZIC4	Body	island	Body-island	chr3:147108511-147111703	NA	NA
cg23767994	-0.473887	0.627728	-38.2858	8.52741e-53	3.11924e-48	109.664	0.864672	0.390785	-0.473887	7	96621323	F	II	DLX6AS	Body	opensea	Body-opensea		NA	NA		rs35510195
cg03964958	-0.433615	0.342273	-38.1708	1.06869e-52	3.58339e-48	109.445	0.55908	0.125465	-0.433615	2	176964720	F	I	HOXD12	1stExon	island	1stExon-island	chr2:176964062-176965509	NA	NA
cg25774643	-0.583726	0.417178	-36.4918	3.10108e-51	8.91271e-47	106.18	0.709042	0.125315	-0.583726	11	627175	R	I	SCT	TSS200	island	TSS200-island	chr11:626728-628037	NA	NA
cg02483701	-0.317798	0.726243	-35.8445	1.1788e-50	2.79008e-46	104.883	0.885142	0.567344	-0.317798	7	27215610	R	II	HOXA10	Body	shore	Body-shore	chr7:27212416-27214396	NA	NA
cg21039708	-0.631514	0.453566	-35.5404	2.22372e-50	4.97087e-46	104.265	0.769323	0.137808	-0.631514	14	57278729	R	I	OTX2OS1	TSS1500	island	TSS1500-island	chr14:57278709-57279116	NA	NA
cg14823851	-0.333384	0.397788	-35.3322	3.44341e-50	7.29223e-46	103.84	0.56448	0.231096	-0.333384	17	59532306	R	I	TBX4	TSS1500	island	TSS1500-island	chr17:59531723-59535254	NA	NA
cg09803262	-0.599672	0.506307	-35.2731	3.90001e-50	7.84621e-46	103.718	0.806144	0.206471	-0.599672	7	96622608	R	II	DLX6AS	Body	opensea	Body-opensea		NA	TRUE
cg12595013	-0.446479	0.356864	-35.0405	6.38006e-50	1.22245e-45	103.239	0.580104	0.133625	-0.446479	3	147128123	F	I	ZIC1	1stExon	island	1stExon-island	chr3:147126988-147128999	TRUE	TRUE	high-CpG:148610539-148610905
cg18502142	-0.589311	0.469377	-34.4701	2.15858e-49	3.94793e-45	102.051	0.764033	0.174722	-0.589311	7	96622709	F	I	DLX6AS	Body	opensea	Body-opensea		NA	TRUE		rs2240293
cg27157482	-0.330462	0.733927	-34.1656	4.16752e-49	7.29079e-45	101.41	0.899158	0.568696	-0.330462	7	27215606	R	II	HOXA10	Body	shore	Body-shore	chr7:27212416-27214396	NA	NA
cg10659805	-0.511274	0.390381	-34.1419	4.38768e-49	7.35611e-45	101.36	0.646018	0.134744	-0.511274	7	96631680	F	I	DLX6AS	Body	island	Body-island	chr7:96631383-96631800	NA	NA		rs74570108
cg16443812	-0.502732	0.317793	-34.1125	4.6765e-49	7.52671e-45	101.297	0.569159	0.0664267	-0.502732	22	50987294	R	II	KLHDC7B	1stExon	island	1stExon-island	chr22:50984972-50988141	NA	NA			rs5770886
cg14754787	-0.491733	0.415024	-33.4352	2.06296e-48	3.19257e-44	99.8483	0.66089	0.169157	-0.491733	17	35299600	F	I	LHX1	Body	island	Body-island	chr17:35291899-35300875	NA	NA
cg22399133	-0.622424	0.384365	-33.3238	2.63944e-48	3.93344e-44	99.6075	0.695578	0.0731533	-0.622424	2	208989248	R	I	CRYGD	1stExon	island	1stExon-island	chr2:208988834-208989269	NA	NA
cg26476852	-0.488414	0.360163	-33.252	3.09577e-48	4.44872e-44	99.4517	0.60437	0.115955	-0.488414	7	27204728	R	I	HOXA9	1stExon	island	1stExon-island	chr7:27203915-27206462	TRUE	NA
cg27009703	-0.37297	0.446382	-33.2177	3.34081e-48	4.6353e-44	99.3772	0.632867	0.259897	-0.37297	7	27204894	F	I	HOXA9	1stExon	island	1stExon-island	chr7:27203915-27206462	NA	NA
cg12215739	-0.486645	0.564927	-33.1188	4.16287e-48	5.40326e-44	99.1622	0.808249	0.321605	-0.486645	2	177014966	R	II	HOXD4	TSS1500	island	TSS1500-island	chr2:177014948-177015214	NA	NA
cg00298065	-0.31692	0.750679	-32.2966	2.65413e-47	3.141e-43	97.3499	0.909139	0.592219	-0.31692	19	58715577	R	II	ZNF274	Body	island	Body-island	chr19:58715220-58716033	NA	NA
cg01602690	-0.345727	0.315079	-31.96	5.73265e-47	6.5904e-43	96.5958	0.487942	0.142215	-0.345727	2	176987161	F	I	HOXD9	TSS1500	island	TSS1500-island	chr2:176986424-176988291	TRUE	TRUE			rs73033728
cg13080379	-0.462822	0.431926	-31.7783	8.71287e-47	9.7092e-43	96.1857	0.663336	0.200515	-0.462822	1	119527156	R	II	TBX15	5'UTR	island	5'UTR-island	chr1:119526782-119527192	TRUE	NA
cg01354473	-0.422643	0.505123	-31.7678	8.92814e-47	9.7092e-43	96.1617	0.716444	0.293801	-0.422643	7	27204803	F	II	HOXA9	1stExon	island	1stExon-island	chr7:27203915-27206462	NA	NA
cg22833612	-0.560462	0.508319	-31.6882	1.07326e-46	1.10763e-42	95.9814	0.78855	0.228088	-0.560462	2	9487886	R	II	ASAP2	Body	opensea	Body-opensea		NA	TRUE			rs73915714
cg03536885	-0.40178	0.651294	-31.6881	1.07358e-46	1.10763e-42	95.9811	0.852184	0.450404	-0.40178	7	27163820	R	II	HOXA3	5'UTR	island	5'UTR-island	chr7:27163819-27164098	NA	TRUE
cg21774338	-0.495214	0.510908	-31.4114	2.04171e-46	2.05381e-42	95.3509	0.758515	0.2633	-0.495214	1	50884242	R	II	DMRTA2	3'UTR	island	3'UTR-island	chr1:50884228-50891471	NA	NA		rs1296714
cg05371578	-0.436548	0.576521	-31.344	2.38994e-46	2.34546e-42	95.1965	0.794795	0.358247	-0.436548	3	147128157	F	II	ZIC1	1stExon	island	1stExon-island	chr3:147126988-147128999	NA	TRUE	high-CpG:148610539-148610905
cg13023623	-0.476236	0.468266	-31.2634	2.88562e-46	2.63882e-42	95.0117	0.706384	0.230148	-0.476236	14	57276257	R	I	OTX2	5'UTR	island	5'UTR-island	chr14:57274607-57276840	NA	NA
cg00014998	-0.417978	0.649769	-31.104	4.19513e-46	3.75109e-42	94.6446	0.858757	0.44078	-0.417978	2	177014962	R	II	HOXD4	TSS1500	island	TSS1500-island	chr2:177014948-177015214	NA	NA
cg17104824	-0.421181	0.637426	-31.0727	4.51564e-46	3.9499e-42	94.5724	0.848016	0.426835	-0.421181	2	177014959	R	II	HOXD4	TSS1500	island	TSS1500-island	chr2:177014948-177015214	NA	NA
cg20785796	-0.475216	0.504948	-30.889	6.96665e-46	5.83993e-42	94.1469	0.742556	0.26734	-0.475216	2	200326721	R	I	SATB2	TSS1500	island	TSS1500-island	chr2:200320502-200329681	NA	NA
cg03091551	-0.525444	0.438661	-30.705	1.07782e-45	8.85068e-42	93.7185	0.701383	0.175939	-0.525444	14	57275967	R	II	OTX2	5'UTR	island	5'UTR-island	chr14:57274607-57276840	NA	NA
cg24377694	0.571746	0.632334	30.6525	1.22152e-45	9.83005e-42	93.5957	0.346461	0.918207	0.571746	20	1975372	R	I	PDYN	TSS1500	opensea	TSS1500-opensea		NA	NA
cg21647227	-0.521	0.431164	-30.5022	1.74831e-45	1.37934e-41	93.2436	0.691664	0.170664	-0.521	1	119527111	F	II	TBX15	5'UTR	island	5'UTR-island	chr1:119526782-119527192	TRUE	NA
cg01581084	-0.502266	0.531624	-30.4732	1.87418e-45	1.45021e-41	93.1753	0.782757	0.280491	-0.502266	8	99961874	F	II	OSR2	Body	shore	Body-shore	chr8:99960497-99961438	NA	TRUE
cg17408527	-0.41388	0.548562	-30.4419	2.01988e-45	1.53346e-41	93.1018	0.755502	0.341622	-0.41388	19	58629967	R	II	ZSCAN18	TSS200	island	TSS200-island	chr19:58629309-58630241	NA	NA
cg18397073	-0.421909	0.655051	-30.4061	2.20105e-45	1.64007e-41	93.0174	0.866005	0.444097	-0.421909	19	42600278	R	I	POU2F2	Body	island	Body-island	chr19:42599507-42600522	NA	NA
cg11066209	0.272443	0.235714	30.3591	2.46369e-45	1.7702e-41	92.9067	0.0994923	0.371936	0.272443	7	2282252	R	II	FTSJ2	TSS1500	shore	TSS1500-shore	chr7:2281362-2282105	NA	NA
cg14935646	-0.308268	0.676024	-30.3262	2.66626e-45	1.87848e-41	92.8291	0.830158	0.52189	-0.308268	7	27215464	R	I	HOXA10	Body	shore	Body-shore	chr7:27212416-27214396	NA	NA
cg22674699	-0.614206	0.392149	-29.9423	6.7405e-45	4.37447e-41	91.9177	0.699252	0.0850456	-0.614206	2	176987918	R	I	HOXD9	1stExon	island	1stExon-island	chr2:176986424-176988291	TRUE	TRUE
cg25594100	-0.443651	0.683416	-29.9193	7.12765e-45	4.5523e-41	91.8628	0.905241	0.46159	-0.443651	7	4786943	F	I	FOXK1	Body	island	Body-island	chr7:4786761-4786987	NA	NA
cg04455430	-0.416066	0.430487	-29.7605	1.04953e-44	6.30294e-41	91.4823	0.63852	0.222454	-0.416066	1	50886920	F	II	DMRTA2	Body	island	Body-island	chr1:50884228-50891471	NA	NA
cg05021643	-0.390181	0.380316	-29.6581	1.34812e-44	7.86147e-41	91.2361	0.575406	0.185225	-0.390181	2	177029608	F	I	HOXD3	5'UTR	island	5'UTR-island	chr2:177029413-177029941	NA	NA
cg22620221	-0.426886	0.340096	-29.6475	1.38361e-44	7.95314e-41	91.2106	0.553539	0.126653	-0.426886	7	153584416	F	I	DPP6	TSS200	island	TSS200-island	chr7:153583317-153585666	NA	NA	high-CpG:153215316-153215503
cg13784235	-0.529233	0.417609	-29.5892	1.59608e-44	9.04525e-41	91.0701	0.682225	0.152993	-0.529233	6	108495865	F	II	NR2E1	Body	island	Body-island	chr6:108495654-108495986	TRUE	NA		rs41287534
cg23130254	-0.549388	0.373689	-29.4728	2.12468e-44	1.15527e-40	90.7887	0.648383	0.0989949	-0.549388	2	176964588	R	II	HOXD12	1stExon	island	1stExon-island	chr2:176964062-176965509	NA	NA
cg14559259	-0.622004	0.418937	-29.4511	2.24131e-44	1.20244e-40	90.7361	0.729939	0.107935	-0.622004	2	223168575	R	II	CCDC140	5'UTR	shore	5'UTR-shore	chr2:223168653-223169008	NA	NA			rs78734419
cg25953239	-0.463605	0.392343	-29.4456	2.27195e-44	1.20285e-40	90.7227	0.624146	0.16054	-0.463605	2	176982342	R	I	HOXD10	Body	island	Body-island	chr2:176982107-176982402	NA	NA
cg16823083	-0.474138	0.376636	-29.3139	3.14492e-44	1.60179e-40	90.4028	0.613705	0.139567	-0.474138	1	3567412	F	I	WDR8	TSS1500	island	TSS1500-island	chr1:3566445-3569636	NA	NA
cg06365535	-0.406003	0.473306	-29.2655	3.54508e-44	1.73955e-40	90.2849	0.676307	0.270305	-0.406003	17	59534102	F	I	TBX4	Body	island	Body-island	chr17:59531723-59535254	NA	NA
cg25622366	-0.513008	0.340561	-29.2373	3.80147e-44	1.84288e-40	90.2162	0.597065	0.0840567	-0.513008	2	63281139	F	I	OTX1	Body	island	Body-island	chr2:63281034-63281347	NA	NA
cg26790247	-0.544577	0.527987	-29.1952	4.21986e-44	2.02136e-40	90.1135	0.800276	0.255699	-0.544577	3	147108512	R	II	ZIC4	Body	island	Body-island	chr3:147108511-147111703	NA	NA
cg11328436	-0.466899	0.507783	-29.1141	5.16106e-44	2.44312e-40	89.9153	0.741232	0.274333	-0.466899	12	54360511	F	II	HOTAIR	Body	island	Body-island	chr12:54360374-54360660	NA	NA
cg14231297	-0.429314	0.40272	-29.0946	5.41748e-44	2.50555e-40	89.8676	0.617378	0.188063	-0.429314	19	58629901	F	I	ZSCAN18	TSS200	island	TSS200-island	chr19:58629309-58630241	NA	NA		rs8109359
cg20345923	0.368418	0.593444	29.06	5.90435e-44	2.6397e-40	89.7828	0.409235	0.777653	0.368418	2	1983190	F	I	MYT1L	Body	opensea	Body-opensea		NA	NA
cg10659886	-0.339585	0.41701	-28.8739	9.39828e-44	4.11041e-40	89.3252	0.586803	0.247218	-0.339585	19	58629719	R	I	ZSCAN18	Body	island	Body-island	chr19:58629309-58630241	NA	NA
cg24496614	0.303752	0.281705	28.8285	1.05293e-43	4.50708e-40	89.2133	0.129829	0.433581	0.303752	11	61735970	F	II	FTH1	TSS1500	shore	TSS1500-shore	chr11:61734760-61735932	NA	NA
cg20823772	-0.390533	0.589778	-28.7519	1.27636e-43	5.29449e-40	89.0238	0.785045	0.394511	-0.390533	8	99962013	F	II	OSR2	Body	shore	Body-shore	chr8:99960497-99961438	NA	TRUE
cg02829688	-0.42138	0.444992	-28.6911	1.48699e-43	6.10529e-40	88.8733	0.655682	0.234302	-0.42138	1	119527008	F	II	TBX15	5'UTR	island	5'UTR-island	chr1:119526782-119527192	TRUE	NA
cg16919569	-0.408496	0.485832	-28.5917	1.91064e-43	7.76546e-40	88.6264	0.69008	0.281584	-0.408496	4	174452835	F	I	NBLA00301	Body	island	Body-island	chr4:174451828-174452962	NA	NA
cg07382920	-0.411416	0.327643	-28.5578	2.08143e-43	8.29212e-40	88.542	0.533352	0.121935	-0.411416	1	3567646	R	I	TP73	TSS1500	island	TSS1500-island	chr1:3566445-3569636	NA	NA
cg05938001	-0.457133	0.519757	-28.5442	2.15402e-43	8.49717e-40	88.5082	0.748323	0.29119	-0.457133	2	172952948	F	II	DLX1	Body	island	Body-island	chr2:172952809-172953160	NA	NA
cg06215569	-0.611559	0.362492	-28.5399	2.17761e-43	8.5068e-40	88.4975	0.668272	0.0567129	-0.611559	1	110611465	R	II	ALX3	Body	island	Body-island	chr1:110610265-110613303	NA	TRUE
cg21545390	-0.546775	0.473571	-28.4271	2.8975e-43	1.09987e-39	88.2161	0.746959	0.200183	-0.546775	7	96627190	F	II	DLX6AS	Body	opensea	Body-opensea		NA	NA
cg09579281	-0.390953	0.661549	-28.4075	3.0455e-43	1.14525e-39	88.167	0.857025	0.466072	-0.390953	7	30515286	F	II	NOD1	5'UTR	shelf	5'UTR-shelf	chr7:30517987-30518610	NA	NA
cg12268637	-0.435645	0.542987	-28.4008	3.09784e-43	1.15414e-39	88.1502	0.76081	0.325164	-0.435645	2	176964502	R	II	HOXD12	TSS200	island	TSS200-island	chr2:176964062-176965509	NA	NA
cg06158650	-0.533858	0.397116	-28.39	3.18402e-43	1.17537e-39	88.1232	0.664045	0.130187	-0.533858	1	119522637	F	II	TBX15	5'UTR	island	5'UTR-island	chr1:119522385-119522638	NA	NA
cg15660418	-0.466745	0.50594	-28.3814	3.25426e-43	1.19038e-39	88.1017	0.739313	0.272568	-0.466745	12	54409257	F	II	HOXC4	TSS1500	shore	TSS1500-shore	chr12:54408426-54408713	NA	NA
cg11117099	0.304922	0.236387	28.204	5.11243e-43	1.85323e-39	87.6564	0.083926	0.388848	0.304922	17	43325657	F	II	LOC100133991	Body	island	Body-island	chr17:43324689-43325729	NA	NA
cg16990168	-0.41225	0.596317	-28.1461	5.92758e-43	2.12953e-39	87.5106	0.802442	0.390192	-0.41225	1	119526060	F	II	TBX15	5'UTR	shore	5'UTR-shore	chr1:119526782-119527192	NA	NA
cg09359114	-0.486035	0.441041	-28.1354	6.09185e-43	2.16918e-39	87.4837	0.684058	0.198023	-0.486035	7	96650096	R	I	DLX5	Body	shore	Body-shore	chr7:96650221-96651551	NA	NA
cg07537821	0.475168	0.335893	28.1214	6.3138e-43	2.22849e-39	87.4484	0.0983092	0.573478	0.475168	11	122727440	R	II	CRTAM	Body	opensea	Body-opensea		TRUE	TRUE
cg23994043	-0.434015	0.408354	-28.0993	6.68207e-43	2.33796e-39	87.3925	0.625361	0.191347	-0.434015	2	200326725	R	I	SATB2	TSS1500	island	TSS1500-island	chr2:200320502-200329681	NA	NA
cg18786873	-0.463637	0.289612	-28.0872	6.89261e-43	2.39084e-39	87.3619	0.521431	0.0577938	-0.463637	1	110610899	R	I	ALX3	Body	island	Body-island	chr1:110610265-110613303	NA	TRUE
cg00995807	-0.342599	0.73747	-28.0531	7.52144e-43	2.54319e-39	87.2758	0.908769	0.56617	-0.342599	14	104172224	F	I	XRCC3	Body	opensea	Body-opensea		NA	NA		rs3212064
cg14427009	-0.394645	0.524514	-28.0433	7.71193e-43	2.58587e-39	87.2512	0.721837	0.327191	-0.394645	13	58207058	R	II	PCDH17	1stExon	island	1stExon-island	chr13:58206526-58208930	NA	NA
cg19519747	-0.397895	0.438923	-27.8959	1.12653e-42	3.72643e-39	86.8775	0.63787	0.239975	-0.397895	2	177014555	F	I	MIR10B	TSS1500	shore	TSS1500-shore	chr2:177014948-177015214	NA	NA		rs74849124
cg07153966	-0.402266	0.714245	-27.8948	1.12987e-42	3.72643e-39	86.8745	0.915378	0.513111	-0.402266	7	27147590	R	II	HOXA3	Body	island	Body-island	chr7:27147589-27148389	NA	NA
cg08610862	-0.570908	0.507772	-27.8685	1.20899e-42	3.9291e-39	86.8078	0.793226	0.222318	-0.570908	1	197888469	F	II	LHX9	Body	shore	Body-shore	chr1:197887088-197887791	NA	NA
cg27160395	-0.407604	0.655785	-27.8268	1.3463e-42	4.33368e-39	86.7017	0.859587	0.451983	-0.407604	2	177014949	R	II	HOXD4	TSS1500	island	TSS1500-island	chr2:177014948-177015214	NA	NA
cg13677149	-0.473487	0.351937	-27.801	1.43903e-42	4.55922e-39	86.636	0.58868	0.115193	-0.473487	7	27284789	R	I	EVX1	Body	island	Body-island	chr7:27284639-27286237	NA	NA
cg17083494	-0.512033	0.491495	-27.6828	1.95407e-42	6.09502e-39	86.3342	0.747512	0.235479	-0.512033	7	96654832	F	II	DLX5	TSS1500	shore	TSS1500-shore	chr7:96653467-96654199	NA	NA
cg20649017	-0.460215	0.341929	-27.6409	2.17834e-42	6.74227e-39	86.227	0.572037	0.111822	-0.460215	2	176980837	R	I	HOXD10	TSS1500	island	TSS1500-island	chr2:176980765-176981423	TRUE	NA
cg01839430	0.282517	0.208506	27.6127	2.34359e-42	7.19839e-39	86.1549	0.0672475	0.349764	0.282517	2	216177098	R	II	ATIC	Body	island	Body-island	chr2:216176549-216177132	NA	NA
cg04271289	-0.282258	0.746838	-27.5013	3.13148e-42	9.54553e-39	85.8689	0.887967	0.60571	-0.282258	19	1152147	R	I	SBNO2	Body	island	Body-island	chr19:1152015-1152249	TRUE	NA			rs77414169
cg20050826	-0.429928	0.545035	-27.4926	3.20342e-42	9.69139e-39	85.8465	0.759999	0.330071	-0.429928	12	52995295	F	II	KRT72	1stExon	island	1stExon-island	chr12:52994772-52995312	NA	NA
cg24898753	0.23458	0.214411	27.4882	3.2402e-42	9.72952e-39	85.8352	0.0971208	0.331701	0.23458	11	61735917	F	II	FTH1	TSS1500	island	TSS1500-island	chr11:61734760-61735932	NA	NA
cg17164954	-0.49688	0.549027	-27.444	3.63711e-42	1.08404e-38	85.7212	0.797467	0.300587	-0.49688	6	157345266	F	II	ARID1B	Body	shelf	Body-shelf	chr6:157342060-157343075	NA	NA		rs59609031
cg20950167	-0.412107	0.646443	-27.3989	4.09101e-42	1.21036e-38	85.6051	0.852496	0.440389	-0.412107	17	35300448	F	II	LHX1	3'UTR	island	3'UTR-island	chr17:35291899-35300875	NA	NA		rs71693251
cg07160746	-0.388128	0.410775	-27.3399	4.77453e-42	1.40228e-38	85.4526	0.604839	0.216711	-0.388128	20	43726765	R	I	KCNS1	Body	island	Body-island	chr20:43726297-43727372	TRUE	NA
cg13944175	-0.418128	0.33047	-27.3283	4.92159e-42	1.435e-38	85.4227	0.539534	0.121406	-0.418128	19	52222698	R	I	HAS1	Body	island	Body-island	chr19:52222423-52223208	NA	NA
cg07015195	-0.428512	0.55098	-27.2755	5.65246e-42	1.62455e-38	85.286	0.765236	0.336724	-0.428512	8	109093450	R	II	RSPO2	Body	shore	Body-shore	chr8:109094485-109095849	NA	NA
cg09578028	-0.570604	0.521077	-27.2044	6.81333e-42	1.93061e-38	85.1016	0.806379	0.235775	-0.570604	2	176987411	R	II	HOXD9	TSS200	island	TSS200-island	chr2:176986424-176988291	TRUE	TRUE
cg01701649	-0.45245	0.58015	-27.1023	8.91463e-42	2.45683e-38	84.8362	0.806375	0.353925	-0.45245	16	48589954	F	II	N4BP1	Body	opensea	Body-opensea		NA	TRUE
cg15105326	-0.334833	0.413736	-27.087	9.28009e-42	2.52299e-38	84.7965	0.581153	0.24632	-0.334833	3	147108916	R	I	ZIC4	Body	island	Body-island	chr3:147108511-147111703	NA	NA
cg16006349	-0.482275	0.498006	-27.0618	9.91924e-42	2.66151e-38	84.7307	0.739144	0.256868	-0.482275	12	54360460	R	II	HOTAIR	Body	island	Body-island	chr12:54360374-54360660	NA	NA
cg17774559	-0.582321	0.440059	-27.0617	9.92191e-42	2.66151e-38	84.7305	0.731219	0.148899	-0.582321	5	1879698	F	I	IRX4	Body	island	Body-island	chr5:1879689-1879928	NA	NA
cg06495961	-0.536707	0.484606	-27.0096	1.13862e-41	3.01412e-38	84.5945	0.752959	0.216253	-0.536707	7	153584582	R	II	DPP6	1stExon	island	1stExon-island	chr7:153583317-153585666	NA	NA
cg02772121	0.508707	0.552984	26.994	1.18677e-41	3.12104e-38	84.5536	0.29863	0.807337	0.508707	6	30130881	F	I	TRIM15	TSS200	opensea	TSS200-opensea		NA	TRUE		rs2517625
cg16330786	0.349288	0.636855	26.9788	1.23536e-41	3.20691e-38	84.514	0.462211	0.811499	0.349288	2	75326898	R	II	TACR1	Body	opensea	Body-opensea		NA	TRUE
cg03331474	-0.37665	0.706718	-26.9479	1.3405e-41	3.45754e-38	84.4333	0.895042	0.518393	-0.37665	7	27163331	F	II	HOXA3	5'UTR	shore	5'UTR-shore	chr7:27163819-27164098	NA	TRUE
cg07489502	-0.428227	0.343804	-26.9275	1.41505e-41	3.59604e-38	84.3799	0.557918	0.12969	-0.428227	5	140811642	F	I	PCDHGA4	Body	island	Body-island	chr5:140810494-140812617	NA	NA
cg17174023	-0.512102	0.517016	-26.897	1.53421e-41	3.85824e-38	84.3	0.773067	0.260965	-0.512102	22	50987453	F	II	KLHDC7B	1stExon	island	1stExon-island	chr22:50984972-50988141	NA	NA
cg15798385	-0.425931	0.590083	-26.8409	1.78077e-41	4.42301e-38	84.1528	0.803049	0.377118	-0.425931	7	27281569	F	II	EVX1	TSS1500	shore	TSS1500-shore	chr7:27282086-27283136	NA	NA
cg25631489	0.416343	0.382796	26.8329	1.81927e-41	4.46353e-38	84.1317	0.174624	0.590967	0.416343	3	169900020	R	II	PHC3	TSS1500	shore	TSS1500-shore	chr3:169898946-169899626	NA	NA
cg03465861	-0.410517	0.475814	-26.8276	1.84499e-41	4.49919e-38	84.1178	0.681073	0.270556	-0.410517	15	76630660	R	II	ISL2	Body	island	Body-island	chr15:76630029-76630970	NA	NA
cg00575896	-0.291453	0.733775	-26.8104	1.93158e-41	4.65394e-38	84.0725	0.879502	0.588048	-0.291453	3	50357171	F	II	HYAL2	Body	shore	Body-shore	chr3:50357453-50357683	NA	TRUE
cg04738965	-0.496948	0.379923	-26.7475	2.28333e-41	5.37275e-38	83.9073	0.628397	0.131449	-0.496948	3	147127662	R	I	ZIC1	1stExon	island	1stExon-island	chr3:147126988-147128999	TRUE	TRUE
cg01772014	0.294897	0.246668	26.7386	2.33858e-41	5.47077e-38	83.8836	0.0992195	0.394116	0.294897	20	30606095	F	II	C20orf160	Body	shore	Body-shore	chr20:30606492-30607174	TRUE	NA
cg07860213	-0.501643	0.345681	-26.6784	2.74567e-41	6.34927e-38	83.7251	0.596502	0.0948591	-0.501643	8	70982039	R	I	PRDM14	Body	island	Body-island	chr8:70981873-70984888	TRUE	NA
cg02566627	-0.48032	0.39457	-26.6314	3.11324e-41	7.15811e-38	83.601	0.63473	0.154409	-0.48032	12	58232984	F	II	CTDSP2	Body	opensea	Body-opensea		NA	TRUE
cg13962372	-0.31975	0.707469	-26.6173	3.23303e-41	7.34956e-38	83.5637	0.867345	0.547594	-0.31975	1	22415149	F	II	CDC42	Body	opensea	Body-opensea		NA	TRUE
cg00144335	-0.283165	0.716372	-26.5388	3.98936e-41	8.96757e-38	83.3559	0.857954	0.57479	-0.283165	4	107176	R	II	ZNF718	Body	island	Body-island	chr4:107146-107898	NA	NA
cg08393041	-0.557967	0.486794	-26.5258	4.13161e-41	9.1847e-38	83.3213	0.765778	0.20781	-0.557967	3	147109426	F	II	ZIC4	Body	island	Body-island	chr3:147108511-147111703	NA	NA		rs16859411
cg20688917	-0.425313	0.673788	-26.517	4.23047e-41	9.3017e-38	83.2979	0.886445	0.461132	-0.425313	7	27160674	F	II	HOXA3	5'UTR	shore	5'UTR-shore	chr7:27162087-27162426	NA	NA
cg08139247	-0.324314	0.44599	-26.5014	4.41094e-41	9.64579e-38	83.2567	0.608147	0.283833	-0.324314	14	38725312	R	I	CLEC14A	1stExon	island	1stExon-island	chr14:38724254-38725537	NA	NA	high-CpG:37795015-37795125
cg16746576	-0.511441	0.433164	-26.4674	4.83321e-41	1.04556e-37	83.1663	0.688884	0.177443	-0.511441	8	99962118	R	II	OSR2	Body	shore	Body-shore	chr8:99960497-99961438	NA	TRUE
cg26069745	-0.436011	0.498734	-26.4516	5.04191e-41	1.08487e-37	83.1245	0.716739	0.280728	-0.436011	7	27142200	F	II	HOXA2	1stExon	shore	1stExon-shore	chr7:27143181-27143479	NA	NA		rs72221474
cg03655683	-0.550736	0.441268	-26.4479	5.09316e-41	1.08487e-37	83.1145	0.716636	0.1659	-0.550736	2	63281383	F	II	OTX1	Body	shore	Body-shore	chr2:63282514-63283122	NA	NA
cg20377305	-0.428706	0.41361	-26.4476	5.09762e-41	1.08487e-37	83.1137	0.627963	0.199257	-0.428706	7	96650668	R	I	DLX5	Body	island	Body-island	chr7:96650221-96651551	NA	NA
cg19760241	-0.506511	0.415147	-26.445	5.13228e-41	1.08487e-37	83.107	0.668402	0.161892	-0.506511	17	35300010	F	I	LHX1	Body	island	Body-island	chr17:35291899-35300875	NA	NA
cg26026748	0.383532	0.244634	26.4438	5.14977e-41	1.08487e-37	83.1036	0.0528681	0.4364	0.383532	1	164629875	F	II	PBX1	Body	opensea	Body-opensea		NA	TRUE
cg06117072	-0.434977	0.475911	-26.3687	6.30344e-41	1.30738e-37	82.9038	0.693399	0.258422	-0.434977	6	50791385	R	II	TFAP2B	Body	island	Body-island	chr6:50791110-50791573	NA	NA
cg06544111	-0.557281	0.462582	-26.3557	6.52841e-41	1.34709e-37	82.8691	0.741222	0.183942	-0.557281	7	27281344	R	II	EVX1	TSS1500	shore	TSS1500-shore	chr7:27282086-27283136	NA	TRUE
cg26444528	-0.441984	0.360591	-26.3406	6.80018e-41	1.39601e-37	82.8288	0.581583	0.1396	-0.441984	13	58207859	R	I	PCDH17	1stExon	island	1stExon-island	chr13:58206526-58208930	NA	NA	high-CpG:57105859-57105866
cg22829917	-0.4562	0.406525	-26.3313	6.97343e-41	1.42431e-37	82.804	0.634625	0.178425	-0.4562	12	54357408	F	II	HOTAIR	Body	shore	Body-shore	chr12:54354529-54355491	NA	NA		rs60674771	rs74348153
cg10168149	-0.518597	0.324485	-26.3185	7.2174e-41	1.45932e-37	82.77	0.583783	0.0651865	-0.518597	2	200335558	F	I	FLJ32063	Body	island	Body-island	chr2:200335497-200336413	NA	NA
cg22694818	-0.367031	0.399997	-26.3013	7.56171e-41	1.51373e-37	82.7239	0.583512	0.216481	-0.367031	1	75595970	F	I	LHX8	5'UTR	island	5'UTR-island	chr1:75595813-75596162	NA	TRUE			rs41289230
cg05323533	-0.418426	0.558466	-26.2931	7.72995e-41	1.53975e-37	82.7021	0.767679	0.349253	-0.418426	4	41750362	R	II	PHOX2B	Body	shore	Body-shore	chr4:41752280-41752502	NA	NA
cg04549287	-0.225359	0.711452	-26.2841	7.92067e-41	1.56997e-37	82.678	0.824131	0.598772	-0.225359	13	52952319	F	I	THSD1	Body	opensea	Body-opensea		NA	NA
cg07974511	-0.536459	0.438361	-26.279	8.03032e-41	1.5839e-37	82.6645	0.70659	0.170132	-0.536459	2	63283013	F	I	OTX1	Body	island	Body-island	chr2:63282514-63283122	NA	TRUE		rs61742369
cg18604419	0.417376	0.71665	26.2744	8.1323e-41	1.59619e-37	82.652	0.507962	0.925338	0.417376	14	101513037	F	I	MIR889	TSS1500	opensea	TSS1500-opensea		NA	NA
cg12404831	-0.427661	0.576917	-26.2525	8.62855e-41	1.68537e-37	82.5934	0.790747	0.363087	-0.427661	2	192114017	F	II	MYO1B	5'UTR	shelf	5'UTR-shelf	chr2:192109828-192110940	NA	NA		rs72912411
cg09806671	-0.318353	0.360881	-26.2447	8.81089e-41	1.7113e-37	82.5728	0.520058	0.201705	-0.318353	1	165324679	F	I	LMX1A	Body	island	Body-island	chr1:165324191-165326328	TRUE	NA			rs35170013
cg14377152	-0.241031	0.765992	-26.2432	8.84636e-41	1.7113e-37	82.5688	0.886508	0.645477	-0.241031	15	45431690	F	II	DUOX1	Body	shelf	Body-shelf	chr15:45427296-45428206	NA	NA
cg20172563	-0.298416	0.776117	-26.2059	9.78834e-41	1.88346e-37	82.4687	0.925325	0.626909	-0.298416	6	47487173	F	II	CD2AP	Body	opensea	Body-opensea		NA	TRUE
cg12127282	-0.46801	0.537577	-26.2043	9.82995e-41	1.88346e-37	82.4645	0.771582	0.303572	-0.46801	2	177014685	R	II	HOXD4	TSS1500	shore	TSS1500-shore	chr2:177014948-177015214	NA	NA
cg06708634	-0.368973	0.633231	-26.1971	1.00247e-40	1.90602e-37	82.4452	0.817718	0.448745	-0.368973	6	100906895	F	II	SIM1	Body	shore	Body-shore	chr6:100905444-100905697	NA	NA		rs71757951
cg13655674	-0.516592	0.367471	-26.1964	1.00424e-40	1.90602e-37	82.4434	0.625768	0.109175	-0.516592	1	119522386	R	II	TBX15	5'UTR	island	5'UTR-island	chr1:119522385-119522638	NA	NA
cg00945234	-0.462233	0.367291	-26.19	1.02175e-40	1.93014e-37	82.4263	0.598407	0.136175	-0.462233	1	50886411	F	II	DMRTA2	Body	island	Body-island	chr1:50884228-50891471	NA	NA
cg24021846	0.44162	0.507459	26.1874	1.02907e-40	1.93488e-37	82.4193	0.286649	0.728269	0.44162	7	103556529	F	II	RELN	Body	opensea	Body-opensea		NA	TRUE
cg18115040	-0.404239	0.389498	-26.1348	1.18698e-40	2.18083e-37	82.2781	0.591617	0.187378	-0.404239	2	176981328	R	I	HOXD10	TSS200	island	TSS200-island	chr2:176980765-176981423	TRUE	NA			rs79175736
cg12149299	-0.451927	0.528193	-26.1184	1.24084e-40	2.26944e-37	82.2342	0.754156	0.302229	-0.451927	12	96762309	R	II	CDK17	5'UTR	opensea	5'UTR-opensea		NA	TRUE
cg03639223	-0.245375	0.742015	-26.1127	1.26037e-40	2.29472e-37	82.2188	0.864703	0.619328	-0.245375	17	7369125	F	II	ZBTB4	Body	island	Body-island	chr17:7369001-7369244	NA	NA
cg18161890	-0.411092	0.475357	-26.0887	1.34547e-40	2.43864e-37	82.1542	0.680903	0.269811	-0.411092	12	52995250	R	I	KRT72	1stExon	island	1stExon-island	chr12:52994772-52995312	NA	NA
cg06055873	-0.440695	0.54089	-26.0693	1.41817e-40	2.55887e-37	82.1021	0.761237	0.320542	-0.440695	7	27142204	F	II	HOXA2	1stExon	shore	1stExon-shore	chr7:27143181-27143479	NA	NA		rs72221474
cg01015899	-0.368999	0.551647	-26.0589	1.45908e-40	2.62093e-37	82.074	0.736147	0.367148	-0.368999	12	120663812	F	I	PXN	5'UTR	opensea	5'UTR-opensea		NA	NA	low-CpG:119148181-119148221		rs73415011
cg19473529	-0.530731	0.410319	-26.0185	1.62846e-40	2.89931e-37	81.9654	0.675685	0.144953	-0.530731	20	48726783	F	II	UBE2V1	Body	shelf	Body-shelf	chr20:48729268-48729798	NA	NA
cg26381210	-0.424408	0.588336	-26.0159	1.64038e-40	2.90191e-37	81.9582	0.800541	0.376132	-0.424408	10	88632654	F	II	BMPR1A	5'UTR	opensea	5'UTR-opensea		NA	TRUE
cg12308746	-0.526282	0.522669	-25.9772	1.8229e-40	3.17745e-37	81.8539	0.78581	0.259528	-0.526282	2	172952415	R	II	DLX1	Body	shore	Body-shore	chr2:172952809-172953160	NA	TRUE
cg18194945	-0.443605	0.561993	-25.9769	1.82418e-40	3.17745e-37	81.8532	0.783796	0.34019	-0.443605	3	157820591	R	II	SHOX2	Body	shore	Body-shore	chr3:157821232-157821604	NA	NA
cg02694427	-0.461452	0.380311	-25.9465	1.98199e-40	3.40809e-37	81.7711	0.611037	0.149585	-0.461452	2	176964512	R	I	HOXD12	TSS200	island	TSS200-island	chr2:176964062-176965509	NA	NA
cg20399871	-0.436425	0.405468	-25.925	2.102e-40	3.59906e-37	81.713	0.623681	0.187256	-0.436425	7	27204663	R	II	HOXA9	1stExon	island	1stExon-island	chr7:27203915-27206462	TRUE	NA
cg15138339	0.409395	0.642769	25.9209	2.1259e-40	3.62456e-37	81.7018	0.438072	0.847466	0.409395	17	40715222	F	I	COASY	1stExon	island	1stExon-island	chr17:40714087-40715282	NA	NA	low-CpG:37968723-37968775
cg02530022	-0.557526	0.478732	-25.9078	2.20328e-40	3.74064e-37	81.6664	0.757495	0.199969	-0.557526	7	96642708	F	II	DLX6AS	Body	shelf	Body-shelf	chr7:96645786-96646599	NA	NA
cg05922610	-0.411517	0.335119	-25.8934	2.29149e-40	3.87405e-37	81.6276	0.540878	0.12936	-0.411517	6	108495985	F	I	NR2E1	Body	island	Body-island	chr6:108495654-108495986	TRUE	NA
cg04088697	-0.502133	0.39829	-25.8064	2.90795e-40	4.81511e-37	81.3919	0.649357	0.147223	-0.502133	7	96627050	F	II	DLX6AS	Body	opensea	Body-opensea		NA	NA		rs1476605
cg07953015	-0.424998	0.690444	-25.8039	2.92825e-40	4.82884e-37	81.385	0.902943	0.477945	-0.424998	19	48285322	F	II	SEPW1	3'UTR	shelf	3'UTR-shelf	chr19:48281585-48282351	NA	NA
cg27260772	-0.608785	0.402112	-25.7694	3.219e-40	5.22269e-37	81.2914	0.706505	0.0977197	-0.608785	6	50791202	F	I	TFAP2B	Body	island	Body-island	chr6:50791110-50791573	NA	NA
cg21945930	-0.486013	0.481815	-25.7523	3.37348e-40	5.45133e-37	81.245	0.724822	0.238809	-0.486013	7	96631580	F	II	DLX6AS	Body	island	Body-island	chr7:96631383-96631800	NA	TRUE
cg04910970	-0.301892	0.67367	-25.7438	3.45308e-40	5.55765e-37	81.2219	0.824616	0.522724	-0.301892	6	100053930	F	II	PRDM13	TSS1500	shore	TSS1500-shore	chr6:100054686-100054988	NA	NA
cg07539798	-0.281256	0.668906	-25.7283	3.60423e-40	5.75488e-37	81.1796	0.809534	0.528278	-0.281256	5	140811312	F	II	PCDHGA4	Body	island	Body-island	chr5:140810494-140812617	NA	NA
cg14410016	-0.34969	0.487732	-25.7152	3.73632e-40	5.94221e-37	81.144	0.662577	0.312887	-0.34969	2	176986659	F	I	HOXD9	TSS1500	island	TSS1500-island	chr2:176986424-176988291	NA	TRUE
cg09361748	0.393712	0.551876	25.6927	3.97483e-40	6.29665e-37	81.0827	0.355019	0.748732	0.393712	7	71682306	R	II	CALN1	Body	opensea	Body-opensea		NA	NA
cg18944010	-0.472514	0.458428	-25.6304	4.71895e-40	7.41703e-37	80.9129	0.694686	0.222171	-0.472514	1	119522855	F	II	TBX15	5'UTR	shore	5'UTR-shore	chr1:119522385-119522638	NA	NA
cg06525280	0.337562	0.315932	25.6021	5.10257e-40	7.98878e-37	80.8356	0.147151	0.484713	0.337562	2	216177303	R	II	ATIC	Body	shore	Body-shore	chr2:216176549-216177132	NA	NA
cg06523556	0.465874	0.353649	25.5823	5.38899e-40	8.32074e-37	80.7816	0.120712	0.586586	0.465874	8	42623786	F	II	CHRNA6	TSS200	opensea	TSS200-opensea		NA	NA			rs56376656
cg25092838	-0.509705	0.354479	-25.5819	5.39492e-40	8.32074e-37	80.7805	0.609332	0.0996266	-0.509705	14	57279115	R	I	OTX2OS1	TSS1500	island	TSS1500-island	chr14:57278709-57279116	NA	NA
cg03983270	-0.275447	0.733903	-25.5817	5.39732e-40	8.32074e-37	80.78	0.871627	0.59618	-0.275447	16	81731249	R	I	CMIP	Body	opensea	Body-opensea		TRUE	NA
cg01280080	0.359323	0.293289	25.5758	5.48629e-40	8.42562e-37	80.7638	0.113628	0.47295	0.359323	2	216177276	R	II	ATIC	Body	shore	Body-shore	chr2:216176549-216177132	NA	NA
cg25614364	-0.362019	0.691844	-25.5065	6.64483e-40	1.00893e-36	80.5743	0.872854	0.510835	-0.362019	4	129747274	R	II	PHF17	5'UTR	opensea	5'UTR-opensea		NA	TRUE
cg18780257	-0.399547	0.316004	-25.5002	6.76245e-40	1.02293e-36	80.5569	0.515778	0.116231	-0.399547	3	192126023	F	I	FGF12	5'UTR	island	5'UTR-island	chr3:192125821-192127994	NA	NA		rs2669296
cg04548856	-0.519543	0.360684	-25.4803	7.14392e-40	1.07659e-36	80.5026	0.620455	0.100912	-0.519543	14	57284528	R	II	OTX2OS1	Body	island	Body-island	chr14:57283967-57284558	NA	NA
cg01595717	-0.493852	0.488148	-25.4639	7.476e-40	1.11746e-36	80.4576	0.735074	0.241222	-0.493852	9	140586201	F	II	EHMT1	Body	shore	Body-shore	chr9:140588011-140588931	NA	NA
cg18180569	-0.588627	0.382884	-25.4629	7.49845e-40	1.11746e-36	80.4546	0.677198	0.0885706	-0.588627	1	44883362	R	II	RNF220	Body	island	Body-island	chr1:44883136-44884272	TRUE	NA
cg25371634	-0.587454	0.378612	-25.4239	8.35335e-40	1.24027e-36	80.3478	0.672339	0.084885	-0.587454	2	176981422	F	II	HOXD10	TSS200	island	TSS200-island	chr2:176980765-176981423	TRUE	NA
cg21338225	-0.391133	0.596484	-25.3613	9.9405e-40	1.46511e-36	80.1756	0.79205	0.400917	-0.391133	7	30179748	F	II	C7orf41	Body	shelf	Body-shelf	chr7:30174230-30176169	NA	NA
cg25827710	0.392781	0.292834	25.3168	1.12522e-39	1.63382e-36	80.0529	0.0964435	0.489224	0.392781	13	46742802	R	II	LCP1	5'UTR	opensea	5'UTR-opensea		NA	NA
cg23023126	-0.265977	0.814369	-25.3115	1.14193e-39	1.64688e-36	80.0383	0.947358	0.681381	-0.265977	19	308808	R	I	MIER2	Body	island	Body-island	chr19:308413-308930	NA	NA
cg26214026	-0.322802	0.753025	-25.2819	1.23995e-39	1.7585e-36	79.9568	0.914426	0.591624	-0.322802	12	111926384	R	II	ATXN2	Body	opensea	Body-opensea		NA	TRUE
cg11754318	-0.362549	0.578675	-25.2816	1.24119e-39	1.7585e-36	79.9558	0.759949	0.397401	-0.362549	2	176964506	R	II	HOXD12	TSS200	island	TSS200-island	chr2:176964062-176965509	NA	NA
cg00388812	-0.31619	0.571846	-25.2307	1.43055e-39	2.01262e-36	79.8153	0.729941	0.413751	-0.31619	8	99961376	R	II	OSR2	Body	island	Body-island	chr8:99960497-99961438	NA	TRUE
cg17423650	-0.297108	0.760172	-25.2104	1.51384e-39	2.115e-36	79.7592	0.908725	0.611618	-0.297108	1	185218725	R	II	C1orf26	Body	opensea	Body-opensea		NA	TRUE
cg23019935	-0.560773	0.34233	-25.2006	1.55565e-39	2.1659e-36	79.7322	0.622717	0.0619435	-0.560773	1	22416488	R	II	CDC42	Body	opensea	Body-opensea		NA	TRUE
cg19939077	0.313224	0.280984	25.1864	1.61879e-39	2.24604e-36	79.6929	0.124373	0.437596	0.313224	10	81108060	F	II	PPIF	Body	shore	Body-shore	chr10:81107082-81107488	NA	NA
cg25135457	0.423177	0.686977	25.1678	1.70499e-39	2.3575e-36	79.6415	0.475389	0.898566	0.423177	17	40715244	F	I	COASY	1stExon	island	1stExon-island	chr17:40714087-40715282	NA	NA	low-CpG:37968723-37968775
cg16204205	-0.285975	0.769688	-25.1659	1.71444e-39	2.36246e-36	79.636	0.912675	0.6267	-0.285975	18	19753432	F	II	GATA6	Body	shore	Body-shore	chr18:19744936-19752363	NA	NA
cg09395443	-0.27289	0.728127	-25.1592	1.74657e-39	2.39852e-36	79.6176	0.864572	0.591682	-0.27289	7	4746437	R	II	FOXK1	Body	opensea	Body-opensea		NA	TRUE
cg00682263	-0.468046	0.618451	-25.1175	1.96322e-39	2.66872e-36	79.5019	0.852474	0.384427	-0.468046	15	66188803	R	II	MEGF11	3'UTR	opensea	3'UTR-opensea		NA	NA
cg03874199	-0.518225	0.39479	-25.099	2.06759e-39	2.79172e-36	79.4506	0.653903	0.135677	-0.518225	2	176964456	R	II	HOXD12	TSS200	island	TSS200-island	chr2:176964062-176965509	NA	NA
cg04467618	-0.412607	0.477778	-25.0548	2.34044e-39	3.13907e-36	79.3278	0.684081	0.271474	-0.412607	6	134210946	F	II	TCF21	1stExon	island	1stExon-island	chr6:134210639-134211218	TRUE	NA		rs78733835
cg00390143	0.452959	0.692329	25.0496	2.37453e-39	3.17421e-36	79.3135	0.465849	0.918808	0.452959	12	132842539	R	II	GALNT9	Body	island	Body-island	chr12:132842538-132842784	NA	NA
cg13307880	-0.462087	0.489364	-25.0347	2.4766e-39	3.2997e-36	79.2718	0.720408	0.258321	-0.462087	5	140744367	R	II	PCDHGA4	Body	island	Body-island	chr5:140743961-140744642	NA	NA
cg03517024	-0.239482	0.801314	-25.0255	2.54133e-39	3.37476e-36	79.2463	0.921055	0.681573	-0.239482	16	2221057	R	I	TRAF7	Body	opensea	Body-opensea		NA	NA
cg01552919	-0.256899	0.715249	-24.9987	2.73988e-39	3.60276e-36	79.1718	0.843699	0.5868	-0.256899	4	901847	R	I	GAK	Body	shore	Body-shore	chr4:899774-899985	NA	TRUE
cg10823473	-0.318692	0.348052	-24.9824	2.8683e-39	3.75934e-36	79.1264	0.507398	0.188706	-0.318692	15	76630514	R	I	ISL2	Body	island	Body-island	chr15:76630029-76630970	NA	NA
cg10511988	-0.503723	0.483476	-24.9676	2.99034e-39	3.89392e-36	79.0852	0.735337	0.231615	-0.503723	10	118891706	F	II	VAX1	3'UTR	shore	3'UTR-shore	chr10:118892161-118892639	NA	NA		rs74159040
cg15368455	-0.372093	0.620175	-24.9532	3.11386e-39	4.03512e-36	79.0451	0.806221	0.434128	-0.372093	5	37835958	R	II	GDNF	TSS1500	shore	TSS1500-shore	chr5:37836747-37840726	NA	TRUE
cg07011913	-0.504997	0.49096	-24.9527	3.11884e-39	4.03512e-36	79.0435	0.743458	0.238461	-0.504997	2	177014626	R	II	HOXD4	TSS1500	shore	TSS1500-shore	chr2:177014948-177015214	NA	NA
cg14565725	-0.397688	0.411834	-24.9492	3.14967e-39	4.06195e-36	79.0337	0.610678	0.21299	-0.397688	1	119532044	R	I	TBX15	1stExon	island	1stExon-island	chr1:119531991-119532196	NA	TRUE
cg07778029	-0.501933	0.337399	-24.9456	3.1814e-39	4.08976e-36	79.0238	0.588365	0.0864324	-0.501933	7	27205114	F	II	HOXA9	1stExon	island	1stExon-island	chr7:27203915-27206462	TRUE	NA	high-CpG:27171616-27171685
cg07203423	-0.435716	0.332291	-24.9152	3.46624e-39	4.41364e-36	78.9389	0.550149	0.114433	-0.435716	2	74743009	R	I	TLX2	Body	island	Body-island	chr2:74740455-74743795	NA	NA			rs74995202
cg07279070	-0.440783	0.472806	-24.8969	3.65004e-39	4.61843e-36	78.8877	0.693198	0.252414	-0.440783	2	73148229	F	II	EMX1	Body	island	Body-island	chr2:73143055-73148260	NA	NA
cg03763508	-0.441299	0.644488	-24.8909	3.71196e-39	4.68206e-36	78.8711	0.865138	0.423838	-0.441299	7	27140942	R	II	HOXA2	Body	shelf	Body-shelf	chr7:27143181-27143479	NA	TRUE
cg23068499	-0.43732	0.521654	-24.8331	4.37001e-39	5.44382e-36	78.7094	0.740314	0.302994	-0.43732	2	176986026	F	II	HOXD9	TSS1500	shore	TSS1500-shore	chr2:176986424-176988291	NA	NA
cg00754604	-0.340206	0.746699	-24.8293	4.41707e-39	5.47575e-36	78.6988	0.916802	0.576596	-0.340206	2	161230046	R	II	RBMS1	Body	opensea	Body-opensea		NA	TRUE
cg17046586	-0.383107	0.716369	-24.8289	4.42285e-39	5.47575e-36	78.6975	0.907923	0.524816	-0.383107	12	50665774	R	II	LIMA1	5'UTR	opensea	5'UTR-opensea		NA	TRUE
cg08293531	-0.264089	0.793458	-24.8276	4.43891e-39	5.47877e-36	78.6939	0.925502	0.661413	-0.264089	15	101601180	F	I	LRRK1	Body	opensea	Body-opensea		NA	NA		rs35376186
cg25800765	-0.454471	0.463713	-24.8171	4.57212e-39	5.62216e-36	78.6646	0.690949	0.236477	-0.454471	12	85673347	F	II	ALX1	TSS1500	shore	TSS1500-shore	chr12:85673878-85674700	NA	NA
cg22772747	-0.371143	0.706404	-24.8163	4.58303e-39	5.62216e-36	78.6623	0.891976	0.520833	-0.371143	7	27164285	R	II	HOXA3	5'UTR	shore	5'UTR-shore	chr7:27162087-27162426	NA	TRUE
cg24327132	0.430876	0.328392	24.7983	4.82139e-39	5.89659e-36	78.612	0.112954	0.54383	0.430876	15	72520632	F	II	PKM2	5'UTR	shore	5'UTR-shore	chr15:72522131-72524238	NA	NA
cg09494609	0.298425	0.222633	24.7535	5.47478e-39	6.59546e-36	78.4861	0.0734206	0.371846	0.298425	12	53448180	F	II	TENC1	Body	island	Body-island	chr12:53448008-53448406	NA	NA	high-CpG:51734434-51734495
cg22417733	0.314205	0.240687	24.7415	5.66294e-39	6.79167e-36	78.4527	0.0835847	0.39779	0.314205	6	153303409	R	II	FBXO5	5'UTR	island	5'UTR-island	chr6:153303408-153304973	NA	NA
cg25125060	-0.407373	0.453414	-24.741	5.67142e-39	6.79167e-36	78.4512	0.6571	0.249727	-0.407373	6	108488915	R	II	NR2E1	Body	island	Body-island	chr6:108485671-108490539	NA	NA
cg07961632	0.298515	0.226844	24.7341	5.78314e-39	6.90491e-36	78.4318	0.0775861	0.376101	0.298515	1	27668421	R	II	SYTL1	TSS200	opensea	TSS200-opensea		TRUE	TRUE
cg18451814	-0.43503	0.427749	-24.7211	6.00097e-39	7.1438e-36	78.3952	0.645264	0.210233	-0.43503	14	57278188	R	I	OTX2	TSS1500	island	TSS1500-island	chr14:57278068-57278287	NA	NA
cg22396979	0.324752	0.622551	24.7049	6.28215e-39	7.43454e-36	78.3499	0.460175	0.784927	0.324752	8	143915919	F	I	GML	TSS1500	shore	TSS1500-shore	chr8:143916135-143916405	NA	NA
cg26019295	-0.523079	0.443956	-24.6952	6.45781e-39	7.62001e-36	78.3225	0.705495	0.182417	-0.523079	12	54409212	R	II	HOXC4	TSS1500	shore	TSS1500-shore	chr12:54408426-54408713	NA	NA
cg19072291	-0.367211	0.584458	-24.6798	6.74636e-39	7.89106e-36	78.2792	0.768064	0.400852	-0.367211	7	65617362	F	I	CRCP	3'UTR	opensea	3'UTR-opensea		NA	TRUE
cg15339231	-0.498847	0.466344	-24.66	7.13767e-39	8.30051e-36	78.2234	0.715767	0.21692	-0.498847	7	96650407	R	II	DLX5	Body	island	Body-island	chr7:96650221-96651551	NA	NA
cg17419888	-0.425114	0.606037	-24.6494	7.35508e-39	8.5287e-36	78.1936	0.818594	0.39348	-0.425114	2	23840555	F	II	KLHL29	Body	opensea	Body-opensea		TRUE	NA		rs80351465
cg05667348	-0.496371	0.343725	-24.6209	7.97585e-39	9.14312e-36	78.1133	0.591911	0.0955396	-0.496371	10	118892581	F	I	VAX1	Body	island	Body-island	chr10:118892161-118892639	NA	NA
cg05754861	-0.275577	0.673762	-24.6039	8.37245e-39	9.5705e-36	78.0653	0.81155	0.535974	-0.275577	8	99961768	R	II	OSR2	Body	shore	Body-shore	chr8:99960497-99961438	NA	TRUE
cg19618279	0.393765	0.644297	24.588	8.7603e-39	9.95727e-36	78.0204	0.447414	0.841179	0.393765	17	40715228	F	I	COASY	1stExon	island	1stExon-island	chr17:40714087-40715282	NA	NA	low-CpG:37968723-37968775
cg20051772	0.346638	0.311362	24.5618	9.43814e-39	1.06675e-35	77.9465	0.138043	0.484681	0.346638	12	56325015	F	II	DGKA	TSS1500	shore	TSS1500-shore	chr12:56325774-56326223	TRUE	NA
cg24419094	-0.422359	0.65496	-24.5095	1.0959e-38	1.22829e-35	77.7985	0.866139	0.44378	-0.422359	2	10266986	R	II	RRM2	Body	shelf	Body-shelf	chr2:10262173-10263481	NA	NA			rs72544299
cg09305161	-0.424977	0.580701	-24.5033	1.11548e-38	1.24677e-35	77.781	0.793189	0.368213	-0.424977	6	106551032	F	II	PRDM1	Body	opensea	Body-opensea		NA	NA
cg21529807	0.351101	0.374097	24.4913	1.1544e-38	1.28669e-35	77.747	0.198547	0.549648	0.351101	19	42134478	R	II	CEACAM4	TSS1500	opensea	TSS1500-opensea		NA	NA
cg01405040	-0.513912	0.362323	-24.4671	1.23682e-38	1.37096e-35	77.6786	0.619279	0.105367	-0.513912	2	176964137	R	I	HOXD12	TSS1500	island	TSS1500-island	chr2:176964062-176965509	NA	TRUE
cg21077957	0.323783	0.647005	24.4588	1.2665e-38	1.39617e-35	77.6551	0.485114	0.808897	0.323783	8	142505227	F	II	FLJ43860	Body	opensea	Body-opensea		NA	NA		rs2748405
cg07362328	-0.426447	0.424472	-24.414	1.4398e-38	1.5733e-35	77.528	0.637695	0.211248	-0.426447	1	50886393	F	II	DMRTA2	Body	island	Body-island	chr1:50884228-50891471	NA	NA
cg24988255	-0.479139	0.485198	-24.4049	1.47781e-38	1.59845e-35	77.5022	0.724767	0.245628	-0.479139	7	27225396	F	II	HOXA11AS	Body	island	Body-island	chr7:27225050-27225629	NA	NA			rs61741589
cg03013817	0.301617	0.371196	24.3876	1.55319e-38	1.671e-35	77.4529	0.220388	0.522005	0.301617	15	40074526	F	II	FSIP1	5'UTR	shore	5'UTR-shore	chr15:40074645-40075188	NA	NA
cg07462756	-0.415646	0.418812	-24.3746	1.61205e-38	1.7297e-35	77.416	0.626635	0.210988	-0.415646	4	4859985	R	II	MSX1	TSS1500	island	TSS1500-island	chr4:4859632-4860191	NA	NA
cg00157572	-0.449756	0.49308	-24.3728	1.62023e-38	1.73386e-35	77.411	0.717958	0.268202	-0.449756	14	60977961	F	II	SIX6	Body	island	Body-island	chr14:60975732-60978180	NA	NA
cg12597389	-0.370046	0.341573	-24.36	1.68102e-38	1.78939e-35	77.3745	0.526595	0.15655	-0.370046	7	8482235	R	I	NXPH1	Body	island	Body-island	chr7:8481974-8482762	NA	NA
cg02650767	0.368346	0.539438	24.3436	1.76196e-38	1.86078e-35	77.3279	0.355265	0.723611	0.368346	1	247615210	F	II	OR2B11	1stExon	shore	1stExon-shore	chr1:247614695-247614944	NA	NA		rs12028142
cg10366797	-0.279476	0.697759	-24.3071	1.95655e-38	2.03315e-35	77.2241	0.837498	0.558021	-0.279476	12	54441509	F	II	HOXC4	5'UTR	island	5'UTR-island	chr12:54440642-54441543	NA	NA		rs80252816
cg07820868	-0.430137	0.512526	-24.3043	1.97255e-38	2.04034e-35	77.216	0.727594	0.297457	-0.430137	1	119528638	F	II	TBX15	5'UTR	shore	5'UTR-shore	chr1:119529819-119530712	NA	NA
cg08337166	0.352835	0.57337	24.2784	2.12502e-38	2.18123e-35	77.1422	0.396952	0.749788	0.352835	12	108686134	F	II	CMKLR1	Body	opensea	Body-opensea		NA	NA
cg04521004	-0.48818	0.500127	-24.2749	2.14639e-38	2.19756e-35	77.1323	0.744217	0.256037	-0.48818	3	157821262	R	II	SHOX2	Body	island	Body-island	chr3:157821232-157821604	NA	NA
cg08726667	-0.376872	0.658515	-24.2564	2.26407e-38	2.30636e-35	77.0794	0.846951	0.470079	-0.376872	16	28573379	R	II	CCDC101	5'UTR	opensea	5'UTR-opensea		NA	TRUE
cg04021697	-0.501531	0.319207	-24.2521	2.29184e-38	2.3287e-35	77.0673	0.569972	0.0684418	-0.501531	1	3567303	R	I	WDR8	TSS1500	island	TSS1500-island	chr1:3566445-3569636	NA	NA
cg13645481	0.338305	0.486981	24.246	2.33248e-38	2.36402e-35	77.0498	0.317829	0.656134	0.338305	19	56369522	F	I	NLRP4	Body	island	Body-island	chr19:56369415-56369669	NA	NA
cg17526483	-0.316713	0.585354	-24.239	2.37977e-38	2.4059e-35	77.0299	0.743711	0.426997	-0.316713	7	27281404	R	II	EVX1	TSS1500	shore	TSS1500-shore	chr7:27282086-27283136	NA	TRUE
cg18675097	-0.415222	0.527735	-24.2202	2.51249e-38	2.5337e-35	76.9761	0.735346	0.320124	-0.415222	6	28227127	F	I	NKAPL	5'UTR	island	5'UTR-island	chr6:28226979-28227483	NA	NA		rs41269289
cg07094847	-0.361653	0.736499	-24.2159	2.54388e-38	2.55895e-35	76.9638	0.917326	0.555673	-0.361653	7	27160586	F	II	HOXA3	5'UTR	shore	5'UTR-shore	chr7:27162087-27162426	NA	NA
cg15672768	-0.377067	0.450336	-24.2129	2.56617e-38	2.57493e-35	76.9552	0.638869	0.261802	-0.377067	5	140741220	R	I	PCDHGA4	Body	island	Body-island	chr5:140741174-140741738	NA	NA
cg20014398	-0.508922	0.409431	-24.21	2.58729e-38	2.58966e-35	76.9471	0.663892	0.154971	-0.508922	11	31825792	R	I	PAX6	Body	island	Body-island	chr11:31825743-31826967	NA	NA
cg01978237	-0.469233	0.486693	-24.2043	2.63028e-38	2.62617e-35	76.9307	0.721309	0.252076	-0.469233	6	100896803	F	II	SIM1	Body	shore	Body-shore	chr6:100897080-100897621	NA	NA
cg15618978	-0.403448	0.42731	-24.1937	2.71167e-38	2.69818e-35	76.9005	0.629034	0.225586	-0.403448	3	160167990	F	I	TRIM59	TSS1500	island	TSS1500-island	chr3:160167184-160168200	NA	NA
cg09173768	-0.453856	0.474721	-24.1829	2.79791e-38	2.76608e-35	76.8695	0.701648	0.247793	-0.453856	2	176989349	R	I	HOXD9	3'UTR	island	3'UTR-island	chr2:176989337-176989587	NA	NA
cg25021051	0.305244	0.243695	24.1498	3.07829e-38	3.03581e-35	76.7748	0.0910728	0.396317	0.305244	12	53448178	F	II	TENC1	Body	island	Body-island	chr12:53448008-53448406	NA	NA	high-CpG:51734434-51734495
cg17029193	-0.318268	0.720261	-24.1332	3.22975e-38	3.17738e-35	76.7272	0.879395	0.561127	-0.318268	1	8510607	R	I	RERE	Body	opensea	Body-opensea		NA	TRUE		rs301813
cg18849102	-0.325236	0.461155	-24.1225	3.33042e-38	3.26048e-35	76.6967	0.623773	0.298537	-0.325236	4	4859935	R	II	MSX1	TSS1500	island	TSS1500-island	chr4:4859632-4860191	NA	NA
cg14216068	-0.427057	0.623828	-24.1211	3.34458e-38	3.2664e-35	76.6925	0.837356	0.4103	-0.427057	7	27146445	F	I	HOXA3	3'UTR	island	3'UTR-island	chr7:27146069-27146600	TRUE	NA			rs41311635
cg15811515	-0.589482	0.408209	-24.1082	3.47157e-38	3.38221e-35	76.6556	0.70295	0.113468	-0.589482	16	31580989	F	I	CSDAP1	TSS200	island	TSS200-island	chr16:31580559-31581023	NA	NA
cg02174232	0.254921	0.191576	24.1052	3.50114e-38	3.40278e-35	76.6472	0.0641151	0.319037	0.254921	3	49712164	F	II	APEH	Body	island	Body-island	chr3:49710968-49712279	NA	NA
cg02803819	-0.437634	0.563063	-24.1041	3.51251e-38	3.40561e-35	76.644	0.78188	0.344247	-0.437634	7	27141067	F	I	HOXA2	Body	shelf	Body-shelf	chr7:27143181-27143479	NA	TRUE
cg13019491	-0.482133	0.331096	-24.0846	3.71659e-38	3.58619e-35	76.588	0.572162	0.0900293	-0.482133	14	60977856	R	I	SIX6	Body	island	Body-island	chr14:60975732-60978180	NA	NA
cg23965720	0.278586	0.24231	24.0782	3.7864e-38	3.64481e-35	76.5695	0.103017	0.381603	0.278586	1	235805770	F	II	GNG4	5'UTR	island	5'UTR-island	chr1:235805318-235805771	NA	NA
cg00097146	-0.480085	0.31253	-24.0763	3.80661e-38	3.65552e-35	76.5642	0.552573	0.072488	-0.480085	2	45171818	F	I	SIX3	Body	island	Body-island	chr2:45169505-45171884	TRUE	NA		rs338074
cg22203219	-0.423889	0.445674	-24.0518	4.08638e-38	3.90554e-35	76.4939	0.657618	0.233729	-0.423889	12	6665335	F	II	IFFO1	TSS200	island	TSS200-island	chr12:6664425-6665336	NA	NA
cg24702069	0.499365	0.450748	24.0181	4.50668e-38	4.28688e-35	76.3969	0.201066	0.700431	0.499365	13	109352806	R	II	MYO16	Body	opensea	Body-opensea		NA	NA
cg01708273	-0.454538	0.418799	-24.0058	4.66955e-38	4.41052e-35	76.3616	0.646069	0.19153	-0.454538	2	176974060	F	I	HOXD11	3'UTR	shore	3'UTR-shore	chr2:176971706-176972305	NA	NA		rs863678
cg19212949	0.496655	0.515369	24.0024	4.71653e-38	4.44446e-35	76.3517	0.267042	0.763697	0.496655	19	57323840	F	I	PEG3	3'UTR	opensea	3'UTR-opensea		NA	NA		rs45600540
cg25742464	0.246066	0.256253	23.9837	4.97982e-38	4.65983e-35	76.2979	0.13322	0.379286	0.246066	1	201978971	R	II	ELF3	TSS1500	opensea	TSS1500-opensea		TRUE	TRUE			rs61821544
cg04556126	-0.505138	0.524845	-23.9808	5.02147e-38	4.67705e-35	76.2896	0.777414	0.272276	-0.505138	3	147106561	R	II	ZIC4	3'UTR	shore	3'UTR-shore	chr3:147108511-147111703	NA	NA
cg08203284	-0.243442	0.760915	-23.9771	5.0751e-38	4.71128e-35	76.2791	0.882636	0.639194	-0.243442	7	27171528	F	I	HOXA4	TSS1500	shore	TSS1500-shore	chr7:27169572-27170638	NA	NA		rs17471471
cg07892597	-0.337363	0.586451	-23.973	5.13598e-38	4.72897e-35	76.2672	0.755132	0.41777	-0.337363	1	119532093	F	II	TBX15	1stExon	island	1stExon-island	chr1:119531991-119532196	NA	TRUE		rs75552845	rs75870087
cg26099134	-0.285088	0.369031	-23.9557	5.40102e-38	4.96165e-35	76.2173	0.511575	0.226486	-0.285088	6	100897309	F	I	SIM1	Body	island	Body-island	chr6:100897080-100897621	NA	NA
cg27032232	-0.47687	0.379672	-23.9489	5.50867e-38	5.03754e-35	76.1978	0.618107	0.141237	-0.47687	7	153584609	R	I	DPP6	1stExon	island	1stExon-island	chr7:153583317-153585666	NA	NA
cg02443967	0.37712	0.785155	23.9296	5.82727e-38	5.30478e-35	76.142	0.596595	0.973715	0.37712	10	98129902	R	I	TLL2	Body	opensea	Body-opensea		NA	NA
cg07714812	-0.254511	0.687907	-23.9176	6.03303e-38	5.45511e-35	76.1076	0.815162	0.560651	-0.254511	6	1635611	F	I	GMDS	Body	opensea	Body-opensea		NA	NA
cg05802386	0.47395	0.632543	23.9042	6.27389e-38	5.66013e-35	76.0688	0.395568	0.869518	0.47395	1	43422920	F	II	SLC2A1	Body	shore	Body-shore	chr1:43423467-43424768	NA	NA
cg08438705	-0.227862	0.813103	-23.8882	6.57349e-38	5.90395e-35	76.0225	0.927035	0.699172	-0.227862	19	1152189	F	I	SBNO2	Body	island	Body-island	chr19:1152015-1152249	TRUE	NA
cg07676145	-0.429689	0.568702	-23.8846	6.64195e-38	5.93892e-35	76.0122	0.783547	0.353858	-0.429689	10	73506646	F	II	CDH23	Body	opensea	Body-opensea		NA	TRUE
cg18501555	-0.463396	0.396476	-23.8823	6.68744e-38	5.96634e-35	76.0055	0.628174	0.164777	-0.463396	4	111554966	R	II	PITX2	5'UTR	island	5'UTR-island	chr4:111554965-111555504	NA	NA
cg04692403	-0.373675	0.465298	-23.8494	7.35999e-38	6.55184e-35	75.9104	0.652135	0.27846	-0.373675	6	134210812	F	II	TCF21	1stExon	island	1stExon-island	chr6:134210639-134211218	TRUE	NA
cg07180538	-0.277768	0.810824	-23.8384	7.59933e-38	6.74772e-35	75.8787	0.949708	0.67194	-0.277768	7	4786899	R	I	FOXK1	Body	island	Body-island	chr7:4786761-4786987	NA	NA
cg01911239	-0.298967	0.576322	-23.8378	7.61357e-38	6.74772e-35	75.8768	0.725806	0.426838	-0.298967	5	140744076	R	II	PCDHGA4	Body	island	Body-island	chr5:140743961-140744642	NA	NA
cg04105511	-0.507911	0.462717	-23.8321	7.74079e-38	6.8454e-35	75.8604	0.716672	0.208761	-0.507911	12	54409207	R	II	HOXC4	TSS1500	shore	TSS1500-shore	chr12:54408426-54408713	NA	NA
cg05167251	-0.477134	0.354733	-23.8143	8.15249e-38	7.17522e-35	75.809	0.5933	0.116166	-0.477134	2	176987465	R	I	HOXD9	5'UTR	island	5'UTR-island	chr2:176986424-176988291	TRUE	TRUE	high-CpG:176695692-176695717
cg07788369	-0.485466	0.402215	-23.7802	9.00643e-38	7.86097e-35	75.7102	0.644949	0.159482	-0.485466	7	96619068	F	I	DLX6AS	Body	opensea	Body-opensea		NA	TRUE		rs34413484
cg02597246	-0.280535	0.69298	-23.7769	9.09361e-38	7.91988e-35	75.7006	0.833248	0.552713	-0.280535	16	81711959	F	I	CMIP	Body	island	Body-island	chr16:81711864-81712214	NA	NA
cg21497990	-0.420205	0.318325	-23.7648	9.42149e-38	8.18772e-35	75.6655	0.528427	0.108222	-0.420205	7	155255122	F	I	EN2	Body	island	Body-island	chr7:155255098-155255311	NA	NA		rs75103128
cg03946762	0.330821	0.236093	23.7498	9.84519e-38	8.51914e-35	75.6219	0.0706825	0.401503	0.330821	12	54785043	R	II	ZNF385A	5'UTR	island	5'UTR-island	chr12:54784900-54785238	NA	NA	high-CpG:53071285-53071425
cg05088898	-0.472948	0.472305	-23.7333	1.03291e-37	8.88058e-35	75.5743	0.708779	0.235831	-0.472948	10	120489294	F	II	C10orf46	Body	opensea	Body-opensea		NA	NA
cg19693031	-0.381519	0.731253	-23.7254	1.05718e-37	9.06985e-35	75.5512	0.922012	0.540494	-0.381519	1	145441552	F	II	TXNIP	3'UTR	opensea	3'UTR-opensea		NA	NA
cg15540820	-0.490283	0.411791	-23.716	1.08657e-37	9.30221e-35	75.524	0.656932	0.166649	-0.490283	3	27765283	F	II	EOMES	TSS1500	island	TSS1500-island	chr3:27765196-27765675	NA	NA		rs72537449
cg07937271	-0.420148	0.473317	-23.7125	1.09781e-37	9.37843e-35	75.5138	0.68339	0.263243	-0.420148	4	13542719	R	II	NKX3-2	3'UTR	shore	3'UTR-shore	chr4:13543562-13546494	NA	TRUE
cg10660256	-0.429128	0.451046	-23.7044	1.12428e-37	9.58423e-35	75.4902	0.66561	0.236483	-0.429128	5	78407683	F	II	BHMT	5'UTR	opensea	5'UTR-opensea		NA	TRUE		rs1050824
cg07536910	-0.49904	0.375903	-23.6963	1.15134e-37	9.79416e-35	75.4666	0.625422	0.126383	-0.49904	2	176948105	R	I	EVX2	1stExon	island	1stExon-island	chr2:176944087-176948446	NA	NA
cg23467079	-0.263716	0.675138	-23.6925	1.164e-37	9.88092e-35	75.4558	0.806996	0.54328	-0.263716	8	124219425	F	I	FAM83A	Body	island	Body-island	chr8:124219411-124219809	NA	NA		rs56221642
cg10707788	-0.285071	0.785524	-23.6783	1.21357e-37	1.02584e-34	75.4144	0.92806	0.642989	-0.285071	6	1635847	R	I	GMDS	Body	opensea	Body-opensea		NA	NA
cg02286008	-0.265981	0.744795	-23.6583	1.28685e-37	1.08551e-34	75.3562	0.877785	0.611805	-0.265981	16	30133247	R	I	MAPK3	Body	shore	Body-shore	chr16:30134220-30134488	NA	NA
cg19588399	0.234173	0.230345	23.6346	1.37968e-37	1.15655e-34	75.2871	0.113258	0.347431	0.234173	1	27668445	F	I	SYTL1	TSS200	opensea	TSS200-opensea		TRUE	TRUE
cg23290344	-0.451574	0.303004	-23.6252	1.41821e-37	1.18391e-34	75.2598	0.528791	0.0772163	-0.451574	8	24771466	F	I	NEFM	TSS1500	island	TSS1500-island	chr8:24770908-24772547	TRUE	NA
cg13240116	-0.253724	0.730181	-23.6123	1.47309e-37	1.22464e-34	75.2221	0.857043	0.603319	-0.253724	7	27147513	F	II	HOXA3	3'UTR	shore	3'UTR-shore	chr7:27147589-27148389	NA	NA
cg08363794	-0.419642	0.487577	-23.5931	1.55844e-37	1.29292e-34	75.1663	0.697398	0.277756	-0.419642	2	176986460	R	II	HOXD9	TSS1500	island	TSS1500-island	chr2:176986424-176988291	NA	NA
cg21487856	-0.328022	0.714038	-23.5905	1.57032e-37	1.3001e-34	75.1587	0.878049	0.550027	-0.328022	2	54828502	R	II	SPTBN1	Body	opensea	Body-opensea		NA	TRUE
cg07641807	0.324455	0.301974	23.5678	1.67882e-37	1.38424e-34	75.0924	0.139747	0.464202	0.324455	13	92001959	F	II	MIR19A	TSS1500	shore	TSS1500-shore	chr13:91999541-92001441	NA	NA
cg10395685	-0.557599	0.369873	-23.5497	1.77084e-37	1.45414e-34	75.0395	0.648672	0.0910734	-0.557599	11	86085715	R	II	CCDC81	TSS200	island	TSS200-island	chr11:86085693-86086006	NA	TRUE
cg03276000	0.435945	0.656028	23.5437	1.80232e-37	1.47698e-34	75.022	0.438056	0.874	0.435945	7	154087975	F	II	DPP6	Body	opensea	Body-opensea		NA	NA
cg10122865	-0.530054	0.404396	-23.5306	1.87295e-37	1.52554e-34	74.9839	0.669423	0.139369	-0.530054	2	63284132	F	I	OTX1	3'UTR	island	3'UTR-island	chr2:63283936-63284147	NA	TRUE
cg19757573	0.487787	0.547885	23.5132	1.97157e-37	1.5994e-34	74.9329	0.303991	0.791778	0.487787	14	101506246	R	I	MIR654	TSS1500	opensea	TSS1500-opensea		NA	NA
cg05465955	0.422868	0.56883	23.4987	2.05771e-37	1.66592e-34	74.8905	0.357396	0.780264	0.422868	17	40715236	F	I	COASY	1stExon	island	1stExon-island	chr17:40714087-40715282	NA	NA	low-CpG:37968723-37968775
cg22967396	-0.449867	0.385679	-23.49	2.11139e-37	1.70594e-34	74.865	0.610612	0.160745	-0.449867	14	57283942	F	II	OTX2OS1	Body	shore	Body-shore	chr14:57283967-57284558	NA	NA		rs2274793
cg00336320	-0.330211	0.310922	-23.4864	2.13363e-37	1.72045e-34	74.8546	0.476027	0.145816	-0.330211	6	36253099	F	I	PNPLA1	5'UTR	opensea	5'UTR-opensea		NA	NA		rs77449948
cg08381537	-0.273494	0.773325	-23.4839	2.14963e-37	1.72451e-34	74.8472	0.910072	0.636578	-0.273494	19	310296	F	I	MIER2	Body	island	Body-island	chr19:310258-310582	TRUE	NA
cg10734581	0.30566	0.507699	23.4836	2.15152e-37	1.72451e-34	74.8463	0.354869	0.660529	0.30566	14	101520078	F	II	MIR134	TSS1500	opensea	TSS1500-opensea		NA	NA
cg15092343	-0.455705	0.377133	-23.4485	2.38626e-37	1.90886e-34	74.7435	0.604985	0.14928	-0.455705	4	4860061	F	I	MSX1	TSS1500	island	TSS1500-island	chr4:4859632-4860191	NA	NA		rs76561716
cg21472506	-0.542496	0.35346	-23.4447	2.41315e-37	1.92654e-34	74.7324	0.624708	0.0822123	-0.542496	2	63283967	F	I	OTX1	3'UTR	island	3'UTR-island	chr2:63283936-63284147	NA	TRUE
cg06786372	-0.392585	0.687436	-23.4329	2.49852e-37	1.98681e-34	74.6979	0.883729	0.491144	-0.392585	7	27141388	R	II	HOXA2	Body	shore	Body-shore	chr7:27143181-27143479	NA	TRUE
cg27364741	-0.471543	0.378838	-23.4292	2.52618e-37	2.00368e-34	74.687	0.61461	0.143067	-0.471543	2	63281069	R	I	OTX1	Body	island	Body-island	chr2:63281034-63281347	NA	NA
cg16509777	-0.441128	0.484338	-23.4287	2.52969e-37	2.00368e-34	74.6856	0.704902	0.263774	-0.441128	2	45172265	R	II	SIX3	3'UTR	shore	3'UTR-shore	chr2:45169505-45171884	NA	NA			rs10204281
cg05722504	-0.297665	0.533355	-23.4207	2.59021e-37	2.04357e-34	74.6622	0.682187	0.384522	-0.297665	4	41749361	F	II	PHOX2B	Body	island	Body-island	chr4:41749184-41749811	NA	TRUE		rs28939716
cg08465346	-0.442848	0.450873	-23.4167	2.62139e-37	2.05608e-34	74.6503	0.672297	0.229449	-0.442848	12	54441458	R	I	HOXC4	5'UTR	island	5'UTR-island	chr12:54440642-54441543	NA	NA
cg24469729	-0.381599	0.652112	-23.3938	2.80493e-37	2.18301e-34	74.5831	0.842911	0.461312	-0.381599	7	27160520	R	II	HOXA3	5'UTR	shore	5'UTR-shore	chr7:27162087-27162426	NA	NA
cg12670347	-0.379568	0.39968	-23.3899	2.83735e-37	2.20398e-34	74.5717	0.589464	0.209896	-0.379568	12	114847578	R	I	TBX5	TSS1500	island	TSS1500-island	chr12:114845861-114847650	NA	NA
cg27252696	-0.510579	0.349222	-23.3579	3.11995e-37	2.41417e-34	74.4775	0.604512	0.0939326	-0.510579	6	100912940	R	I	SIM1	TSS1500	island	TSS1500-island	chr6:100912071-100913337	TRUE	NA
cg25649765	0.536174	0.549494	23.3567	3.13095e-37	2.41804e-34	74.474	0.281407	0.817581	0.536174	2	11672761	F	II	GREB1	TSS1500	opensea	TSS1500-opensea		TRUE	NA
cg03379681	-0.397945	0.612299	-23.3512	3.18211e-37	2.45284e-34	74.4579	0.811272	0.413327	-0.397945	3	151058527	F	II	P2RY12	1stExon	opensea	1stExon-opensea		NA	NA
cg16703762	-0.38719	0.559778	-23.3411	3.279e-37	2.52269e-34	74.4282	0.753373	0.366183	-0.38719	5	76932047	F	II	OTP	Body	shore	Body-shore	chr5:76932317-76933523	NA	NA
cg03195795	-0.244783	0.790969	-23.3386	3.30263e-37	2.53391e-34	74.421	0.913361	0.668578	-0.244783	7	4786768	F	II	FOXK1	Body	island	Body-island	chr7:4786761-4786987	NA	NA
cg09672383	-0.36937	0.584021	-23.3383	3.30617e-37	2.53391e-34	74.42	0.768706	0.399336	-0.36937	2	25390540	R	II	POMC	5'UTR	shore	5'UTR-shore	chr2:25391072-25391875	NA	NA
cg26698460	-0.30606	0.761375	-23.3325	3.36335e-37	2.57283e-34	74.4029	0.914405	0.608345	-0.30606	19	58716004	R	II	ZNF274	Body	island	Body-island	chr19:58715220-58716033	NA	NA
cg09798023	-0.354831	0.7158	-23.3288	3.40007e-37	2.59107e-34	74.3922	0.893215	0.538384	-0.354831	7	27161624	F	II	HOXA3	5'UTR	shore	5'UTR-shore	chr7:27162087-27162426	NA	NA		rs75365262
cg23369670	-0.418436	0.606018	-23.3273	3.41533e-37	2.59778e-34	74.3877	0.815236	0.3968	-0.418436	14	104171944	R	II	XRCC3	Body	opensea	Body-opensea		NA	NA
cg07547765	-0.332559	0.73889	-23.3164	3.52808e-37	2.67847e-34	74.3555	0.905169	0.57261	-0.332559	17	46685448	F	II	HOXB7	Body	island	Body-island	chr17:46685244-46685449	NA	NA
cg11174855	-0.433099	0.355933	-23.3139	3.5542e-37	2.69322e-34	74.3482	0.572482	0.139383	-0.433099	10	134598352	R	I	NKX6-2	3'UTR	island	3'UTR-island	chr10:134597357-134602649	NA	NA
cg10709593	-0.435238	0.370099	-23.2956	3.75221e-37	2.83259e-34	74.2944	0.587718	0.152481	-0.435238	2	172952883	F	I	DLX1	Body	island	Body-island	chr2:172952809-172953160	NA	NA
cg12250807	-0.307471	0.74615	-23.2446	4.36636e-37	3.27777e-34	74.1439	0.899886	0.592415	-0.307471	2	136598602	R	II	MCM6	Body	opensea	Body-opensea		NA	TRUE
cg16758800	-0.396493	0.5157	-23.2379	4.45384e-37	3.33102e-34	74.1242	0.713946	0.317454	-0.396493	7	96631902	R	II	DLX6AS	Body	shore	Body-shore	chr7:96631383-96631800	NA	NA
cg10933003	-0.306929	0.643238	-23.2318	4.53536e-37	3.38569e-34	74.1062	0.796702	0.489773	-0.306929	4	174448341	R	II	HAND2	3'UTR	island	3'UTR-island	chr4:174448333-174448845	NA	NA
cg22352800	-0.424965	0.60769	-23.2305	4.55302e-37	3.39258e-34	74.1024	0.820172	0.395207	-0.424965	2	177014467	R	II	MIR10B	TSS1500	shore	TSS1500-shore	chr2:177014948-177015214	NA	NA
cg04907244	0.420295	0.304765	23.2296	4.56515e-37	3.39533e-34	74.0997	0.0946172	0.514912	0.420295	7	22894795	F	II	SNORD93	TSS1500	shore	TSS1500-shore	chr7:22893794-22894577	NA	NA
cg20140940	0.428457	0.591082	23.2172	4.73608e-37	3.50949e-34	74.0632	0.376853	0.80531	0.428457	1	241390013	R	II	RGS7	Body	opensea	Body-opensea		NA	TRUE
cg17157798	0.410311	0.697484	23.2078	4.87077e-37	3.58947e-34	74.0354	0.492329	0.90264	0.410311	12	129595394	F	II	TMEM132D	Body	opensea	Body-opensea		NA	NA		rs76610610
cg23677657	-0.372998	0.618291	-23.2026	4.94707e-37	3.63238e-34	74.02	0.80479	0.431792	-0.372998	7	96619076	F	II	DLX6AS	Body	opensea	Body-opensea		NA	TRUE		rs34413484
cg06552160	0.448876	0.629391	23.1999	4.98742e-37	3.65534e-34	74.0119	0.404953	0.853829	0.448876	2	1926724	R	II	MYT1L	Body	opensea	Body-opensea		NA	NA	low-CpG:1905605-1905922
cg17942121	-0.441095	0.402772	-23.1888	5.15426e-37	3.76391e-34	73.9793	0.623319	0.182224	-0.441095	6	100911964	F	II	SIM1	TSS1500	shore	TSS1500-shore	chr6:100912071-100913337	TRUE	TRUE
cg03760839	-0.299736	0.647185	-23.1805	5.28426e-37	3.85185e-34	73.9545	0.797054	0.497317	-0.299736	1	119531718	F	II	TBX15	5'UTR	shore	5'UTR-shore	chr1:119531991-119532196	NA	TRUE		rs12035818
cg22561329	0.245156	0.412432	23.1757	5.35967e-37	3.89975e-34	73.9405	0.289853	0.53501	0.245156	19	57346735	R	II	PEG3	5'UTR	shelf	5'UTR-shelf	chr19:57349997-57350470	NA	NA
cg03169557	-0.267485	0.80503	-23.1634	5.55947e-37	4.03056e-34	73.9041	0.938772	0.671287	-0.267485	16	89598950	F	I	SPG7	Body	opensea	Body-opensea		NA	NA
cg24023258	0.333943	0.273016	23.1584	5.64296e-37	4.08373e-34	73.8893	0.106044	0.439987	0.333943	8	143781297	F	II	LY6K	TSS1500	shore	TSS1500-shore	chr8:143781581-143782609	TRUE	TRUE
cg15300436	0.456206	0.51608	23.1482	5.81695e-37	4.18705e-34	73.8592	0.287976	0.744183	0.456206	2	2321788	F	I	LOC730811	TSS1500	opensea	TSS1500-opensea		NA	NA
cg26959655	-0.418314	0.606078	-23.1354	6.04408e-37	4.33503e-34	73.8212	0.815235	0.396921	-0.418314	8	103379529	R	II	UBR5	Body	opensea	Body-opensea		NA	TRUE
cg23817893	-0.451547	0.351192	-23.1054	6.61066e-37	4.69952e-34	73.7322	0.576965	0.125418	-0.451547	11	86085932	R	I	CCDC81	1stExon	island	1stExon-island	chr11:86085693-86086006	NA	TRUE
cg13916459	-0.439517	0.419172	-23.099	6.73687e-37	4.78079e-34	73.7135	0.638931	0.199414	-0.439517	12	85673221	F	I	ALX1	TSS1500	shore	TSS1500-shore	chr12:85673878-85674700	NA	NA
cg11128216	-0.509422	0.493383	-23.0871	6.98104e-37	4.92799e-34	73.6781	0.748094	0.238672	-0.509422	11	31825833	R	II	PAX6	Body	island	Body-island	chr11:31825743-31826967	NA	NA
cg00983904	-0.446225	0.391022	-23.0855	7.01476e-37	4.94312e-34	73.6733	0.614135	0.167909	-0.446225	12	6665288	R	I	IFFO1	TSS200	island	TSS200-island	chr12:6664425-6665336	NA	NA	high-CpG:6535366-6535558
cg26151467	-0.451041	0.523651	-23.0801	7.12923e-37	5.015e-34	73.6573	0.749171	0.298131	-0.451041	13	112724221	R	II	SOX1	1stExon	shore	1stExon-shore	chr13:112720564-112723582	NA	NA
cg13882284	-0.294342	0.54376	-23.0518	7.75899e-37	5.43899e-34	73.5732	0.690931	0.396589	-0.294342	4	4859996	R	II	MSX1	TSS1500	island	TSS1500-island	chr4:4859632-4860191	NA	NA
cg25136495	-0.498973	0.408926	-23.0339	8.18504e-37	5.71772e-34	73.5202	0.658413	0.15944	-0.498973	12	6729718	R	I	LPAR5	Body	island	Body-island	chr12:6729248-6730310	TRUE	TRUE
cg17083575	-0.322011	0.598379	-22.9924	9.26711e-37	6.44007e-34	73.3969	0.759385	0.437374	-0.322011	7	4746131	F	II	FOXK1	Body	opensea	Body-opensea		NA	TRUE
cg03048654	-0.534199	0.355915	-22.9734	9.81159e-37	6.78471e-34	73.3402	0.623014	0.0888155	-0.534199	10	118893138	R	I	VAX1	3'UTR	shore	3'UTR-shore	chr10:118893527-118894432	NA	NA
cg07212384	0.450478	0.543013	22.9733	9.81364e-37	6.78471e-34	73.34	0.317774	0.768252	0.450478	7	99761053	R	II	GAL3ST4	Body	opensea	Body-opensea		TRUE	NA
cg17323336	0.438718	0.687862	22.9523	1.04536e-36	7.20237e-34	73.2773	0.468503	0.907221	0.438718	8	139441367	F	II	FAM135B	5'UTR	opensea	5'UTR-opensea		NA	TRUE
cg13494348	-0.303289	0.731644	-22.909	1.19035e-36	8.18737e-34	73.1483	0.883288	0.579999	-0.303289	6	170596856	F	II	DLL1	Body	shore	Body-shore	chr6:170597246-170597499	NA	TRUE
cg01081096	0.376099	0.638482	22.8861	1.27513e-36	8.74061e-34	73.08	0.450432	0.826532	0.376099	7	150721518	F	II	ATG9B	1stExon	shelf	1stExon-shelf	chr7:150725173-150726018	NA	NA
cg17588293	-0.309031	0.477839	-22.8852	1.27872e-36	8.75031e-34	73.0772	0.632355	0.323323	-0.309031	1	154986238	F	I	ZBTB7B	5'UTR	shelf	5'UTR-shelf	chr1:154989749-154990234	NA	NA
cg15607672	-0.443351	0.530799	-22.8826	1.28878e-36	8.79049e-34	73.0694	0.752475	0.309123	-0.443351	14	57277227	R	II	OTX2	TSS200	shore	TSS200-shore	chr14:57278068-57278287	NA	NA
cg16290996	0.356896	0.301809	22.8825	1.28896e-36	8.79049e-34	73.0693	0.123361	0.480257	0.356896	1	173835989	R	II	GAS5	Body	shore	Body-shore	chr1:173837172-173837917	NA	NA
cg26668276	-0.540025	0.447613	-22.8633	1.36553e-36	9.29689e-34	73.012	0.717625	0.1776	-0.540025	7	96633311	R	II	DLX6AS	Body	shore	Body-shore	chr7:96634622-96634915	NA	NA
cg05678658	0.371828	0.570188	22.8488	1.42668e-36	9.68047e-34	72.9685	0.384274	0.756102	0.371828	2	1500117	R	II	TPO	Body	opensea	Body-opensea		NA	NA			rs72160813
cg03464573	-0.445724	0.371161	-22.8475	1.43237e-36	9.70274e-34	72.9645	0.594023	0.148299	-0.445724	7	27205504	F	II	HOXA9	TSS1500	island	TSS1500-island	chr7:27203915-27206462	TRUE	NA
cg27616751	-0.214368	0.828631	-22.8315	1.50306e-36	1.01322e-33	72.9167	0.935814	0.721447	-0.214368	7	100883077	F	I	FIS1	3'UTR	opensea	3'UTR-opensea		NA	NA
cg05919685	0.48931	0.501334	22.823	1.54175e-36	1.03392e-33	72.8914	0.256679	0.745989	0.48931	1	159556997	F	II	APCS	TSS1500	opensea	TSS1500-opensea		NA	NA
cg26477856	0.436579	0.611997	22.805	1.62802e-36	1.08815e-33	72.8374	0.393708	0.830286	0.436579	12	56324915	F	II	DGKA	TSS1500	shore	TSS1500-shore	chr12:56325774-56326223	TRUE	NA
cg10745499	-0.359578	0.571828	-22.7942	1.68164e-36	1.12116e-33	72.8052	0.751617	0.392039	-0.359578	6	100906685	F	II	SIM1	Body	island	Body-island	chr6:100905952-100906686	NA	NA
cg08979319	-0.307277	0.471282	-22.7863	1.72249e-36	1.13806e-33	72.7814	0.624921	0.317644	-0.307277	6	100896055	R	I	SIM1	Body	island	Body-island	chr6:100895773-100896062	NA	TRUE			rs71566344
cg12910906	-0.371955	0.424865	-22.7784	1.764e-36	1.16167e-33	72.7577	0.610843	0.238887	-0.371955	2	131673894	F	II	ARHGEF4	TSS1500	island	TSS1500-island	chr2:131673686-131674150	NA	NA
cg07303143	0.29896	0.282951	22.7732	1.79171e-36	1.17799e-33	72.7422	0.133471	0.432431	0.29896	3	44803452	R	II	KIAA1143	TSS1500	island	TSS1500-island	chr3:44802852-44803618	NA	NA
cg16732787	-0.340998	0.681486	-22.726	2.06635e-36	1.34536e-33	72.6006	0.851985	0.510987	-0.340998	1	228785992	R	II	DUSP5P	Body	island	Body-island	chr1:228785986-228786204	NA	NA
cg00348389	-0.230891	0.787886	-22.6988	2.24338e-36	1.45591e-33	72.519	0.903331	0.67244	-0.230891	16	31235706	R	II	TRIM72	Body	island	Body-island	chr16:31235525-31236104	NA	NA
cg01014615	-0.432565	0.567288	-22.6803	2.37252e-36	1.52985e-33	72.4634	0.783571	0.351005	-0.432565	2	177027621	F	II	HOXD3	TSS1500	island	TSS1500-island	chr2:177027617-177028014	NA	NA
cg09340639	0.323799	0.274504	22.6794	2.37936e-36	1.53181e-33	72.4605	0.112605	0.436404	0.323799	1	157789662	R	II	FCRL1	Body	opensea	Body-opensea		NA	NA
cg04739647	-0.418861	0.309667	-22.6745	2.41489e-36	1.55028e-33	72.4458	0.519097	0.100236	-0.418861	2	176987462	R	I	HOXD9	5'UTR	island	5'UTR-island	chr2:176986424-176988291	TRUE	TRUE	high-CpG:176695692-176695717
cg07533239	0.367619	0.328867	22.6741	2.41755e-36	1.55028e-33	72.4447	0.145057	0.512677	0.367619	12	6422131	R	II	PLEKHG6	1stExon	shelf	1stExon-shelf	chr12:6419603-6420024	TRUE	TRUE
cg17916835	-0.429348	0.587147	-22.6687	2.45788e-36	1.5698e-33	72.4283	0.801821	0.372473	-0.429348	7	96655044	R	II	DLX5	TSS1500	shore	TSS1500-shore	chr7:96653467-96654199	NA	NA
cg00503840	-0.322413	0.552078	-22.665	2.48491e-36	1.58455e-33	72.4174	0.713285	0.390872	-0.322413	7	96650509	F	II	DLX5	Body	island	Body-island	chr7:96650221-96651551	NA	NA
cg23320499	-0.445101	0.52608	-22.6598	2.52469e-36	1.60483e-33	72.4016	0.748631	0.30353	-0.445101	12	12659177	R	II	DUSP16	Body	opensea	Body-opensea		TRUE	TRUE
cg13261883	-0.360292	0.644427	-22.6439	2.64912e-36	1.67634e-33	72.3539	0.824573	0.464281	-0.360292	7	3988772	R	I	SDK1	Body	opensea	Body-opensea		NA	TRUE
cg08202494	-0.305898	0.390857	-22.6439	2.64968e-36	1.67634e-33	72.3536	0.543806	0.237908	-0.305898	8	99961545	F	I	OSR2	Body	shore	Body-shore	chr8:99960497-99961438	NA	TRUE		rs76515796
cg22455694	-0.393016	0.428299	-22.6383	2.69501e-36	1.69967e-33	72.3368	0.624807	0.231791	-0.393016	2	176974001	R	II	HOXD11	3'UTR	shore	3'UTR-shore	chr2:176971706-176972305	NA	NA
cg14162940	0.255673	0.204423	22.6336	2.73355e-36	1.72128e-33	72.3227	0.0765869	0.33226	0.255673	20	30605868	F	I	C20orf160	Body	island	Body-island	chr20:30605744-30605970	TRUE	NA
cg05109569	-0.364818	0.706732	-22.6271	2.78766e-36	1.75261e-33	72.3032	0.889142	0.524323	-0.364818	7	27146430	F	II	HOXA3	3'UTR	island	3'UTR-island	chr7:27146069-27146600	TRUE	NA		rs41311635
cg05047401	-0.40957	0.477491	-22.5954	3.06928e-36	1.92066e-33	72.2076	0.682275	0.272706	-0.40957	1	156131213	F	I	SEMA4A	Body	opensea	Body-opensea		TRUE	TRUE
cg09519218	-0.337969	0.572968	-22.5937	3.08501e-36	1.92751e-33	72.2026	0.741953	0.403984	-0.337969	10	126390317	F	II	FAM53B	Body	opensea	Body-opensea		NA	TRUE		rs3842242
cg24887265	-0.487227	0.437019	-22.5863	3.15479e-36	1.96805e-33	72.1803	0.680633	0.193406	-0.487227	2	45233528	R	I	SIX2	Body	shore	Body-shore	chr2:45235511-45237792	NA	NA
cg09537620	-0.406257	0.28911	-22.5823	3.19347e-36	1.98909e-33	72.1682	0.492239	0.0859819	-0.406257	11	31826574	F	I	PAX6	Body	island	Body-island	chr11:31825743-31826967	NA	NA
cg13153865	0.183248	0.167037	22.5584	3.43437e-36	2.13254e-33	72.096	0.0754135	0.258661	0.183248	8	90914101	F	II	OSGIN2	5'UTR	shore	5'UTR-shore	chr8:90914197-90915340	TRUE	NA
cg04540406	0.295826	0.298	22.5518	3.50399e-36	2.17242e-33	72.0761	0.150087	0.445912	0.295826	16	46655675	R	II	SHCBP1	TSS1500	shore	TSS1500-shore	chr16:46655002-46655374	NA	NA
cg26752613	-0.282964	0.694407	-22.5498	3.52566e-36	2.18249e-33	72.0699	0.835889	0.552925	-0.282964	7	30492160	R	I	NOD1	Body	opensea	Body-opensea		NA	NA
cg10061770	-0.350142	0.649401	-22.5398	3.6341e-36	2.24616e-33	72.0398	0.824472	0.474329	-0.350142	16	68366844	R	II	PRMT7	Body	opensea	Body-opensea		NA	TRUE
cg05516390	0.383018	0.302894	22.5322	3.71848e-36	2.29478e-33	72.017	0.111385	0.494404	0.383018	16	73088677	R	II	ZFHX3	5'UTR	shelf	5'UTR-shelf	chr16:73091514-73092395	NA	TRUE			rs77476764
cg02952918	-0.294374	0.762039	-22.526	3.78969e-36	2.33515e-33	71.9982	0.909226	0.614852	-0.294374	12	120173011	F	I	CIT	Body	opensea	Body-opensea		NA	NA
cg10469791	0.357633	0.483505	22.5192	3.86877e-36	2.38023e-33	71.9777	0.304689	0.662322	0.357633	4	42895240	F	II	GRXCR1	TSS200	opensea	TSS200-opensea		NA	NA
cg09639151	-0.375008	0.41103	-22.5126	3.94784e-36	2.42518e-33	71.9576	0.598534	0.223526	-0.375008	5	140810920	R	I	PCDHGA4	Body	island	Body-island	chr5:140810494-140812617	NA	NA
cg03752977	0.428562	0.592388	22.4948	4.16683e-36	2.5558e-33	71.904	0.378107	0.806669	0.428562	8	144330404	F	II	ZFP41	5'UTR	shore	5'UTR-shore	chr8:144332365-144332743	NA	NA		rs7837756
cg20239391	-0.320313	0.693325	-22.4861	4.2797e-36	2.61705e-33	71.8774	0.853482	0.533169	-0.320313	20	45030732	R	II	ELMO2	5'UTR	shelf	5'UTR-shelf	chr20:45034723-45035418	NA	TRUE
cg23832497	0.310773	0.257526	22.4849	4.2946e-36	2.62218e-33	71.8739	0.102139	0.412913	0.310773	6	121655383	R	II	C6orf170	Body	shore	Body-shore	chr6:121655615-121656022	NA	TRUE
cg25825506	-0.542301	0.412376	-22.4568	4.67916e-36	2.84834e-33	71.7887	0.683527	0.141225	-0.542301	7	96626659	R	II	DLX6AS	Body	opensea	Body-opensea		NA	NA
cg05369926	-0.31997	0.598788	-22.455	4.70451e-36	2.85944e-33	71.7834	0.758773	0.438803	-0.31997	17	79057147	F	I	BAIAP2	Body	opensea	Body-opensea		TRUE	NA
cg24313303	-0.52596	0.382999	-22.4516	4.75423e-36	2.88277e-33	71.7729	0.645979	0.120019	-0.52596	1	27113219	F	II	PIGV	TSS1500	shore	TSS1500-shore	chr1:27114118-27114692	NA	NA
cg07092525	-0.50775	0.307775	-22.4416	4.90037e-36	2.96059e-33	71.7429	0.56165	0.0538998	-0.50775	8	38008386	R	II	STAR	5'UTR	opensea	5'UTR-opensea		NA	NA
cg20000220	0.407909	0.67508	22.4409	4.91108e-36	2.96262e-33	71.7407	0.471126	0.879035	0.407909	8	144800997	R	I	MAPK15	Body	island	Body-island	chr8:144800957-144801335	NA	NA
cg16104915	-0.398136	0.25154	-22.4245	5.16436e-36	3.11074e-33	71.6907	0.450609	0.0524722	-0.398136	7	27205217	F	I	HOXA9	TSS200	island	TSS200-island	chr7:27203915-27206462	TRUE	NA
cg11275487	-0.204854	0.805368	-22.422	5.20296e-36	3.12109e-33	71.6833	0.907795	0.702942	-0.204854	5	37836119	F	II	GDNF	TSS1500	shore	TSS1500-shore	chr5:37836747-37840726	NA	NA		rs2735274
cg15874877	-0.230903	0.758804	-22.4219	5.2048e-36	3.12109e-33	71.683	0.874256	0.643353	-0.230903	5	140799572	F	II	PCDHGA4	Body	shore	Body-shore	chr5:140800760-140801072	NA	NA
cg06809252	-0.517418	0.410073	-22.4193	5.2467e-36	3.14153e-33	71.675	0.668782	0.151364	-0.517418	1	110612044	R	I	ALX3	Body	island	Body-island	chr1:110610265-110613303	NA	NA
cg23588121	-0.254156	0.694183	-22.4132	5.34532e-36	3.19583e-33	71.6565	0.821261	0.567105	-0.254156	6	100905038	R	II	SIM1	Body	shore	Body-shore	chr6:100905444-100905697	NA	NA
cg15199678	-0.52629	0.432375	-22.4066	5.45434e-36	3.25617e-33	71.6365	0.69552	0.16923	-0.52629	7	96642510	R	II	DLX6AS	Body	shelf	Body-shelf	chr7:96645786-96646599	NA	NA
cg20632143	-0.448185	0.445711	-22.3917	5.70822e-36	3.40268e-33	71.5913	0.669803	0.221618	-0.448185	12	51415652	F	II	SLC11A2	5'UTR	shelf	5'UTR-shelf	chr12:51419640-51420347	NA	NA
cg09174162	-0.188367	0.697988	-22.3894	5.74731e-36	3.42091e-33	71.5845	0.792172	0.603805	-0.188367	7	2150845	F	I	MAD1L1	Body	shelf	Body-shelf	chr7:2154677-2155252	NA	NA
cg15084543	-0.44025	0.54153	-22.388	5.77259e-36	3.42583e-33	71.5801	0.761655	0.321405	-0.44025	1	79472408	R	I	ELTD1	5'UTR	island	5'UTR-island	chr1:79472281-79472537	NA	TRUE
cg14511698	-0.452487	0.45992	-22.3791	5.93257e-36	3.51042e-33	71.553	0.686164	0.233677	-0.452487	14	60976898	F	II	SIX6	Body	island	Body-island	chr14:60975732-60978180	NA	NA		rs77156995
cg01670876	0.400899	0.66647	22.3672	6.15075e-36	3.63417e-33	71.5171	0.46602	0.86692	0.400899	14	74891361	R	II	TMEM90A	5'UTR	shore	5'UTR-shore	chr14:74892466-74893184	NA	NA
cg17241776	-0.480534	0.360617	-22.3541	6.40367e-36	3.77253e-33	71.477	0.600884	0.12035	-0.480534	13	51417469	F	I	DLEU7	1stExon	island	1stExon-island	chr13:51417371-51418149	NA	NA
cg25901381	-0.508396	0.347952	-22.3477	6.53079e-36	3.8418e-33	71.4575	0.60215	0.0937545	-0.508396	7	27225485	R	II	HOXA11AS	Body	island	Body-island	chr7:27225050-27225629	NA	NA
cg12364786	-0.352451	0.716315	-22.3457	6.57045e-36	3.85565e-33	71.4515	0.89254	0.54009	-0.352451	15	64056664	F	II	HERC1	Body	opensea	Body-opensea		NA	TRUE
cg19320820	-0.463958	0.457418	-22.3455	6.57351e-36	3.85565e-33	71.451	0.689397	0.225439	-0.463958	4	87966326	F	I	AFF1	Body	opensea	Body-opensea		NA	TRUE		rs79002023	rs80021868
cg11053466	0.402557	0.63777	22.344	6.60332e-36	3.8675e-33	71.4465	0.436492	0.839049	0.402557	12	6648770	R	II	IFFO1	3'UTR	shore	3'UTR-shore	chr12:6649677-6649897	NA	NA
cg19060371	0.425849	0.341173	22.3318	6.85533e-36	3.98608e-33	71.4093	0.128249	0.554098	0.425849	13	46742722	F	II	LCP1	5'UTR	opensea	5'UTR-opensea		NA	NA		rs41284159
cg16928066	-0.2852	0.352875	-22.3299	6.89635e-36	3.99527e-33	71.4034	0.495475	0.210275	-0.2852	2	73147814	R	I	EMX1	Body	island	Body-island	chr2:73143055-73148260	NA	NA	high-CpG:73001320-73001325
cg20841748	-0.218399	0.757098	-22.3296	6.90091e-36	3.99527e-33	71.4027	0.866298	0.647899	-0.218399	17	40838078	F	II	CNTNAP1	Body	shore	Body-shore	chr17:40838849-40839062	NA	NA
cg16620032	0.213397	0.185649	22.327	6.95798e-36	4.02252e-33	71.3945	0.0789503	0.292347	0.213397	19	46097075	R	II	GPR4	5'UTR	shore	5'UTR-shore	chr19:46094334-46095111	NA	NA
cg23752828	0.45896	0.492403	22.317	7.1723e-36	4.13455e-33	71.3644	0.262923	0.721883	0.45896	12	57941309	F	II	DCTN2	TSS1500	shore	TSS1500-shore	chr12:57940563-57940981	NA	NA
cg12600174	-0.48191	0.342357	-22.3121	7.28089e-36	4.19114e-33	71.3495	0.583312	0.101402	-0.48191	7	27205230	F	I	HOXA9	TSS200	island	TSS200-island	chr7:27203915-27206462	TRUE	NA
cg26626251	0.442698	0.553361	22.3112	7.30255e-36	4.1976e-33	71.3465	0.332012	0.77471	0.442698	11	132948177	R	I	OPCML	Body	shelf	Body-shelf	chr11:132951692-132952260	NA	NA
cg18372607	-0.49452	0.354008	-22.3016	7.51889e-36	4.30964e-33	71.3175	0.601267	0.106748	-0.49452	11	31827084	F	I	PAX6	Body	shore	Body-shore	chr11:31827696-31827921	NA	NA
cg17444738	-0.378043	0.427984	-22.3009	7.53546e-36	4.313e-33	71.3153	0.617006	0.238963	-0.378043	4	85417969	R	II	NKX6-1	Body	island	Body-island	chr4:85417659-85420799	NA	NA
cg02649597	-0.467767	0.350192	-22.2933	7.71472e-36	4.40307e-33	71.292	0.584075	0.116308	-0.467767	2	45171621	R	II	SIX3	Body	island	Body-island	chr2:45169505-45171884	NA	NA
cg26203839	-0.26972	0.519862	-22.2901	7.79061e-36	4.44009e-33	71.2822	0.654722	0.385002	-0.26972	8	142174631	R	I	DENND3	Body	opensea	Body-opensea		TRUE	TRUE
cg02773086	-0.421601	0.410709	-22.2827	7.96948e-36	4.5292e-33	71.2597	0.62151	0.199909	-0.421601	2	177027440	F	I	HOXD3	TSS1500	shore	TSS1500-shore	chr2:177027617-177028014	NA	NA
cg25562958	0.421927	0.645326	22.2809	8.01322e-36	4.5441e-33	71.2542	0.434363	0.85629	0.421927	14	101490676	R	II	MIR1197	TSS1500	opensea	TSS1500-opensea		NA	NA			rs80084667
cg26365545	-0.356179	0.460436	-22.2807	8.01828e-36	4.5441e-33	71.2536	0.638525	0.282346	-0.356179	5	76932016	F	I	OTP	Body	shore	Body-shore	chr5:76932317-76933523	NA	NA
cg07551060	0.54282	0.506632	22.2789	8.06307e-36	4.56305e-33	71.2481	0.235222	0.778042	0.54282	10	121075316	F	II	GRK5	Body	opensea	Body-opensea		TRUE	TRUE
cg01401534	-0.270573	0.559408	-22.2766	8.11962e-36	4.5886e-33	71.2411	0.694694	0.424121	-0.270573	6	4079342	R	I	C6orf201	TSS200	island	TSS200-island	chr6:4079052-4079443	NA	TRUE			rs7756630
cg21686287	-0.388271	0.673863	-22.2623	8.48361e-36	4.78087e-33	71.1976	0.867999	0.479728	-0.388271	2	73021348	R	II	EXOC6B	Body	opensea	Body-opensea		NA	TRUE
cg18638769	-0.257657	0.754089	-22.2488	8.84332e-36	4.96273e-33	71.1563	0.882918	0.625261	-0.257657	14	105789784	F	I	PACS2	Body	opensea	Body-opensea		NA	NA
cg05365532	0.336206	0.427487	22.2291	9.39307e-36	5.25658e-33	71.0964	0.259384	0.59559	0.336206	19	55128350	F	II	LILRB1	TSS1500	opensea	TSS1500-opensea		NA	NA
cg24724664	-0.353182	0.591206	-22.2184	9.70618e-36	5.42426e-33	71.0638	0.767798	0.414615	-0.353182	2	172945383	F	II	MAP1D	3'UTR	island	3'UTR-island	chr2:172944988-172945384	NA	TRUE
cg19336198	-0.24223	0.667583	-22.2101	9.9572e-36	5.55682e-33	71.0384	0.788698	0.546468	-0.24223	7	4746462	R	I	FOXK1	Body	opensea	Body-opensea		NA	TRUE
cg06571387	-0.374338	0.54447	-22.2074	1.00404e-35	5.58777e-33	71.0301	0.731639	0.357301	-0.374338	2	176964101	F	II	HOXD12	TSS1500	island	TSS1500-island	chr2:176964062-176965509	NA	TRUE
cg14750948	-0.435721	0.397811	-22.201	1.02408e-35	5.68971e-33	71.0105	0.615672	0.179951	-0.435721	3	147130477	F	I	ZIC1	Body	island	Body-island	chr3:147130342-147130577	NA	NA
cg22720790	-0.289574	0.75268	-22.2007	1.02519e-35	5.68971e-33	71.0094	0.897467	0.607893	-0.289574	19	58716032	R	II	ZNF274	Body	island	Body-island	chr19:58715220-58716033	NA	NA
cg14265823	-0.373369	0.332147	-22.1973	1.03573e-35	5.73241e-33	70.9993	0.518831	0.145462	-0.373369	2	223163326	F	I	PAX3	1stExon	island	1stExon-island	chr2:223162946-223163912	NA	NA
cg07171687	-0.234777	0.774263	-22.1834	1.08113e-35	5.95349e-33	70.9566	0.891651	0.656875	-0.234777	10	22843607	F	II	PIP4K2A	Body	opensea	Body-opensea		NA	TRUE		rs76661504
cg26847503	0.287867	0.565099	22.1832	1.08159e-35	5.95349e-33	70.9562	0.421165	0.709033	0.287867	7	143056341	F	II	FAM131B	Body	shelf	Body-shelf	chr7:143058917-143060156	NA	NA
cg16435923	-0.215442	0.565774	-22.1806	1.09044e-35	5.99398e-33	70.9481	0.673495	0.458053	-0.215442	5	140744155	R	I	PCDHGA4	Body	island	Body-island	chr5:140743961-140744642	NA	NA
cg11693848	-0.311601	0.621001	-22.1688	1.13074e-35	6.19015e-33	70.912	0.776802	0.4652	-0.311601	13	109793698	F	II	MYO16	Body	island	Body-island	chr13:109792493-109793699	NA	NA		rs7986595
cg02706018	-0.307436	0.58329	-22.1458	1.21362e-35	6.63484e-33	70.8417	0.737008	0.429572	-0.307436	7	27168780	F	II	HOXA4	3'UTR	shore	3'UTR-shore	chr7:27169572-27170638	NA	NA
cg02245378	-0.415965	0.381759	-22.1448	1.21761e-35	6.64758e-33	70.8385	0.589742	0.173777	-0.415965	2	223161771	R	II	PAX3	Body	island	Body-island	chr2:223161531-223161919	NA	NA
cg09470010	-0.255374	0.755627	-22.1418	1.22875e-35	6.69548e-33	70.8294	0.883314	0.627941	-0.255374	10	104094152	F	II	GBF1	Body	opensea	Body-opensea		NA	TRUE
cg02561482	-0.405994	0.337964	-22.1035	1.383e-35	7.50043e-33	70.7119	0.540961	0.134967	-0.405994	6	50813551	R	I	TFAP2B	3'UTR	island	3'UTR-island	chr6:50813314-50813699	NA	NA
cg23440816	-0.364557	0.700198	-22.0995	1.3998e-35	7.58058e-33	70.6999	0.882476	0.517919	-0.364557	1	223948910	R	I	CAPN2	Body	opensea	Body-opensea		NA	TRUE			rs7548911
cg20575761	-0.386401	0.397624	-22.0904	1.43978e-35	7.77616e-33	70.6719	0.590824	0.204423	-0.386401	14	57275166	F	I	OTX2	5'UTR	island	5'UTR-island	chr14:57274607-57276840	NA	NA			rs72715073
cg03711485	-0.436422	0.487065	-22.0841	1.46815e-35	7.91873e-33	70.6525	0.705276	0.268854	-0.436422	10	101296036	F	I	NKX2-3	3'UTR	island	3'UTR-island	chr10:101294443-101297263	NA	TRUE
cg05246522	0.465309	0.593811	22.0813	1.48067e-35	7.96493e-33	70.6441	0.361157	0.826466	0.465309	17	25798973	R	II	KSR1	TSS200	opensea	TSS200-opensea		NA	NA
cg20765408	0.33039	0.27521	22.0802	1.48586e-35	7.98215e-33	70.6406	0.110015	0.440405	0.33039	13	25085669	F	II	PARP4	5'UTR	shore	5'UTR-shore	chr13:25086522-25087067	NA	NA
cg08065657	-0.462692	0.41701	-22.0734	1.5174e-35	8.1353e-33	70.6197	0.648357	0.185664	-0.462692	19	52223099	R	II	HAS1	Body	island	Body-island	chr19:52222423-52223208	NA	NA
cg10549973	0.242076	0.218117	22.0515	1.62353e-35	8.6754e-33	70.5525	0.0970793	0.339155	0.242076	14	58863097	R	II	TOMM20L	Body	island	Body-island	chr14:58862541-58863209	NA	TRUE
cg10216414	0.30741	0.305558	22.0432	1.66593e-35	8.89014e-33	70.5269	0.151853	0.459263	0.30741	2	101868516	F	II	C2orf29	TSS1500	shore	TSS1500-shore	chr2:101869023-101869876	NA	NA
cg03816707	-0.340109	0.408089	-22.0385	1.69037e-35	8.99675e-33	70.5124	0.578143	0.238034	-0.340109	20	43726544	R	I	KCNS1	Body	island	Body-island	chr20:43726297-43727372	TRUE	NA
cg23652859	-0.513772	0.379615	-22.0353	1.7071e-35	9.07375e-33	70.5027	0.636502	0.122729	-0.513772	19	59092692	R	II	MGC2752	Body	island	Body-island	chr19:59092691-59093273	TRUE	TRUE
cg17138769	-0.439742	0.322789	-22.0272	1.75009e-35	9.26822e-33	70.4779	0.54266	0.102918	-0.439742	10	118892211	F	I	VAX1	Body	island	Body-island	chr10:118892161-118892639	NA	NA
cg17731409	-0.268682	0.763993	-22.0271	1.75059e-35	9.26822e-33	70.4776	0.898334	0.629652	-0.268682	2	9397282	F	II	ASAP2	Body	opensea	Body-opensea		NA	TRUE
cg02489377	0.328419	0.584198	22.0182	1.79957e-35	9.50249e-33	70.4502	0.419989	0.748408	0.328419	9	125391390	R	II	OR1B1	1stExon	opensea	1stExon-opensea		NA	NA
cg20741169	-0.454208	0.313583	-22.0145	1.82027e-35	9.58667e-33	70.4389	0.540687	0.0864786	-0.454208	7	27205159	R	II	HOXA9	TSS200	island	TSS200-island	chr7:27203915-27206462	TRUE	NA	high-CpG:27171616-27171685
cg13462129	-0.437484	0.555047	-22.014	1.82347e-35	9.59096e-33	70.4371	0.773789	0.336305	-0.437484	7	96651281	F	II	DLX5	Body	island	Body-island	chr7:96650221-96651551	NA	NA
cg06960164	-0.449546	0.402881	-22.0075	1.86038e-35	9.75957e-33	70.4172	0.627654	0.178108	-0.449546	6	42072147	R	II	C6orf132	Body	island	Body-island	chr6:42072032-42072701	TRUE	NA
cg23337631	-0.377415	0.565588	-21.9904	1.96136e-35	1.02625e-32	70.3647	0.754295	0.37688	-0.377415	12	52994933	R	I	KRT72	1stExon	island	1stExon-island	chr12:52994772-52995312	NA	NA
cg06745704	0.329482	0.293317	21.9883	1.97433e-35	1.0317e-32	70.3581	0.128576	0.458058	0.329482	1	27668325	F	II	SYTL1	TSS200	opensea	TSS200-opensea		TRUE	TRUE
cg10180281	-0.370109	0.556071	-21.9845	1.99747e-35	1.04244e-32	70.3465	0.741125	0.371016	-0.370109	7	26897714	R	II	SKAP2	Body	opensea	Body-opensea		NA	TRUE
cg08682723	-0.225472	0.761929	-21.9825	2.01022e-35	1.04773e-32	70.3402	0.874665	0.649193	-0.225472	16	81713770	R	I	CMIP	Body	shore	Body-shore	chr16:81711864-81712214	NA	NA
cg05629774	-0.16382	0.828501	-21.9786	2.03411e-35	1.05688e-32	70.3285	0.910411	0.746591	-0.16382	12	132546836	F	II	EP400	Body	opensea	Body-opensea		NA	NA
cg04337653	-0.461538	0.426818	-21.9623	2.13977e-35	1.10808e-32	70.2781	0.657587	0.196049	-0.461538	6	100905587	F	II	SIM1	Body	island	Body-island	chr6:100905444-100905697	NA	NA
cg02036261	-0.415928	0.362064	-21.9505	2.21918e-35	1.14625e-32	70.2419	0.570028	0.154101	-0.415928	14	57276057	R	I	OTX2	5'UTR	island	5'UTR-island	chr14:57274607-57276840	NA	NA
cg26687173	-0.244264	0.741127	-21.9499	2.22373e-35	1.14713e-32	70.2399	0.863259	0.618995	-0.244264	19	33623091	F	II	WDR88	1stExon	island	1stExon-island	chr19:33622910-33623231	NA	NA
cg03369957	0.378576	0.519041	21.942	2.27906e-35	1.17267e-32	70.2154	0.329753	0.708328	0.378576	7	100252863	R	II	ACTL6B	Body	shore	Body-shore	chr7:100253782-100254150	NA	NA
cg03608520	-0.313963	0.666783	-21.9362	2.32019e-35	1.1923e-32	70.1977	0.823765	0.509802	-0.313963	6	31696720	F	II	DDAH2	Body	island	Body-island	chr6:31695894-31698245	NA	NA
cg12304520	-0.427144	0.585486	-21.9338	2.33722e-35	1.19802e-32	70.1904	0.799058	0.371914	-0.427144	5	140810123	R	II	PCDHGA4	Body	shore	Body-shore	chr5:140810494-140812617	TRUE	NA	low-CpG:140790256-140790651
cg03935060	0.443974	0.524445	21.9338	2.33728e-35	1.19802e-32	70.1904	0.302458	0.746433	0.443974	16	10272021	R	I	GRIN2A	Body	shore	Body-shore	chr16:10273943-10277424	NA	NA
cg14991487	-0.53099	0.368665	-21.9284	2.37714e-35	1.21536e-32	70.1735	0.63416	0.10317	-0.53099	2	176987404	R	II	HOXD9	TSS200	island	TSS200-island	chr2:176986424-176988291	TRUE	TRUE
cg14654171	0.482133	0.333905	21.9256	2.39736e-35	1.22259e-32	70.1651	0.0928387	0.574972	0.482133	9	130151001	R	II	GARNL3	Body	opensea	Body-opensea		TRUE	TRUE
cg19211880	-0.27915	0.72554	-21.9195	2.44378e-35	1.24469e-32	70.1461	0.865115	0.585965	-0.27915	3	134088357	F	I	AMOTL2	Body	shelf	Body-shelf	chr3:134092257-134093741	TRUE	NA		rs74725592
cg12520549	-0.286847	0.253112	-21.9013	2.58539e-35	1.31515e-32	70.0901	0.396535	0.109688	-0.286847	2	162280741	R	I	TBR1	3'UTR	shore	3'UTR-shore	chr2:162279835-162280709	TRUE	TRUE
cg02286091	-0.427569	0.356329	-21.8992	2.60276e-35	1.32231e-32	70.0834	0.570113	0.142544	-0.427569	5	78407678	F	I	BHMT	5'UTR	opensea	5'UTR-opensea		NA	TRUE		rs1050824
cg08539620	0.171056	0.135271	21.8973	2.61776e-35	1.32825e-32	70.0777	0.0497428	0.220799	0.171056	17	40118030	F	II	CNP	TSS1500	shore	TSS1500-shore	chr17:40118605-40119301	NA	NA
cg00252418	0.353178	0.502048	21.8967	2.62276e-35	1.32911e-32	70.0758	0.325459	0.678637	0.353178	7	154540325	F	II	DPP6	Body	shore	Body-shore	chr7:154542059-154542348	NA	NA
cg24275315	-0.375864	0.504522	-21.8839	2.72913e-35	1.37954e-32	70.0363	0.692455	0.31659	-0.375864	4	85417312	R	II	NKX6-1	Body	shore	Body-shore	chr4:85417659-85420799	NA	NA
cg22107476	0.177541	0.202209	21.8827	2.73932e-35	1.38296e-32	70.0326	0.113438	0.29098	0.177541	7	2442660	R	II	CHST12	TSS1500	shore	TSS1500-shore	chr7:2442792-2444011	NA	NA
cg22541735	-0.519266	0.325845	-21.8774	2.78457e-35	1.40404e-32	70.0163	0.585477	0.0662119	-0.519266	2	176988203	R	I	HOXD9	1stExon	island	1stExon-island	chr2:176986424-176988291	TRUE	TRUE
cg02885007	-0.337276	0.332412	-21.8721	2.8308e-35	1.422e-32	69.9999	0.50105	0.163774	-0.337276	2	176987605	R	I	HOXD9	1stExon	island	1stExon-island	chr2:176986424-176988291	TRUE	TRUE
cg12066770	0.335209	0.648981	21.8696	2.85308e-35	1.43141e-32	69.9921	0.481376	0.816586	0.335209	8	139510528	F	II	FAM135B	TSS1500	shore	TSS1500-shore	chr8:139508795-139509774	NA	NA
cg25583580	0.288312	0.245978	21.858	2.95817e-35	1.4786e-32	69.9562	0.101822	0.390134	0.288312	17	74731433	F	II	SFRS2	3'UTR	shore	3'UTR-shore	chr17:74732345-74734222	NA	NA
cg11421182	0.362478	0.400922	21.8487	3.04443e-35	1.51795e-32	69.9276	0.219683	0.58216	0.362478	20	36153479	R	II	BLCAP	5'UTR	shelf	5'UTR-shelf	chr20:36156022-36156669	TRUE	NA
cg19416570	-0.345345	0.469157	-21.8438	3.09199e-35	1.53975e-32	69.9122	0.641829	0.296484	-0.345345	19	58715677	R	I	ZNF274	Body	island	Body-island	chr19:58715220-58716033	NA	NA
cg21042248	-0.485619	0.436447	-21.8419	3.11028e-35	1.54694e-32	69.9063	0.679256	0.193637	-0.485619	19	59092612	R	II	MGC2752	Body	shore	Body-shore	chr19:59092691-59093273	TRUE	TRUE
cg09792881	-0.397688	0.277268	-21.8413	3.11592e-35	1.54784e-32	69.9045	0.476112	0.0784241	-0.397688	1	50884544	R	I	DMRTA2	Body	island	Body-island	chr1:50884228-50891471	NA	NA
cg22637867	-0.452595	0.512747	-21.8405	3.12338e-35	1.54963e-32	69.9021	0.739044	0.28645	-0.452595	19	12624466	F	II	ZNF709	5'UTR	island	5'UTR-island	chr19:12624273-12624477	NA	NA			rs35376025
cg02330500	0.237884	0.178799	21.8245	3.28277e-35	1.62072e-32	69.8527	0.0598575	0.297741	0.237884	14	95731916	F	II	CLMN	Body	opensea	Body-opensea		TRUE	TRUE
cg13661519	-0.352163	0.577709	-21.823	3.29794e-35	1.62621e-32	69.8481	0.753791	0.401627	-0.352163	7	27141088	F	I	HOXA2	Body	shelf	Body-shelf	chr7:27143181-27143479	NA	TRUE
cg22500132	0.29825	0.28256	21.8207	3.3223e-35	1.63622e-32	69.8408	0.133434	0.431685	0.29825	1	155162752	F	I	MUC1	TSS200	shore	TSS200-shore	chr1:155163434-155163818	NA	NA
cg23702848	-0.35041	0.678463	-21.81	3.43509e-35	1.68764e-32	69.8076	0.853668	0.503258	-0.35041	14	104172109	R	II	XRCC3	Body	opensea	Body-opensea		NA	NA
cg18447772	-0.47178	0.320125	-21.8018	3.52313e-35	1.72457e-32	69.7824	0.556015	0.0842352	-0.47178	7	27205224	F	I	HOXA9	TSS200	island	TSS200-island	chr7:27203915-27206462	TRUE	NA
cg26263263	-0.382242	0.50383	-21.7999	3.54418e-35	1.73277e-32	69.7765	0.694951	0.312709	-0.382242	10	118893430	F	II	VAX1	3'UTR	shore	3'UTR-shore	chr10:118893527-118894432	NA	NA
cg02926033	0.35449	0.665717	21.7987	3.55729e-35	1.73496e-32	69.7728	0.488472	0.842962	0.35449	7	154540580	F	II	DPP6	Body	shore	Body-shore	chr7:154542059-154542348	NA	NA
cg03822198	0.354245	0.311049	21.7925	3.62662e-35	1.7645e-32	69.7536	0.133926	0.488171	0.354245	12	116997535	R	II	MAP1LC3B2	5'UTR	opensea	5'UTR-opensea		TRUE	TRUE
cg26422458	-0.449753	0.421364	-21.7871	3.6881e-35	1.79008e-32	69.7369	0.64624	0.196488	-0.449753	1	79472452	F	I	ELTD1	5'UTR	island	5'UTR-island	chr1:79472281-79472537	NA	TRUE
cg21160099	-0.46164	0.443857	-21.7807	3.7634e-35	1.82443e-32	69.7168	0.674677	0.213037	-0.46164	6	100060917	F	II	PRDM13	Body	shore	Body-shore	chr6:100060979-100062657	NA	NA
cg01367005	0.199767	0.180521	21.7769	3.80749e-35	1.84358e-32	69.7052	0.0806375	0.280405	0.199767	17	38518966	R	II	GJD3	1stExon	island	1stExon-island	chr17:38518965-38520264	NA	NA
cg25854298	-0.213426	0.832631	-21.7749	3.8313e-35	1.85288e-32	69.699	0.939343	0.725918	-0.213426	10	73936754	R	II	ASCC1	Body	opensea	Body-opensea		NA	TRUE
cg19048532	-0.268741	0.617915	-21.7673	3.92301e-35	1.89495e-32	69.6755	0.752286	0.483545	-0.268741	7	27148002	F	I	HOXA3	Body	island	Body-island	chr7:27147589-27148389	NA	NA
cg17897352	-0.249482	0.764997	-21.7625	3.98224e-35	1.92126e-32	69.6606	0.889738	0.640256	-0.249482	10	121011644	F	II	GRK5	Body	opensea	Body-opensea		NA	TRUE
cg13803688	-0.300523	0.540824	-21.7611	4.00021e-35	1.92762e-32	69.6561	0.691085	0.390562	-0.300523	1	110610452	R	I	ALX3	Body	island	Body-island	chr1:110610265-110613303	NA	NA
cg08296903	-0.166259	0.844221	-21.7572	4.04908e-35	1.9465e-32	69.6441	0.92735	0.761091	-0.166259	16	14029456	F	II	ERCC4	Body	opensea	Body-opensea		NA	NA		rs55736359
cg22188918	-0.185533	0.69522	-21.7567	4.05517e-35	1.94711e-32	69.6426	0.787986	0.602454	-0.185533	7	100882175	F	I	CLDN15	TSS1500	opensea	TSS1500-opensea		NA	TRUE		rs12532195
cg03622664	-0.230684	0.814358	-21.7364	4.32005e-35	2.06935e-32	69.5797	0.9297	0.699016	-0.230684	13	21371628	R	II	XPO4	Body	opensea	Body-opensea		NA	TRUE
cg01748892	-0.278205	0.414788	-21.7273	4.44474e-35	2.11795e-32	69.5514	0.553891	0.275686	-0.278205	7	27184667	R	I	HOXA5	TSS1500	island	TSS1500-island	chr7:27182613-27185562	NA	NA
cg07375978	0.292924	0.322736	21.7271	4.44783e-35	2.11795e-32	69.5507	0.176275	0.469198	0.292924	12	52214320	R	II	FIGNL2	1stExon	island	1stExon-island	chr12:52214179-52216138	TRUE	NA
cg09523275	-0.357117	0.513928	-21.7266	4.45558e-35	2.11913e-32	69.549	0.692487	0.33537	-0.357117	6	28227093	F	II	NKAPL	TSS200	island	TSS200-island	chr6:28226979-28227483	NA	NA	high-CpG:28335047-28335084
cg18536148	-0.367888	0.612474	-21.7079	4.72235e-35	2.24204e-32	69.4911	0.796418	0.42853	-0.367888	17	59533844	R	II	TBX4	5'UTR	island	5'UTR-island	chr17:59531723-59535254	NA	NA
cg00008629	0.397479	0.370755	21.7078	4.72514e-35	2.24204e-32	69.4906	0.172015	0.569494	0.397479	9	115093661	R	II	ROD1	Body	shore	Body-shore	chr9:115095149-115095919	NA	NA
cg05756029	-0.406587	0.518327	-21.701	4.82625e-35	2.28117e-32	69.4695	0.72162	0.315034	-0.406587	11	18230754	R	I	LOC494141	Body	island	Body-island	chr11:18230619-18230906	NA	NA
cg00698602	-0.422533	0.293189	-21.6948	4.9203e-35	2.31575e-32	69.4503	0.504455	0.0819223	-0.422533	3	44481324	F	II	ZNF445	3'UTR	opensea	3'UTR-opensea		TRUE	NA		rs6776698
cg07973435	-0.406843	0.37451	-21.6845	5.08082e-35	2.38828e-32	69.4184	0.577931	0.171088	-0.406843	6	100905458	R	I	SIM1	Body	island	Body-island	chr6:100905444-100905697	NA	NA
cg02362103	-0.382543	0.393413	-21.6809	5.13843e-35	2.41171e-32	69.4072	0.584685	0.202141	-0.382543	1	119532773	F	I	TBX15	TSS1500	shore	TSS1500-shore	chr1:119531991-119532196	NA	NA
cg08886154	0.35738	0.615288	21.6807	5.14265e-35	2.41171e-32	69.4064	0.436598	0.793978	0.35738	7	127256676	R	II	PAX4	TSS1500	opensea	TSS1500-opensea		NA	NA
cg23090870	0.209023	0.323693	21.6784	5.17971e-35	2.42626e-32	69.3992	0.219182	0.428205	0.209023	19	38755753	F	I	SPINT2	Body	shore	Body-shore	chr19:38754846-38755699	TRUE	NA
cg21582373	-0.284339	0.63105	-21.6767	5.20686e-35	2.43614e-32	69.394	0.773219	0.48888	-0.284339	11	31818474	F	II	PAX6	Body	shore	Body-shore	chr11:31820060-31821416	NA	NA
cg08133486	-0.413015	0.543142	-21.6653	5.3966e-35	2.51614e-32	69.3584	0.749649	0.336634	-0.413015	6	100911746	F	II	SIM1	TSS200	shore	TSS200-shore	chr6:100912071-100913337	TRUE	TRUE
cg25017777	-0.342954	0.486436	-21.6617	5.45725e-35	2.54147e-32	69.3473	0.657913	0.314959	-0.342954	1	9298817	F	I	H6PD	5'UTR	shelf	5'UTR-shelf	chr1:9294401-9295118	NA	NA
cg27450010	0.433749	0.503568	21.6574	5.53088e-35	2.56981e-32	69.334	0.286693	0.720443	0.433749	4	16639181	R	II	LDB2	Body	opensea	Body-opensea		NA	TRUE			rs78854951
cg15888569	-0.33402	0.703519	-21.6341	5.94961e-35	2.74849e-32	69.2614	0.870529	0.536509	-0.33402	4	15033042	F	II	CPEB2	Body	opensea	Body-opensea		NA	TRUE
cg10305797	0.457585	0.614828	21.6307	6.01312e-35	2.77465e-32	69.2509	0.386036	0.843621	0.457585	19	35981677	R	II	KRTDAP	TSS1500	opensea	TSS1500-opensea		NA	NA
cg12451099	-0.419306	0.460263	-21.6298	6.03023e-35	2.77936e-32	69.2481	0.669916	0.25061	-0.419306	20	37356466	F	II	SLC32A1	Body	island	Body-island	chr20:37352130-37357372	NA	TRUE
cg22407942	0.447748	0.414236	21.6288	6.04878e-35	2.78472e-32	69.245	0.190362	0.63811	0.447748	7	22894828	F	II	SNORD93	TSS1500	shore	TSS1500-shore	chr7:22893794-22894577	NA	NA		rs3834336
cg04654530	-0.398066	0.407781	-21.624	6.1408e-35	2.82385e-32	69.23	0.606813	0.208748	-0.398066	2	63282702	F	I	OTX1	Body	island	Body-island	chr2:63282514-63283122	NA	TRUE		rs75832508
cg18731327	-0.438461	0.383067	-21.6197	6.22396e-35	2.85557e-32	69.2166	0.602298	0.163837	-0.438461	3	147114352	F	II	ZIC4	Body	island	Body-island	chr3:147113608-147114479	NA	NA
cg27080119	0.241788	0.170181	21.6163	6.29125e-35	2.88315e-32	69.2059	0.0492874	0.291076	0.241788	4	120987409	F	II	MAD2L1	Body	shore	Body-shore	chr4:120987617-120988156	NA	NA
cg02075410	-0.267989	0.795091	-21.6041	6.53707e-35	2.98899e-32	69.1678	0.929086	0.661097	-0.267989	4	151504138	F	I	LRBA	Body	island	Body-island	chr4:151504011-151505085	NA	TRUE
cg20747577	-0.518528	0.405194	-21.6015	6.59039e-35	3.00995e-32	69.1597	0.664458	0.14593	-0.518528	7	26897253	R	II	SKAP2	Body	opensea	Body-opensea		NA	NA
cg13694927	-0.371804	0.47136	-21.6003	6.61565e-35	3.01806e-32	69.1559	0.657262	0.285458	-0.371804	7	27184712	R	I	HOXA5	TSS1500	island	TSS1500-island	chr7:27182613-27185562	NA	NA
cg02517497	0.367179	0.620124	21.5989	6.64427e-35	3.02426e-32	69.1516	0.436534	0.803713	0.367179	16	71572050	R	II	CHST4	3'UTR	opensea	3'UTR-opensea		NA	NA
cg12305431	-0.387009	0.621578	-21.5972	6.67997e-35	3.03708e-32	69.1463	0.815082	0.428073	-0.387009	7	27157855	R	I	HOXA3	5'UTR	shelf	5'UTR-shelf	chr7:27154999-27155426	NA	NA
cg10292376	-0.324931	0.525695	-21.5947	6.73122e-35	3.05692e-32	69.1387	0.688161	0.36323	-0.324931	12	52995070	F	II	KRT72	1stExon	island	1stExon-island	chr12:52994772-52995312	NA	NA
cg08491487	-0.373832	0.405648	-21.5788	7.07729e-35	3.20324e-32	69.0888	0.592564	0.218732	-0.373832	6	30039130	F	I	RNF39	Body	island	Body-island	chr6:30038881-30039477	NA	NA			rs9261293
cg10703826	-0.408209	0.323768	-21.5777	7.10048e-35	3.20652e-32	69.0856	0.527873	0.119664	-0.408209	1	119532116	F	I	TBX15	1stExon	island	1stExon-island	chr1:119531991-119532196	NA	TRUE		rs73011341
cg04244985	0.381285	0.356146	21.5605	7.49561e-35	3.37738e-32	69.0317	0.165503	0.546788	0.381285	19	55043845	F	II	KIR3DX1	TSS200	opensea	TSS200-opensea		NA	NA
cg15577272	0.503433	0.548284	21.5578	7.55956e-35	3.39859e-32	69.0233	0.296568	0.800001	0.503433	7	157932397	F	I	PTPRN2	Body	opensea	Body-opensea		NA	NA
cg00445405	-0.377055	0.604906	-21.5496	7.75548e-35	3.48277e-32	68.9978	0.793433	0.416378	-0.377055	2	63281844	R	II	OTX1	Body	shore	Body-shore	chr2:63282514-63283122	NA	NA
cg24020826	0.436122	0.641869	21.5478	7.79892e-35	3.49838e-32	68.9923	0.423808	0.85993	0.436122	8	140630180	R	II	KCNK9	3'UTR	shore	3'UTR-shore	chr8:140631096-140631332	NA	NA
cg23931049	0.377017	0.532597	21.5336	8.15494e-35	3.65175e-32	68.9479	0.344088	0.721105	0.377017	18	21452730	R	I	LAMA3	TSS1500	opensea	TSS1500-opensea		NA	NA
cg14029001	-0.325564	0.595481	-21.5335	8.15899e-35	3.65175e-32	68.9474	0.758263	0.432699	-0.325564	6	41998500	F	I	CCND3	5'UTR	opensea	5'UTR-opensea		NA	TRUE
cg11312408	-0.4482	0.339985	-21.5324	8.18744e-35	3.65635e-32	68.9439	0.564085	0.115885	-0.4482	13	58207013	F	II	PCDH17	1stExon	island	1stExon-island	chr13:58206526-58208930	NA	NA
cg08473330	-0.364451	0.541513	-21.5282	8.29554e-35	3.70052e-32	68.9309	0.723739	0.359287	-0.364451	2	63282883	F	II	OTX1	Body	island	Body-island	chr2:63282514-63283122	NA	TRUE
cg04209913	-0.506233	0.391283	-21.5247	8.38634e-35	3.73688e-32	68.9201	0.6444	0.138167	-0.506233	5	37836246	R	I	GDNF	TSS1500	shore	TSS1500-shore	chr5:37836747-37840726	NA	NA
cg25513635	-0.449486	0.471722	-21.5193	8.5302e-35	3.79291e-32	68.9032	0.696465	0.246979	-0.449486	19	18981378	F	II	GDF1	5'UTR	shore	5'UTR-shore	chr19:18979351-18981200	NA	NA
cg12664119	-0.276215	0.636921	-21.5193	8.53093e-35	3.79291e-32	68.9031	0.775029	0.498814	-0.276215	1	119532352	F	II	TBX15	TSS200	shore	TSS200-shore	chr1:119529819-119530712	NA	TRUE
cg05940691	0.524593	0.6132	21.5138	8.67857e-35	3.85004e-32	68.886	0.350904	0.875497	0.524593	1	241912764	F	I	WDR64	Body	opensea	Body-opensea		NA	NA
cg21464565	-0.325072	0.725934	-21.5089	8.81363e-35	3.90565e-32	68.8707	0.88847	0.563399	-0.325072	7	27141139	F	II	HOXA2	Body	shelf	Body-shelf	chr7:27143181-27143479	NA	TRUE
cg17353412	-0.417913	0.501125	-21.5017	9.01712e-35	3.98704e-32	68.848	0.710081	0.292168	-0.417913	7	27141774	R	I	HOXA2	1stExon	shore	1stExon-shore	chr7:27143181-27143479	NA	NA
cg15362155	0.352954	0.554624	21.4965	9.16427e-35	4.03879e-32	68.8319	0.378148	0.731101	0.352954	11	62066533	F	II	SCGB1D4	5'UTR	opensea	5'UTR-opensea		NA	NA		rs34790668
cg00720839	-0.180431	0.853537	-21.49	9.35473e-35	4.11822e-32	68.8114	0.943753	0.763322	-0.180431	6	32800486	F	I	TAP2	Body	opensea	Body-opensea		NA	NA
cg18862481	-0.464235	0.323194	-21.4747	9.81724e-35	4.3124e-32	68.7634	0.555311	0.0910767	-0.464235	3	129693370	F	I	TRH	5'UTR	island	5'UTR-island	chr3:129693127-129694841	NA	NA		rs9860093
cg17799287	0.353213	0.343962	21.4742	9.83361e-35	4.31487e-32	68.7617	0.167355	0.520568	0.353213	13	92001764	F	II	MIR19A	TSS1500	shore	TSS1500-shore	chr13:91999541-92001441	NA	NA
cg23077820	-0.245076	0.768965	-21.4593	1.03033e-34	4.50131e-32	68.7154	0.891503	0.646427	-0.245076	2	223154176	F	II	PAX3	Body	shore	Body-shore	chr2:223155726-223156154	NA	NA
cg15564098	-0.497885	0.387553	-21.4493	1.06343e-34	4.64089e-32	68.6839	0.636495	0.13861	-0.497885	7	27281346	R	I	EVX1	TSS1500	shore	TSS1500-shore	chr7:27282086-27283136	NA	TRUE
cg11827910	-0.459279	0.405676	-21.4435	1.08298e-34	4.71601e-32	68.6658	0.635316	0.176037	-0.459279	11	31825756	R	I	PAX6	Body	island	Body-island	chr11:31825743-31826967	NA	NA
cg13531667	0.357072	0.242926	21.4368	1.10634e-34	4.8125e-32	68.6446	0.06439	0.421462	0.357072	5	112825132	F	II	MCC	TSS1500	shore	TSS1500-shore	chr5:112823256-112824304	NA	NA
cg17927313	-0.218274	0.780678	-21.4358	1.10976e-34	4.81696e-32	68.6415	0.889815	0.671541	-0.218274	15	65151592	R	II	PLEKHO2	Body	opensea	Body-opensea		NA	TRUE
cg24720355	-0.281005	0.706663	-21.423	1.15548e-34	4.99923e-32	68.6013	0.847165	0.566161	-0.281005	1	119526255	F	II	TBX15	5'UTR	shore	5'UTR-shore	chr1:119526782-119527192	NA	NA		rs73011322
cg22322465	-0.319643	0.410856	-21.4214	1.16117e-34	5.01307e-32	68.5964	0.570677	0.251034	-0.319643	4	174459201	R	II	NBLA00301	Body	island	Body-island	chr4:174459200-174460054	NA	TRUE
cg09325711	0.270928	0.164264	21.4079	1.21173e-34	5.22014e-32	68.5541	0.0287999	0.299728	0.270928	7	39662764	F	II	RALA	TSS1500	island	TSS1500-island	chr7:39662543-39663792	NA	NA
cg26674479	-0.296763	0.587353	-21.3997	1.24372e-34	5.34081e-32	68.5281	0.735734	0.438972	-0.296763	7	27281415	R	II	EVX1	TSS1500	shore	TSS1500-shore	chr7:27282086-27283136	NA	TRUE
cg10424681	-0.278159	0.611499	-21.3969	1.25465e-34	5.38201e-32	68.5194	0.750579	0.47242	-0.278159	6	4079350	R	I	C6orf201	TSS200	island	TSS200-island	chr6:4079052-4079443	NA	TRUE
cg18040878	-0.386371	0.486372	-21.3807	1.3207e-34	5.65327e-32	68.4684	0.679557	0.293186	-0.386371	12	54409229	F	II	HOXC4	TSS1500	shore	TSS1500-shore	chr12:54408426-54408713	NA	NA
cg05307752	0.513046	0.419133	21.3689	1.37047e-34	5.85388e-32	68.4316	0.16261	0.675656	0.513046	2	144462886	F	II	ARHGAP15	Body	opensea	Body-opensea		NA	TRUE
cg01031101	-0.37345	0.387316	-21.3625	1.39851e-34	5.96731e-32	68.4115	0.574041	0.200591	-0.37345	6	28227091	F	I	NKAPL	TSS200	island	TSS200-island	chr6:28226979-28227483	NA	NA	high-CpG:28335047-28335084
cg23193759	0.277751	0.27405	21.3594	1.41232e-34	6.01986e-32	68.4017	0.135175	0.412925	0.277751	10	71389896	F	II	C10orf35	TSS200	island	TSS200-island	chr10:71389862-71390355	NA	NA		rs10998885
cg20801476	-0.384253	0.50108	-21.3572	1.42213e-34	6.05525e-32	68.3948	0.693206	0.308953	-0.384253	7	27281465	R	II	EVX1	TSS1500	shore	TSS1500-shore	chr7:27282086-27283136	NA	TRUE
cg15506609	-0.39353	0.558057	-21.3519	1.44655e-34	6.14621e-32	68.3779	0.754822	0.361292	-0.39353	7	27206073	R	I	HOXA9	TSS1500	island	TSS1500-island	chr7:27203915-27206462	NA	NA			rs77936575
cg11796827	-0.209044	0.596416	-21.3263	1.5683e-34	6.64948e-32	68.2975	0.700938	0.491893	-0.209044	7	6435978	R	I	RAC1	Body	opensea	Body-opensea		NA	NA
cg15188623	-0.49508	0.547071	-21.3095	1.654e-34	6.99074e-32	68.2446	0.794611	0.299531	-0.49508	15	90608429	R	II	ZNF710	5'UTR	shore	5'UTR-shore	chr15:90610400-90611606	NA	NA
cg06779253	0.321862	0.431498	21.3041	1.68269e-34	7.10455e-32	68.2275	0.270568	0.592429	0.321862	1	9375627	F	II	SPSB1	5'UTR	opensea	5'UTR-opensea		TRUE	TRUE
cg19730691	-0.250681	0.52794	-21.2998	1.70543e-34	7.19298e-32	68.2141	0.65328	0.402599	-0.250681	1	119526437	F	I	TBX15	5'UTR	shore	5'UTR-shore	chr1:119526782-119527192	NA	NA			rs73011325
cg08063051	0.476855	0.536788	21.2978	1.71634e-34	7.23144e-32	68.2078	0.29836	0.775215	0.476855	16	1428706	R	I	UNKL	5'UTR	shore	5'UTR-shore	chr16:1429050-1430104	NA	TRUE
cg19361800	-0.255696	0.749623	-21.2973	1.71911e-34	7.23553e-32	68.2062	0.877471	0.621775	-0.255696	2	208014177	F	II	KLF7	Body	opensea	Body-opensea		NA	TRUE
cg00334063	-0.555593	0.434209	-21.2801	1.81523e-34	7.6321e-32	68.152	0.712006	0.156413	-0.555593	3	147106010	R	I	ZIC4	3'UTR	shelf	3'UTR-shelf	chr3:147108511-147111703	NA	NA
cg15312264	-0.408168	0.389289	-21.2716	1.86502e-34	7.8251e-32	68.1251	0.593373	0.185205	-0.408168	14	55907299	R	I	TBPL2	TSS200	island	TSS200-island	chr14:55907197-55907433	NA	NA
cg22517388	-0.234184	0.623832	-21.2577	1.94934e-34	8.16187e-32	68.0811	0.740924	0.50674	-0.234184	5	71014918	R	II	CARTPT	TSS200	island	TSS200-island	chr5:71014917-71015715	NA	NA
cg11095383	-0.382187	0.43982	-21.2568	1.95461e-34	8.1754e-32	68.0785	0.630914	0.248727	-0.382187	5	140174887	R	I	PCDHA1	Body	island	Body-island	chr5:140174573-140174888	TRUE	NA			rs7727472
cg07195577	0.262943	0.180743	21.256	1.95955e-34	8.18756e-32	68.0759	0.0492711	0.312214	0.262943	17	27052828	R	II	TLCD1	Body	shore	Body-shore	chr17:27052941-27054084	NA	NA
cg06966811	-0.323652	0.479233	-21.2451	2.02847e-34	8.45798e-32	68.0416	0.641059	0.317406	-0.323652	14	57276789	R	I	OTX2	5'UTR	island	5'UTR-island	chr14:57274607-57276840	NA	NA
cg24884142	-0.352315	0.359662	-21.2434	2.03976e-34	8.49625e-32	68.036	0.53582	0.183505	-0.352315	1	119532056	F	I	TBX15	1stExon	island	1stExon-island	chr1:119531991-119532196	NA	TRUE		rs75870087
cg18563999	0.182944	0.14238	21.2359	2.08864e-34	8.68185e-32	68.0125	0.0509085	0.233852	0.182944	12	54785003	R	I	ZNF385A	Body	island	Body-island	chr12:54784900-54785238	TRUE	NA
cg06649856	0.404052	0.571851	21.2264	2.15258e-34	8.92918e-32	67.9825	0.369825	0.773877	0.404052	7	158355003	R	I	PTPRN2	Body	opensea	Body-opensea		NA	TRUE
cg03074946	-0.240493	0.731327	-21.2161	2.22407e-34	9.19728e-32	67.95	0.851573	0.61108	-0.240493	12	120687694	F	II	PXN	5'UTR	opensea	5'UTR-opensea		NA	TRUE			rs73415041
cg10853949	0.265296	0.585277	21.2138	2.24037e-34	9.2552e-32	67.9427	0.452629	0.717925	0.265296	17	80290217	R	I	SECTM1	5'UTR	shore	5'UTR-shore	chr17:80291020-80292394	NA	NA
cg20311002	0.518009	0.544896	21.2123	2.25112e-34	9.28055e-32	67.938	0.285892	0.803901	0.518009	1	244763541	F	II	C1orf101	Body	opensea	Body-opensea		TRUE	TRUE
cg12265623	-0.415764	0.457784	-21.2046	2.30712e-34	9.50168e-32	67.9135	0.665666	0.249902	-0.415764	7	8481994	R	II	NXPH1	Body	island	Body-island	chr7:8481974-8482762	NA	NA
cg06215107	-0.331437	0.711302	-21.2027	2.32132e-34	9.5504e-32	67.9074	0.87702	0.545583	-0.331437	4	151504725	R	II	LRBA	Body	island	Body-island	chr4:151504011-151505085	NA	TRUE
cg14723977	-0.212109	0.819115	-21.2023	2.32393e-34	9.55137e-32	67.9063	0.925169	0.71306	-0.212109	19	15532806	F	II	WIZ	3'UTR	shelf	3'UTR-shelf	chr19:15535459-15535853	NA	NA
cg23669081	-0.41026	0.626947	-21.1927	2.39591e-34	9.81712e-32	67.8759	0.832077	0.421817	-0.41026	17	46685353	R	I	HOXB7	Body	island	Body-island	chr17:46685244-46685449	NA	NA		rs1042216	rs62637586
cg06766367	0.232715	0.210114	21.1906	2.41224e-34	9.87396e-32	67.8692	0.0937562	0.326471	0.232715	16	67062687	R	II	CBFB	TSS1500	island	TSS1500-island	chr16:67062613-67064012	NA	NA
cg10770662	-0.251303	0.818294	-21.1901	2.41589e-34	9.87885e-32	67.8677	0.943946	0.692643	-0.251303	6	46890102	F	II	GPR116	TSS1500	opensea	TSS1500-opensea		NA	NA			rs76613681
cg09562675	0.362657	0.574657	21.1885	2.42855e-34	9.92052e-32	67.8625	0.393328	0.755986	0.362657	5	1245669	F	II	SLC6A18	Body	shore	Body-shore	chr5:1245901-1246927	NA	NA
cg07423205	-0.561075	0.374521	-21.1862	2.44633e-34	9.98304e-32	67.8552	0.655059	0.0939834	-0.561075	5	37834672	R	II	GDNF	Body	island	Body-island	chr5:37834671-37835128	NA	NA
cg18223453	-0.315222	0.607042	-21.1858	2.44919e-34	9.98458e-32	67.8541	0.764652	0.449431	-0.315222	17	59554746	F	I	TBX4	Body	opensea	Body-opensea		NA	NA
cg19240213	-0.309779	0.611212	-21.1817	2.48111e-34	1.01045e-31	67.8412	0.766102	0.456323	-0.309779	7	27163095	R	I	HOXA3	5'UTR	shore	5'UTR-shore	chr7:27163819-27164098	NA	TRUE
cg12744634	0.179742	0.159484	21.1697	2.57749e-34	1.04861e-31	67.8033	0.069613	0.249355	0.179742	1	26560303	R	II	CCDC21	TSS1500	shore	TSS1500-shore	chr1:26560449-26561028	NA	NA
cg03532926	-0.447789	0.364634	-21.1694	2.58004e-34	1.04861e-31	67.8023	0.588529	0.14074	-0.447789	7	153584839	R	I	DPP6	Body	island	Body-island	chr7:153583317-153585666	NA	NA
cg21783847	0.240092	0.230818	21.1672	2.59882e-34	1.05306e-31	67.7951	0.110772	0.350863	0.240092	1	167522422	F	II	CREG1	Body	shore	Body-shore	chr1:167522469-167523070	NA	NA		rs75417177
cg24079381	0.310677	0.44403	21.1666	2.6038e-34	1.05401e-31	67.7932	0.288692	0.599368	0.310677	17	77115473	F	II	HRNBP3	5'UTR	opensea	5'UTR-opensea		NA	NA		rs61382501
cg00366850	-0.507156	0.548607	-21.1603	2.65621e-34	1.07415e-31	67.7733	0.802185	0.295029	-0.507156	2	45232417	R	II	SIX2	3'UTR	island	3'UTR-island	chr2:45231781-45232550	NA	NA
cg18582260	0.283239	0.297438	21.149	2.75299e-34	1.10994e-31	67.7377	0.155818	0.439058	0.283239	13	25085301	R	I	PARP4	5'UTR	shore	5'UTR-shore	chr13:25086522-25087067	NA	NA
cg19340889	-0.36874	0.367468	-21.1456	2.78372e-34	1.11806e-31	67.7267	0.551838	0.183097	-0.36874	6	108488801	R	II	NR2E1	Body	island	Body-island	chr6:108485671-108490539	NA	NA
cg12140851	-0.462137	0.531965	-21.1455	2.78425e-34	1.11806e-31	67.7265	0.763033	0.300896	-0.462137	7	26897612	R	II	SKAP2	Body	opensea	Body-opensea		NA	TRUE			rs35818880
cg02119577	-0.26636	0.609646	-21.1427	2.80889e-34	1.12683e-31	67.7177	0.742826	0.476466	-0.26636	21	40195074	F	I	ETS2	3'UTR	shore	3'UTR-shore	chr21:40194644-40194849	NA	TRUE		rs78500768
cg07212702	-0.451409	0.586077	-21.1407	2.82744e-34	1.13314e-31	67.7112	0.811781	0.360372	-0.451409	6	157137791	R	II	ARID1B	Body	opensea	Body-opensea		NA	TRUE
cg07967632	-0.265573	0.797518	-21.1249	2.97339e-34	1.19045e-31	67.6611	0.930304	0.664731	-0.265573	15	101601131	R	I	LRRK1	Body	opensea	Body-opensea		NA	NA
cg18980148	-0.529188	0.46953	-21.1242	2.97967e-34	1.19178e-31	67.659	0.734124	0.204937	-0.529188	8	134552558	F	II	ST3GAL1	5'UTR	opensea	5'UTR-opensea		NA	TRUE
cg13356175	0.335602	0.349688	21.1236	2.98567e-34	1.19299e-31	67.657	0.181887	0.517489	0.335602	1	153413641	F	II	S100A7L2	TSS1500	opensea	TSS1500-opensea		NA	NA
cg14717557	-0.412947	0.510317	-21.1209	3.01117e-34	1.20199e-31	67.6486	0.716791	0.303844	-0.412947	6	100895618	R	II	SIM1	Body	shore	Body-shore	chr6:100895773-100896062	NA	TRUE
cg07004744	-0.270746	0.750441	-21.1105	3.11224e-34	1.23987e-31	67.6157	0.885814	0.615068	-0.270746	8	641479	R	I	ERICH1	Body	shelf	Body-shelf	chr8:637393-638251	NA	NA
cg10690003	-0.268661	0.703662	-21.1074	3.14343e-34	1.25106e-31	67.6058	0.837992	0.569331	-0.268661	7	96622311	F	II	DLX6AS	Body	opensea	Body-opensea		NA	TRUE
cg07035659	-0.379905	0.333823	-21.1043	3.17474e-34	1.26227e-31	67.5959	0.523775	0.14387	-0.379905	4	4859975	R	II	MSX1	TSS1500	island	TSS1500-island	chr4:4859632-4860191	NA	NA
cg03744763	-0.42924	0.494427	-21.1008	3.20998e-34	1.27502e-31	67.5849	0.709047	0.279807	-0.42924	7	27184737	R	II	HOXA5	TSS1500	island	TSS1500-island	chr7:27182613-27185562	NA	NA
cg01395254	0.480783	0.646216	21.0986	3.23343e-34	1.28307e-31	67.5777	0.405824	0.886607	0.480783	2	2336428	R	II	MYT1L	TSS1500	opensea	TSS1500-opensea		NA	NA
cg19907796	-0.3829	0.525231	-21.0973	3.24691e-34	1.28715e-31	67.5736	0.716681	0.333781	-0.3829	2	71134694	R	II	VAX2	Body	island	Body-island	chr2:71134585-71134792	NA	TRUE
cg00955413	-0.256225	0.723061	-21.0938	3.28316e-34	1.30024e-31	67.5625	0.851174	0.594949	-0.256225	5	114935797	F	II	TMED7-TICAM2	Body	shore	Body-shore	chr5:114937613-114938149	NA	TRUE
cg25942990	-0.44509	0.341919	-21.0929	3.29226e-34	1.30256e-31	67.5598	0.564464	0.119374	-0.44509	2	177014996	F	I	HOXD4	TSS1500	island	TSS1500-island	chr2:177014948-177015214	NA	NA		rs77628401
cg04567731	-0.478525	0.429545	-21.0834	3.39333e-34	1.34123e-31	67.5297	0.668807	0.190282	-0.478525	17	59532519	R	II	TBX4	TSS1500	island	TSS1500-island	chr17:59531723-59535254	NA	NA
cg17437939	-0.570031	0.417738	-21.0774	3.45891e-34	1.36486e-31	67.5106	0.702753	0.132722	-0.570031	7	97361252	R	II	TAC1	TSS200	island	TSS200-island	chr7:97361132-97363018	NA	NA
cg04095339	-0.259272	0.673268	-21.0773	3.45991e-34	1.36486e-31	67.5103	0.802904	0.543632	-0.259272	5	1879917	F	II	IRX4	Body	island	Body-island	chr5:1879689-1879928	NA	NA		rs1689721
cg07938743	-0.34326	0.668726	-21.0754	3.48132e-34	1.37197e-31	67.5042	0.840357	0.497096	-0.34326	2	63283939	F	II	OTX1	3'UTR	island	3'UTR-island	chr2:63283936-63284147	NA	NA
cg20168964	0.416968	0.562547	21.0711	3.52984e-34	1.38836e-31	67.4904	0.354063	0.771031	0.416968	12	130333393	R	II	TMEM132D	Body	opensea	Body-opensea		NA	NA
cg05100070	-0.327226	0.50611	-21.0677	3.56797e-34	1.40199e-31	67.4797	0.669723	0.342497	-0.327226	6	100896760	R	II	SIM1	Body	shore	Body-shore	chr6:100897080-100897621	NA	NA
cg05685297	-0.137888	0.831254	-21.0674	3.57196e-34	1.40219e-31	67.4786	0.900198	0.76231	-0.137888	8	96070313	F	II	C8orf38	3'UTR	opensea	3'UTR-opensea		NA	NA
cg01923099	0.227157	0.169283	21.0621	3.63238e-34	1.42452e-31	67.4619	0.0557038	0.282861	0.227157	11	2889875	F	II	KCNQ1DN	TSS1500	shore	TSS1500-shore	chr11:2890388-2891337	NA	NA
cg26205859	-0.435465	0.621137	-21.0588	3.67054e-34	1.43774e-31	67.4516	0.838869	0.403405	-0.435465	7	76967860	R	II	PION	Body	opensea	Body-opensea		NA	TRUE
cg04608356	0.356559	0.363101	21.0586	3.67323e-34	1.43774e-31	67.4508	0.184822	0.54138	0.356559	1	27668433	R	II	SYTL1	TSS200	opensea	TSS200-opensea		TRUE	TRUE
cg15834395	0.308678	0.33138	21.0512	3.7614e-34	1.46939e-31	67.4272	0.177041	0.485719	0.308678	10	134261413	F	II	C10orf91	Body	opensea	Body-opensea		TRUE	TRUE
cg10919344	0.414039	0.58377	21.0462	3.82144e-34	1.4914e-31	67.4115	0.37675	0.790789	0.414039	11	59210634	F	II	OR5A1	TSS200	opensea	TSS200-opensea		NA	NA
cg26738880	0.398928	0.706838	21.045	3.83663e-34	1.49587e-31	67.4075	0.507374	0.906302	0.398928	7	154429032	R	II	DPP6	Body	opensea	Body-opensea		NA	NA
cg20170777	0.373385	0.623586	21.042	3.87339e-34	1.50874e-31	67.398	0.436893	0.810278	0.373385	17	13972099	F	II	COX10	TSS1500	shore	TSS1500-shore	chr17:13972630-13973085	NA	NA		rs4792433
cg18356785	-0.360516	0.595264	-21.0391	3.90898e-34	1.52113e-31	67.3889	0.775522	0.415006	-0.360516	11	47611780	R	I	C1QTNF4	Body	island	Body-island	chr11:47611138-47612438	NA	NA
cg02086467	-0.27238	0.326196	-21.0378	3.92572e-34	1.52617e-31	67.3847	0.462386	0.190006	-0.27238	14	57276527	R	I	OTX2	5'UTR	island	5'UTR-island	chr14:57274607-57276840	NA	NA
cg22076160	0.30762	0.318363	21.0339	3.97481e-34	1.54259e-31	67.3723	0.164553	0.472173	0.30762	1	235805690	R	II	GNG4	5'UTR	island	5'UTR-island	chr1:235805318-235805771	TRUE	NA
cg07369606	0.330527	0.583719	21.0338	3.97562e-34	1.54259e-31	67.3721	0.418456	0.748982	0.330527	17	80290169	F	I	SECTM1	5'UTR	shore	5'UTR-shore	chr17:80291020-80292394	NA	NA
cg04723343	-0.254128	0.691667	-21.0332	3.98317e-34	1.54403e-31	67.3702	0.818731	0.564603	-0.254128	2	238647913	F	I	LRRFIP1	Body	shelf	Body-shelf	chr2:238643905-238644109	NA	NA
cg25588852	0.254223	0.219837	21.0221	4.12737e-34	1.59685e-31	67.3348	0.0927248	0.346948	0.254223	2	216877276	R	II	MREG	Body	shore	Body-shore	chr2:216877899-216878352	NA	NA		rs3836042
cg00767581	-0.426129	0.529048	-21.0201	4.1541e-34	1.60565e-31	67.3284	0.742112	0.315983	-0.426129	2	177015125	F	II	HOXD4	TSS1500	island	TSS1500-island	chr2:177014948-177015214	NA	NA
cg23229261	-0.426934	0.311211	-21.0182	4.17895e-34	1.6137e-31	67.3225	0.524679	0.0977444	-0.426934	2	63284066	F	I	OTX1	3'UTR	island	3'UTR-island	chr2:63283936-63284147	NA	TRUE
cg06344474	0.35434	0.696361	21.0129	4.25031e-34	1.63656e-31	67.3056	0.519191	0.873531	0.35434	8	144801223	R	II	MAPK15	Body	island	Body-island	chr8:144800957-144801335	NA	NA
cg00188704	-0.331869	0.722561	-21.0124	4.25793e-34	1.63792e-31	67.3039	0.888496	0.556627	-0.331869	7	27140797	R	II	HOXA2	Body	shelf	Body-shelf	chr7:27143181-27143479	NA	TRUE
cg10512745	-0.563034	0.331898	-21.0068	4.33477e-34	1.66588e-31	67.2861	0.613415	0.0503807	-0.563034	1	50884480	R	I	DMRTA2	Body	island	Body-island	chr1:50884228-50891471	NA	NA
cg00463767	-0.413281	0.517979	-21.0039	4.37487e-34	1.67969e-31	67.2769	0.724619	0.311338	-0.413281	2	63282043	R	II	OTX1	Body	shore	Body-shore	chr2:63282514-63283122	NA	NA
cg07350016	0.351024	0.669795	20.999	4.4441e-34	1.70464e-31	67.2613	0.494283	0.845307	0.351024	12	130337265	F	II	TMEM132D	Body	shelf	Body-shelf	chr12:130339683-130343584	NA	NA		rs76881944
cg18693673	-0.460452	0.442944	-20.998	4.45791e-34	1.70831e-31	67.2582	0.67317	0.212718	-0.460452	19	58629975	R	II	ZSCAN18	TSS200	island	TSS200-island	chr19:58629309-58630241	NA	NA
cg15887459	-0.376514	0.534519	-20.9953	4.49747e-34	1.72183e-31	67.2494	0.722776	0.346262	-0.376514	11	18230903	R	II	LOC494141	Body	island	Body-island	chr11:18230619-18230906	NA	NA
cg18049571	-0.46036	0.496893	-20.9933	4.52578e-34	1.73102e-31	67.2431	0.727073	0.266713	-0.46036	8	54791151	R	II	RGS20	Body	shore	Body-shore	chr8:54791845-54795141	NA	NA
cg00018606	-0.348158	0.568522	-20.9892	4.5851e-34	1.75204e-31	67.2302	0.742602	0.394443	-0.348158	2	208989425	F	II	CRYGD	TSS200	shore	TSS200-shore	chr2:208988834-208989269	NA	NA
cg02643054	-0.540222	0.408937	-20.9699	4.87736e-34	1.85491e-31	67.1687	0.679048	0.138825	-0.540222	7	27206544	F	II	HOXA9	TSS1500	shore	TSS1500-shore	chr7:27203915-27206462	NA	NA
cg20937934	0.376714	0.681287	20.9649	4.95706e-34	1.88331e-31	67.1526	0.49293	0.869644	0.376714	18	21452788	F	I	LAMA3	TSS200	opensea	TSS200-opensea		NA	NA		rs28413178
cg17006281	0.372029	0.646531	20.9646	4.96139e-34	1.88331e-31	67.1517	0.460516	0.832545	0.372029	7	154589595	F	II	DPP6	Body	shelf	Body-shelf	chr7:154585682-154586336	NA	NA
cg09043518	0.465857	0.595794	20.9635	4.9793e-34	1.88833e-31	67.1481	0.362865	0.828722	0.465857	17	80290106	R	II	SECTM1	5'UTR	shore	5'UTR-shore	chr17:80291020-80292394	NA	NA
cg03538383	-0.204598	0.825183	-20.9374	5.41312e-34	2.04514e-31	67.065	0.927482	0.722884	-0.204598	12	110399167	F	II	GIT2	Body	opensea	Body-opensea		NA	NA
cg26587228	0.37624	0.462363	20.9151	5.8156e-34	2.18693e-31	66.9936	0.274243	0.650483	0.37624	19	57641846	F	II	USP29	Body	opensea	Body-opensea		NA	NA		rs74511605
cg11280525	-0.379484	0.35872	-20.9118	5.87743e-34	2.20812e-31	66.9831	0.548461	0.168978	-0.379484	5	87955695	R	II	LOC645323	Body	island	Body-island	chr5:87955638-87955864	NA	NA
cg10507988	-0.375796	0.713502	-20.8902	6.29879e-34	2.35762e-31	66.9142	0.9014	0.525605	-0.375796	2	46593271	R	I	EPAS1	Body	opensea	Body-opensea		NA	TRUE
cg20989480	-0.212052	0.796509	-20.8839	6.42713e-34	2.40119e-31	66.8941	0.902535	0.690483	-0.212052	11	32451461	R	II	WT1	Body	shore	Body-shore	chr11:32452144-32452708	NA	NA
cg13860281	0.533551	0.472301	20.8798	6.51338e-34	2.4244e-31	66.8809	0.205526	0.739077	0.533551	7	55638724	R	II	VOPP1	Body	shore	Body-shore	chr7:55639277-55640599	TRUE	NA
cg26385126	-0.230791	0.628982	-20.8792	6.5255e-34	2.42667e-31	66.879	0.744377	0.513587	-0.230791	12	124912021	F	I	NCOR2	Body	shore	Body-shore	chr12:124911243-124911464	TRUE	NA
cg21627409	-0.37357	0.330018	-20.8768	6.5768e-34	2.44349e-31	66.8712	0.516803	0.143233	-0.37357	5	140810106	F	I	PCDHGA4	Body	shore	Body-shore	chr5:140810494-140812617	TRUE	NA	low-CpG:140790256-140790651
cg22212237	-0.406923	0.405028	-20.8715	6.68799e-34	2.48251e-31	66.8545	0.608489	0.201566	-0.406923	12	49730055	R	II	C1QL4	1stExon	island	1stExon-island	chr12:49729728-49731162	NA	NA
cg12076463	-0.349253	0.479318	-20.8679	6.7666e-34	2.50937e-31	66.8429	0.653944	0.304691	-0.349253	4	85418265	R	I	NKX6-1	Body	island	Body-island	chr4:85417659-85420799	NA	TRUE
cg11969108	0.34297	0.49955	20.8673	6.78053e-34	2.51143e-31	66.8409	0.328064	0.671035	0.34297	7	154582418	F	II	DPP6	Body	shelf	Body-shelf	chr7:154585682-154586336	NA	NA
cg20542190	0.306581	0.453539	20.8628	6.87933e-34	2.54181e-31	66.8265	0.300248	0.606829	0.306581	19	54850619	R	II	LILRA4	TSS200	opensea	TSS200-opensea		NA	NA
cg22478310	-0.372739	0.435669	-20.8599	6.94248e-34	2.56077e-31	66.8174	0.622038	0.249299	-0.372739	6	100911744	R	II	SIM1	TSS200	shore	TSS200-shore	chr6:100912071-100913337	TRUE	TRUE
cg04291025	0.221607	0.179475	20.8471	7.23347e-34	2.66288e-31	66.7765	0.0686719	0.290279	0.221607	15	69746140	F	II	RPLP1	Body	shore	Body-shore	chr15:69745049-69745746	NA	NA
cg18022224	-0.473094	0.328995	-20.8459	7.2633e-34	2.67141e-31	66.7724	0.565542	0.0924483	-0.473094	2	176964404	F	II	HOXD12	TSS200	island	TSS200-island	chr2:176964062-176965509	NA	NA
cg13656408	0.441453	0.56917	20.8445	7.29419e-34	2.68033e-31	66.7682	0.348443	0.789896	0.441453	2	73161954	R	II	EMX1	3'UTR	opensea	3'UTR-opensea		TRUE	NA
cg01964852	-0.361525	0.469365	-20.8339	7.54912e-34	2.77147e-31	66.734	0.650127	0.288602	-0.361525	7	27146262	R	I	HOXA3	3'UTR	island	3'UTR-island	chr7:27146069-27146600	TRUE	NA
cg23381232	0.40686	0.54675	20.8276	7.70341e-34	2.82554e-31	66.7139	0.34332	0.75018	0.40686	7	95696973	R	II	DYNC1I1	Body	opensea	Body-opensea		NA	TRUE
cg11755933	-0.221462	0.838176	-20.8143	8.03967e-34	2.94083e-31	66.6714	0.948908	0.727445	-0.221462	11	67266128	R	I	PITPNM1	Body	shelf	Body-shelf	chr11:67260413-67262715	NA	NA
cg15513620	-0.386248	0.42067	-20.8105	8.13875e-34	2.96629e-31	66.6592	0.613794	0.227546	-0.386248	1	120174873	R	II	ZNF697	5'UTR	opensea	5'UTR-opensea		NA	TRUE
cg15935770	-0.472665	0.493758	-20.8061	8.25468e-34	3.00582e-31	66.6451	0.730091	0.257426	-0.472665	14	70160160	F	II	KIAA0247	Body	opensea	Body-opensea		NA	TRUE
cg26929355	-0.153711	0.682099	-20.7928	8.61531e-34	3.1343e-31	66.6025	0.758954	0.605243	-0.153711	16	69962827	F	I	WWP2	Body	opensea	Body-opensea		NA	TRUE		rs79993961
cg09404516	-0.276654	0.657833	-20.7862	8.80168e-34	3.19056e-31	66.5812	0.79616	0.519506	-0.276654	2	54832147	F	II	SPTBN1	Body	opensea	Body-opensea		NA	TRUE
cg03255182	-0.337836	0.358879	-20.7837	8.87235e-34	3.21328e-31	66.5733	0.527797	0.189961	-0.337836	12	54423566	F	I	HOXC4	5'UTR	island	5'UTR-island	chr12:54423427-54423712	NA	NA			rs61736613
cg16956686	-0.381585	0.530422	-20.7812	8.94535e-34	3.23681e-31	66.5651	0.721214	0.339629	-0.381585	7	4304779	F	I	SDK1	Body	island	Body-island	chr7:4303079-4305062	NA	NA
cg15455864	-0.30416	0.516643	-20.7766	9.07917e-34	3.28228e-31	66.5503	0.668724	0.364563	-0.30416	19	46319398	R	I	SYMPK	Body	shore	Body-shore	chr19:46318490-46319266	NA	NA
cg27039312	0.327819	0.73943	20.775	9.12465e-34	3.29576e-31	66.5454	0.57552	0.90334	0.327819	8	143625791	R	I	BAI1	3'UTR	island	3'UTR-island	chr8:143625625-143626162	NA	NA
cg12538674	-0.394875	0.668162	-20.7732	9.17765e-34	3.31193e-31	66.5396	0.8656	0.470725	-0.394875	7	27145972	R	II	HOXA3	3'UTR	shore	3'UTR-shore	chr7:27146069-27146600	TRUE	NA
cg19817912	-0.384834	0.661021	-20.7685	9.31721e-34	3.35928e-31	66.5246	0.853438	0.468604	-0.384834	7	27162768	F	II	HOXA3	5'UTR	shore	5'UTR-shore	chr7:27163819-27164098	NA	TRUE
cg06002516	-0.278422	0.766407	-20.7678	9.33995e-34	3.36446e-31	66.5222	0.905618	0.627196	-0.278422	12	57666521	R	II	R3HDM2	Body	opensea	Body-opensea		NA	TRUE
cg08243465	0.442358	0.560075	20.7498	9.89641e-34	3.55537e-31	66.4646	0.338896	0.781255	0.442358	20	56274036	F	II	PMEPA1	5'UTR	opensea	5'UTR-opensea		TRUE	NA
cg20016631	-0.347897	0.680988	-20.7457	1.003e-33	3.60015e-31	66.4512	0.854936	0.50704	-0.347897	4	38871320	R	II	FAM114A1	5'UTR	shore	5'UTR-shore	chr4:38869401-38869780	NA	NA
cg05726109	-0.241962	0.775485	-20.7451	1.00496e-33	3.60397e-31	66.4493	0.896466	0.654504	-0.241962	22	19709755	F	II	2019-09-05	Body	island	Body-island	chr22:19709081-19712106	NA	NA
cg24335895	-0.29935	0.644915	-20.7264	1.06723e-33	3.8103e-31	66.3894	0.79459	0.49524	-0.29935	19	36643771	F	II	COX7A1	TSS200	shore	TSS200-shore	chr19:36642327-36643585	TRUE	NA
cg05311410	-0.527967	0.314724	-20.7193	1.09201e-33	3.88567e-31	66.3666	0.578708	0.0507407	-0.527967	7	27225523	F	I	HOXA11AS	Body	island	Body-island	chr7:27225050-27225629	NA	NA		rs17427875
cg11229513	-0.395168	0.351078	-20.7026	1.15278e-33	4.09394e-31	66.3127	0.548662	0.153493	-0.395168	8	70984559	R	I	PRDM14	TSS1500	island	TSS1500-island	chr8:70981873-70984888	TRUE	NA
cg00737593	0.366961	0.732314	20.702	1.15507e-33	4.09843e-31	66.3107	0.548833	0.915794	0.366961	1	43422337	F	II	SLC2A1	Body	shore	Body-shore	chr1:43423467-43424768	NA	NA		rs78160850
cg09574499	-0.347237	0.729634	-20.7016	1.15637e-33	4.09944e-31	66.3096	0.903252	0.556015	-0.347237	7	27168962	R	II	HOXA4	Body	shore	Body-shore	chr7:27169572-27170638	NA	NA
cg11071207	-0.37758	0.369974	-20.691	1.19679e-33	4.23157e-31	66.2754	0.558764	0.181184	-0.37758	1	110611218	R	II	ALX3	Body	island	Body-island	chr1:110610265-110613303	NA	TRUE
cg22443762	-0.359184	0.594027	-20.6898	1.2014e-33	4.24285e-31	66.2716	0.773619	0.414435	-0.359184	1	197890608	F	II	LHX9	Body	island	Body-island	chr1:197890478-197890824	NA	NA
cg09999582	0.222529	0.184568	20.6896	1.20209e-33	4.24285e-31	66.271	0.0733036	0.295832	0.222529	2	103352711	R	II	MFSD9	Body	shore	Body-shore	chr2:103353138-103353414	NA	NA
cg19641327	0.301097	0.239216	20.6879	1.20867e-33	4.26048e-31	66.2656	0.0886674	0.389764	0.301097	5	15834770	R	II	FBXL7	Body	opensea	Body-opensea		NA	TRUE
cg24846030	-0.279272	0.726806	-20.6878	1.20921e-33	4.26048e-31	66.2651	0.866442	0.587169	-0.279272	6	30884683	F	II	VARS2	Body	shelf	Body-shelf	chr6:30881533-30882296	NA	NA
cg07512361	-0.314	0.680756	-20.6805	1.23804e-33	4.35063e-31	66.2417	0.837756	0.523756	-0.314	7	101944430	R	II	SH2B2	Body	island	Body-island	chr7:101943785-101944557	NA	NA
cg08012275	0.378858	0.731087	20.6788	1.24501e-33	4.37134e-31	66.2361	0.541659	0.920516	0.378858	11	1464300	F	I	BRSK2	Body	island	Body-island	chr11:1464295-1464899	NA	NA
cg13394216	-0.234857	0.762476	-20.6768	1.2529e-33	4.39518e-31	66.2298	0.879905	0.645047	-0.234857	6	1635808	R	I	GMDS	Body	opensea	Body-opensea		NA	NA
cg08042538	0.250854	0.273016	20.6578	1.33226e-33	4.65733e-31	66.1687	0.147589	0.398443	0.250854	20	821854	R	II	FAM110A	5'UTR	island	5'UTR-island	chr20:821674-822500	NA	NA
cg12506165	0.42986	0.440875	20.656	1.34038e-33	4.68167e-31	66.1626	0.225945	0.655805	0.42986	12	116997072	R	II	MAP1LC3B2	TSS200	opensea	TSS200-opensea		TRUE	TRUE
cg12969193	-0.431858	0.579543	-20.6496	1.36811e-33	4.77436e-31	66.1422	0.795472	0.363614	-0.431858	2	176988505	F	II	HOXD9	Body	shore	Body-shore	chr2:176989337-176989587	TRUE	NA
cg21092808	-0.357719	0.501794	-20.6454	1.38698e-33	4.83184e-31	66.1286	0.680654	0.322934	-0.357719	2	177029850	F	II	HOXD3	5'UTR	island	5'UTR-island	chr2:177029413-177029941	NA	NA
cg12349181	-0.282714	0.772265	-20.6443	1.39213e-33	4.84559e-31	66.1249	0.913622	0.630908	-0.282714	17	79057046	R	II	BAIAP2	Body	opensea	Body-opensea		TRUE	NA
cg24360871	-0.352085	0.731492	-20.6374	1.42351e-33	4.94627e-31	66.1027	0.907534	0.555449	-0.352085	7	27163929	F	II	HOXA3	5'UTR	island	5'UTR-island	chr7:27163819-27164098	NA	TRUE
cg20318166	-0.494796	0.397319	-20.6253	1.48028e-33	5.1214e-31	66.0638	0.644717	0.149921	-0.494796	15	85360664	R	I	ALPK3	1stExon	shore	1stExon-shore	chr15:85360192-85360574	TRUE	NA	high-CpG:83161576-83161714
cg04076817	0.404723	0.602336	20.617	1.52064e-33	5.2475e-31	66.037	0.399975	0.804698	0.404723	16	71571613	R	II	CHST4	Body	opensea	Body-opensea		TRUE	NA
cg13014333	0.248454	0.169187	20.6144	1.53332e-33	5.28673e-31	66.0287	0.0449599	0.293413	0.248454	6	31762776	F	II	VARS	Body	shore	Body-shore	chr6:31763240-31763905	NA	NA
cg02938320	-0.250025	0.581142	-20.6079	1.56635e-33	5.39598e-31	66.0075	0.706154	0.456129	-0.250025	2	223168178	F	II	CCDC140	5'UTR	shore	5'UTR-shore	chr2:223168653-223169008	NA	NA
cg05902503	-0.182363	0.844702	-20.5996	1.60882e-33	5.52809e-31	65.9809	0.935883	0.753521	-0.182363	16	30133175	R	II	MAPK3	Body	shore	Body-shore	chr16:30134220-30134488	NA	NA
cg12374506	-0.303593	0.498934	-20.5783	1.7238e-33	5.90396e-31	65.9122	0.65073	0.347137	-0.303593	12	49728243	R	I	C1QL4	Body	shore	Body-shore	chr12:49729728-49731162	NA	NA
cg13396738	0.207867	0.229046	20.5748	1.74367e-33	5.96089e-31	65.9008	0.125112	0.332979	0.207867	6	30850718	F	II	DDR1	TSS1500	shore	TSS1500-shore	chr6:30852102-30852676	NA	TRUE		rs11334273
cg05380734	-0.20338	0.65315	-20.5729	1.75461e-33	5.99323e-31	65.8946	0.75484	0.55146	-0.20338	17	76814805	F	II	USP36	Body	opensea	Body-opensea		NA	NA
cg03407567	0.269569	0.270651	20.5696	1.77315e-33	6.04117e-31	65.8841	0.135867	0.405435	0.269569	12	56545570	F	II	MYL6B	TSS1500	shore	TSS1500-shore	chr12:56546192-56546411	NA	NA
cg24411961	-0.354081	0.572919	-20.5632	1.81039e-33	6.1628e-31	65.8634	0.74996	0.395879	-0.354081	1	34642396	R	I	C1orf94	5'UTR	island	5'UTR-island	chr1:34642382-34643024	NA	NA			rs34457758
cg01525538	-0.3561	0.630343	-20.5554	1.85692e-33	6.30521e-31	65.8381	0.808393	0.452293	-0.3561	1	228785987	R	II	DUSP5P	Body	island	Body-island	chr1:228785986-228786204	NA	NA
cg13382100	0.187274	0.157305	20.5515	1.88057e-33	6.37474e-31	65.8255	0.0636676	0.250942	0.187274	12	132414849	R	II	PUS1	Body	shore	Body-shore	chr12:132413338-132414801	NA	NA
cg24398933	-0.189075	0.818537	-20.5443	1.92534e-33	6.51004e-31	65.8021	0.913075	0.724	-0.189075	1	151492569	R	II	CGN	Body	opensea	Body-opensea		NA	TRUE
cg25138553	-0.419126	0.577116	-20.5404	1.94945e-33	6.57501e-31	65.7897	0.786679	0.367553	-0.419126	1	22223841	F	II	HSPG2	Body	opensea	Body-opensea		TRUE	NA
cg16606320	-0.403961	0.559486	-20.5374	1.96871e-33	6.62886e-31	65.7799	0.761467	0.357505	-0.403961	4	56685972	R	II	LOC644145	TSS1500	opensea	TSS1500-opensea		NA	TRUE
cg22816343	-0.224679	0.801723	-20.525	2.04954e-33	6.88372e-31	65.7399	0.914062	0.689383	-0.224679	8	26243601	F	II	BNIP3L	Body	shelf	Body-shelf	chr8:26240290-26241017	NA	NA
cg16463460	-0.345243	0.573915	-20.5145	2.12102e-33	7.10601e-31	65.7058	0.746537	0.401294	-0.345243	11	32454718	R	II	WT1	Body	shore	Body-shore	chr11:32454874-32457311	NA	NA
cg26316946	-0.472714	0.328599	-20.5123	2.13642e-33	7.15166e-31	65.6986	0.564956	0.0922418	-0.472714	6	101846967	R	II	GRIK2	1stExon	island	1stExon-island	chr6:101846766-101847135	NA	NA
cg09703727	0.292363	0.414424	20.5095	2.15551e-33	7.20955e-31	65.6897	0.268243	0.560606	0.292363	7	69447465	F	II	AUTS2	Body	opensea	Body-opensea		NA	TRUE			rs67026139
cg10853830	-0.19141	0.855447	-20.5008	2.21741e-33	7.4043e-31	65.6615	0.951152	0.759742	-0.19141	11	67266176	R	I	PITPNM1	Body	shelf	Body-shelf	chr11:67260413-67262715	NA	NA		rs61755426
cg23512558	0.37137	0.357352	20.4993	2.22859e-33	7.43546e-31	65.6565	0.171667	0.543037	0.37137	12	116997079	R	II	MAP1LC3B2	TSS200	opensea	TSS200-opensea		TRUE	TRUE
cg08865099	-0.358472	0.633424	-20.492	2.28237e-33	7.60858e-31	65.6328	0.81266	0.454188	-0.358472	7	27281581	F	II	EVX1	TSS1500	shore	TSS1500-shore	chr7:27282086-27283136	NA	NA
cg09661370	-0.349087	0.438341	-20.486	2.32669e-33	7.74348e-31	65.6136	0.612885	0.263798	-0.349087	7	27225299	F	I	HOXA11AS	Body	island	Body-island	chr7:27225050-27225629	NA	NA
cg26796341	-0.249328	0.604846	-20.4843	2.33987e-33	7.78092e-31	65.608	0.72951	0.480182	-0.249328	6	100905691	R	II	SIM1	Body	island	Body-island	chr6:100905444-100905697	NA	NA
cg21185686	-0.439985	0.467674	-20.4812	2.3634e-33	7.85269e-31	65.598	0.687667	0.247682	-0.439985	5	140810433	R	II	PCDHGA4	Body	shore	Body-shore	chr5:140810494-140812617	TRUE	NA	low-CpG:140790256-140790651
cg26998537	-0.387252	0.56617	-20.4755	2.40795e-33	7.9941e-31	65.5795	0.759796	0.372544	-0.387252	14	57277366	F	II	OTX2	TSS200	shore	TSS200-shore	chr14:57278068-57278287	NA	NA
cg04316624	-0.343197	0.310023	-20.4745	2.41593e-33	8.01397e-31	65.5762	0.481622	0.138424	-0.343197	2	177036809	F	I	HOXD3	Body	island	Body-island	chr2:177036254-177037213	NA	TRUE
cg12892506	-0.505059	0.321302	-20.4727	2.43034e-33	8.05513e-31	65.5702	0.573832	0.0687721	-0.505059	3	147113918	R	I	ZIC4	Body	island	Body-island	chr3:147113608-147114479	NA	TRUE
cg09317554	-0.226208	0.823969	-20.4681	2.46654e-33	8.16169e-31	65.5555	0.937073	0.710865	-0.226208	4	151505084	F	II	LRBA	Body	island	Body-island	chr4:151504011-151505085	NA	NA
cg09937438	-0.3785	0.466611	-20.4668	2.47694e-33	8.18934e-31	65.5513	0.655861	0.277361	-0.3785	7	1095005	R	I	C7orf50	Body	shelf	Body-shelf	chr7:1097405-1097953	TRUE	NA
cg25944717	0.360926	0.550585	20.4622	2.51448e-33	8.30664e-31	65.5364	0.370122	0.731048	0.360926	5	180648843	F	II	TRIM41	TSS1500	shore	TSS1500-shore	chr5:180649487-180649768	NA	NA
cg24305156	-0.333044	0.565029	-20.4584	2.54622e-33	8.40459e-31	65.5239	0.731551	0.398507	-0.333044	11	45871936	F	II	CRY2	Body	shelf	Body-shelf	chr11:45868742-45869413	NA	NA
cg07648740	0.330741	0.437987	20.4527	2.59338e-33	8.55324e-31	65.5056	0.272617	0.603358	0.330741	7	154864630	F	II	HTR5A	Body	shore	Body-shore	chr7:154862680-154863245	NA	NA		rs76061152
cg01636354	-0.231288	0.814724	-20.4351	2.74659e-33	9.02895e-31	65.4485	0.930367	0.69908	-0.231288	3	134078647	R	II	AMOTL2	Body	shore	Body-shore	chr3:134080390-134080596	NA	NA
cg06430102	-0.192424	0.846855	-20.43	2.793e-33	9.17402e-31	65.4318	0.943067	0.750643	-0.192424	19	1151960	F	II	SBNO2	Body	shore	Body-shore	chr19:1152015-1152249	TRUE	NA
cg24000908	0.392369	0.534437	20.4257	2.83251e-33	9.28864e-31	65.4178	0.338252	0.730622	0.392369	5	1113358	F	II	SLC12A7	TSS1500	shore	TSS1500-shore	chr5:1111396-1112388	NA	NA
cg19909239	-0.418872	0.385813	-20.413	2.9523e-33	9.64215e-31	65.3765	0.595249	0.176377	-0.418872	4	111555503	F	II	PITX2	5'UTR	island	5'UTR-island	chr4:111554965-111555504	NA	NA
cg05329720	0.357229	0.612096	20.404	3.03967e-33	9.90338e-31	65.3475	0.433481	0.79071	0.357229	9	137718814	F	II	COL5A1	Body	shore	Body-shore	chr9:137719283-137719504	NA	NA
cg15991405	-0.401535	0.6188	-20.3968	3.11248e-33	1.01242e-30	65.3239	0.819568	0.418032	-0.401535	2	176988480	F	II	HOXD9	Body	shore	Body-shore	chr2:176989337-176989587	TRUE	TRUE
cg02925039	-0.433897	0.477134	-20.3922	3.15928e-33	1.02681e-30	65.3091	0.694082	0.260186	-0.433897	12	43945213	R	II	ADAMTS20	Body	island	Body-island	chr12:43944719-43946285	NA	TRUE			rs74084055
cg04951797	0.22966	0.209446	20.376	3.33158e-33	1.0802e-30	65.2562	0.0946165	0.324276	0.22966	3	20226964	F	II	SGOL1	5'UTR	shore	5'UTR-shore	chr3:20227289-20227956	NA	NA
cg00084338	-0.442772	0.474647	-20.3709	3.38745e-33	1.09621e-30	65.2397	0.696032	0.253261	-0.442772	6	170595920	F	I	DLL1	Body	shore	Body-shore	chr6:170597246-170597499	NA	NA			rs7759322
cg12483545	-0.454206	0.641731	-20.3708	3.38791e-33	1.09621e-30	65.2395	0.868834	0.414628	-0.454206	1	2198879	R	I	SKI	Body	opensea	Body-opensea		NA	NA
cg01789499	-0.27666	0.779011	-20.3683	3.41557e-33	1.10387e-30	65.2314	0.917341	0.640681	-0.27666	4	81109888	R	II	PRDM8	5'UTR	island	5'UTR-island	chr4:81109887-81110460	NA	NA
cg02052265	0.446692	0.519716	20.3457	3.67837e-33	1.18595e-30	65.1576	0.29637	0.743062	0.446692	1	247712110	F	II	C1orf150	TSS1500	opensea	TSS1500-opensea		NA	NA
cg25076197	-0.123172	0.884797	-20.3441	3.69752e-33	1.1911e-30	65.1524	0.946383	0.823211	-0.123172	7	104681440	F	II	MLL5	Body	opensea	Body-opensea		NA	NA	low-CpG:104468614-104468687
cg11700800	-0.389639	0.464942	-20.3438	3.70029e-33	1.1911e-30	65.1517	0.659762	0.270122	-0.389639	5	92906633	F	II	FLJ42709	Body	island	Body-island	chr5:92906239-92908875	NA	NA
cg08170227	-0.295474	0.579292	-20.3384	3.76651e-33	1.21145e-30	65.134	0.727029	0.431555	-0.295474	14	69422517	R	II	ACTN1	Body	opensea	Body-opensea		NA	TRUE
cg18694169	-0.320661	0.319064	-20.3311	3.85822e-33	1.23897e-30	65.1101	0.479395	0.158734	-0.320661	6	28227079	R	I	NKAPL	TSS200	island	TSS200-island	chr6:28226979-28227483	NA	NA	high-CpG:28335047-28335084
cg26253134	0.261563	0.260896	20.3277	3.90144e-33	1.25185e-30	65.099	0.130114	0.391677	0.261563	2	70751721	F	II	TGFA	Body	opensea	Body-opensea		TRUE	TRUE
cg20850602	0.323746	0.375623	20.3054	4.19593e-33	1.34099e-30	65.0265	0.21375	0.537496	0.323746	17	17379752	R	II	MED9	TSS1500	shore	TSS1500-shore	chr17:17380175-17380416	NA	NA
cg03825810	0.328994	0.664774	20.3047	4.20627e-33	1.34323e-30	65.0241	0.500276	0.829271	0.328994	3	38888170	F	II	SCN11A	3'UTR	opensea	3'UTR-opensea		NA	NA
cg02429905	-0.486623	0.535418	-20.2903	4.40976e-33	1.40487e-30	64.977	0.778729	0.292106	-0.486623	6	32119944	R	II	PRRT1	TSS1500	shore	TSS1500-shore	chr6:32121829-32122529	NA	TRUE
cg10657141	-0.374627	0.398862	-20.2893	4.42406e-33	1.40831e-30	64.9738	0.586175	0.211549	-0.374627	7	27225543	R	II	HOXA11AS	Body	island	Body-island	chr7:27225050-27225629	NA	NA
cg01242619	0.196839	0.172551	20.289	4.42877e-33	1.40869e-30	64.9728	0.0741318	0.270971	0.196839	8	145049472	F	II	PLEC1	Body	island	Body-island	chr8:145047293-145052305	TRUE	TRUE
cg09159452	-0.358419	0.716543	-20.2885	4.43587e-33	1.40984e-30	64.9712	0.895752	0.537333	-0.358419	7	2609861	R	I	IQCE	Body	opensea	Body-opensea		NA	NA
cg05501617	0.482727	0.523951	20.2831	4.51463e-33	1.43374e-30	64.9536	0.282587	0.765314	0.482727	4	185339075	R	II	IRF2	Body	opensea	Body-opensea		TRUE	TRUE
cg00963378	-0.466509	0.375834	-20.2816	4.53612e-33	1.43943e-30	64.9489	0.609089	0.14258	-0.466509	13	20716638	R	I	GJA3	Body	island	Body-island	chr13:20716137-20717372	NA	NA
cg03308399	-0.350491	0.59875	-20.2808	4.54831e-33	1.44216e-30	64.9462	0.773996	0.423505	-0.350491	7	27146237	R	I	HOXA3	3'UTR	island	3'UTR-island	chr7:27146069-27146600	TRUE	NA
cg05798501	-0.243617	0.787073	-20.2736	4.65669e-33	1.47536e-30	64.9228	0.908881	0.665264	-0.243617	7	30492171	R	I	NOD1	Body	opensea	Body-opensea		NA	NA
cg19720260	0.354213	0.416444	20.2724	4.67522e-33	1.47969e-30	64.9188	0.239337	0.59355	0.354213	11	114549291	F	II	FAM55B	5'UTR	opensea	5'UTR-opensea		NA	NA
cg14604681	-0.318704	0.540828	-20.2723	4.67772e-33	1.47969e-30	64.9183	0.70018	0.381476	-0.318704	2	63283355	R	II	OTX1	Body	shore	Body-shore	chr2:63283936-63284147	NA	NA
cg01258751	-0.411476	0.414363	-20.267	4.75945e-33	1.50436e-30	64.9011	0.620101	0.208625	-0.411476	6	100911949	F	II	SIM1	TSS1500	shore	TSS1500-shore	chr6:100912071-100913337	TRUE	TRUE
cg07116997	-0.434344	0.357388	-20.2665	4.76669e-33	1.50547e-30	64.8995	0.57456	0.140216	-0.434344	7	27225733	F	II	HOXA11AS	Body	shore	Body-shore	chr7:27227520-27229043	NA	NA
cg20970886	0.543501	0.597112	20.2643	4.80078e-33	1.51505e-30	64.8925	0.325362	0.868863	0.543501	3	192568714	F	II	C3orf59	Body	opensea	Body-opensea		NA	TRUE
cg07046818	-0.367052	0.501138	-20.2636	4.81185e-33	1.51712e-30	64.8902	0.684664	0.317612	-0.367052	8	97166291	F	II	GDF6	Body	shelf	Body-shelf	chr8:97169731-97170432	NA	TRUE
cg22098115	-0.438893	0.274552	-20.2635	4.8149e-33	1.51712e-30	64.8895	0.493999	0.0551059	-0.438893	2	131721768	R	I	ARHGEF4	Body	island	Body-island	chr2:131720819-131721867	TRUE	NA
cg09640621	0.365068	0.69733	20.2583	4.89646e-33	1.54162e-30	64.8728	0.514796	0.879864	0.365068	10	129346391	R	II	NPS	TSS1500	opensea	TSS1500-opensea		NA	NA
cg19656282	-0.431505	0.312368	-20.2537	4.97168e-33	1.56285e-30	64.8576	0.528121	0.0966155	-0.431505	2	74742786	F	I	TLX2	Body	island	Body-island	chr2:74740455-74743795	NA	NA
cg05942022	0.40832	0.636793	20.2479	5.06616e-33	1.59131e-30	64.8389	0.432633	0.840952	0.40832	1	43402591	F	II	SLC2A1	Body	opensea	Body-opensea		TRUE	TRUE		rs78925955
cg04404694	0.308291	0.388654	20.2441	5.1313e-33	1.60926e-30	64.8262	0.234509	0.5428	0.308291	14	37236997	R	II	SLC25A21	Body	opensea	Body-opensea		NA	TRUE			rs76778101
cg04915044	-0.575323	0.439871	-20.2436	5.1387e-33	1.61032e-30	64.8247	0.727533	0.152209	-0.575323	2	86263895	F	II	POLR1A	Body	opensea	Body-opensea		TRUE	TRUE		rs3770088
cg06476693	0.407433	0.643765	20.2315	5.3472e-33	1.67046e-30	64.7851	0.440048	0.847482	0.407433	11	130283454	F	II	ADAMTS8	Body	opensea	Body-opensea		TRUE	TRUE
cg18404374	-0.3735	0.600584	-20.2282	5.40624e-33	1.68759e-30	64.7742	0.787334	0.413834	-0.3735	3	26663551	R	II	LRRC3B	TSS1500	shore	TSS1500-shore	chr3:26664104-26664796	NA	NA
cg00938540	0.420321	0.681531	20.217	5.6088e-33	1.74405e-30	64.7376	0.47137	0.891691	0.420321	20	61166085	F	II	C20orf166	Body	opensea	Body-opensea		NA	NA
cg07857469	-0.319999	0.574351	-20.2088	5.7601e-33	1.78834e-30	64.711	0.73435	0.414351	-0.319999	4	81107185	F	II	PRDM8	5'UTR	shore	5'UTR-shore	chr4:81104761-81105527	NA	NA
cg18080509	-0.239613	0.706541	-20.2012	5.90645e-33	1.82954e-30	64.6861	0.826347	0.586734	-0.239613	6	74009455	F	II	C6orf147	Body	island	Body-island	chr6:74008820-74009456	NA	TRUE
cg14548272	-0.388304	0.505297	-20.1968	5.99214e-33	1.85465e-30	64.6717	0.699448	0.311145	-0.388304	8	99961122	F	II	OSR2	5'UTR	island	5'UTR-island	chr8:99960497-99961438	NA	NA
cg00431187	-0.39745	0.691041	-20.195	6.02785e-33	1.86427e-30	64.6658	0.889766	0.492316	-0.39745	7	27161749	R	II	HOXA3	5'UTR	shore	5'UTR-shore	chr7:27162087-27162426	NA	NA
cg00300672	0.384533	0.516757	20.1914	6.101e-33	1.88545e-30	64.6538	0.324491	0.709024	0.384533	2	125077436	R	II	CNTNAP5	Body	opensea	Body-opensea		NA	TRUE
cg27434368	-0.325761	0.613578	-20.1903	6.12208e-33	1.89051e-30	64.6504	0.776458	0.450697	-0.325761	19	19650978	R	II	CILP2	Body	island	Body-island	chr19:19650683-19651274	NA	NA
cg02810967	0.28201	0.40513	20.1887	6.15427e-33	1.89754e-30	64.6451	0.264125	0.546135	0.28201	4	17813558	F	II	NCAPG	Body	shore	Body-shore	chr4:17811954-17813227	NA	NA
cg01585096	0.318754	0.551807	20.1869	6.19144e-33	1.90754e-30	64.6391	0.39243	0.711184	0.318754	19	35981517	F	II	KRTDAP	TSS200	opensea	TSS200-opensea		NA	NA
cg03286774	-0.216159	0.781439	-20.1764	6.40884e-33	1.9715e-30	64.6048	0.889519	0.673359	-0.216159	16	89590357	R	I	SPG7	Body	shore	Body-shore	chr16:89588816-89589058	NA	NA
cg07936950	-0.5015	0.430049	-20.1717	6.50917e-33	1.9993e-30	64.5893	0.680799	0.179299	-0.5015	2	172953134	F	I	DLX1	3'UTR	island	3'UTR-island	chr2:172952809-172953160	NA	NA		rs3821186
cg24004532	0.172332	0.145565	20.1675	6.59952e-33	2.02396e-30	64.5756	0.0593991	0.231731	0.172332	6	53517075	F	II	KLHL31	Body	island	Body-island	chr6:53516319-53517076	NA	TRUE
cg24406391	-0.235319	0.689691	-20.163	6.69764e-33	2.04781e-30	64.5609	0.80735	0.572031	-0.235319	1	155938911	F	II	ARHGEF2	Body	opensea	Body-opensea		NA	TRUE
cg17136011	-0.301952	0.461502	-20.1587	6.79387e-33	2.07409e-30	64.5467	0.612478	0.310526	-0.301952	10	123908897	F	II	TACC2	Body	opensea	Body-opensea		TRUE	TRUE
cg21031917	0.407917	0.608614	20.1485	7.02503e-33	2.1414e-30	64.5134	0.404656	0.812573	0.407917	6	62596341	R	II	KHDRBS2	Body	opensea	Body-opensea		NA	TRUE
cg24272697	-0.248783	0.810202	-20.1336	7.37813e-33	2.24364e-30	64.4645	0.934593	0.68581	-0.248783	7	27159883	R	II	HOXA3	5'UTR	shelf	5'UTR-shelf	chr7:27162087-27162426	NA	NA
cg25738529	-0.212527	0.475331	-20.1334	7.38273e-33	2.24364e-30	64.4639	0.581594	0.369067	-0.212527	12	49938018	F	I	KCNH3	Body	opensea	Body-opensea		NA	NA
cg19924619	-0.375018	0.265331	-20.1323	7.40952e-33	2.25008e-30	64.4603	0.45284	0.0778225	-0.375018	1	165323692	R	I	LMX1A	Body	island	Body-island	chr1:165323486-165323811	NA	NA
cg22146357	0.370545	0.319871	20.1296	7.47665e-33	2.26705e-30	64.4513	0.134599	0.505144	0.370545	8	143781406	R	II	LY6K	TSS200	shore	TSS200-shore	chr8:143781581-143782609	TRUE	TRUE
cg10055566	-0.275331	0.589896	-20.1289	7.49204e-33	2.27e-30	64.4493	0.727562	0.452231	-0.275331	6	28227220	F	II	NKAPL	1stExon	island	1stExon-island	chr6:28226979-28227483	NA	NA
cg03602297	0.311039	0.450275	20.1267	7.54695e-33	2.28492e-30	64.442	0.294755	0.605794	0.311039	2	30142128	F	II	ALK	Body	shore	Body-shore	chr2:30142831-30144624	NA	NA
cg08113562	0.230566	0.148145	20.1248	7.59392e-33	2.29741e-30	64.4358	0.0328623	0.263428	0.230566	17	43508428	F	II	SH3D20	5'UTR	island	5'UTR-island	chr17:43506828-43510380	NA	NA
cg08082763	-0.208217	0.767801	-20.1217	7.67209e-33	2.31932e-30	64.4256	0.87191	0.663693	-0.208217	16	11073063	F	II	CLEC16A	Body	opensea	Body-opensea		NA	TRUE
cg18421840	0.350322	0.523929	20.1213	7.68267e-33	2.32077e-30	64.4242	0.348768	0.69909	0.350322	7	31099814	F	II	ADCYAP1R1	5'UTR	opensea	5'UTR-opensea		NA	TRUE		rs58896249
cg01262413	0.38011	0.664271	20.1103	7.96726e-33	2.40313e-30	64.388	0.474216	0.854325	0.38011	7	157691541	R	II	PTPRN2	Body	shore	Body-shore	chr7:157690559-157690770	NA	NA
cg09039672	-0.363729	0.683274	-20.1093	7.99421e-33	2.40946e-30	64.3846	0.865138	0.501409	-0.363729	12	52367989	F	II	ACVR1B	Body	opensea	Body-opensea		NA	TRUE
cg21879102	-0.291416	0.744188	-20.1087	8.00872e-33	2.41202e-30	64.3828	0.889896	0.59848	-0.291416	12	120241409	F	II	CIT	Body	shore	Body-shore	chr12:120241921-120242233	NA	NA
cg27463181	0.404423	0.673494	20.1064	8.07003e-33	2.42867e-30	64.3752	0.471283	0.875705	0.404423	12	130258121	F	I	TMEM132D	Body	opensea	Body-opensea		NA	TRUE
cg14032033	0.424975	0.747538	20.0973	8.31477e-33	2.50045e-30	64.3455	0.535051	0.960025	0.424975	1	241371615	F	II	RGS7	Body	opensea	Body-opensea		NA	TRUE		rs10926432
cg23663547	-0.457565	0.464609	-20.0951	8.37679e-33	2.51722e-30	64.3381	0.693392	0.235827	-0.457565	17	38710320	R	II	CCR7	3'UTR	opensea	3'UTR-opensea		NA	NA
cg16794506	-0.416195	0.312338	-20.0943	8.39777e-33	2.52164e-30	64.3356	0.520435	0.10424	-0.416195	2	119600002	F	I	EN1	3'UTR	island	3'UTR-island	chr2:119599458-119600966	NA	NA
cg14882265	-0.375546	0.606065	-20.0934	8.42219e-33	2.52709e-30	64.3327	0.793838	0.418292	-0.375546	7	27184375	F	II	HOXA5	TSS1500	island	TSS1500-island	chr7:27182613-27185562	NA	NA
cg20945085	-0.327182	0.581442	-20.0894	8.53474e-33	2.55895e-30	64.3195	0.745033	0.417851	-0.327182	2	74875227	R	I	C2orf65	TSS200	island	TSS200-island	chr2:74875128-74875562	NA	NA
cg20431250	-0.488094	0.436389	-20.0888	8.55207e-33	2.56224e-30	64.3175	0.680436	0.192342	-0.488094	6	108492653	F	II	NR2E1	Body	shore	Body-shore	chr6:108491033-108491410	NA	NA
cg06926703	0.373597	0.646145	20.0862	8.62607e-33	2.58249e-30	64.3089	0.459347	0.832944	0.373597	12	120030574	R	II	TMEM233	TSS1500	shore	TSS1500-shore	chr12:120031494-120033212	NA	NA
cg21491201	0.302362	0.482963	20.0836	8.69972e-33	2.6026e-30	64.3004	0.331782	0.634144	0.302362	7	30545074	R	II	GGCT	TSS1500	shore	TSS1500-shore	chr7:30543984-30545005	NA	NA
cg22531371	0.287028	0.284731	20.0794	8.82146e-33	2.63706e-30	64.2866	0.141217	0.428245	0.287028	1	155162756	F	II	MUC1	TSS200	shore	TSS200-shore	chr1:155163434-155163818	NA	NA
cg06370771	-0.540378	0.343244	-20.0745	8.96448e-33	2.67584e-30	64.2706	0.613433	0.0730551	-0.540378	1	18960940	F	II	PAX7	Body	shore	Body-shore	chr1:18962842-18963481	NA	NA
cg16676676	0.356726	0.711152	20.0671	9.18564e-33	2.73982e-30	64.2463	0.532788	0.889515	0.356726	1	228558987	F	I	OBSCN	Body	island	Body-island	chr1:228558945-228559246	NA	NA
cg16852704	-0.403835	0.336276	-20.0649	9.25266e-33	2.75776e-30	64.2391	0.538193	0.134358	-0.403835	2	74743243	F	II	TLX2	Body	island	Body-island	chr2:74740455-74743795	NA	NA
cg08423533	-0.405521	0.421155	-20.0621	9.34137e-33	2.78215e-30	64.2295	0.623915	0.218395	-0.405521	10	28030628	F	II	MKX	Body	island	Body-island	chr10:28030182-28035211	NA	NA
cg09506661	-0.202039	0.864044	-20.0614	9.36008e-33	2.78566e-30	64.2276	0.965064	0.763024	-0.202039	19	1152022	F	II	SBNO2	Body	island	Body-island	chr19:1152015-1152249	TRUE	NA
cg01794555	0.243657	0.163471	20.0527	9.635e-33	2.86324e-30	64.1987	0.0416425	0.2853	0.243657	13	46742767	R	II	LCP1	5'UTR	opensea	5'UTR-opensea		NA	NA			rs41284159
cg02194129	-0.223948	0.722394	-20.0516	9.66845e-33	2.87106e-30	64.1953	0.834368	0.61042	-0.223948	14	104171313	F	II	XRCC3	Body	opensea	Body-opensea		NA	NA		rs3212070
cg26084949	0.260202	0.170838	20.0404	1.00325e-32	2.97478e-30	64.1585	0.0407367	0.300938	0.260202	14	75039090	F	II	LTBP2	Body	opensea	Body-opensea		TRUE	TRUE
cg01295399	-0.235449	0.50975	-20.0378	1.01207e-32	2.99651e-30	64.1497	0.627474	0.392026	-0.235449	10	50820278	R	I	SLC18A3	1stExon	island	1stExon-island	chr10:50817601-50820356	NA	TRUE
cg21779805	-0.3656	0.665864	-20.036	1.01822e-32	3.01249e-30	64.1437	0.848664	0.483064	-0.3656	3	187982495	R	II	LPP	5'UTR	opensea	5'UTR-opensea		NA	TRUE
cg03352106	-0.484803	0.520707	-20.0297	1.03966e-32	3.07369e-30	64.123	0.763108	0.278305	-0.484803	12	21926476	R	I	KCNJ8	Body	opensea	Body-opensea		NA	NA
cg12251075	0.299056	0.309607	20.0285	1.04362e-32	3.08313e-30	64.1192	0.160079	0.459135	0.299056	17	49244717	R	II	NME2	Body	shore	Body-shore	chr17:49243620-49244647	NA	NA
cg27099358	0.28892	0.67262	20.0258	1.05288e-32	3.10818e-30	64.1104	0.528159	0.81708	0.28892	16	1118909	R	I	LOC146336	Body	shore	Body-shore	chr16:1120153-1120441	TRUE	NA
cg05626536	0.412122	0.470653	20.0184	1.0791e-32	3.17404e-30	64.0859	0.264592	0.676715	0.412122	8	144801088	F	I	MAPK15	Body	island	Body-island	chr8:144800957-144801335	NA	NA			rs74800153
cg05970721	0.453441	0.624756	20.0184	1.07913e-32	3.17404e-30	64.0858	0.398035	0.851476	0.453441	16	22926625	F	I	HS3ST2	Body	island	Body-island	chr16:22926343-22926639	NA	NA
cg09880291	-0.328758	0.745292	-20.0096	1.11109e-32	3.26089e-30	64.0568	0.909671	0.580913	-0.328758	7	27184109	F	II	HOXA5	TSS1500	island	TSS1500-island	chr7:27182613-27185562	NA	NA
cg18121003	-0.494875	0.377357	-20.0061	1.12387e-32	3.296e-30	64.0454	0.624795	0.12992	-0.494875	11	86085757	F	I	CCDC81	TSS200	island	TSS200-island	chr11:86085693-86086006	NA	TRUE
cg26080154	-0.216086	0.696961	-20.0012	1.1424e-32	3.34304e-30	64.0291	0.805004	0.588918	-0.216086	11	1314228	R	I	TOLLIP	Body	shore	Body-shore	chr11:1315467-1317115	NA	NA
cg04982781	0.307806	0.534866	20.0001	1.1465e-32	3.3526e-30	64.0255	0.380963	0.688768	0.307806	22	39714193	R	II	RPL3	Body	shore	Body-shore	chr22:39715473-39715945	NA	NA
cg23434592	0.37058	0.534204	19.9929	1.17389e-32	3.42336e-30	64.002	0.348914	0.719494	0.37058	8	139489757	R	II	FAM135B	5'UTR	opensea	5'UTR-opensea		NA	NA
cg12419685	-0.167146	0.83489	-19.9929	1.1741e-32	3.42336e-30	64.0018	0.918463	0.751317	-0.167146	20	33451367	R	I	GGT7	Body	island	Body-island	chr20:33451148-33451374	NA	TRUE
cg01802532	0.315735	0.323069	19.9878	1.19416e-32	3.47932e-30	63.985	0.165202	0.480937	0.315735	4	56475905	R	II	NMU	Body	opensea	Body-opensea		TRUE	TRUE
cg23044884	-0.458738	0.501732	-19.9853	1.20383e-32	3.50494e-30	63.9769	0.731101	0.272363	-0.458738	8	30245145	F	II	RBPMS	Body	shelf	Body-shelf	chr8:30241416-30242878	NA	NA
cg17473782	0.367052	0.786963	19.9848	1.20577e-32	3.50806e-30	63.9753	0.603437	0.970489	0.367052	13	114780772	R	II	RASA3	Body	island	Body-island	chr13:114780692-114781048	NA	NA			rs2274717
cg23097402	-0.416519	0.436807	-19.9805	1.22311e-32	3.55593e-30	63.9611	0.645066	0.228547	-0.416519	1	50883394	F	I	DMRTA2	3'UTR	island	3'UTR-island	chr1:50882997-50883426	NA	NA
cg10759648	0.312255	0.447643	19.9791	1.22888e-32	3.56756e-30	63.9564	0.291515	0.603771	0.312255	11	132374480	F	II	OPCML	Body	opensea	Body-opensea		NA	TRUE		rs73033761
cg20080624	-0.410077	0.522661	-19.9665	1.28139e-32	3.71731e-30	63.9147	0.727699	0.317622	-0.410077	7	96651111	F	II	DLX5	Body	island	Body-island	chr7:96650221-96651551	NA	NA
cg14377922	-0.307583	0.714169	-19.9626	1.29802e-32	3.76015e-30	63.9019	0.867961	0.560377	-0.307583	2	23840537	F	II	KLHL29	Body	opensea	Body-opensea		TRUE	NA		rs80351465
cg21049958	0.387791	0.610109	19.9611	1.30421e-32	3.77265e-30	63.8972	0.416213	0.804005	0.387791	19	42134128	R	II	CEACAM4	TSS1500	opensea	TSS1500-opensea		NA	NA
cg19926250	0.465275	0.638726	19.959	1.31364e-32	3.79717e-30	63.89	0.406088	0.871363	0.465275	3	151034474	F	II	GPR87	5'UTR	opensea	5'UTR-opensea		NA	NA
cg18949666	-0.202367	0.71046	-19.955	1.33118e-32	3.84236e-30	63.8768	0.811643	0.609276	-0.202367	4	170187451	R	II	SH3RF1	Body	shelf	Body-shelf	chr4:170191357-170192844	NA	NA
cg24541426	-0.313066	0.407733	-19.9543	1.33399e-32	3.84771e-30	63.8747	0.564267	0.2512	-0.313066	2	177029459	R	I	HOXD3	5'UTR	island	5'UTR-island	chr2:177029413-177029941	NA	TRUE
cg21179088	-0.524434	0.488847	-19.9527	1.34116e-32	3.86561e-30	63.8693	0.751064	0.22663	-0.524434	7	54612333	R	II	VSTM2A	Body	island	Body-island	chr7:54612324-54612558	NA	NA
cg14204619	0.37421	0.742946	19.9523	1.34286e-32	3.86775e-30	63.8681	0.555841	0.930051	0.37421	11	1469370	R	I	BRSK2	Body	shore	Body-shore	chr11:1470033-1470388	NA	NA
cg08582485	-0.520761	0.421176	-19.9476	1.36399e-32	3.92579e-30	63.8525	0.681557	0.160795	-0.520761	20	22557518	R	II	C20orf56	Body	island	Body-island	chr20:22557517-22559240	NA	NA
cg14264194	-0.297806	0.397316	-19.9428	1.38612e-32	3.98095e-30	63.8365	0.546219	0.248413	-0.297806	1	211652549	R	I	RD3	Body	island	Body-island	chr1:211652306-211652754	NA	NA
cg18176723	-0.436677	0.557574	-19.9369	1.41314e-32	4.05567e-30	63.8173	0.775913	0.339235	-0.436677	15	75336436	F	II	PPCDC	Body	opensea	Body-opensea		TRUE	TRUE
cg13316404	0.302602	0.665464	19.9272	1.45947e-32	4.17968e-30	63.7851	0.514163	0.816765	0.302602	10	6191076	F	II	PFKFB3	Body	shelf	Body-shelf	chr10:6186520-6187855	NA	NA
cg11772799	0.366763	0.582501	19.9261	1.46468e-32	4.19161e-30	63.7816	0.39912	0.765883	0.366763	7	158799715	R	II	LOC154822	TSS1500	shore	TSS1500-shore	chr7:158798591-158799434	NA	NA
cg10628035	0.422218	0.651389	19.9227	1.48142e-32	4.23652e-30	63.7703	0.44028	0.862498	0.422218	2	6086404	F	II	LOC150622	Body	opensea	Body-opensea		NA	TRUE
cg10184289	0.370104	0.382379	19.9156	1.51661e-32	4.33406e-30	63.7469	0.197327	0.567431	0.370104	2	64870490	R	II	SERTAD2	5'UTR	opensea	5'UTR-opensea		TRUE	TRUE
cg12280113	0.360453	0.610968	19.9104	1.54299e-32	4.40631e-30	63.7297	0.430741	0.791194	0.360453	19	56250127	R	II	NLRP9	TSS1500	opensea	TSS1500-opensea		NA	NA
cg00926215	-0.319001	0.266025	-19.9092	1.54939e-32	4.41833e-30	63.7256	0.425526	0.106525	-0.319001	2	223162049	R	I	PAX3	Body	shore	Body-shore	chr2:223162946-223163912	NA	NA
cg13460556	-0.286297	0.734648	-19.9022	1.58589e-32	4.516e-30	63.7024	0.877796	0.591499	-0.286297	15	89709638	F	II	ABHD2	Body	opensea	Body-opensea		NA	TRUE
cg15151059	-0.197825	0.82502	-19.9001	1.59678e-32	4.54059e-30	63.6956	0.923933	0.726108	-0.197825	1	150936875	R	II	SETDB1	3'UTR	opensea	3'UTR-opensea		NA	NA
cg17432857	-0.453919	0.60455	-19.8997	1.59915e-32	4.54414e-30	63.6941	0.83151	0.377591	-0.453919	7	27184438	R	II	HOXA5	TSS1500	island	TSS1500-island	chr7:27182613-27185562	NA	NA
cg00737840	-0.514247	0.361877	-19.8974	1.61144e-32	4.57583e-30	63.6865	0.619001	0.104754	-0.514247	11	125036420	R	II	PKNOX2	5'UTR	island	5'UTR-island	chr11:125034896-125036426	NA	NA
cg10640333	-0.37366	0.509547	-19.8923	1.63888e-32	4.65046e-30	63.6696	0.696377	0.322717	-0.37366	2	63280625	R	I	OTX1	Body	shore	Body-shore	chr2:63281034-63281347	NA	NA
cg15732768	-0.423396	0.486292	-19.8904	1.64901e-32	4.67261e-30	63.6635	0.69799	0.274594	-0.423396	7	96651537	F	II	DLX5	Body	island	Body-island	chr7:96650221-96651551	NA	NA
cg17128799	0.374024	0.551073	19.8869	1.66825e-32	4.72381e-30	63.6519	0.364061	0.738085	0.374024	1	2458466	R	II	PANK4	TSS1500	shore	TSS1500-shore	chr1:2457241-2458259	NA	NA
cg23633856	-0.352673	0.63815	-19.8815	1.69869e-32	4.8037e-30	63.6339	0.814487	0.461814	-0.352673	1	170636363	R	II	PRRX1	Body	shelf	Body-shelf	chr1:170633274-170634178	NA	NA			rs4656219
cg17107017	-0.191673	0.85794	-19.8815	1.69886e-32	4.8037e-30	63.6338	0.953777	0.762104	-0.191673	1	116925613	F	II	ATP1A1	TSS1500	opensea	TSS1500-opensea		NA	NA
cg19295314	-0.260369	0.663623	-19.8741	1.7408e-32	4.91886e-30	63.6095	0.793807	0.533438	-0.260369	6	1635640	F	II	GMDS	Body	opensea	Body-opensea		NA	NA
cg18430152	-0.33353	0.715594	-19.8721	1.7525e-32	4.94842e-30	63.6029	0.882358	0.548829	-0.33353	7	27162401	R	II	HOXA3	5'UTR	island	5'UTR-island	chr7:27162087-27162426	NA	NA
cg15359390	0.352308	0.546877	19.8715	1.75616e-32	4.95528e-30	63.6008	0.370723	0.723031	0.352308	2	79365892	F	II	REG1P	TSS1500	opensea	TSS1500-opensea		NA	NA		rs79415825
cg01610231	-0.505902	0.330815	-19.8631	1.80587e-32	5.09199e-30	63.573	0.583766	0.0778642	-0.505902	4	111555314	R	II	PITX2	5'UTR	island	5'UTR-island	chr4:111554965-111555504	NA	NA
cg08080489	0.410674	0.672465	19.853	1.86755e-32	5.25486e-30	63.5395	0.467128	0.877802	0.410674	11	132526947	F	II	OPCML	Body	opensea	Body-opensea		NA	NA
cg00739667	-0.26492	0.642634	-19.8486	1.89519e-32	5.32891e-30	63.5249	0.775094	0.510174	-0.26492	16	81731648	F	I	CMIP	Body	opensea	Body-opensea		NA	NA
cg27122614	0.223469	0.407261	19.845	1.91805e-32	5.38942e-30	63.513	0.295526	0.518995	0.223469	7	157913741	R	II	PTPRN2	Body	opensea	Body-opensea		NA	NA
cg08465307	0.4144	0.455902	19.8407	1.94535e-32	5.45849e-30	63.4989	0.248701	0.663102	0.4144	1	3827081	R	I	LOC100133612	Body	shelf	Body-shelf	chr1:3824219-3824456	NA	NA
cg15503081	0.408688	0.473763	19.8382	1.96145e-32	5.49983e-30	63.4907	0.269418	0.678107	0.408688	19	12992867	F	II	DNASE2	TSS1500	shore	TSS1500-shore	chr19:12991690-12992508	NA	NA		rs1210384
cg17187764	0.419888	0.685394	19.8365	1.97252e-32	5.52317e-30	63.4851	0.47545	0.895338	0.419888	12	7818654	F	II	APOBEC1	TSS200	opensea	TSS200-opensea		NA	NA
cg20501518	-0.586357	0.40804	-19.8217	2.07242e-32	5.79083e-30	63.4358	0.701218	0.114861	-0.586357	3	157821919	R	II	SHOX2	Body	shore	Body-shore	chr3:157822973-157823836	NA	TRUE
cg26297005	-0.418314	0.655071	-19.8192	2.08939e-32	5.83418e-30	63.4277	0.864228	0.445914	-0.418314	7	27162090	F	II	HOXA3	5'UTR	island	5'UTR-island	chr7:27162087-27162426	NA	NA
cg04778178	-0.430983	0.584692	-19.8189	2.09165e-32	5.83645e-30	63.4266	0.800183	0.3692	-0.430983	7	27162294	R	I	HOXA3	5'UTR	island	5'UTR-island	chr7:27162087-27162426	NA	NA
cg01780984	-0.209973	0.681828	-19.8172	2.10387e-32	5.86648e-30	63.4208	0.786815	0.576842	-0.209973	17	79058859	R	II	BAIAP2	Body	opensea	Body-opensea		NA	NA
cg12798040	-0.321938	0.623894	-19.8153	2.11679e-32	5.8984e-30	63.4147	0.784863	0.462925	-0.321938	14	104171840	R	I	XRCC3	Body	opensea	Body-opensea		NA	NA
cg09813400	-0.226111	0.733289	-19.8039	2.19887e-32	6.11076e-30	63.3768	0.846344	0.620233	-0.226111	5	150431636	R	II	TNIP1	Body	opensea	Body-opensea		NA	TRUE
cg05287314	0.197068	0.226804	19.8038	2.19946e-32	6.11076e-30	63.3766	0.12827	0.325339	0.197068	20	822198	F	II	FAM110A	5'UTR	island	5'UTR-island	chr20:821674-822500	NA	NA
cg08204023	-0.587873	0.384626	-19.8021	2.21248e-32	6.13954e-30	63.3707	0.678563	0.0906897	-0.587873	5	37835109	F	II	GDNF	5'UTR	island	5'UTR-island	chr5:37834671-37835128	TRUE	TRUE
cg27246129	-0.355991	0.475641	-19.7941	2.27182e-32	6.29986e-30	63.3443	0.653637	0.297646	-0.355991	6	170595947	F	I	DLL1	Body	shore	Body-shore	chr6:170597246-170597499	NA	TRUE
cg09479241	0.204954	0.188337	19.7898	2.30477e-32	6.37717e-30	63.33	0.08586	0.290814	0.204954	17	27052676	F	I	TLCD1	Body	shore	Body-shore	chr17:27052941-27054084	TRUE	NA
cg15513743	-0.262081	0.355527	-19.7894	2.30791e-32	6.37797e-30	63.3286	0.486568	0.224487	-0.262081	1	119528688	R	I	TBX15	5'UTR	shore	5'UTR-shore	chr1:119529819-119530712	NA	NA
cg15424989	-0.2067	0.820696	-19.7888	2.31238e-32	6.38593e-30	63.3267	0.924046	0.717346	-0.2067	18	19757468	F	II	GATA6	Body	shore	Body-shore	chr18:19756794-19757080	NA	NA
cg08402365	-0.435232	0.404316	-19.7884	2.31518e-32	6.38928e-30	63.3255	0.621932	0.1867	-0.435232	2	172945274	R	I	MAP1D	3'UTR	island	3'UTR-island	chr2:172944988-172945384	NA	NA
cg17250863	-0.206369	0.830742	-19.7881	2.3175e-32	6.39131e-30	63.3245	0.933927	0.727558	-0.206369	20	33451272	F	I	GGT7	Body	island	Body-island	chr20:33451148-33451374	NA	TRUE
cg07582829	0.23395	0.332897	19.7842	2.34789e-32	6.46937e-30	63.3115	0.215922	0.449871	0.23395	19	54408440	R	II	PRKCG	Body	shore	Body-shore	chr19:54409966-54410200	NA	NA
cg17277615	-0.221959	0.780361	-19.7841	2.34903e-32	6.46937e-30	63.311	0.89134	0.669381	-0.221959	10	22843847	R	II	PIP4K2A	Body	opensea	Body-opensea		NA	TRUE
cg03163783	-0.419677	0.511291	-19.779	2.38893e-32	6.57477e-30	63.2943	0.721129	0.301453	-0.419677	2	200326591	R	II	SATB2	TSS1500	island	TSS1500-island	chr2:200320502-200329681	NA	NA
cg17611742	0.379755	0.3947	19.77	2.46199e-32	6.77122e-30	63.2643	0.204822	0.584577	0.379755	1	197745238	R	II	DENND1B	TSS1500	shore	TSS1500-shore	chr1:197743931-197744788	NA	TRUE
cg11783356	0.338654	0.591063	19.7564	2.5758e-32	7.0649e-30	63.2192	0.421736	0.76039	0.338654	20	44313418	F	II	WFDC10B	3'UTR	opensea	3'UTR-opensea		NA	NA
cg14507337	-0.424884	0.314146	-19.7556	2.58304e-32	7.07512e-30	63.2164	0.526588	0.101704	-0.424884	14	60978161	F	I	SIX6	3'UTR	island	3'UTR-island	chr14:60975732-60978180	NA	NA
cg12325536	-0.306056	0.360763	-19.7543	2.59462e-32	7.10199e-30	63.212	0.513791	0.207735	-0.306056	5	87968658	R	I	LOC645323	Body	island	Body-island	chr5:87968635-87968907	NA	NA
cg01323954	0.254394	0.224139	19.7403	2.71802e-32	7.41959e-30	63.1657	0.0969415	0.351336	0.254394	15	83654524	F	II	FAM103A1	TSS1500	shore	TSS1500-shore	chr15:83654590-83655245	NA	NA
cg01673674	-0.340504	0.584414	-19.7395	2.72546e-32	7.43485e-30	63.163	0.754666	0.414162	-0.340504	8	97166036	R	II	GDF6	Body	shelf	Body-shelf	chr8:97169731-97170432	NA	NA
cg16961816	-0.357632	0.452656	-19.736	2.75752e-32	7.5172e-30	63.1513	0.631473	0.27384	-0.357632	7	96633530	R	I	DLX6AS	Body	shore	Body-shore	chr7:96634622-96634915	NA	NA
cg20614854	0.333207	0.487264	19.7322	2.79266e-32	7.60786e-30	63.1387	0.320661	0.653868	0.333207	17	71331689	F	II	SDK2	3'UTR	opensea	3'UTR-opensea		NA	TRUE
cg12626956	-0.433038	0.431885	-19.719	2.91839e-32	7.92891e-30	63.0948	0.648404	0.215366	-0.433038	9	79634509	R	II	FOXB2	TSS200	island	TSS200-island	chr9:79633326-79636030	NA	NA			rs72209201
cg12252069	-0.454182	0.557339	-19.7125	2.98264e-32	8.09798e-30	63.0731	0.78443	0.330248	-0.454182	7	26897597	R	II	SKAP2	Body	opensea	Body-opensea		NA	TRUE
cg01182863	0.392325	0.766119	19.7073	3.03517e-32	8.23506e-30	63.0557	0.569957	0.962281	0.392325	11	1464792	F	I	BRSK2	Body	island	Body-island	chr11:1464295-1464899	NA	NA
cg14523847	-0.44737	0.382991	-19.7027	3.08214e-32	8.35365e-30	63.0404	0.606675	0.159306	-0.44737	7	153584597	R	I	DPP6	1stExon	island	1stExon-island	chr7:153583317-153585666	NA	NA
cg25352836	-0.361555	0.437624	-19.699	3.12073e-32	8.45009e-30	63.028	0.618402	0.256847	-0.361555	19	19625264	R	I	TSSK6	3'UTR	island	3'UTR-island	chr19:19624954-19627258	NA	NA
cg08907118	-0.206383	0.740866	-19.6981	3.12955e-32	8.46827e-30	63.0252	0.844057	0.637674	-0.206383	16	27482516	F	II	GTF3C1	Body	opensea	Body-opensea		TRUE	TRUE
cg02897989	-0.534941	0.359484	-19.6915	3.1995e-32	8.64595e-30	63.0032	0.626955	0.0920138	-0.534941	1	170637723	F	II	PRRX1	Body	shelf	Body-shelf	chr1:170633274-170634178	NA	NA
cg17421805	0.346627	0.648681	19.6888	3.22826e-32	8.7178e-30	62.9943	0.475368	0.821995	0.346627	1	159781662	R	II	FCRL6	Body	opensea	Body-opensea		NA	NA
cg19071452	0.459284	0.347863	19.6875	3.24308e-32	8.75196e-30	62.9897	0.118221	0.577505	0.459284	2	152146944	F	II	NMI	TSS1500	shore	TSS1500-shore	chr2:152145869-152146319	TRUE	NA
cg15541630	-0.341525	0.450751	-19.6791	3.33462e-32	8.98426e-30	62.962	0.621513	0.279988	-0.341525	8	87081770	F	I	PSKH2	1stExon	island	1stExon-island	chr8:87081653-87082046	NA	NA
cg06640630	-0.246872	0.745195	-19.6688	3.45223e-32	9.27903e-30	62.9275	0.868631	0.621759	-0.246872	1	211652276	R	II	RD3	3'UTR	shore	3'UTR-shore	chr1:211652306-211652754	NA	NA
cg22970357	-0.396909	0.513884	-19.6683	3.45756e-32	9.28326e-30	62.9259	0.712339	0.31543	-0.396909	2	119600408	R	II	EN1	3'UTR	island	3'UTR-island	chr2:119599458-119600966	NA	NA
cg00799748	-0.193101	0.82333	-19.6683	3.45842e-32	9.28326e-30	62.9257	0.91988	0.726779	-0.193101	16	1611052	F	I	IFT140	Body	opensea	Body-opensea		NA	NA
cg25500444	-0.433797	0.420323	-19.6678	3.4631e-32	9.28964e-30	62.9243	0.637222	0.203424	-0.433797	11	86086101	R	II	CCDC81	1stExon	shore	1stExon-shore	chr11:86085693-86086006	NA	TRUE
cg20553124	-0.416884	0.341785	-19.6676	3.46593e-32	9.29103e-30	62.9235	0.550227	0.133343	-0.416884	6	36253157	R	II	PNPLA1	5'UTR	opensea	5'UTR-opensea		NA	NA
cg03982801	-0.257217	0.746761	-19.6647	3.49943e-32	9.37458e-30	62.9139	0.87537	0.618153	-0.257217	7	27168688	R	II	HOXA4	3'UTR	shore	3'UTR-shore	chr7:27169572-27170638	NA	NA
cg06083330	-0.421995	0.286943	-19.6637	3.51205e-32	9.40214e-30	62.9104	0.49794	0.0759452	-0.421995	4	147561203	F	I	POU4F2	Body	island	Body-island	chr4:147559205-147561901	NA	TRUE
cg14205001	-0.175553	0.848096	-19.6582	3.57628e-32	9.56135e-30	62.8923	0.935873	0.760319	-0.175553	9	139406515	R	II	NOTCH1	Body	shore	Body-shore	chr9:139405089-139405292	NA	NA
cg01832036	-0.404019	0.27629	-19.6576	3.58448e-32	9.57125e-30	62.89	0.478299	0.0742806	-0.404019	17	48050274	R	I	DLX4	Body	island	Body-island	chr17:48048953-48050616	NA	NA
cg21000072	-0.283795	0.247825	-19.6575	3.58474e-32	9.57125e-30	62.8899	0.389723	0.105928	-0.283795	1	3567408	R	I	WDR8	TSS1500	island	TSS1500-island	chr1:3566445-3569636	NA	NA
cg09159022	-0.488092	0.405872	-19.6554	3.60995e-32	9.63218e-30	62.883	0.649917	0.161826	-0.488092	8	4849522	F	II	CSMD1	Body	island	Body-island	chr8:4848968-4852635	NA	NA
cg17760049	-0.235937	0.827881	-19.6545	3.62108e-32	9.64909e-30	62.8799	0.945849	0.709912	-0.235937	7	4774448	F	I	FOXK1	Body	opensea	Body-opensea		NA	NA
cg21286967	-0.348087	0.522926	-19.6535	3.6339e-32	9.67683e-30	62.8764	0.69697	0.348882	-0.348087	6	31696710	F	II	DDAH2	Body	island	Body-island	chr6:31695894-31698245	NA	NA
cg17489312	0.318737	0.577123	19.6516	3.65694e-32	9.73174e-30	62.8701	0.417755	0.736492	0.318737	1	9376039	F	II	SPSB1	5'UTR	opensea	5'UTR-opensea		TRUE	NA
cg07730329	-0.352867	0.618493	-19.6499	3.67753e-32	9.78006e-30	62.8645	0.794926	0.442059	-0.352867	5	140810137	F	II	PCDHGA4	Body	shore	Body-shore	chr5:140810494-140812617	TRUE	NA	low-CpG:140790256-140790651
cg13285387	-0.36235	0.710641	-19.6494	3.68359e-32	9.78971e-30	62.8628	0.891817	0.529466	-0.36235	2	168863366	R	II	STK39	Body	opensea	Body-opensea		NA	TRUE
cg11320144	0.336317	0.519582	19.6448	3.74071e-32	9.92841e-30	62.8475	0.351423	0.68774	0.336317	20	1975276	R	II	PDYN	TSS1500	opensea	TSS1500-opensea		NA	NA
cg19866866	-0.467155	0.393758	-19.6432	3.7609e-32	9.97541e-30	62.8421	0.627335	0.16018	-0.467155	1	182026044	R	I	ZNF648	Body	island	Body-island	chr1:182025604-182026511	NA	NA
cg17723299	0.153758	0.167084	19.6417	3.77944e-32	1.0018e-29	62.8372	0.0902053	0.243963	0.153758	1	197744929	R	I	DENND1B	TSS1500	shore	TSS1500-shore	chr1:197743931-197744788	NA	TRUE	high-CpG:196010757-196011580
cg05524387	0.343644	0.655843	19.6345	3.87216e-32	1.02488e-29	62.8131	0.484021	0.827665	0.343644	8	141107113	F	II	TRAPPC9	Body	shore	Body-shore	chr8:141107837-141110984	NA	NA
cg00472520	-0.210785	0.771478	-19.6335	3.88546e-32	1.02719e-29	62.8097	0.87687	0.666085	-0.210785	17	79006834	F	II	FLJ90757	Body	island	Body-island	chr17:79006584-79006835	NA	NA		rs11870986
cg14214165	-0.308365	0.707184	-19.6332	3.88912e-32	1.02749e-29	62.8087	0.861367	0.553002	-0.308365	2	218777482	R	II	TNS1	5'UTR	opensea	5'UTR-opensea		NA	TRUE
cg12041387	-0.537633	0.438838	-19.6299	3.93285e-32	1.03836e-29	62.7976	0.707654	0.170021	-0.537633	7	96650171	R	II	DLX5	Body	shore	Body-shore	chr7:96650221-96651551	NA	NA
cg00549561	-0.140278	0.833054	-19.6249	3.99809e-32	1.0542e-29	62.7812	0.903193	0.762915	-0.140278	16	22296110	F	II	EEF2K	3'UTR	opensea	3'UTR-opensea		NA	TRUE
cg14175690	-0.371515	0.41101	-19.6233	4.0202e-32	1.05934e-29	62.7757	0.596768	0.225252	-0.371515	1	119527638	R	I	TBX15	5'UTR	shore	5'UTR-shore	chr1:119526782-119527192	NA	NA			rs73011329
cg05543520	-0.332553	0.687372	-19.62	4.06523e-32	1.0691e-29	62.7646	0.853649	0.521096	-0.332553	3	66500703	R	II	LRIG1	Body	opensea	Body-opensea		NA	TRUE
cg16930728	0.347742	0.628342	19.6185	4.08602e-32	1.07387e-29	62.7595	0.454471	0.802214	0.347742	8	139735524	F	II	COL22A1	Body	opensea	Body-opensea		NA	NA			rs74821630
cg21198455	-0.276503	0.76363	-19.6152	4.1309e-32	1.08424e-29	62.7487	0.901881	0.625378	-0.276503	9	131679993	R	I	LRRC8A	3'UTR	opensea	3'UTR-opensea		NA	NA
cg05805172	-0.24146	0.718553	-19.6109	4.19141e-32	1.09869e-29	62.7342	0.839283	0.597823	-0.24146	10	104417083	R	II	TRIM8	Body	island	Body-island	chr10:104416555-104417165	NA	NA
cg05771369	-0.388647	0.408943	-19.6095	4.21055e-32	1.10299e-29	62.7296	0.603266	0.214619	-0.388647	12	58021713	R	I	B4GALNT1	Body	island	Body-island	chr12:58021294-58022037	NA	TRUE
cg11912239	-0.175819	0.809505	-19.608	4.23136e-32	1.107e-29	62.7247	0.897414	0.721596	-0.175819	17	76220608	F	I	BIRC5	3'UTR	opensea	3'UTR-opensea		NA	NA		rs2856269
cg17863076	0.340867	0.524721	19.597	4.39009e-32	1.14704e-29	62.688	0.354288	0.695155	0.340867	2	79312664	R	II	REG1B	Body	opensea	Body-opensea		NA	NA
cg25243008	-0.307177	0.56093	-19.5849	4.57218e-32	1.18998e-29	62.6475	0.714519	0.407341	-0.307177	17	59554806	F	I	TBX4	Body	opensea	Body-opensea		NA	NA
cg07182163	0.392146	0.702983	19.5792	4.66134e-32	1.21005e-29	62.6283	0.50691	0.899056	0.392146	14	79511907	R	II	NRXN3	Body	opensea	Body-opensea		NA	TRUE
cg04721098	0.296805	0.574174	19.5789	4.66598e-32	1.21031e-29	62.6273	0.425772	0.722577	0.296805	16	24265703	R	II	CACNG3	TSS1500	shore	TSS1500-shore	chr16:24267040-24267527	NA	NA
cg09934056	0.269292	0.171455	19.5785	4.6718e-32	1.21042e-29	62.6261	0.0368086	0.306101	0.269292	19	8400203	R	II	KANK3	Body	island	Body-island	chr19:8397958-8400461	NA	NA
cg19501190	-0.179715	0.86502	-19.5692	4.82014e-32	1.24725e-29	62.5949	0.954877	0.775162	-0.179715	11	73021274	F	II	ARHGEF17	1stExon	shore	1stExon-shore	chr11:73018452-73020563	NA	NA
cg27313941	-0.223007	0.730334	-19.5687	4.82897e-32	1.24873e-29	62.5931	0.841838	0.618831	-0.223007	7	27186554	F	II	HOXA6	Body	shore	Body-shore	chr7:27186927-27187692	NA	NA		rs11983200
cg24402165	-0.146567	0.85583	-19.5684	4.83344e-32	1.24909e-29	62.5922	0.929113	0.782547	-0.146567	11	27427559	R	II	LGR4	Body	opensea	Body-opensea		NA	TRUE
cg11086982	-0.448392	0.285358	-19.5638	4.90872e-32	1.26691e-29	62.5768	0.509554	0.0611622	-0.448392	14	73736972	F	I	PAPLN	Body	opensea	Body-opensea		TRUE	TRUE			rs60449567
cg08335767	0.259392	0.29427	19.5625	4.92963e-32	1.27149e-29	62.5725	0.164574	0.423966	0.259392	6	34206495	F	II	HMGA1	5'UTR	shore	5'UTR-shore	chr6:34202567-34206193	NA	NA
cg15226029	-0.144507	0.838945	-19.5609	4.95695e-32	1.2769e-29	62.567	0.911198	0.766691	-0.144507	6	32151731	F	II	AGER	Body	opensea	Body-opensea		NA	NA			rs17846804
cg08649068	-0.177847	0.805008	-19.5565	5.03087e-32	1.29512e-29	62.5523	0.893931	0.716084	-0.177847	17	38512297	F	II	RARA	Body	opensea	Body-opensea		NA	NA
cg10231746	0.319839	0.417	19.556	5.03801e-32	1.29613e-29	62.5509	0.25708	0.576919	0.319839	17	3337719	R	II	OR1E2	TSS1500	opensea	TSS1500-opensea		NA	NA
cg06097704	-0.28935	0.690319	-19.5554	5.04863e-32	1.29803e-29	62.5488	0.834994	0.545643	-0.28935	17	820939	F	I	NXN	Body	opensea	Body-opensea		NA	NA
cg02421734	0.380074	0.568388	19.5548	5.05817e-32	1.29965e-29	62.5469	0.378351	0.758425	0.380074	19	55172736	F	II	LILRB4	TSS1500	opensea	TSS1500-opensea		NA	NA			rs36220640
cg16372520	0.357023	0.35981	19.5529	5.09184e-32	1.3058e-29	62.5403	0.181298	0.538321	0.357023	14	78869751	F	II	NRXN3	TSS1500	opensea	TSS1500-opensea		NA	NA
cg06372887	-0.164247	0.60776	-19.5435	5.2547e-32	1.3467e-29	62.5089	0.689884	0.525636	-0.164247	7	44795754	R	I	ZMIZ2	TSS200	opensea	TSS200-opensea		NA	NA
cg03377767	0.401895	0.573037	19.542	5.28158e-32	1.35273e-29	62.5038	0.37209	0.773984	0.401895	2	17997138	F	II	MSGN1	TSS1500	opensea	TSS1500-opensea		NA	NA
cg03408619	-0.274684	0.69466	-19.5417	5.28615e-32	1.35304e-29	62.503	0.832002	0.557318	-0.274684	8	30300142	R	I	RBPMS	Body	opensea	Body-opensea		NA	NA
cg15701111	-0.225464	0.794771	-19.5408	5.30296e-32	1.35648e-29	62.4998	0.907503	0.682039	-0.225464	12	52685334	R	II	KRT81	TSS200	shore	TSS200-shore	chr12:52684945-52685222	NA	NA
cg11201447	0.58126	0.457191	19.539	5.33462e-32	1.36371e-29	62.4939	0.166561	0.747821	0.58126	8	128808063	F	II	MIR1204	TSS200	shore	TSS200-shore	chr8:128806081-128806899	NA	NA
cg12362629	-0.202369	0.829223	-19.5309	5.48127e-32	1.39854e-29	62.4668	0.930408	0.728039	-0.202369	22	36716469	F	II	MYH9	Body	shore	Body-shore	chr22:36718450-36718760	NA	NA
cg09399225	0.385161	0.579177	19.5308	5.48476e-32	1.39854e-29	62.4662	0.386596	0.771757	0.385161	9	123007911	F	II	MIR147	TSS1500	opensea	TSS1500-opensea		NA	NA
cg04276626	0.423552	0.391223	19.5301	5.49737e-32	1.4007e-29	62.4639	0.179447	0.602998	0.423552	17	57918500	F	II	MIR21	TSS200	opensea	TSS200-opensea		NA	NA
cg10025586	0.500775	0.446884	19.5195	5.69665e-32	1.44798e-29	62.4284	0.196497	0.697272	0.500775	15	83501699	F	II	WHAMM	Body	opensea	Body-opensea		TRUE	TRUE		rs11259952
cg25652701	-0.452673	0.524151	-19.5159	5.76484e-32	1.46439e-29	62.4166	0.750487	0.297814	-0.452673	7	105348517	F	II	ATXN7L1	Body	opensea	Body-opensea		NA	TRUE
cg15431544	-0.436352	0.358894	-19.5155	5.77401e-32	1.46579e-29	62.415	0.57707	0.140719	-0.436352	7	27225476	R	II	HOXA11AS	Body	island	Body-island	chr7:27225050-27225629	NA	NA
cg03547017	-0.269563	0.686081	-19.512	5.84133e-32	1.48102e-29	62.4034	0.820863	0.5513	-0.269563	17	37031281	R	II	LASP1	Body	opensea	Body-opensea		NA	NA
cg14575739	0.38912	0.687071	19.508	5.92031e-32	1.50009e-29	62.3901	0.492511	0.881631	0.38912	19	55098069	F	II	LILRA2	Body	opensea	Body-opensea		NA	NA
cg03918304	-0.433121	0.564639	-19.5077	5.92655e-32	1.50073e-29	62.389	0.781199	0.348078	-0.433121	2	176981654	F	II	HOXD10	1stExon	shore	1stExon-shore	chr2:176982107-176982402	NA	NA
cg01875106	0.365273	0.364944	19.5063	5.95553e-32	1.50712e-29	62.3841	0.182308	0.547581	0.365273	11	132287342	R	II	OPCML	3'UTR	opensea	3'UTR-opensea		NA	NA
cg20798152	-0.276896	0.496439	-19.5042	5.99722e-32	1.51576e-29	62.3772	0.634887	0.357991	-0.276896	5	71014900	R	II	CARTPT	TSS200	shore	TSS200-shore	chr5:71014917-71015715	NA	NA
cg22989843	-0.508823	0.398022	-19.5004	6.07384e-32	1.53417e-29	62.3645	0.652434	0.14361	-0.508823	2	223154201	F	II	PAX3	Body	shore	Body-shore	chr2:223155726-223156154	NA	NA
cg02311374	0.403749	0.743173	19.4953	6.17895e-32	1.55876e-29	62.3474	0.541299	0.945048	0.403749	16	31383136	R	I	ITGAX	Body	island	Body-island	chr16:31382926-31383139	NA	NA
cg24310780	0.414775	0.709153	19.493	6.22712e-32	1.56992e-29	62.3397	0.501765	0.91654	0.414775	1	165256615	R	II	LMX1A	Body	opensea	Body-opensea		NA	TRUE
cg07977202	-0.247215	0.588096	-19.4884	6.32443e-32	1.59147e-29	62.3243	0.711704	0.464489	-0.247215	11	66311348	R	I	ZDHHC24	Body	shore	Body-shore	chr11:66313169-66313822	NA	NA
cg22274117	0.48799	0.348135	19.4875	6.343e-32	1.59415e-29	62.3213	0.10414	0.59213	0.48799	6	16713613	F	II	ATXN1	5'UTR	opensea	5'UTR-opensea		NA	TRUE		rs75654158
cg20731469	-0.413073	0.293155	-19.4784	6.54048e-32	1.63968e-29	62.2908	0.499692	0.0866186	-0.413073	6	108495678	R	II	NR2E1	Body	island	Body-island	chr6:108495654-108495986	TRUE	NA
cg20282814	0.432751	0.697401	19.476	6.59332e-32	1.6519e-29	62.2828	0.481025	0.913776	0.432751	1	43423072	F	II	SLC2A1	Body	shore	Body-shore	chr1:43423467-43424768	NA	NA		rs79316235
cg07419011	-0.236059	0.7536	-19.4748	6.6199e-32	1.65753e-29	62.2788	0.871629	0.63557	-0.236059	12	120688060	F	II	PXN	Body	opensea	Body-opensea		NA	NA
cg08460399	0.283115	0.284743	19.4659	6.82171e-32	1.70699e-29	62.2488	0.143185	0.4263	0.283115	20	42879935	R	II	GDAP1L1	Body	shelf	Body-shelf	chr20:42875764-42876184	NA	NA
cg12606911	-0.478615	0.48122	-19.4637	6.87355e-32	1.7189e-29	62.2413	0.720528	0.241913	-0.478615	2	87036626	R	I	CD8A	TSS1500	island	TSS1500-island	chr2:87036600-87037001	NA	NA
cg19196335	-0.303198	0.748754	-19.4621	6.90962e-32	1.72684e-29	62.2361	0.900353	0.597156	-0.303198	7	27184094	F	II	HOXA5	TSS1500	island	TSS1500-island	chr7:27182613-27185562	NA	NA
cg12386297	0.418546	0.501277	19.4594	6.97371e-32	1.74178e-29	62.2269	0.292004	0.71055	0.418546	1	209605223	R	II	LOC642587	Body	opensea	Body-opensea		NA	NA
cg00876196	0.33702	0.596493	19.4592	6.97895e-32	1.742e-29	62.2261	0.427983	0.765003	0.33702	19	55315034	R	II	KIR2DL4	TSS200	opensea	TSS200-opensea		NA	NA
cg02580005	-0.224994	0.813553	-19.4589	6.98463e-32	1.74234e-29	62.2253	0.92605	0.701056	-0.224994	4	151504187	F	II	LRBA	Body	island	Body-island	chr4:151504011-151505085	NA	TRUE
cg03053579	-0.432335	0.39032	-19.457	7.02907e-32	1.75234e-29	62.219	0.606488	0.174153	-0.432335	10	102987483	R	II	LBX1	Body	island	Body-island	chr10:102984182-102990063	NA	NA
cg15231462	0.422979	0.709385	19.4563	7.04722e-32	1.75578e-29	62.2164	0.497895	0.920874	0.422979	1	247769251	R	II	OR2G3	1stExon	opensea	1stExon-opensea		NA	NA
cg21488279	-0.215141	0.572532	-19.4522	7.14567e-32	1.7792e-29	62.2026	0.680103	0.464962	-0.215141	5	122434178	F	I	PRDM6	Body	island	Body-island	chr5:122433878-122435551	NA	NA
cg19321018	0.249699	0.209588	19.4493	7.21569e-32	1.79553e-29	62.1929	0.0847382	0.334437	0.249699	12	15942969	F	II	EPS8	TSS1500	shore	TSS1500-shore	chr12:15941718-15942740	NA	NA
cg17780246	-0.317268	0.430874	-19.4488	7.22638e-32	1.79708e-29	62.1914	0.589508	0.27224	-0.317268	19	54481467	R	I	CACNG8	Body	island	Body-island	chr19:54481412-54481955	TRUE	NA
cg13019143	-0.435654	0.433899	-19.4447	7.32754e-32	1.82111e-29	62.1776	0.651726	0.216072	-0.435654	7	96633060	R	II	DLX6AS	Body	shore	Body-shore	chr7:96634622-96634915	NA	NA
cg15985470	0.249192	0.454196	19.4441	7.34206e-32	1.82359e-29	62.1756	0.3296	0.578792	0.249192	12	4554756	R	II	FGF6	5'UTR	shore	5'UTR-shore	chr12:4554405-4554624	NA	NA
cg25882256	-0.311014	0.462197	-19.4424	7.38372e-32	1.83228e-29	62.1699	0.617704	0.30669	-0.311014	1	25257759	R	I	RUNX3	TSS1500	island	TSS1500-island	chr1:25255527-25259005	NA	NA			rs79211218
cg02050917	-0.313559	0.639214	-19.4373	7.51283e-32	1.86141e-29	62.1527	0.795994	0.482435	-0.313559	1	2173571	F	I	SKI	Body	opensea	Body-opensea		NA	NA
cg04250451	-0.275493	0.584585	-19.4365	7.5343e-32	1.86558e-29	62.1498	0.722331	0.446838	-0.275493	1	25257784	F	I	RUNX3	TSS1500	island	TSS1500-island	chr1:25255527-25259005	NA	NA
cg07705639	0.271756	0.24439	19.4357	7.55446e-32	1.86942e-29	62.1472	0.108512	0.380268	0.271756	1	174992861	R	II	MRPS14	TSS1500	shore	TSS1500-shore	chr1:174992365-174992796	NA	NA
cg21410293	-0.278631	0.746768	-19.4347	7.57948e-32	1.87446e-29	62.1439	0.886084	0.607453	-0.278631	18	46386361	F	I	KIAA0427	3'UTR	island	3'UTR-island	chr18:46386266-46386481	NA	TRUE
cg12894524	0.423283	0.396653	19.4343	7.58824e-32	1.87547e-29	62.1427	0.185011	0.608294	0.423283	12	116997069	R	II	MAP1LC3B2	TSS200	opensea	TSS200-opensea		TRUE	TRUE
cg16026549	-0.209211	0.833427	-19.4306	7.68475e-32	1.89504e-29	62.1301	0.938032	0.728822	-0.209211	6	32800519	F	I	TAP2	Body	opensea	Body-opensea		NA	NA
cg27539480	-0.182071	0.831587	-19.4305	7.68626e-32	1.89504e-29	62.1299	0.922623	0.740552	-0.182071	7	27147084	R	II	HOXA3	3'UTR	shore	3'UTR-shore	chr7:27147589-27148389	NA	NA
cg10637995	0.348783	0.485306	19.4277	7.76059e-32	1.9122e-29	62.1203	0.310914	0.659697	0.348783	20	31781151	R	II	BASE	TSS1500	opensea	TSS1500-opensea		NA	NA
cg06379876	-0.257071	0.822422	-19.4255	7.81905e-32	1.92542e-29	62.1129	0.950958	0.693886	-0.257071	1	41220106	F	I	NFYC	Body	opensea	Body-opensea		NA	NA		rs41268091
cg08136772	-0.334658	0.35789	-19.4244	7.84747e-32	1.93006e-29	62.1092	0.525219	0.190561	-0.334658	13	53420933	R	I	PCDH8	1stExon	island	1stExon-island	chr13:53419897-53422872	TRUE	NA
cg01109169	-0.437237	0.41578	-19.4235	7.87081e-32	1.93462e-29	62.1063	0.634398	0.197161	-0.437237	2	71134630	F	II	VAX2	Body	island	Body-island	chr2:71134585-71134792	NA	TRUE
cg15786205	-0.327101	0.569271	-19.416	8.07184e-32	1.98282e-29	62.0812	0.732822	0.405721	-0.327101	6	108495578	F	II	NR2E1	Body	shore	Body-shore	chr6:108495654-108495986	TRUE	NA
cg15446391	-0.282639	0.68587	-19.4152	8.09398e-32	1.98704e-29	62.0784	0.827189	0.54455	-0.282639	11	32452370	F	II	WT1	Body	island	Body-island	chr11:32452144-32452708	NA	NA
cg16935980	-0.464342	0.497118	-19.4062	8.34421e-32	2.04225e-29	62.0481	0.729289	0.264947	-0.464342	7	155255310	F	II	EN2	Body	island	Body-island	chr7:155255098-155255311	NA	NA		rs2361689	rs56008230
cg11856711	0.138286	0.126739	19.3991	8.54595e-32	2.08908e-29	62.0243	0.0575953	0.195882	0.138286	12	54785309	R	I	ZNF385A	TSS1500	shore	TSS1500-shore	chr12:54784900-54785238	TRUE	NA
cg02213103	-0.534496	0.573817	-19.395	8.66663e-32	2.11473e-29	62.0103	0.841064	0.306569	-0.534496	3	181421548	R	II	SOX2OT	Body	opensea	Body-opensea		NA	TRUE
cg08506931	-0.389901	0.474624	-19.3893	8.83415e-32	2.1543e-29	61.9912	0.669575	0.279674	-0.389901	2	223168861	R	II	CCDC140	Body	island	Body-island	chr2:223168653-223169008	NA	NA
cg08835113	-0.559973	0.424771	-19.3842	8.98635e-32	2.1872e-29	61.9742	0.704758	0.144784	-0.559973	7	96650192	R	II	DLX5	Body	shore	Body-shore	chr7:96650221-96651551	NA	NA
cg06857094	0.313564	0.398798	19.3841	8.99082e-32	2.1872e-29	61.9737	0.242016	0.555579	0.313564	6	31762442	F	II	VARS	Body	shore	Body-shore	chr6:31763240-31763905	NA	NA
cg06555227	0.398187	0.639033	19.3809	9.08919e-32	2.20713e-29	61.9629	0.439939	0.838126	0.398187	7	157366979	F	II	PTPRN2	Body	shelf	Body-shelf	chr7:157369120-157369394	NA	NA
cg18740359	0.399554	0.600733	19.3784	9.16415e-32	2.22399e-29	61.9547	0.400956	0.80051	0.399554	19	56393163	R	II	NLRP4	3'UTR	opensea	3'UTR-opensea		NA	NA
cg15838320	0.42351	0.652875	19.37	9.42913e-32	2.28416e-29	61.9263	0.44112	0.864631	0.42351	20	49461129	R	II	BCAS4	Body	shelf	Body-shelf	chr20:49457137-49457342	TRUE	NA
cg01492538	-0.21816	0.757192	-19.366	9.55926e-32	2.31429e-29	61.9126	0.866272	0.648112	-0.21816	7	2774543	R	II	GNA12	Body	island	Body-island	chr7:2774444-2774655	NA	NA
cg19701577	-0.28172	0.767079	-19.3602	9.7461e-32	2.35245e-29	61.8933	0.907939	0.626219	-0.28172	7	27181418	R	II	HOXA5	3'UTR	shore	3'UTR-shore	chr7:27182613-27185562	TRUE	NA			rs1047290
cg16408865	0.264294	0.325322	19.3561	9.88345e-32	2.38274e-29	61.8794	0.193175	0.457468	0.264294	12	69753119	F	I	YEATS4	TSS1500	shore	TSS1500-shore	chr12:69753445-69754088	NA	NA
cg08569678	0.39036	0.301714	19.3554	9.90576e-32	2.38669e-29	61.8771	0.106534	0.496894	0.39036	8	143781397	R	II	LY6K	TSS200	shore	TSS200-shore	chr8:143781581-143782609	NA	TRUE
cg24387380	0.349074	0.693156	19.3538	9.96023e-32	2.39838e-29	61.8717	0.518619	0.867693	0.349074	15	27159158	R	II	GABRA5	Body	opensea	Body-opensea		NA	NA
cg03422527	-0.145614	0.672578	-19.351	1.00554e-31	2.41986e-29	61.8622	0.745384	0.599771	-0.145614	6	32154568	F	I	PBX2	Body	opensea	Body-opensea		NA	NA
cg22152605	0.387562	0.587431	19.3505	1.00737e-31	2.42281e-29	61.8604	0.39365	0.781212	0.387562	19	52253373	R	II	FPR1	5'UTR	opensea	5'UTR-opensea		NA	NA
cg08693172	-0.465226	0.507555	-19.3495	1.01079e-31	2.42957e-29	61.857	0.740167	0.274942	-0.465226	19	46526333	F	II	PGLYRP1	TSS200	island	TSS200-island	chr19:46526046-46526334	NA	NA
cg04247717	-0.302485	0.528058	-19.3447	1.02714e-31	2.46446e-29	61.841	0.6793	0.376816	-0.302485	2	131797702	F	II	ARHGEF4	Body	island	Body-island	chr2:131797362-131798088	NA	NA
cg17991695	-0.3085	0.480102	-19.3425	1.03486e-31	2.48151e-29	61.8335	0.634352	0.325852	-0.3085	6	10882974	F	II	GCM2	TSS1500	island	TSS1500-island	chr6:10882926-10883149	NA	NA
cg25130381	-0.200336	0.703006	-19.3413	1.03888e-31	2.48965e-29	61.8297	0.803174	0.602838	-0.200336	1	27440721	F	I	SLC9A1	Body	opensea	Body-opensea		NA	NA
cg00792015	0.296317	0.479558	19.3406	1.04138e-31	2.49398e-29	61.8273	0.3314	0.627717	0.296317	2	218466469	R	II	DIRC3	Body	opensea	Body-opensea		NA	NA
cg18055067	-0.169203	0.8287	-19.3405	1.04192e-31	2.49398e-29	61.8268	0.913301	0.744098	-0.169203	5	148803404	R	II	LOC728264	Body	opensea	Body-opensea		NA	TRUE
cg12364136	0.31519	0.674719	19.3363	1.05689e-31	2.5268e-29	61.8125	0.517124	0.832314	0.31519	7	158331217	R	II	PTPRN2	Body	opensea	Body-opensea		NA	NA
cg17343374	-0.206227	0.778766	-19.3296	1.08091e-31	2.57809e-29	61.7902	0.88188	0.675653	-0.206227	4	901981	R	II	GAK	Body	shore	Body-shore	chr4:899774-899985	NA	TRUE
cg21907107	-0.338591	0.510577	-19.3267	1.09169e-31	2.59979e-29	61.7803	0.679873	0.341282	-0.338591	5	76932062	F	II	OTP	Body	shore	Body-shore	chr5:76932317-76933523	NA	NA
cg01287975	-0.486616	0.451071	-19.326	1.09431e-31	2.60235e-29	61.7779	0.694379	0.207763	-0.486616	7	97361241	R	II	TAC1	TSS200	island	TSS200-island	chr7:97361132-97363018	NA	NA
cg04939326	-0.182992	0.837355	-19.3244	1.10016e-31	2.6147e-29	61.7726	0.928851	0.745859	-0.182992	11	73278053	F	II	FAM168A	5'UTR	opensea	5'UTR-opensea		NA	TRUE		rs74541507
cg02739870	0.386335	0.512531	19.3239	1.10208e-31	2.61773e-29	61.7708	0.319363	0.705699	0.386335	5	1113320	F	II	SLC12A7	TSS1500	shore	TSS1500-shore	chr5:1111396-1112388	NA	NA		rs73731172
cg15812753	-0.257866	0.425924	-19.3206	1.11462e-31	2.64595e-29	61.7595	0.554857	0.296991	-0.257866	2	177029813	F	I	HOXD3	5'UTR	island	5'UTR-island	chr2:177029413-177029941	NA	NA
cg16276063	-0.467405	0.51287	-19.3176	1.12566e-31	2.67057e-29	61.7497	0.746573	0.279168	-0.467405	3	181421703	F	I	SOX2OT	Body	opensea	Body-opensea		NA	TRUE
cg20146541	-0.45993	0.276971	-19.314	1.13975e-31	2.70082e-29	61.7373	0.506935	0.0470057	-0.45993	1	248020697	R	I	TRIM58	1stExon	island	1stExon-island	chr1:248020330-248021252	NA	NA	high-CpG:246087104-246087425
cg23242052	-0.471065	0.322898	-19.3137	1.1408e-31	2.70172e-29	61.7364	0.55843	0.0873651	-0.471065	2	176947786	R	II	EVX2	Body	island	Body-island	chr2:176944087-176948446	NA	NA
cg09076431	-0.39133	0.338342	-19.3128	1.14446e-31	2.70879e-29	61.7332	0.534007	0.142677	-0.39133	1	197889163	F	II	LHX9	Body	shore	Body-shore	chr1:197890478-197890824	NA	NA
cg23621013	0.358172	0.522738	19.3108	1.15207e-31	2.72521e-29	61.7266	0.343652	0.701824	0.358172	7	135433353	F	II	FAM180A	1stExon	opensea	1stExon-opensea		NA	TRUE
cg08171483	-0.211777	0.836287	-19.3068	1.16764e-31	2.75879e-29	61.7132	0.942175	0.730398	-0.211777	3	38010391	R	II	CTDSPL	Body	opensea	Body-opensea		NA	NA
cg25895948	-0.47911	0.377682	-19.3045	1.17688e-31	2.77736e-29	61.7054	0.617236	0.138127	-0.47911	15	85360655	R	I	ALPK3	1stExon	shore	1stExon-shore	chr15:85360192-85360574	TRUE	NA	high-CpG:83161576-83161714
cg08435780	0.246879	0.500696	19.3022	1.18599e-31	2.79722e-29	61.6977	0.377256	0.624135	0.246879	16	49749891	F	I	ZNF423	Body	opensea	Body-opensea		NA	TRUE		rs8054396
cg24593464	0.383881	0.630448	19.3011	1.19035e-31	2.80586e-29	61.694	0.438507	0.822389	0.383881	11	120008998	R	II	TRIM29	TSS200	shore	TSS200-shore	chr11:120008046-120008710	TRUE	NA
cg12279138	0.332702	0.279483	19.2896	1.23783e-31	2.91437e-29	61.6551	0.113132	0.445834	0.332702	1	224370322	F	II	DEGS1	TSS1500	shore	TSS1500-shore	chr1:224370585-224371755	NA	NA
cg13553455	0.429618	0.615083	19.2841	1.26128e-31	2.9661e-29	61.6364	0.400274	0.829892	0.429618	10	105846002	R	II	COL17A1	TSS1500	opensea	TSS1500-opensea		NA	NA
cg11718162	-0.429245	0.642939	-19.2816	1.27195e-31	2.98771e-29	61.628	0.857561	0.428316	-0.429245	1	154128002	F	II	TPM3	3'UTR	opensea	3'UTR-opensea		NA	TRUE
cg03730533	-0.444042	0.360373	-19.28	1.2788e-31	3.00204e-29	61.6226	0.582394	0.138352	-0.444042	7	26897685	F	I	SKAP2	Body	opensea	Body-opensea		NA	TRUE
cg18886436	0.163945	0.125869	19.2747	1.3019e-31	3.0527e-29	61.6048	0.0438961	0.207841	0.163945	12	54785171	R	I	ZNF385A	TSS200	island	TSS200-island	chr12:54784900-54785238	TRUE	NA
cg22596016	-0.331911	0.61752	-19.2745	1.30297e-31	3.05344e-29	61.6039	0.783475	0.451564	-0.331911	17	61711557	R	II	MAP3K3	Body	opensea	Body-opensea		NA	TRUE
cg07119829	-0.424219	0.43652	-19.2716	1.31555e-31	3.07933e-29	61.5944	0.64863	0.224411	-0.424219	2	223168487	F	II	CCDC140	5'UTR	shore	5'UTR-shore	chr2:223168653-223169008	NA	NA
cg05891899	-0.20851	0.810287	-19.2649	1.34584e-31	3.14474e-29	61.5717	0.914542	0.706032	-0.20851	11	1326879	R	II	TOLLIP	Body	shelf	Body-shelf	chr11:1330390-1331498	NA	NA
cg23365739	-0.31258	0.590885	-19.2639	1.35065e-31	3.15416e-29	61.5681	0.747174	0.434595	-0.31258	14	57277178	F	II	OTX2	1stExon	shore	1stExon-shore	chr14:57278068-57278287	NA	NA
cg23654401	0.532818	0.424413	19.2611	1.36342e-31	3.18213e-29	61.5587	0.158004	0.690822	0.532818	7	55606442	F	II	VOPP1	Body	opensea	Body-opensea		TRUE	TRUE
cg15709065	-0.335495	0.699487	-19.2598	1.36947e-31	3.19438e-29	61.5543	0.867235	0.53174	-0.335495	3	134090737	F	II	AMOTL2	5'UTR	shore	5'UTR-shore	chr3:134092257-134093741	NA	NA
cg01044293	-0.448725	0.56273	-19.2596	1.37026e-31	3.19438e-29	61.5538	0.787092	0.338367	-0.448725	2	173296469	F	II	ITGA6	Body	shelf	Body-shelf	chr2:173292099-173293183	NA	NA
cg22802461	0.384723	0.693943	19.2517	1.40769e-31	3.27785e-29	61.5269	0.501581	0.886305	0.384723	19	35981531	F	II	KRTDAP	TSS200	opensea	TSS200-opensea		NA	NA		rs73043062
cg08425229	0.336817	0.578667	19.2481	1.425e-31	3.31622e-29	61.5147	0.410259	0.747076	0.336817	1	3470175	F	II	MEGF6	Body	opensea	Body-opensea		TRUE	TRUE		rs12074184
cg18297736	-0.421423	0.326985	-19.2434	1.44799e-31	3.3639e-29	61.4988	0.537697	0.116274	-0.421423	4	85416865	F	II	NKX6-1	Body	shore	Body-shore	chr4:85417659-85420799	NA	NA
cg03156170	-0.22984	0.778672	-19.2407	1.46105e-31	3.39227e-29	61.4898	0.893591	0.663752	-0.22984	17	55673870	F	I	MSI2	Body	opensea	Body-opensea		NA	TRUE		rs76713176
cg08875705	-0.398029	0.484097	-19.2349	1.49025e-31	3.4521e-29	61.4701	0.683111	0.285082	-0.398029	12	6665330	R	I	IFFO1	TSS200	island	TSS200-island	chr12:6664425-6665336	NA	NA		rs11064253
cg00316508	-0.194337	0.841796	-19.2304	1.51336e-31	3.50363e-29	61.4548	0.938965	0.744628	-0.194337	4	146828698	F	II	ZNF827	Body	opensea	Body-opensea		NA	TRUE
cg00448814	-0.168079	0.833574	-19.2274	1.52887e-31	3.5375e-29	61.4446	0.917613	0.749535	-0.168079	6	28227482	R	II	NKAPL	1stExon	island	1stExon-island	chr6:28226979-28227483	NA	NA			rs77742720
cg19544065	0.346917	0.650639	19.222	1.55675e-31	3.59993e-29	61.4266	0.47718	0.824097	0.346917	2	2178847	F	II	MYT1L	5'UTR	opensea	5'UTR-opensea		NA	TRUE
cg27122213	-0.398689	0.282948	-19.2174	1.58142e-31	3.64858e-29	61.4109	0.482292	0.0836037	-0.398689	14	57274763	F	I	OTX2	5'UTR	island	5'UTR-island	chr14:57274607-57276840	NA	NA		rs12878110
cg19962750	-0.405361	0.647513	-19.2149	1.59504e-31	3.67791e-29	61.4024	0.850194	0.444833	-0.405361	7	96655444	R	II	DLX5	TSS1500	shore	TSS1500-shore	chr7:96653467-96654199	NA	TRUE
cg09623018	0.358268	0.5337	19.2114	1.61424e-31	3.72004e-29	61.3904	0.354565	0.712834	0.358268	10	25507161	R	II	GPR158	Body	opensea	Body-opensea		NA	NA
cg10416668	0.380827	0.632547	19.2111	1.61588e-31	3.72169e-29	61.3894	0.442134	0.822961	0.380827	16	27437730	F	II	IL21R	TSS1500	opensea	TSS1500-opensea		TRUE	NA		rs74968150
cg23929284	0.170999	0.117304	19.2076	1.63516e-31	3.7618e-29	61.3776	0.0318043	0.202803	0.170999	20	30605916	F	I	C20orf160	Body	island	Body-island	chr20:30605744-30605970	TRUE	NA
cg06051311	0.50765	0.508937	19.2063	1.64237e-31	3.77623e-29	61.3732	0.255112	0.762761	0.50765	6	30131001	F	II	TRIM15	5'UTR	opensea	5'UTR-opensea		NA	TRUE
cg24995678	0.47234	0.554315	19.2038	1.65651e-31	3.80657e-29	61.3647	0.318145	0.790485	0.47234	2	235936394	R	I	SH3BP4	5'UTR	opensea	5'UTR-opensea		TRUE	NA
cg04395788	-0.23118	0.772123	-19.2008	1.67312e-31	3.84252e-29	61.3547	0.887713	0.656533	-0.23118	8	119081939	R	II	EXT1	Body	opensea	Body-opensea		NA	TRUE
cg13316854	-0.315411	0.32322	-19.1931	1.71795e-31	3.93749e-29	61.3284	0.480926	0.165515	-0.315411	2	177027856	F	I	HOXD3	TSS1500	island	TSS1500-island	chr2:177027617-177028014	NA	NA
cg00197058	-0.315971	0.645085	-19.1839	1.7721e-31	4.05534e-29	61.2974	0.803071	0.4871	-0.315971	17	59554672	R	II	TBX4	Body	opensea	Body-opensea		NA	NA
cg14013695	-0.40839	0.499107	-19.1838	1.77284e-31	4.05534e-29	61.297	0.703302	0.294911	-0.40839	7	27184176	R	I	HOXA5	TSS1500	island	TSS1500-island	chr7:27182613-27185562	NA	NA
cg01861913	-0.4317	0.453978	-19.1788	1.80309e-31	4.11986e-29	61.2802	0.669828	0.238128	-0.4317	3	61550569	F	II	PTPRG	Body	island	Body-island	chr3:61550346-61550577	TRUE	NA
cg09177577	-0.156607	0.791914	-19.1732	1.83813e-31	4.19753e-29	61.261	0.870218	0.713611	-0.156607	8	22503577	F	I	BIN3	Body	opensea	Body-opensea		NA	TRUE		rs35083320
cg02331025	-0.171197	0.807401	-19.1707	1.85375e-31	4.23082e-29	61.2525	0.893	0.721803	-0.171197	5	37835965	R	II	GDNF	TSS1500	shore	TSS1500-shore	chr5:37836747-37840726	NA	TRUE
cg17556527	-0.215244	0.829154	-19.1655	1.88683e-31	4.30142e-29	61.2349	0.936776	0.721532	-0.215244	11	67859023	R	II	CHKA	Body	opensea	Body-opensea		NA	TRUE
cg19494591	-0.279103	0.745091	-19.1637	1.89849e-31	4.32557e-29	61.2288	0.884642	0.605539	-0.279103	7	140174476	R	II	MKRN1	Body	shelf	Body-shelf	chr7:140178289-140179467	NA	NA
cg15711404	-0.178638	0.847965	-19.1624	1.9068e-31	4.34204e-29	61.2244	0.937284	0.758647	-0.178638	17	80803949	F	II	TBCD	Body	opensea	Body-opensea		NA	NA			rs77339079
cg11954355	0.335183	0.428037	19.1613	1.9138e-31	4.35552e-29	61.2208	0.260445	0.595628	0.335183	20	57393844	F	II	MIR298	TSS1500	opensea	TSS1500-opensea		TRUE	TRUE		rs6100239
cg15007228	-0.21243	0.622212	-19.1583	1.93385e-31	4.39618e-29	61.2104	0.728427	0.515997	-0.21243	1	2210335	F	I	SKI	Body	shore	Body-shore	chr1:2212020-2213881	TRUE	TRUE
cg17380661	-0.458289	0.31617	-19.1559	1.94922e-31	4.42612e-29	61.2025	0.545315	0.0870253	-0.458289	6	100912946	R	I	SIM1	TSS1500	island	TSS1500-island	chr6:100912071-100913337	TRUE	NA			rs3756916
cg08494390	-0.323882	0.652146	-19.1531	1.96795e-31	4.46612e-29	61.193	0.814088	0.490205	-0.323882	4	87980297	R	II	AFF1	Body	opensea	Body-opensea		NA	TRUE			rs80343446
cg25416125	-0.233856	0.672077	-19.1502	1.98732e-31	4.50754e-29	61.1832	0.789005	0.555149	-0.233856	12	56329615	R	II	DGKA	5'UTR	island	5'UTR-island	chr12:56329518-56329790	NA	NA
cg09341491	-0.219512	0.80384	-19.15	1.9893e-31	4.50948e-29	61.1822	0.913596	0.694084	-0.219512	16	50707795	F	II	SNX20	Body	island	Body-island	chr16:50707291-50708041	NA	NA
cg10038618	-0.361963	0.516293	-19.139	2.06505e-31	4.67066e-29	61.145	0.697274	0.335311	-0.361963	1	3567719	F	II	TP73	TSS1500	island	TSS1500-island	chr1:3566445-3569636	NA	NA
cg00305585	-0.189991	0.769795	-19.137	2.07873e-31	4.69898e-29	61.1384	0.86479	0.674799	-0.189991	16	1610898	F	II	IFT140	Body	opensea	Body-opensea		NA	NA
cg15633390	0.340434	0.271149	19.1328	2.10886e-31	4.76439e-29	61.124	0.100932	0.441366	0.340434	4	99851211	R	II	EIF4E	5'UTR	shore	5'UTR-shore	chr4:99849305-99850552	NA	NA
cg15679064	-0.347352	0.53122	-19.1286	2.13974e-31	4.82874e-29	61.1095	0.704896	0.357545	-0.347352	19	49134105	R	II	DBP	Body	island	Body-island	chr19:49132603-49134291	NA	NA
cg16592658	0.38073	0.562478	19.1269	2.15196e-31	4.84817e-29	61.1039	0.372113	0.752843	0.38073	19	4229887	R	II	EBI3	Body	opensea	Body-opensea		NA	NA
cg13641903	-0.255644	0.45614	-19.1264	2.15529e-31	4.85295e-29	61.1023	0.583962	0.328318	-0.255644	11	32452608	F	I	WT1	Body	island	Body-island	chr11:32452144-32452708	NA	NA
cg06383241	0.493445	0.4404	19.1229	2.18125e-31	4.90591e-29	61.0904	0.193677	0.687122	0.493445	12	116997022	R	II	MAP1LC3B2	TSS200	opensea	TSS200-opensea		NA	TRUE			rs77874304
cg21907579	-0.508139	0.398446	-19.1064	2.30746e-31	5.18398e-29	61.0343	0.652516	0.144377	-0.508139	12	114845868	F	II	TBX5	1stExon	island	1stExon-island	chr12:114845861-114847650	NA	TRUE		rs78462880
cg06538684	0.376455	0.440907	19.1028	2.33586e-31	5.239e-29	61.0221	0.252679	0.629135	0.376455	12	12511223	F	II	LOH12CR2	TSS1500	shore	TSS1500-shore	chr12:12509911-12510428	NA	NA
cg01793445	0.400452	0.502887	19.0939	2.40784e-31	5.39743e-29	60.9919	0.302661	0.703113	0.400452	1	167632415	R	II	RCSD1	Body	opensea	Body-opensea		NA	TRUE
cg16001384	0.425134	0.662622	19.093	2.41534e-31	5.40823e-29	60.9888	0.450054	0.875189	0.425134	8	134306801	R	II	NDRG1	5'UTR	shore	5'UTR-shore	chr8:134308328-134310145	TRUE	TRUE
cg22275864	-0.405948	0.393744	-19.0878	2.4586e-31	5.50202e-29	60.9711	0.596718	0.19077	-0.405948	8	37822562	R	I	ADRB3	Body	island	Body-island	chr8:37822486-37824008	NA	NA
cg00929376	-0.365757	0.643799	-19.0811	2.5153e-31	5.61643e-29	60.9483	0.826678	0.460921	-0.365757	1	25258236	F	II	RUNX3	TSS1500	island	TSS1500-island	chr1:25255527-25259005	NA	NA		rs3116868
cg03028506	-0.25465	0.780107	-19.0797	2.52776e-31	5.63395e-29	60.9434	0.907432	0.652782	-0.25465	15	38577420	F	II	SPRED1	Body	opensea	Body-opensea		NA	TRUE
cg18744668	-0.118002	0.880656	-19.0797	2.52795e-31	5.63395e-29	60.9433	0.939657	0.821655	-0.118002	8	99962347	R	II	OSR2	Body	shore	Body-shore	chr8:99960497-99961438	NA	TRUE
cg08962185	0.223326	0.233951	19.0796	2.52875e-31	5.63395e-29	60.943	0.122288	0.345614	0.223326	8	143336052	F	II	TSNARE1	Body	shelf	Body-shelf	chr8:143333047-143333519	NA	NA
cg13352750	-0.399133	0.287221	-19.0767	2.55416e-31	5.6874e-29	60.9331	0.486787	0.0876545	-0.399133	7	27225123	R	I	HOXA11AS	Body	island	Body-island	chr7:27225050-27225629	NA	NA			rs71757806
cg14035521	0.201957	0.198076	19.0736	2.58125e-31	5.74138e-29	60.9225	0.097098	0.299055	0.201957	9	37486469	R	II	POLR1E	Body	shore	Body-shore	chr9:37485801-37486099	NA	NA
cg19216792	-0.4037	0.476589	-19.0719	2.59631e-31	5.77169e-29	60.9167	0.678439	0.274739	-0.4037	7	26897202	F	II	SKAP2	Body	opensea	Body-opensea		NA	NA
cg20967139	0.199922	0.164351	19.071	2.60406e-31	5.78571e-29	60.9138	0.0643895	0.264312	0.199922	12	54785055	R	I	ZNF385A	5'UTR	island	5'UTR-island	chr12:54784900-54785238	TRUE	NA	high-CpG:53071285-53071425
cg00007076	0.357202	0.376517	19.0686	2.62521e-31	5.82306e-29	60.9057	0.197916	0.555118	0.357202	8	67342600	F	II	RRS1	1stExon	shore	1stExon-shore	chr8:67344497-67344989	NA	NA
cg10378667	0.207009	0.271061	19.0646	2.66187e-31	5.89788e-29	60.8919	0.167557	0.374566	0.207009	12	122326303	F	II	PSMD9	TSS1500	shore	TSS1500-shore	chr12:122326482-122327044	NA	NA
cg01610632	-0.466728	0.492195	-19.0599	2.70438e-31	5.98876e-29	60.8761	0.725559	0.258831	-0.466728	3	147127579	R	II	ZIC1	1stExon	island	1stExon-island	chr3:147126988-147128999	NA	NA
cg08783253	-0.236223	0.740069	-19.0582	2.72016e-31	6.02039e-29	60.8703	0.85818	0.621958	-0.236223	17	40996565	F	II	AOC2	TSS200	opensea	TSS200-opensea		NA	NA
cg15634980	-0.38082	0.267009	-19.0547	2.75258e-31	6.08546e-29	60.8585	0.457418	0.0765987	-0.38082	6	36253026	F	I	PNPLA1	5'UTR	opensea	5'UTR-opensea		NA	NA		rs1467911
cg16336556	0.433768	0.553256	19.0532	2.76696e-31	6.11193e-29	60.8533	0.336372	0.77014	0.433768	2	33295138	R	II	LTBP1	Body	opensea	Body-opensea		TRUE	TRUE
cg08357990	0.260619	0.263348	19.0532	2.76759e-31	6.11193e-29	60.8531	0.133038	0.393657	0.260619	2	33359550	R	II	LTBP1	TSS200	opensea	TSS200-opensea		TRUE	TRUE
cg03915012	-0.162835	0.874975	-19.0503	2.79436e-31	6.16089e-29	60.8435	0.956392	0.793557	-0.162835	4	902074	F	II	GAK	Body	shelf	Body-shelf	chr4:898030-898532	NA	TRUE
cg24748769	-0.39133	0.293541	-19.0441	2.85466e-31	6.29041e-29	60.8222	0.489206	0.0978755	-0.39133	14	57271015	R	I	OTX2	Body	shelf	Body-shelf	chr14:57274607-57276840	NA	NA
cg08942939	-0.450804	0.367622	-19.0417	2.8776e-31	6.33103e-29	60.8142	0.593024	0.14222	-0.450804	1	119532542	F	II	TBX15	TSS1500	shore	TSS1500-shore	chr1:119529819-119530712	NA	NA
cg02713832	0.435744	0.528845	19.0354	2.94086e-31	6.45911e-29	60.7925	0.310973	0.746716	0.435744	11	60772559	F	II	CD6	Body	shelf	Body-shelf	chr11:60775036-60776307	NA	NA
cg06772221	0.36912	0.600305	19.0342	2.95257e-31	6.4813e-29	60.7886	0.415746	0.784865	0.36912	8	134062192	R	II	SLA	Body	opensea	Body-opensea		TRUE	TRUE
cg24838349	0.337996	0.574944	19.0306	2.98926e-31	6.55826e-29	60.7763	0.405946	0.743942	0.337996	19	55314972	R	II	KIR2DL4	TSS200	opensea	TSS200-opensea		NA	NA
cg02778609	0.395557	0.437087	19.0283	3.0133e-31	6.60379e-29	60.7683	0.239308	0.634865	0.395557	16	23568302	F	II	UBFD1	TSS1500	shore	TSS1500-shore	chr16:23568398-23569488	NA	NA
cg25450266	-0.450686	0.257813	-19.0239	3.05889e-31	6.70007e-29	60.7533	0.483156	0.0324696	-0.450686	19	35494294	R	II	GRAMD1A	Body	shelf	Body-shelf	chr19:35491151-35492020	TRUE	NA
cg16325502	-0.415605	0.380798	-19.0233	3.06502e-31	6.70984e-29	60.7513	0.5886	0.172995	-0.415605	2	223166435	F	II	CCDC140	5'UTR	shore	5'UTR-shore	chr2:223167205-223167560	NA	NA
cg12865837	-0.33103	0.609314	-19.0229	3.06934e-31	6.7143e-29	60.7499	0.774829	0.443799	-0.33103	6	100911526	F	II	SIM1	1stExon	shore	1stExon-shore	chr6:100912071-100913337	NA	TRUE
cg26023912	-0.342115	0.594566	-19.0199	3.10069e-31	6.77687e-29	60.7398	0.765623	0.423509	-0.342115	7	27184369	F	II	HOXA5	TSS1500	island	TSS1500-island	chr7:27182613-27185562	NA	NA
cg24575275	-0.377801	0.455659	-19.0192	3.10833e-31	6.7862e-29	60.7373	0.64456	0.266758	-0.377801	7	1094737	F	II	C7orf50	Body	shelf	Body-shelf	chr7:1097405-1097953	TRUE	NA
cg17848546	0.400925	0.52157	19.0129	3.17557e-31	6.92172e-29	60.716	0.321107	0.722032	0.400925	1	209605304	F	II	LOC642587	Body	opensea	Body-opensea		NA	NA
cg01800253	-0.331344	0.616889	-19.0098	3.2097e-31	6.98855e-29	60.7053	0.782561	0.451218	-0.331344	22	22290866	R	II	PPM1F	Body	shore	Body-shore	chr22:22292528-22292875	NA	NA
cg05437823	-0.383762	0.276623	-19.0076	3.23432e-31	7.03835e-29	60.6977	0.468504	0.0847419	-0.383762	6	50813676	R	I	TFAP2B	3'UTR	island	3'UTR-island	chr6:50813314-50813699	NA	NA
cg16235582	-0.451668	0.47525	-19.0066	3.24484e-31	7.05743e-29	60.6945	0.701084	0.249416	-0.451668	11	78673212	F	II	ODZ4	Body	island	Body-island	chr11:78673007-78673213	TRUE	TRUE
cg10062919	-0.316365	0.454749	-19.0048	3.26487e-31	7.09715e-29	60.6883	0.612932	0.296567	-0.316365	17	38503802	F	II	RARA	Body	shore	Body-shore	chr17:38501396-38501839	NA	TRUE
cg10617784	-0.48244	0.464877	-18.9988	3.33238e-31	7.23608e-29	60.6679	0.706097	0.223657	-0.48244	2	71134586	R	II	VAX2	Body	island	Body-island	chr2:71134585-71134792	NA	TRUE			rs35121961
cg03634729	0.287782	0.604569	18.9967	3.35698e-31	7.28165e-29	60.6606	0.460679	0.74846	0.287782	18	21452829	F	II	LAMA3	TSS200	opensea	TSS200-opensea		NA	NA
cg23860325	0.390353	0.53096	18.9965	3.35898e-31	7.28205e-29	60.66	0.335784	0.726136	0.390353	7	54271152	R	II	HPVC1	TSS1500	opensea	TSS1500-opensea		NA	NA
cg12806121	-0.213642	0.780146	-18.9947	3.37961e-31	7.32283e-29	60.6539	0.886967	0.673325	-0.213642	1	10601389	F	II	PEX14	Body	opensea	Body-opensea		NA	TRUE
cg22200736	-0.358421	0.535623	-18.9905	3.42923e-31	7.42636e-29	60.6394	0.714833	0.356413	-0.358421	12	52995358	R	II	KRT72	TSS200	shore	TSS200-shore	chr12:52994772-52995312	NA	NA
cg10048215	-0.165906	0.852796	-18.9889	3.44746e-31	7.46181e-29	60.6341	0.935749	0.769843	-0.165906	12	12938383	F	II	APOLD1	Body	shore	Body-shore	chr12:12939713-12940391	NA	NA
cg11855615	-0.35268	0.586476	-18.9885	3.45249e-31	7.46869e-29	60.6326	0.762816	0.410136	-0.35268	17	33817136	F	I	SLFN12L	Body	shelf	Body-shelf	chr17:33814234-33814947	NA	NA
cg09968620	-0.511172	0.310246	-18.9816	3.53468e-31	7.63827e-29	60.6092	0.565832	0.0546598	-0.511172	2	176987383	R	II	HOXD9	TSS200	island	TSS200-island	chr2:176986424-176988291	TRUE	TRUE
cg16565394	-0.375027	0.460847	-18.9761	3.60238e-31	7.77987e-29	60.5903	0.648361	0.273334	-0.375027	6	100896674	R	II	SIM1	Body	shore	Body-shore	chr6:100897080-100897621	NA	NA
cg06679878	0.397061	0.652192	18.9758	3.60601e-31	7.77987e-29	60.5893	0.453662	0.850723	0.397061	12	130335340	R	II	TMEM132D	Body	opensea	Body-opensea		NA	NA
cg05114861	-0.332721	0.716819	-18.9752	3.61317e-31	7.79115e-29	60.5873	0.883179	0.550458	-0.332721	3	15366034	F	II	SH3BP5	Body	opensea	Body-opensea		NA	TRUE		rs9875649
cg25830182	-0.478132	0.329373	-18.9706	3.67031e-31	7.91012e-29	60.5717	0.568439	0.0903075	-0.478132	4	85417077	F	II	NKX6-1	Body	shore	Body-shore	chr4:85417659-85420799	NA	NA
cg19987768	-0.600898	0.378045	-18.9701	3.6771e-31	7.92052e-29	60.5698	0.678494	0.0775959	-0.600898	17	750306	R	II	NXN	Body	opensea	Body-opensea		NA	NA
cg04539111	-0.228186	0.762205	-18.966	3.72923e-31	8.02421e-29	60.5558	0.876298	0.648113	-0.228186	16	67997858	R	II	SLC12A4	Body	opensea	Body-opensea		NA	NA
cg04623270	-0.216968	0.7531	-18.9638	3.75685e-31	8.07931e-29	60.5484	0.861584	0.644616	-0.216968	16	58150017	F	II	C16orf80	Body	opensea	Body-opensea		NA	TRUE
cg16925459	0.365722	0.409489	18.963	3.76733e-31	8.09753e-29	60.5456	0.226628	0.59235	0.365722	7	18548581	R	II	HDAC9	Body	opensea	Body-opensea		NA	TRUE
cg06875131	-0.251569	0.638817	-18.9616	3.78636e-31	8.13408e-29	60.5406	0.764602	0.513032	-0.251569	17	63554468	F	II	AXIN2	Body	shore	Body-shore	chr17:63555902-63557362	NA	NA
cg00872170	0.306778	0.739169	18.96	3.8068e-31	8.16965e-29	60.5353	0.58578	0.892558	0.306778	7	157567443	F	II	PTPRN2	Body	shore	Body-shore	chr7:157568163-157568404	NA	NA		rs73521447
cg15961044	0.108581	0.116309	18.96	3.80698e-31	8.16965e-29	60.5352	0.0620186	0.1706	0.108581	18	59992280	R	II	TNFRSF11A	TSS1500	island	TSS1500-island	chr18:59992069-59993556	TRUE	NA
cg13411286	-0.268966	0.810837	-18.9598	3.80986e-31	8.17148e-29	60.5345	0.94532	0.676354	-0.268966	2	191365138	F	II	MFSD6	3'UTR	opensea	3'UTR-opensea		NA	TRUE
cg22494858	-0.345699	0.383185	-18.9562	3.85682e-31	8.26778e-29	60.5222	0.556034	0.210335	-0.345699	1	110611712	F	II	ALX3	Body	island	Body-island	chr1:110610265-110613303	NA	TRUE			rs79306185
cg02655630	-0.340245	0.52092	-18.9552	3.87024e-31	8.29215e-29	60.5188	0.691043	0.350798	-0.340245	20	44658941	R	II	SLC12A5	Body	island	Body-island	chr20:44657463-44659243	TRUE	NA
cg07231479	-0.242432	0.638457	-18.9549	3.87321e-31	8.29409e-29	60.518	0.759673	0.51724	-0.242432	5	140794359	R	II	PCDHGA4	Body	island	Body-island	chr5:140794358-140795045	NA	NA
cg07599819	0.439923	0.700005	18.949	3.95326e-31	8.461e-29	60.4976	0.480043	0.919966	0.439923	19	57308239	F	II	ZIM2	Body	shore	Body-shore	chr19:57306682-57307032	NA	NA
cg10610428	0.437008	0.531819	18.9476	3.97154e-31	8.49561e-29	60.493	0.313316	0.750323	0.437008	12	5884295	R	II	ANO2	Body	opensea	Body-opensea		NA	NA
cg01901466	0.359714	0.631075	18.9456	3.99864e-31	8.5445e-29	60.4862	0.451218	0.810932	0.359714	14	93388880	R	II	CHGA	TSS1500	shore	TSS1500-shore	chr14:93389245-93389899	NA	NA
cg10269365	-0.380179	0.37037	-18.9449	4.00843e-31	8.56087e-29	60.4838	0.56046	0.180281	-0.380179	2	223166989	F	I	CCDC140	5'UTR	shore	5'UTR-shore	chr2:223167205-223167560	NA	NA
cg02584377	-0.222903	0.819622	-18.9352	4.14415e-31	8.83198e-29	60.4506	0.931073	0.708171	-0.222903	12	122489545	F	II	BCL7A	Body	opensea	Body-opensea		NA	TRUE			rs75941249
cg25999578	-0.377724	0.514503	-18.9349	4.1486e-31	8.83677e-29	60.4495	0.703365	0.325641	-0.377724	7	27205514	F	II	HOXA9	TSS1500	island	TSS1500-island	chr7:27203915-27206462	TRUE	NA
cg08200419	0.292808	0.415137	18.9308	4.20708e-31	8.9566e-29	60.4356	0.268733	0.561542	0.292808	10	134261480	R	II	C10orf91	Body	opensea	Body-opensea		TRUE	NA
cg05860723	-0.351468	0.304116	-18.9289	4.23557e-31	9.0125e-29	60.4289	0.47985	0.128382	-0.351468	12	81102486	R	I	MYF6	Body	island	Body-island	chr12:81102034-81102716	NA	NA
cg21590264	-0.505931	0.361605	-18.9155	4.43424e-31	9.42028e-29	60.3832	0.614571	0.10864	-0.505931	5	37834850	F	II	GDNF	1stExon	island	1stExon-island	chr5:37834671-37835128	NA	NA
cg14349667	-0.383471	0.320513	-18.9131	4.47112e-31	9.48862e-29	60.3749	0.512248	0.128778	-0.383471	4	81189706	R	I	FGF5	Body	shore	Body-shore	chr4:81187494-81187913	NA	NA
cg02127965	0.330253	0.759666	18.911	4.50341e-31	9.55209e-29	60.3677	0.594539	0.924792	0.330253	19	45175197	F	II	CEACAM19	5'UTR	opensea	5'UTR-opensea		NA	NA
cg06833778	0.35827	0.498331	18.9077	4.55403e-31	9.65438e-29	60.3566	0.319196	0.677466	0.35827	1	241464644	R	II	RGS7	Body	opensea	Body-opensea		NA	TRUE
cg02627455	-0.329695	0.736937	-18.9045	4.60477e-31	9.75179e-29	60.3455	0.901785	0.57209	-0.329695	7	27157818	F	II	HOXA3	5'UTR	shelf	5'UTR-shelf	chr7:27154999-27155426	NA	NA
cg15381475	-0.279695	0.542772	-18.9045	4.60483e-31	9.75179e-29	60.3455	0.682619	0.402925	-0.279695	7	6436101	F	I	RAC1	Body	opensea	Body-opensea		NA	NA
cg05771518	-0.465397	0.295479	-18.898	4.70974e-31	9.94257e-29	60.3231	0.528177	0.0627804	-0.465397	12	54339288	R	II	HOXC13	3'UTR	shore	3'UTR-shore	chr12:54338761-54339168	NA	NA
cg00547530	0.332998	0.443868	18.8964	4.73566e-31	9.99204e-29	60.3176	0.277369	0.610367	0.332998	16	3559687	F	II	CLUAP1	Body	opensea	Body-opensea		NA	NA
cg13151135	0.129637	0.118438	18.8955	4.75034e-31	1.00127e-28	60.3145	0.0536199	0.183256	0.129637	1	26560306	R	II	CCDC21	TSS1500	shore	TSS1500-shore	chr1:26560449-26561028	NA	NA
cg17737681	-0.348736	0.345087	-18.8938	4.77721e-31	1.00586e-28	60.3089	0.519455	0.170719	-0.348736	2	172952136	R	I	DLX1	Body	island	Body-island	chr2:172951289-172952159	NA	TRUE
cg18773937	0.385154	0.376719	18.8925	4.7989e-31	1.0099e-28	60.3044	0.184142	0.569296	0.385154	2	113594611	R	II	IL1B	TSS1500	opensea	TSS1500-opensea		NA	NA
cg08305799	0.305193	0.233895	18.8905	4.8323e-31	1.0164e-28	60.2975	0.081298	0.386491	0.305193	8	30580804	F	II	GSR	Body	shelf	Body-shelf	chr8:30584790-30585651	NA	NA
cg10253847	-0.346164	0.263407	-18.8901	4.83919e-31	1.01731e-28	60.296	0.436489	0.090325	-0.346164	6	28227085	R	I	NKAPL	TSS200	island	TSS200-island	chr6:28226979-28227483	NA	NA	high-CpG:28335047-28335084
cg05999993	0.305277	0.260141	18.8887	4.86128e-31	1.02142e-28	60.2915	0.107503	0.41278	0.305277	7	36764205	R	II	AOAH	TSS200	opensea	TSS200-opensea		NA	NA			rs74451644
cg07906724	0.446041	0.493816	18.8843	4.93548e-31	1.03593e-28	60.2764	0.270796	0.716837	0.446041	8	42623946	R	II	CHRNA6	TSS1500	opensea	TSS1500-opensea		NA	NA
cg09840386	-0.161965	0.858139	-18.8831	4.95573e-31	1.0391e-28	60.2723	0.939121	0.777156	-0.161965	17	79058751	F	II	BAIAP2	Body	opensea	Body-opensea		NA	NA
cg22876908	0.221084	0.341121	18.877	5.06057e-31	1.05998e-28	60.2514	0.230579	0.451663	0.221084	12	56325149	F	II	DGKA	TSS1500	shore	TSS1500-shore	chr12:56325774-56326223	TRUE	NA
cg08697503	-0.415375	0.329117	-18.8766	5.06746e-31	1.06087e-28	60.2501	0.536805	0.12143	-0.415375	2	223166946	R	II	CCDC140	5'UTR	shore	5'UTR-shore	chr2:223167205-223167560	NA	NA
cg16571836	-0.197407	0.830552	-18.8746	5.10284e-31	1.06716e-28	60.2431	0.929256	0.731849	-0.197407	15	90579809	F	II	ZNF710	5'UTR	opensea	5'UTR-opensea		NA	TRUE
cg09935667	-0.306123	0.771374	-18.8716	5.15663e-31	1.07785e-28	60.2327	0.924435	0.618312	-0.306123	12	117164627	R	II	C12orf49	Body	opensea	Body-opensea		NA	TRUE
cg07803375	-0.323067	0.660144	-18.8647	5.27916e-31	1.10175e-28	60.2093	0.821678	0.498611	-0.323067	7	811206	F	I	HEATR2	Body	shelf	Body-shelf	chr7:813627-814392	NA	TRUE
cg05035315	0.363199	0.619605	18.8629	5.31237e-31	1.10696e-28	60.203	0.438006	0.801205	0.363199	11	132691484	F	II	OPCML	Body	opensea	Body-opensea		NA	TRUE
cg17019053	-0.321471	0.499806	-18.8619	5.33165e-31	1.1104e-28	60.1994	0.660542	0.33907	-0.321471	2	74875263	F	I	C2orf65	TSS200	island	TSS200-island	chr2:74875128-74875562	NA	NA
cg17843665	-0.354186	0.659275	-18.8608	5.35165e-31	1.11399e-28	60.1957	0.836369	0.482182	-0.354186	13	24351673	F	II	MIPEP	Body	opensea	Body-opensea		NA	TRUE
cg07109804	0.226464	0.224367	18.8602	5.36265e-31	1.11555e-28	60.1936	0.111134	0.337599	0.226464	15	83654517	F	II	FAM103A1	TSS1500	shore	TSS1500-shore	chr15:83654590-83655245	NA	NA
cg06651376	-0.177081	0.852404	-18.8601	5.3647e-31	1.11555e-28	60.1932	0.940944	0.763864	-0.177081	17	1690794	R	I	SMYD4	Body	opensea	Body-opensea		TRUE	TRUE
cg27622679	-0.286984	0.649558	-18.8596	5.3735e-31	1.1168e-28	60.1916	0.79305	0.506066	-0.286984	3	181441978	R	II	SOX2OT	Body	shelf	Body-shelf	chr3:181444409-181445000	NA	NA
cg15496388	-0.348123	0.528681	-18.8567	5.42655e-31	1.12667e-28	60.1818	0.702742	0.354619	-0.348123	1	155937541	F	II	ARHGEF2	Body	opensea	Body-opensea		NA	TRUE
cg10205928	-0.380454	0.475352	-18.8544	5.47102e-31	1.13495e-28	60.1737	0.665578	0.285125	-0.380454	7	96642794	R	II	DLX6AS	Body	shelf	Body-shelf	chr7:96645786-96646599	NA	NA
cg21341586	0.331279	0.232958	18.8543	5.47211e-31	1.13495e-28	60.1735	0.0673182	0.398597	0.331279	4	99851281	R	II	EIF4E	5'UTR	shore	5'UTR-shore	chr4:99849305-99850552	NA	NA
cg20690420	-0.315327	0.508575	-18.8489	5.57522e-31	1.15455e-28	60.1549	0.666239	0.350911	-0.315327	6	108488751	F	II	NR2E1	Body	island	Body-island	chr6:108485671-108490539	NA	NA
cg04086239	0.370005	0.699757	18.8448	5.65487e-31	1.16933e-28	60.1407	0.514754	0.884759	0.370005	16	24067174	R	II	PRKCB	Body	opensea	Body-opensea		NA	TRUE
cg24809269	0.461289	0.535489	18.8447	5.65641e-31	1.16933e-28	60.1405	0.304844	0.766133	0.461289	17	74260692	F	II	FAM100B	TSS1500	shore	TSS1500-shore	chr17:74261127-74262282	NA	NA
cg22387369	-0.437328	0.309141	-18.8446	5.65818e-31	1.16933e-28	60.1401	0.527805	0.0904774	-0.437328	15	85360691	R	I	ALPK3	1stExon	shore	1stExon-shore	chr15:85360192-85360574	TRUE	NA	high-CpG:83161576-83161714
cg03221073	0.420545	0.681819	18.844	5.66922e-31	1.171e-28	60.1382	0.471547	0.892092	0.420545	1	186157555	R	II	HMCN1	Body	opensea	Body-opensea		NA	TRUE
cg08928145	-0.201218	0.69157	-18.8419	5.71053e-31	1.17893e-28	60.131	0.792179	0.590961	-0.201218	19	19625364	F	II	TSSK6	3'UTR	island	3'UTR-island	chr19:19624954-19627258	NA	NA
cg11311053	-0.194482	0.777173	-18.8405	5.7374e-31	1.18327e-28	60.1263	0.874414	0.679932	-0.194482	12	124912049	F	II	NCOR2	Body	shore	Body-shore	chr12:124911243-124911464	TRUE	NA
cg12144100	0.290819	0.409821	18.832	5.90819e-31	1.21662e-28	60.097	0.264412	0.55523	0.290819	7	157890277	R	II	PTPRN2	Body	shore	Body-shore	chr7:157890656-157891557	NA	NA
cg07647822	0.167888	0.182953	18.829	5.97004e-31	1.22873e-28	60.0867	0.0990084	0.266897	0.167888	3	24537349	F	II	THRB	TSS1500	island	TSS1500-island	chr3:24535844-24537436	TRUE	NA
cg26143452	-0.319217	0.453743	-18.8234	6.08687e-31	1.25085e-28	60.0673	0.613351	0.294134	-0.319217	14	55907385	R	I	TBPL2	TSS200	island	TSS200-island	chr14:55907197-55907433	NA	NA
cg05329352	-0.253376	0.573183	-18.8229	6.09759e-31	1.25241e-28	60.0656	0.699871	0.446496	-0.253376	10	112838983	R	II	ADRA2A	1stExon	island	1stExon-island	chr10:112835990-112839303	NA	NA
cg10278102	0.332078	0.420631	18.8183	6.1943e-31	1.27098e-28	60.0499	0.254592	0.58667	0.332078	11	20410216	F	II	PRMT3	5'UTR	shore	5'UTR-shore	chr11:20408755-20409781	NA	NA
cg01148781	-0.321251	0.6485	-18.8164	6.23525e-31	1.27873e-28	60.0433	0.809125	0.487874	-0.321251	8	99963021	F	II	OSR2	Body	shore	Body-shore	chr8:99960497-99961438	NA	NA
cg26333660	-0.241531	0.598573	-18.8157	6.24894e-31	1.28089e-28	60.0411	0.719338	0.477807	-0.241531	8	28625366	R	I	INTS9	3'UTR	opensea	3'UTR-opensea		NA	NA
cg17911539	-0.244628	0.570426	-18.8149	6.2679e-31	1.28412e-28	60.0381	0.69274	0.448112	-0.244628	3	126260814	F	I	CHST13	Body	island	Body-island	chr3:126260488-126261356	TRUE	NA		rs34311016
cg11168293	0.370841	0.634667	18.8146	6.27391e-31	1.28442e-28	60.0372	0.449247	0.820088	0.370841	22	49067022	F	I	FAM19A5	Body	shelf	Body-shelf	chr22:49063538-49063900	NA	NA		rs2057204
cg05188959	0.395813	0.64276	18.8145	6.27659e-31	1.28442e-28	60.0367	0.444854	0.840667	0.395813	17	77174625	R	II	HRNBP3	5'UTR	opensea	5'UTR-opensea		NA	NA
cg09262171	-0.480929	0.41094	-18.8143	6.27896e-31	1.28442e-28	60.0364	0.651404	0.170475	-0.480929	16	4140361	R	II	ADCY9	Body	opensea	Body-opensea		NA	TRUE
cg04360793	-0.438026	0.490666	-18.8124	6.32044e-31	1.29225e-28	60.0298	0.709679	0.271653	-0.438026	1	79472361	R	I	ELTD1	5'UTR	island	5'UTR-island	chr1:79472281-79472537	NA	TRUE
cg01293179	-0.509057	0.421493	-18.8115	6.34018e-31	1.29563e-28	60.0267	0.676022	0.166965	-0.509057	2	176996285	F	II	HOXD8	Body	shore	Body-shore	chr2:176993479-176995557	NA	NA
cg01972576	0.439231	0.656119	18.8071	6.43714e-31	1.31477e-28	60.0115	0.436504	0.875735	0.439231	8	143916273	R	I	GML	5'UTR	island	5'UTR-island	chr8:143916135-143916405	NA	NA			rs66944369
cg16739441	-0.457878	0.525999	-18.8058	6.46749e-31	1.31963e-28	60.0069	0.754938	0.29706	-0.457878	12	21926524	F	II	KCNJ8	Body	opensea	Body-opensea		NA	NA
cg23364373	0.358158	0.598053	18.7986	6.62894e-31	1.35052e-28	59.9823	0.418974	0.777132	0.358158	20	61167926	F	II	C20orf166	3'UTR	opensea	3'UTR-opensea		TRUE	NA			rs6143063
cg05172122	-0.254967	0.602552	-18.7976	6.65297e-31	1.35473e-28	59.9787	0.730036	0.475069	-0.254967	1	119526783	R	II	TBX15	5'UTR	island	5'UTR-island	chr1:119526782-119527192	NA	NA
cg24006721	-0.361666	0.444194	-18.7951	6.71039e-31	1.36573e-28	59.9701	0.625027	0.26336	-0.361666	1	25258225	F	I	RUNX3	TSS1500	island	TSS1500-island	chr1:25255527-25259005	NA	NA		rs3116868
cg26450106	0.430575	0.38753	18.7948	6.71657e-31	1.3663e-28	59.9692	0.172243	0.602817	0.430575	20	24929607	R	II	CST7	TSS1500	opensea	TSS1500-opensea		NA	NA
cg08690859	-0.328323	0.351763	-18.7944	6.72549e-31	1.36742e-28	59.9679	0.515924	0.187601	-0.328323	2	200333729	F	I	FLJ32063	Body	island	Body-island	chr2:200333687-200334172	NA	TRUE
cg14274357	-0.411657	0.60705	-18.7902	6.82384e-31	1.38672e-28	59.9534	0.812879	0.401221	-0.411657	14	105251402	F	I	AKT1	Body	island	Body-island	chr14:105251401-105251617	NA	TRUE		rs36214916	rs61759789
cg26077811	0.275795	0.298222	18.7864	6.91458e-31	1.40374e-28	59.9402	0.160324	0.436119	0.275795	11	119232263	R	II	USP2	Body	shelf	Body-shelf	chr11:119234480-119235214	TRUE	NA
cg18375236	0.230036	0.455917	18.7861	6.9199e-31	1.40411e-28	59.9394	0.340899	0.570935	0.230036	19	30024706	R	II	VSTM2B	Body	shelf	Body-shelf	chr19:30015781-30021367	NA	NA
cg12769118	0.438008	0.441429	18.7837	6.97789e-31	1.41445e-28	59.9311	0.222425	0.660433	0.438008	1	247712377	R	II	C1orf150	TSS200	opensea	TSS200-opensea		NA	NA
cg08162205	-0.196828	0.831268	-18.7806	7.05293e-31	1.42894e-28	59.9205	0.929682	0.732854	-0.196828	3	152109952	F	II	MBNL1	Body	opensea	Body-opensea		NA	TRUE			rs80182281
cg25227672	0.358212	0.639028	18.7793	7.08477e-31	1.43467e-28	59.916	0.459922	0.818134	0.358212	11	124805912	R	II	HEPACAM	5'UTR	opensea	5'UTR-opensea		NA	NA	low-CpG:124311077-124311574
cg05780177	0.149182	0.147743	18.7774	7.13248e-31	1.44361e-28	59.9093	0.073152	0.222334	0.149182	1	197744757	F	II	DENND1B	TSS200	island	TSS200-island	chr1:197743931-197744788	TRUE	TRUE	high-CpG:196010757-196011580
cg07815836	-0.267283	0.694295	-18.7765	7.15408e-31	1.44725e-28	59.9063	0.827937	0.560654	-0.267283	19	58715351	F	II	ZNF274	Body	island	Body-island	chr19:58715220-58716033	NA	NA
cg21296230	-0.455063	0.427038	-18.7736	7.22618e-31	1.46037e-28	59.8963	0.65457	0.199507	-0.455063	15	33010536	R	II	GREM1	5'UTR	island	5'UTR-island	chr15:33009530-33011696	TRUE	NA
cg11891393	-0.425827	0.459291	-18.7703	7.30801e-31	1.47542e-28	59.885	0.672205	0.246378	-0.425827	6	100911727	F	II	SIM1	TSS200	shore	TSS200-shore	chr6:100912071-100913337	TRUE	TRUE
cg07377422	-0.330215	0.576746	-18.7693	7.33273e-31	1.47967e-28	59.8817	0.741853	0.411638	-0.330215	19	46318633	F	I	RSPH6A	TSS200	island	TSS200-island	chr19:46318490-46319266	NA	NA		rs5828250
cg17466857	-0.427718	0.262866	-18.7656	7.42838e-31	1.49672e-28	59.8687	0.476725	0.0490067	-0.427718	7	27225528	F	I	HOXA11AS	Body	island	Body-island	chr7:27225050-27225629	NA	NA		rs17427875
cg17214456	-0.204286	0.801141	-18.7637	7.47714e-31	1.50579e-28	59.8622	0.903284	0.698998	-0.204286	12	102216984	F	II	GNPTAB	Body	opensea	Body-opensea		NA	TRUE
cg05436845	-0.227315	0.750763	-18.7568	7.65706e-31	1.54048e-28	59.8385	0.86442	0.637105	-0.227315	11	65378622	R	II	MAP3K11	Body	shelf	Body-shelf	chr11:65381582-65381872	NA	NA
cg21170796	-0.382641	0.540737	-18.7554	7.69337e-31	1.54701e-28	59.8338	0.732058	0.349417	-0.382641	1	119528164	F	II	TBX15	5'UTR	shore	5'UTR-shore	chr1:119529819-119530712	NA	NA
cg25630910	-0.31747	0.503815	-18.7431	8.02673e-31	1.61018e-28	59.7915	0.66255	0.34508	-0.31747	12	123753186	R	II	CDK2AP1	Body	shore	Body-shore	chr12:123754049-123754373	NA	TRUE
cg26492368	-0.36564	0.402929	-18.741	8.08726e-31	1.62055e-28	59.784	0.585749	0.220109	-0.36564	10	22634733	R	I	SPAG6	Body	island	Body-island	chr10:22634000-22634862	NA	NA
cg25027699	0.310388	0.419507	18.7387	8.15115e-31	1.63173e-28	59.7762	0.264313	0.574701	0.310388	12	101187093	R	II	ANO4	TSS1500	opensea	TSS1500-opensea		NA	NA
cg03283235	0.393321	0.613104	18.7231	8.60345e-31	1.71714e-28	59.7223	0.416444	0.809765	0.393321	12	130354828	F	II	TMEM132D	Body	opensea	Body-opensea		NA	TRUE
cg01012445	-0.219865	0.819019	-18.7201	8.69041e-31	1.73364e-28	59.7123	0.928951	0.709087	-0.219865	4	151504920	F	II	LRBA	Body	island	Body-island	chr4:151504011-151505085	NA	NA
cg21684012	-0.379099	0.276886	-18.716	8.81446e-31	1.75686e-28	59.6982	0.466435	0.087336	-0.379099	6	100912906	F	I	SIM1	TSS1500	island	TSS1500-island	chr6:100912071-100913337	TRUE	NA		rs3756916
cg11277090	0.302982	0.528268	18.7076	9.07679e-31	1.80713e-28	59.6689	0.376777	0.679759	0.302982	17	72848048	R	II	GRIN2C	Body	shore	Body-shore	chr17:72848166-72848901	TRUE	NA
cg11362010	-0.415463	0.595651	-18.7069	9.09697e-31	1.81026e-28	59.6667	0.803382	0.387919	-0.415463	3	181442713	R	II	SOX2OT	Body	shore	Body-shore	chr3:181444409-181445000	NA	TRUE
cg00043800	-0.178111	0.774384	-18.7066	9.10558e-31	1.81107e-28	59.6658	0.86344	0.685329	-0.178111	2	74612144	R	II	LOC100189589	TSS1500	opensea	TSS1500-opensea		NA	NA
cg09487078	0.345623	0.434688	18.7055	9.14302e-31	1.81672e-28	59.6617	0.261877	0.607499	0.345623	6	167525398	F	II	CCR6	5'UTR	opensea	5'UTR-opensea		NA	NA			rs75158174
cg08293483	0.296211	0.599255	18.7018	9.25787e-31	1.83773e-28	59.6492	0.45115	0.747361	0.296211	8	144294130	F	II	GPIHBP1	TSS1500	opensea	TSS1500-opensea		NA	NA		rs73715485
cg03602500	0.321305	0.742422	18.6993	9.34069e-31	1.85326e-28	59.6403	0.581769	0.903074	0.321305	19	55047721	R	II	KIR3DX1	Body	opensea	Body-opensea		NA	NA
cg18525486	-0.418146	0.455242	-18.6986	9.36345e-31	1.85594e-28	59.6379	0.664315	0.246169	-0.418146	3	62357176	R	II	FEZF2	Body	island	Body-island	chr3:62356773-62357315	NA	NA
cg16326402	-0.228336	0.783643	-18.6944	9.49995e-31	1.88114e-28	59.6235	0.897811	0.669474	-0.228336	2	158698856	R	II	ACVR1	5'UTR	opensea	5'UTR-opensea		NA	TRUE
cg10918927	0.0884568	0.106468	18.6929	9.54933e-31	1.88999e-28	59.6183	0.0622395	0.150696	0.0884568	12	54411193	F	II	HOXC4	5'UTR	shore	5'UTR-shore	chr12:54411709-54412131	NA	TRUE		rs985125
cg01275887	-0.193781	0.825786	-18.6927	9.55411e-31	1.89001e-28	59.6178	0.922676	0.728895	-0.193781	7	4747216	R	I	FOXK1	Body	opensea	Body-opensea		NA	TRUE		rs74974197
cg09426383	-0.396059	0.355933	-18.6893	9.66752e-31	1.9115e-28	59.606	0.553962	0.157904	-0.396059	7	26897182	F	I	SKAP2	Body	opensea	Body-opensea		NA	NA
cg12190994	-0.243203	0.771716	-18.6848	9.82138e-31	1.94097e-28	59.5903	0.893317	0.650114	-0.243203	7	4305061	F	II	SDK1	Body	island	Body-island	chr7:4303079-4305062	NA	NA
cg18804963	0.397669	0.686132	18.684	9.84597e-31	1.94488e-28	59.5878	0.487297	0.884966	0.397669	11	132456073	R	II	OPCML	Body	opensea	Body-opensea		NA	NA
cg11946503	-0.299236	0.297049	-18.6819	9.92013e-31	1.95856e-28	59.5803	0.446667	0.147431	-0.299236	5	134870514	F	I	NEUROG1	1stExon	shore	1stExon-shore	chr5:134870740-134872051	NA	NA		rs35758773
cg06206357	0.339608	0.440484	18.6795	1.00021e-30	1.97378e-28	59.5721	0.27068	0.610288	0.339608	7	101274027	R	II	MYL10	TSS1500	opensea	TSS1500-opensea		TRUE	TRUE
cg00793935	-0.461231	0.343078	-18.6785	1.00368e-30	1.97965e-28	59.5687	0.573693	0.112463	-0.461231	2	234847769	F	I	TRPM8	Body	island	Body-island	chr2:234847647-234847857	NA	NA
cg03299042	-0.263099	0.666945	-18.6764	1.01081e-30	1.99079e-28	59.5616	0.798494	0.535395	-0.263099	2	63283806	R	II	OTX1	3'UTR	shore	3'UTR-shore	chr2:63283936-63284147	NA	NA
cg23244790	-0.357814	0.276617	-18.6762	1.01161e-30	1.9914e-28	59.5608	0.455524	0.0977096	-0.357814	5	140811102	F	I	PCDHGA4	Body	island	Body-island	chr5:140810494-140812617	NA	NA
cg01759597	-0.394186	0.268764	-18.6754	1.01441e-30	1.99508e-28	59.5581	0.465857	0.0716707	-0.394186	7	96626788	F	I	DLX6AS	Body	opensea	Body-opensea		NA	NA
cg14001023	-0.435113	0.470047	-18.6739	1.01986e-30	2.00469e-28	59.5527	0.687604	0.252491	-0.435113	19	46526321	R	I	PGLYRP1	1stExon	island	1stExon-island	chr19:46526046-46526334	NA	NA
cg11625005	-0.325163	0.525039	-18.6685	1.03884e-30	2.03603e-28	59.5343	0.687621	0.362458	-0.325163	5	1295737	F	I	TERT	TSS1500	island	TSS1500-island	chr5:1289275-1295970	NA	NA
cg06888121	-0.333767	0.631495	-18.6652	1.05106e-30	2.05898e-28	59.5227	0.798379	0.464611	-0.333767	7	27169068	R	I	HOXA4	Body	shore	Body-shore	chr7:27169572-27170638	NA	NA		rs6976847
cg21063722	-0.488876	0.353836	-18.6638	1.05614e-30	2.06792e-28	59.5179	0.598274	0.109399	-0.488876	6	100911709	F	I	SIM1	TSS200	shore	TSS200-shore	chr6:100912071-100913337	TRUE	TRUE			rs80193484
cg24622143	0.356533	0.770432	18.6588	1.07431e-30	2.10044e-28	59.5009	0.592166	0.948698	0.356533	13	114780781	R	II	RASA3	Body	island	Body-island	chr13:114780692-114781048	NA	NA
cg23907852	0.263094	0.594971	18.6568	1.08194e-30	2.1133e-28	59.4938	0.463424	0.726518	0.263094	17	43922244	F	II	LOC100128977	Body	opensea	Body-opensea		NA	NA
cg19718882	-0.492676	0.401049	-18.6561	1.08454e-30	2.11734e-28	59.4914	0.647387	0.154711	-0.492676	11	32458714	R	II	WIT1	Body	shore	Body-shore	chr11:32459422-32459878	NA	NA
cg02865033	-0.168645	0.82508	-18.6535	1.09436e-30	2.13506e-28	59.4824	0.909402	0.740757	-0.168645	16	31235535	R	II	TRIM72	Body	island	Body-island	chr16:31235525-31236104	NA	NA
cg18015809	-0.12552	0.897268	-18.6534	1.09467e-30	2.13506e-28	59.4821	0.960028	0.834508	-0.12552	6	47202254	F	II	TNFRSF21	Body	opensea	Body-opensea		NA	NA			rs56896258
cg06301178	-0.433138	0.483382	-18.653	1.09608e-30	2.13677e-28	59.4809	0.699951	0.266813	-0.433138	16	31580150	R	II	CSDAP1	Body	island	Body-island	chr16:31580070-31580317	NA	NA
cg00470341	0.437343	0.609065	18.6522	1.09943e-30	2.14227e-28	59.4778	0.390393	0.827736	0.437343	2	183237787	F	II	PDE1A	Body	opensea	Body-opensea		TRUE	TRUE		rs833114
cg23413307	0.365813	0.629955	18.6506	1.10548e-30	2.15276e-28	59.4723	0.447048	0.812861	0.365813	1	152747472	F	II	LCE1F	TSS1500	opensea	TSS1500-opensea		NA	NA
cg24866792	0.294634	0.495812	18.6505	1.10589e-30	2.15276e-28	59.472	0.348495	0.643129	0.294634	20	31781333	R	II	BASE	TSS200	opensea	TSS200-opensea		NA	NA
cg08943107	-0.195807	0.777544	-18.6502	1.10701e-30	2.15389e-28	59.471	0.875448	0.67964	-0.195807	1	39943966	F	I	MACF1	Body	opensea	Body-opensea		NA	TRUE
cg05256269	-0.402955	0.445917	-18.6447	1.12804e-30	2.19058e-28	59.4522	0.647395	0.24444	-0.402955	2	176956841	F	II	HOXD13	TSS1500	shore	TSS1500-shore	chr2:176957054-176958279	NA	NA		rs13025738
cg23684410	0.38019	0.39565	18.6442	1.1302e-30	2.193e-28	59.4503	0.205555	0.585745	0.38019	11	116897558	R	II	SIK3	Body	opensea	Body-opensea		NA	TRUE
cg04458776	0.379182	0.618218	18.6442	1.13038e-30	2.193e-28	59.4501	0.428626	0.807809	0.379182	11	62753944	R	II	SLC22A6	TSS1500	opensea	TSS1500-opensea		NA	NA
cg19059861	0.320409	0.493598	18.6438	1.13186e-30	2.19399e-28	59.4488	0.333394	0.653803	0.320409	20	31823761	R	II	PLUNC	TSS200	opensea	TSS200-opensea		NA	NA
cg14319235	-0.396949	0.503606	-18.6389	1.15098e-30	2.22974e-28	59.4321	0.70208	0.305132	-0.396949	1	79472282	R	II	ELTD1	Body	island	Body-island	chr1:79472281-79472537	NA	TRUE
cg05562851	-0.287159	0.232972	-18.6369	1.1593e-30	2.2437e-28	59.4249	0.376552	0.0893929	-0.287159	12	121151805	R	II	UNC119B	Body	shelf	Body-shelf	chr12:121148239-121148853	TRUE	NA			rs78894536
cg01912955	-0.318603	0.490518	-18.636	1.16264e-30	2.24908e-28	59.4221	0.649819	0.331216	-0.318603	6	100906383	R	II	SIM1	Body	island	Body-island	chr6:100905952-100906686	NA	NA
cg26251506	-0.446199	0.389621	-18.6355	1.16487e-30	2.25232e-28	59.4202	0.612721	0.166522	-0.446199	7	96642163	R	II	DLX6AS	Body	shelf	Body-shelf	chr7:96645786-96646599	NA	NA
cg20994118	0.374723	0.511549	18.6344	1.1694e-30	2.25957e-28	59.4163	0.324188	0.698911	0.374723	1	209780966	R	II	CAMK1G	Body	opensea	Body-opensea		TRUE	NA
cg06142621	0.320397	0.692309	18.6323	1.17792e-30	2.27319e-28	59.409	0.53211	0.852507	0.320397	11	124805981	R	II	HEPACAM	5'UTR	opensea	5'UTR-opensea		NA	NA	low-CpG:124311077-124311574	rs28372748
cg14266527	-0.189296	0.830627	-18.6293	1.19004e-30	2.29547e-28	59.3988	0.925275	0.735979	-0.189296	4	151501298	F	II	LRBA	Body	island	Body-island	chr4:151500763-151501299	NA	NA
cg10896774	0.293241	0.309831	18.6287	1.19243e-30	2.29897e-28	59.3968	0.16321	0.456451	0.293241	7	142636840	F	II	C7orf34	1stExon	opensea	1stExon-opensea		NA	NA		rs6943031
cg23758305	-0.506089	0.327101	-18.6278	1.19628e-30	2.30529e-28	59.3936	0.580145	0.074056	-0.506089	8	70982867	F	II	PRDM14	5'UTR	island	5'UTR-island	chr8:70981873-70984888	TRUE	NA		rs78632565
cg14564076	-0.512688	0.384093	-18.6271	1.19927e-30	2.30996e-28	59.3911	0.640437	0.127749	-0.512688	7	153584873	F	II	DPP6	Body	island	Body-island	chr7:153583317-153585666	NA	NA
cg05937737	-0.422991	0.434223	-18.6268	1.2004e-30	2.31103e-28	59.3902	0.645718	0.222727	-0.422991	3	170303540	F	I	SLC7A14	5'UTR	island	5'UTR-island	chr3:170303532-170303768	NA	NA
cg11207307	-0.359822	0.4294	-18.6251	1.20749e-30	2.32356e-28	59.3843	0.609311	0.249489	-0.359822	12	8025593	R	I	SLC2A14	TSS200	island	TSS200-island	chr12:8025364-8025908	NA	NA
cg05784862	0.423622	0.617302	18.6247	1.209e-30	2.32536e-28	59.3831	0.405491	0.829112	0.423622	17	25799018	R	II	KSR1	TSS200	opensea	TSS200-opensea		NA	NA
cg13449377	-0.171217	0.846947	-18.6216	1.22222e-30	2.34854e-28	59.3722	0.932555	0.761339	-0.171217	7	96631089	F	II	DLX6AS	Body	shore	Body-shore	chr7:96631383-96631800	NA	TRUE
cg20972294	0.457794	0.627128	18.6209	1.22518e-30	2.3531e-28	59.3698	0.398231	0.856025	0.457794	11	133005919	R	II	OPCML	Body	opensea	Body-opensea		NA	TRUE
cg18909389	-0.263078	0.575873	-18.6197	1.23031e-30	2.36159e-28	59.3657	0.707412	0.444334	-0.263078	6	31701110	R	II	CLIC1	Body	shelf	Body-shelf	chr6:31695894-31698245	NA	NA
cg12290311	-0.338165	0.73194	-18.6196	1.23077e-30	2.36159e-28	59.3653	0.901022	0.562857	-0.338165	5	39424119	F	II	DAB2	5'UTR	shore	5'UTR-shore	chr5:39424892-39425320	NA	NA		rs60805730
cg26857670	-0.384094	0.289688	-18.6157	1.24748e-30	2.39136e-28	59.3518	0.481735	0.0976414	-0.384094	7	27225448	F	I	HOXA11AS	Body	island	Body-island	chr7:27225050-27225629	NA	NA		rs61744408
cg24988684	0.330491	0.295309	18.6155	1.24821e-30	2.39161e-28	59.3513	0.130063	0.460554	0.330491	17	76128556	F	II	TMC8	Body	shore	Body-shore	chr17:76127521-76128406	NA	NA
cg04573398	-0.203115	0.803156	-18.6142	1.25423e-30	2.40088e-28	59.3464	0.904714	0.701598	-0.203115	11	86086005	F	II	CCDC81	1stExon	island	1stExon-island	chr11:86085693-86086006	NA	TRUE
cg22378919	-0.396948	0.441756	-18.6082	1.28028e-30	2.44724e-28	59.326	0.64023	0.243281	-0.396948	1	119522188	R	II	TBX15	5'UTR	shore	5'UTR-shore	chr1:119522385-119522638	NA	NA
cg15834072	-0.374742	0.336342	-18.6055	1.29243e-30	2.46929e-28	59.3165	0.523713	0.148971	-0.374742	4	155411603	F	I	DCHS2	1stExon	island	1stExon-island	chr4:155410623-155413393	NA	NA		rs13130030
cg18615133	0.438434	0.516936	18.5958	1.33689e-30	2.55303e-28	59.2828	0.297719	0.736153	0.438434	12	116997095	F	II	MAP1LC3B2	TSS200	opensea	TSS200-opensea		TRUE	TRUE			rs73409112
cg11671688	-0.363608	0.469615	-18.5945	1.34287e-30	2.56201e-28	59.2784	0.651419	0.287811	-0.363608	6	110301075	F	I	GPR6	1stExon	island	1stExon-island	chr6:110299365-110301267	NA	NA
cg14224444	0.378982	0.647832	18.5936	1.34684e-30	2.56716e-28	59.2754	0.458341	0.837323	0.378982	6	118587190	F	II	SLC35F1	Body	opensea	Body-opensea		NA	NA
cg16477744	0.378614	0.731021	18.5917	1.35608e-30	2.58233e-28	59.2686	0.541713	0.920328	0.378614	7	157367142	R	II	PTPRN2	Body	shore	Body-shore	chr7:157369120-157369394	NA	NA
cg06580419	0.329734	0.583893	18.5891	1.36794e-30	2.60244e-28	59.2599	0.419025	0.74876	0.329734	2	215276156	F	II	VWC2L	TSS1500	opensea	TSS1500-opensea		NA	NA
cg02297801	0.276757	0.321827	18.5888	1.36948e-30	2.60414e-28	59.2588	0.183448	0.460205	0.276757	1	1710663	R	II	NADK	TSS1500	shore	TSS1500-shore	chr1:1709394-1710582	NA	NA
cg08587845	-0.253851	0.310008	-18.5871	1.37759e-30	2.61708e-28	59.2529	0.436934	0.183082	-0.253851	5	134870506	F	I	NEUROG1	1stExon	shore	1stExon-shore	chr5:134870740-134872051	NA	NA		rs35758773
cg24119869	0.382816	0.585363	18.5854	1.38564e-30	2.63114e-28	59.2471	0.393955	0.776771	0.382816	19	55043790	F	II	KIR3DX1	TSS200	opensea	TSS200-opensea		NA	NA		rs17606773
cg26524547	-0.21689	0.79946	-18.5834	1.39566e-30	2.64892e-28	59.2399	0.907905	0.691015	-0.21689	1	201820022	F	II	IPO9	Body	opensea	Body-opensea		NA	TRUE
cg12389770	-0.425783	0.476183	-18.5823	1.40079e-30	2.65739e-28	59.2362	0.689074	0.263292	-0.425783	6	101847706	R	II	GRIK2	Body	shore	Body-shore	chr6:101846766-101847135	NA	NA
cg22338152	0.406787	0.670643	18.5808	1.40833e-30	2.66919e-28	59.2309	0.467249	0.874037	0.406787	19	57642143	F	II	USP29	Body	opensea	Body-opensea		NA	NA
cg02205391	0.223217	0.217506	18.5752	1.43573e-30	2.71645e-28	59.2117	0.105898	0.329115	0.223217	6	31762409	R	II	VARS	Body	shore	Body-shore	chr6:31763240-31763905	NA	NA
cg22844623	-0.128696	0.834869	-18.5752	1.43597e-30	2.71645e-28	59.2115	0.899217	0.770521	-0.128696	1	228336130	R	II	GJC2	TSS1500	opensea	TSS1500-opensea		NA	NA
cg09542210	-0.587316	0.375647	-18.5741	1.44143e-30	2.72551e-28	59.2077	0.669304	0.0819886	-0.587316	3	157821536	F	II	SHOX2	Body	island	Body-island	chr3:157821232-157821604	NA	NA
cg27579097	0.287416	0.679233	18.5713	1.45544e-30	2.75069e-28	59.1981	0.535525	0.822941	0.287416	16	734844	R	I	JMJD8	TSS1500	island	TSS1500-island	chr16:729438-735815	NA	NA
cg18182111	-0.593168	0.390107	-18.5697	1.46371e-30	2.76503e-28	59.1924	0.686691	0.0935223	-0.593168	5	37835111	F	II	GDNF	5'UTR	island	5'UTR-island	chr5:37834671-37835128	TRUE	TRUE
cg01349621	0.340007	0.564728	18.5672	1.47629e-30	2.78617e-28	59.1839	0.394724	0.734732	0.340007	20	61165941	F	II	C20orf166	Body	opensea	Body-opensea		NA	NA
cg17542408	-0.506186	0.342601	-18.5632	1.49669e-30	2.82336e-28	59.1702	0.595694	0.0895079	-0.506186	11	78673100	F	I	ODZ4	Body	island	Body-island	chr11:78673007-78673213	NA	TRUE
cg17825194	-0.282241	0.46351	-18.5611	1.50805e-30	2.84344e-28	59.1627	0.60463	0.32239	-0.282241	12	124864681	F	II	NCOR2	Body	opensea	Body-opensea		TRUE	NA
cg01049782	0.357344	0.644365	18.559	1.51897e-30	2.86135e-28	59.1555	0.465693	0.823037	0.357344	7	30717954	F	II	CRHR2	Body	shelf	Body-shelf	chr7:30721372-30722445	NA	NA
cg11147155	-0.397411	0.51503	-18.5571	1.52898e-30	2.87595e-28	59.1489	0.713735	0.316324	-0.397411	1	150595206	F	II	ENSA	3'UTR	opensea	3'UTR-opensea		NA	NA
cg02654940	0.348605	0.613309	18.551	1.56186e-30	2.93529e-28	59.1277	0.439006	0.787611	0.348605	6	34206400	F	II	HMGA1	5'UTR	shore	5'UTR-shore	chr6:34202567-34206193	NA	NA			rs2780223
cg14591001	0.343022	0.54409	18.5503	1.56569e-30	2.94111e-28	59.1253	0.372579	0.715601	0.343022	12	132690752	F	I	GALNT9	Body	shore	Body-shore	chr12:132689880-132690197	TRUE	NA
cg24977541	0.436372	0.631662	18.55	1.5669e-30	2.94201e-28	59.1245	0.413476	0.849848	0.436372	3	170305197	R	II	SLC7A14	TSS1500	shore	TSS1500-shore	chr3:170303044-170303249	NA	NA
cg24468890	0.209892	0.283317	18.5495	1.56967e-30	2.94584e-28	59.1227	0.178371	0.388263	0.209892	1	32757294	R	II	HDAC1	TSS1500	shore	TSS1500-shore	chr1:32757414-32758034	NA	NA
cg19134568	-0.329409	0.469478	-18.547	1.5836e-30	2.97058e-28	59.1139	0.634183	0.304774	-0.329409	4	147561339	R	II	POU4F2	Body	island	Body-island	chr4:147559205-147561901	NA	TRUE
cg19790509	0.359532	0.671087	18.5468	1.58447e-30	2.97084e-28	59.1134	0.491321	0.850853	0.359532	12	130040893	F	I	TMEM132D	Body	opensea	Body-opensea		NA	NA
cg01181150	0.343541	0.707897	18.5407	1.61865e-30	3.02364e-28	59.0921	0.536126	0.879668	0.343541	7	154407878	R	II	DPP6	Body	opensea	Body-opensea		NA	NA
cg27096172	0.377965	0.668074	18.5403	1.62105e-30	3.02533e-28	59.0906	0.479091	0.857056	0.377965	7	158350433	R	II	PTPRN2	Body	shore	Body-shore	chr7:158349387-158350091	NA	NA
cg26128092	-0.474385	0.376607	-18.5381	1.63347e-30	3.0471e-28	59.083	0.613799	0.139414	-0.474385	1	3567550	F	II	WDR8	TSS1500	island	TSS1500-island	chr1:3566445-3569636	NA	NA		rs77609057
cg23774016	0.356269	0.712903	18.5329	1.66288e-30	3.09477e-28	59.0652	0.534768	0.891037	0.356269	1	159284082	F	II	OR10J3	1stExon	opensea	1stExon-opensea		NA	NA
cg20444218	-0.176022	0.8012	-18.5316	1.67057e-30	3.10766e-28	59.0606	0.889211	0.713189	-0.176022	11	73024037	F	II	ARHGEF17	Body	shelf	Body-shelf	chr11:73018452-73020563	NA	NA
cg08692733	-0.41373	0.421768	-18.5288	1.68725e-30	3.13579e-28	59.0507	0.628632	0.214903	-0.41373	10	112404738	R	II	RBM20	Body	shore	Body-shore	chr10:112402953-112404328	NA	NA
cg12598524	-0.559759	0.359252	-18.5285	1.68858e-30	3.13681e-28	59.0499	0.639132	0.0793727	-0.559759	2	46088325	R	II	PRKCE	Body	opensea	Body-opensea		NA	TRUE
cg01886524	0.364077	0.601341	18.5273	1.69558e-30	3.14763e-28	59.0458	0.419302	0.783379	0.364077	3	128225824	F	II	LOC90246	TSS1500	opensea	TSS1500-opensea		NA	NA
cg26485825	0.393337	0.673078	18.527	1.69758e-30	3.14916e-28	59.0446	0.47641	0.869747	0.393337	18	21452895	R	II	LAMA3	TSS200	opensea	TSS200-opensea		NA	NA
cg19927816	-0.215993	0.615119	-18.5261	1.70324e-30	3.15676e-28	59.0413	0.723115	0.507122	-0.215993	19	46319153	R	I	SYMPK	Body	island	Body-island	chr19:46318490-46319266	NA	NA
cg26766064	0.406709	0.576261	18.5207	1.73495e-30	3.21256e-28	59.0229	0.372907	0.779616	0.406709	17	79099711	R	II	MIR657	TSS1500	shelf	TSS1500-shelf	chr17:79102748-79102970	NA	NA
cg04095069	-0.274311	0.739889	-18.5134	1.78017e-30	3.29478e-28	58.9972	0.877044	0.602733	-0.274311	7	151064240	R	II	NUB1	Body	opensea	Body-opensea		NA	NA
cg13982098	-0.319707	0.467591	-18.5117	1.79045e-30	3.31228e-28	58.9915	0.627445	0.307738	-0.319707	5	87955859	F	II	LOC645323	Body	island	Body-island	chr5:87955638-87955864	NA	NA
cg09706133	0.263051	0.360966	18.5105	1.79802e-30	3.32477e-28	58.9873	0.22944	0.492491	0.263051	15	68659758	R	II	ITGA11	Body	opensea	Body-opensea		NA	TRUE
cg07375150	0.432599	0.350555	18.5068	1.82145e-30	3.36653e-28	58.9744	0.134256	0.566855	0.432599	3	151046450	R	II	P2RY13	Body	opensea	Body-opensea		NA	NA
cg13560452	-0.320287	0.615768	-18.5031	1.84488e-30	3.40828e-28	58.9616	0.775912	0.455624	-0.320287	6	137813584	F	II	OLIG3	1stExon	shore	1stExon-shore	chr6:137814355-137815202	NA	NA
cg16704889	-0.298582	0.64769	-18.5014	1.85608e-30	3.4274e-28	58.9556	0.796981	0.498399	-0.298582	6	31696729	F	II	DDAH2	Body	island	Body-island	chr6:31695894-31698245	NA	NA
cg00216961	0.291183	0.231674	18.5005	1.86184e-30	3.43646e-28	58.9525	0.0860824	0.377265	0.291183	12	6054731	F	II	ANO2	Body	opensea	Body-opensea		TRUE	NA		rs6489681
cg04161526	-0.325893	0.529782	-18.497	1.88432e-30	3.47634e-28	58.9405	0.692728	0.366835	-0.325893	6	31696519	F	II	DDAH2	Body	island	Body-island	chr6:31695894-31698245	NA	NA
cg17585031	0.322526	0.594928	18.4959	1.89138e-30	3.48777e-28	58.9368	0.433665	0.756192	0.322526	17	25798942	F	II	KSR1	TSS200	opensea	TSS200-opensea		NA	NA
cg24469464	-0.277811	0.649031	-18.4949	1.89851e-30	3.49932e-28	58.933	0.787936	0.510125	-0.277811	4	4860157	F	II	MSX1	TSS1500	island	TSS1500-island	chr4:4859632-4860191	NA	NA
cg06335867	-0.438768	0.463022	-18.4944	1.90191e-30	3.50397e-28	58.9313	0.682406	0.243638	-0.438768	7	8482325	F	I	NXPH1	Body	island	Body-island	chr7:8481974-8482762	NA	NA
cg11540692	-0.339362	0.449631	-18.4938	1.90534e-30	3.5087e-28	58.9295	0.619312	0.27995	-0.339362	6	100912072	R	II	SIM1	TSS1500	island	TSS1500-island	chr6:100912071-100913337	TRUE	TRUE			rs73494628
cg03635766	-0.291398	0.731429	-18.491	1.9242e-30	3.54018e-28	58.9196	0.877129	0.58573	-0.291398	17	38607865	F	II	IGFBP4	Body	opensea	Body-opensea		TRUE	TRUE
cg07661480	-0.249573	0.675834	-18.4865	1.95484e-30	3.59238e-28	58.9039	0.80062	0.551047	-0.249573	18	46447737	R	I	SMAD7	3'UTR	island	3'UTR-island	chr18:46447718-46448083	NA	TRUE
cg15322516	-0.400725	0.516854	-18.4852	1.96317e-30	3.60528e-28	58.8996	0.717216	0.316491	-0.400725	14	104145810	R	II	KLC1	Body	opensea	Body-opensea		TRUE	NA
cg23339656	0.345088	0.509691	18.4839	1.97234e-30	3.61883e-28	58.895	0.337147	0.682235	0.345088	2	234159882	R	II	ATG16L1	TSS1500	shore	TSS1500-shore	chr2:234160100-234160735	NA	NA
cg03731303	-0.349284	0.637294	-18.474	2.04174e-30	3.73934e-28	58.8605	0.811936	0.462652	-0.349284	3	181443009	F	II	SOX2OT	Body	shore	Body-shore	chr3:181444409-181445000	NA	TRUE
cg14174204	0.144023	0.172628	18.4735	2.04497e-30	3.74355e-28	58.8589	0.100616	0.24464	0.144023	2	63276700	F	II	OTX1	TSS1500	island	TSS1500-island	chr2:63274475-63279430	NA	TRUE
cg13217260	-0.504251	0.328801	-18.4732	2.04714e-30	3.74583e-28	58.8579	0.580926	0.0766758	-0.504251	2	176981469	R	II	HOXD10	TSS200	shore	TSS200-shore	chr2:176982107-176982402	TRUE	NA
cg08668790	-0.58565	0.39752	-18.4725	2.05268e-30	3.75254e-28	58.8552	0.690345	0.104695	-0.58565	19	58220662	F	II	ZNF154	TSS200	shore	TSS200-shore	chr19:58220189-58220517	TRUE	NA
cg22143352	-0.289582	0.724861	-18.4635	2.11798e-30	3.86489e-28	58.824	0.869652	0.58007	-0.289582	14	75897841	R	II	JDP2	5'UTR	shelf	5'UTR-shelf	chr14:75894308-75895469	NA	NA
cg10243939	-0.504169	0.338018	-18.4551	2.18087e-30	3.97605e-28	58.7948	0.590103	0.0859332	-0.504169	7	96654788	F	II	DLX5	TSS1500	shore	TSS1500-shore	chr7:96653467-96654199	NA	NA
cg14583124	-0.236875	0.741214	-18.4543	2.18638e-30	3.98387e-28	58.7923	0.859651	0.622776	-0.236875	4	186207871	F	II	SNX25	Body	opensea	Body-opensea		NA	TRUE
cg13435326	-0.298477	0.729221	-18.4542	2.18714e-30	3.98387e-28	58.7919	0.878459	0.579982	-0.298477	3	178907655	F	II	PIK3CA	5'UTR	opensea	5'UTR-opensea		NA	TRUE
cg00744739	0.441814	0.632442	18.4537	2.19163e-30	3.99024e-28	58.7899	0.411535	0.853349	0.441814	2	240983326	R	II	PRR21	TSS1500	shore	TSS1500-shore	chr2:240981401-240981865	NA	NA
cg26681770	-0.4489	0.420621	-18.4505	2.21609e-30	4.0293e-28	58.7788	0.645071	0.196171	-0.4489	20	56247302	F	I	PMEPA1	5'UTR	island	5'UTR-island	chr20:56247249-56247651	NA	NA		rs36008751
cg26467949	0.310312	0.397331	18.4438	2.26858e-30	4.12288e-28	58.7554	0.242174	0.552487	0.310312	2	73441162	R	II	SMYD5	TSS1500	shore	TSS1500-shore	chr2:73441313-73441817	NA	NA
cg08766099	-0.192607	0.737891	-18.4431	2.27412e-30	4.13109e-28	58.753	0.834195	0.641588	-0.192607	4	734746	F	I	PCGF3	Body	shelf	Body-shelf	chr4:738424-741517	NA	TRUE
cg00305193	-0.241344	0.649135	-18.4405	2.2945e-30	4.16435e-28	58.7441	0.769807	0.528463	-0.241344	1	26158583	R	II	FAM54B	3'UTR	opensea	3'UTR-opensea		NA	NA
cg18901278	0.242238	0.242686	18.4403	2.29649e-30	4.16608e-28	58.7432	0.121567	0.363805	0.242238	17	76128531	F	II	TMC8	Body	shore	Body-shore	chr17:76127521-76128406	NA	NA			rs61755873
cg24220178	-0.248996	0.729192	-18.4381	2.31403e-30	4.19601e-28	58.7357	0.85369	0.604694	-0.248996	17	80541649	R	I	FOXK2	Body	island	Body-island	chr17:80541548-80541754	NA	NA
cg15015426	0.360542	0.415662	18.4379	2.31545e-30	4.19669e-28	58.735	0.235391	0.595933	0.360542	1	159506559	F	II	OR10J5	TSS1500	opensea	TSS1500-opensea		NA	NA			rs77767332
cg23737737	-0.374617	0.405931	-18.4374	2.31963e-30	4.20238e-28	58.7332	0.59324	0.218623	-0.374617	12	6665370	R	I	IFFO1	TSS200	shore	TSS200-shore	chr12:6664425-6665336	NA	NA
cg16997642	-0.361337	0.7093	-18.4367	2.32509e-30	4.20848e-28	58.7309	0.889969	0.528632	-0.361337	7	27184159	R	II	HOXA5	TSS1500	island	TSS1500-island	chr7:27182613-27185562	NA	NA
cg18428006	0.288672	0.583491	18.4345	2.34309e-30	4.23911e-28	58.7232	0.439155	0.727827	0.288672	5	177633449	F	I	HNRNPAB	Body	shore	Body-shore	chr5:177631219-177632508	NA	NA
cg22941668	-0.261059	0.666497	-18.4344	2.34412e-30	4.23911e-28	58.7228	0.797026	0.535967	-0.261059	5	148810180	F	I	MIR145	TSS200	opensea	TSS200-opensea		TRUE	TRUE
cg20939662	-0.405993	0.532484	-18.4336	2.35086e-30	4.24939e-28	58.7199	0.73548	0.329488	-0.405993	9	126777160	R	II	LHX2	Body	island	Body-island	chr9:126773246-126780953	NA	NA
cg09226786	-0.369732	0.251665	-18.4309	2.37279e-30	4.28325e-28	58.7107	0.436531	0.0667992	-0.369732	7	96622204	R	I	DLX6AS	Body	opensea	Body-opensea		NA	TRUE
cg01213381	-0.490118	0.39336	-18.43	2.37989e-30	4.29274e-28	58.7077	0.638419	0.148301	-0.490118	14	57277761	R	II	OTX2	TSS1500	shore	TSS1500-shore	chr14:57278068-57278287	NA	NA
cg07211472	-0.210291	0.602262	-18.4285	2.39233e-30	4.31272e-28	58.7025	0.707408	0.497117	-0.210291	7	4304846	R	I	SDK1	Body	island	Body-island	chr7:4303079-4305062	NA	NA
cg06345789	0.188131	0.236885	18.4246	2.42544e-30	4.3685e-28	58.6888	0.14282	0.330951	0.188131	17	43325791	R	I	LOC100133991	Body	shore	Body-shore	chr17:43324689-43325729	NA	NA
cg26249245	0.201362	0.548321	18.424	2.43025e-30	4.3752e-28	58.6868	0.44764	0.649002	0.201362	7	101915942	R	II	CUX1	Body	opensea	Body-opensea		NA	TRUE
cg09015973	-0.475428	0.449926	-18.4228	2.44092e-30	4.39244e-28	58.6824	0.68764	0.212212	-0.475428	2	131673771	R	I	ARHGEF4	TSS1500	island	TSS1500-island	chr2:131673686-131674150	NA	NA
cg20849025	0.387224	0.712939	18.4221	2.44688e-30	4.40119e-28	58.68	0.519327	0.906552	0.387224	11	58981043	F	II	MPEG1	TSS1500	opensea	TSS1500-opensea		NA	NA
cg03857553	0.265169	0.386471	18.4217	2.45051e-30	4.40576e-28	58.6785	0.253886	0.519055	0.265169	22	29976613	F	II	NIPSNAP1	Body	shore	Body-shore	chr22:29976920-29977216	NA	NA
cg24504361	0.336788	0.462185	18.4208	2.45746e-30	4.41628e-28	58.6757	0.293791	0.630579	0.336788	12	53297987	R	II	KRT8	Body	shore	Body-shore	chr12:53297442-53297824	TRUE	TRUE
cg16433074	-0.242577	0.731096	-18.42	2.4648e-30	4.4275e-28	58.6727	0.852384	0.609807	-0.242577	4	41050961	R	I	APBB2	5'UTR	opensea	5'UTR-opensea		NA	NA
cg24144440	-0.321243	0.465362	-18.412	2.53428e-30	4.5361e-28	58.645	0.625984	0.304741	-0.321243	1	119526882	R	II	TBX15	5'UTR	island	5'UTR-island	chr1:119526782-119527192	TRUE	NA
cg11932205	0.319998	0.602138	18.4118	2.53659e-30	4.53822e-28	58.6441	0.442139	0.762137	0.319998	7	37888257	F	I	TXNDC3	1stExon	opensea	1stExon-opensea		NA	NA
cg03719032	0.279761	0.320146	18.4065	2.58392e-30	4.61878e-28	58.6256	0.180265	0.460027	0.279761	19	19374710	R	II	HAPLN4	TSS1500	shelf	TSS1500-shelf	chr19:19371675-19372393	NA	NA
cg20002177	-0.372144	0.599276	-18.4019	2.62567e-30	4.68718e-28	58.6096	0.785348	0.413204	-0.372144	7	96649956	R	II	DLX5	3'UTR	shore	3'UTR-shore	chr7:96650221-96651551	NA	NA
cg05477457	-0.4387	0.286445	-18.4015	2.62939e-30	4.69173e-28	58.6082	0.505795	0.0670948	-0.4387	4	169799308	F	I	PALLD	Body	island	Body-island	chr4:169799086-169799625	TRUE	NA
cg02081065	-0.226469	0.841549	-18.3976	2.66516e-30	4.75133e-28	58.5948	0.954784	0.728315	-0.226469	5	132209139	F	II	LEAP2	TSS1500	opensea	TSS1500-opensea		NA	NA
cg19447686	0.222249	0.255857	18.3953	2.6867e-30	4.78761e-28	58.5867	0.144733	0.366982	0.222249	12	53448085	F	I	TENC1	Body	island	Body-island	chr12:53448008-53448406	NA	NA
cg12346967	0.298029	0.752511	18.3937	2.70165e-30	4.80999e-28	58.5812	0.603496	0.901526	0.298029	21	32185331	F	II	KRTAP8-1	1stExon	opensea	1stExon-opensea		NA	NA		rs74429119
cg08677655	-0.334409	0.414523	-18.3877	2.75925e-30	4.90604e-28	58.5602	0.581727	0.247318	-0.334409	17	1549108	R	I	SCARF1	TSS200	shore	TSS200-shore	chr17:1546742-1547324	NA	NA
cg00804803	-0.188275	0.856616	-18.3873	2.76312e-30	4.90864e-28	58.5588	0.950754	0.762479	-0.188275	1	10601595	R	I	PEX14	Body	opensea	Body-opensea		NA	NA
cg09117114	-0.24381	0.561029	-18.3869	2.76643e-30	4.91229e-28	58.5576	0.682934	0.439124	-0.24381	16	67998030	R	I	SLC12A4	Body	shelf	Body-shelf	chr16:68001916-68002462	NA	NA
cg23665216	-0.177372	0.801684	-18.3851	2.78417e-30	4.93944e-28	58.5512	0.89037	0.712998	-0.177372	14	105916422	F	I	MTA1	Body	shore	Body-shore	chr14:105915521-105915931	NA	NA
cg27615388	-0.376396	0.313151	-18.3834	2.80112e-30	4.96731e-28	58.5451	0.501349	0.124953	-0.376396	5	63257092	R	I	HTR1A	1stExon	island	1stExon-island	chr5:63256548-63257886	NA	NA
cg00058879	-0.486563	0.375904	-18.3818	2.81657e-30	4.99251e-28	58.5397	0.619185	0.132622	-0.486563	22	40082173	F	II	CACNA1I	Body	island	Body-island	chr22:40081519-40082390	NA	NA
cg00486340	-0.400006	0.354606	-18.3761	2.87367e-30	5.09148e-28	58.5196	0.554609	0.154603	-0.400006	4	4860026	F	II	MSX1	TSS1500	island	TSS1500-island	chr4:4859632-4860191	NA	NA
cg16528585	0.405517	0.641265	18.3748	2.88632e-30	5.11164e-28	58.5153	0.438506	0.844023	0.405517	14	65464312	F	II	FNTB	Body	opensea	Body-opensea		NA	TRUE
cg02561912	-0.532272	0.412805	-18.3736	2.89822e-30	5.1297e-28	58.5111	0.678941	0.146669	-0.532272	20	50158202	F	II	NFATC2	Body	shore	Body-shore	chr20:50158904-50159509	TRUE	TRUE
cg16146033	0.311515	0.327805	18.3707	2.92799e-30	5.17721e-28	58.501	0.172047	0.483562	0.311515	11	62767323	R	II	SLC22A8	Body	opensea	Body-opensea		NA	NA
cg14537825	0.259944	0.398135	18.3698	2.93773e-30	5.18765e-28	58.4976	0.268163	0.528107	0.259944	2	98344873	F	II	ZAP70	Body	shelf	Body-shelf	chr2:98340397-98340959	TRUE	NA
cg04238199	0.348325	0.490729	18.3697	2.93826e-30	5.18765e-28	58.4975	0.316566	0.664891	0.348325	5	7831537	R	II	C5orf49	3'UTR	opensea	3'UTR-opensea		NA	NA
cg00175487	0.397632	0.616017	18.3694	2.94161e-30	5.19129e-28	58.4963	0.417201	0.814833	0.397632	14	101490186	F	II	MIR380	TSS1500	opensea	TSS1500-opensea		NA	NA
cg07318128	-0.211659	0.840834	-18.3689	2.94663e-30	5.19786e-28	58.4946	0.946664	0.735004	-0.211659	17	46683806	F	II	HOXB6	TSS1500	shore	TSS1500-shore	chr17:46685244-46685449	NA	NA		rs9903182
cg04812644	0.416984	0.626977	18.364	2.99706e-30	5.27992e-28	58.4777	0.418485	0.835469	0.416984	8	136302000	R	II	LOC286094	Body	opensea	Body-opensea		NA	NA
cg13681701	-0.3521	0.350256	-18.364	2.99708e-30	5.27992e-28	58.4777	0.526306	0.174206	-0.3521	5	1103910	R	II	SLC12A7	Body	shelf	Body-shelf	chr5:1099943-1100764	NA	NA
cg14658493	-0.313405	0.738745	-18.3629	3.00869e-30	5.29805e-28	58.4738	0.895448	0.582042	-0.313405	7	27184077	R	II	HOXA5	TSS1500	island	TSS1500-island	chr7:27182613-27185562	NA	NA
cg15336438	0.250299	0.251967	18.3625	3.01278e-30	5.30292e-28	58.4725	0.126817	0.377116	0.250299	10	76993893	R	II	COMTD1	Body	island	Body-island	chr10:76993892-76995953	NA	NA			rs1054321
cg07555731	0.373403	0.548121	18.3589	3.05113e-30	5.36574e-28	58.4599	0.361419	0.734823	0.373403	14	21624639	F	II	OR5AU1	TSS1500	opensea	TSS1500-opensea		NA	NA
cg23262274	-0.433051	0.390344	-18.3569	3.0724e-30	5.40078e-28	58.4529	0.60687	0.173818	-0.433051	1	38412519	R	II	INPP5B	5'UTR	opensea	5'UTR-opensea		NA	NA	low-CpG:38185100-38185328
cg16792302	-0.362271	0.587631	-18.3529	3.11664e-30	5.46899e-28	58.4387	0.768766	0.406495	-0.362271	2	172945058	R	I	MAP1D	Body	island	Body-island	chr2:172944988-172945384	NA	NA
cg11312462	0.372179	0.647187	18.3495	3.15402e-30	5.52976e-28	58.4268	0.461097	0.833277	0.372179	17	10213042	R	I	MYH13	Body	opensea	Body-opensea		NA	NA
cg06659338	-0.229459	0.731008	-18.3446	3.20748e-30	5.62103e-28	58.41	0.845737	0.616278	-0.229459	1	54562040	F	II	C1orf83	Body	opensea	Body-opensea		NA	NA
cg15391590	0.491843	0.494001	18.3431	3.22451e-30	5.64843e-28	58.4047	0.248079	0.739923	0.491843	6	52913427	F	II	ICK	5'UTR	opensea	5'UTR-opensea		NA	TRUE		rs11459571
cg12608433	-0.27123	0.520552	-18.3394	3.26701e-30	5.71789e-28	58.3917	0.656167	0.384937	-0.27123	2	172945144	F	II	MAP1D	3'UTR	island	3'UTR-island	chr2:172944988-172945384	NA	NA
cg05649391	0.43541	0.716104	18.3391	3.27026e-30	5.7211e-28	58.3907	0.498399	0.933809	0.43541	11	47359115	R	I	MYBPC3	Body	shore	Body-shore	chr11:47359953-47360216	NA	NA
cg17495130	-0.521314	0.41281	-18.3382	3.28076e-30	5.73697e-28	58.3875	0.673467	0.152153	-0.521314	2	176960255	R	II	HOXD13	3'UTR	shore	3'UTR-shore	chr2:176962179-176962487	NA	NA
cg00509996	0.334425	0.602809	18.3352	3.31561e-30	5.79036e-28	58.377	0.435597	0.770021	0.334425	4	7595397	R	I	SORCS2	Body	shore	Body-shore	chr4:7593369-7593586	NA	NA
cg11966450	0.145035	0.135461	18.3344	3.32432e-30	5.80053e-28	58.3743	0.0629432	0.207978	0.145035	18	59992157	R	I	TNFRSF11A	TSS1500	island	TSS1500-island	chr18:59992069-59993556	TRUE	NA
cg18773260	-0.224711	0.760647	-18.3339	3.33006e-30	5.80803e-28	58.3726	0.873003	0.648292	-0.224711	17	46685292	F	II	HOXB7	Body	island	Body-island	chr17:46685244-46685449	NA	NA		rs1042216
cg15815827	-0.413656	0.443073	-18.3299	3.3772e-30	5.8826e-28	58.3586	0.649901	0.236245	-0.413656	20	61546407	R	II	DIDO1	5'UTR	shelf	5'UTR-shelf	chr20:61542354-61542877	TRUE	NA
cg04456238	-0.342639	0.588295	-18.327	3.41197e-30	5.9385e-28	58.3484	0.759614	0.416975	-0.342639	11	32450104	R	II	WT1	Body	shore	Body-shore	chr11:32448261-32449744	NA	NA
cg02521750	-0.240346	0.762386	-18.327	3.41225e-30	5.9385e-28	58.3483	0.88256	0.642213	-0.240346	16	81712054	R	I	CMIP	Body	island	Body-island	chr16:81711864-81712214	NA	NA
cg07109115	-0.333429	0.493278	-18.3243	3.4445e-30	5.98518e-28	58.3389	0.659992	0.326563	-0.333429	10	28030398	R	II	MKX	Body	island	Body-island	chr10:28030182-28035211	NA	NA
cg24951100	0.286917	0.271307	18.3242	3.44531e-30	5.98518e-28	58.3387	0.127849	0.414766	0.286917	10	13760075	R	II	FRMD4A	Body	opensea	Body-opensea		TRUE	TRUE
cg00154357	-0.322336	0.484999	-18.3241	3.4465e-30	5.98518e-28	58.3383	0.646168	0.323831	-0.322336	3	147111280	R	I	ZIC4	Body	island	Body-island	chr3:147108511-147111703	TRUE	NA
cg07074042	0.348283	0.506918	18.3185	3.51451e-30	6.09863e-28	58.3188	0.332777	0.68106	0.348283	22	30783944	R	I	RNF215	TSS1500	shore	TSS1500-shore	chr22:30783010-30783620	NA	NA
cg20292112	-0.355762	0.487679	-18.3171	3.53191e-30	6.12029e-28	58.3139	0.66556	0.309798	-0.355762	2	176963948	F	II	HOXD12	TSS1500	shore	TSS1500-shore	chr2:176964062-176965509	NA	TRUE
cg25929202	0.354255	0.754569	18.3099	3.62199e-30	6.26559e-28	58.2888	0.577442	0.931697	0.354255	3	131755265	F	II	CPNE4	TSS1500	shore	TSS1500-shore	chr3:131753880-131754139	NA	NA		rs77465739
cg23251248	-0.294327	0.674031	-18.3049	3.68689e-30	6.37452e-28	58.2711	0.821195	0.526867	-0.294327	14	55907374	R	I	TBPL2	TSS200	island	TSS200-island	chr14:55907197-55907433	NA	NA
cg26804595	0.289983	0.489541	18.3048	3.68813e-30	6.37452e-28	58.2708	0.344549	0.634532	0.289983	16	749581	R	II	FBXL16	5'UTR	shore	5'UTR-shore	chr16:750398-751451	NA	NA
cg01565438	-0.322293	0.575473	-18.3043	3.69425e-30	6.38237e-28	58.2691	0.736619	0.414327	-0.322293	17	33776554	R	II	SLFN13	TSS1500	island	TSS1500-island	chr17:33776553-33776888	NA	NA
cg22209355	0.312239	0.495051	18.2988	3.76609e-30	6.5009e-28	58.2499	0.338932	0.65117	0.312239	11	133208307	R	I	OPCML	Body	opensea	Body-opensea		NA	TRUE
cg12233363	-0.326801	0.335682	-18.2986	3.7695e-30	6.50399e-28	58.249	0.499082	0.172281	-0.326801	6	100913030	R	I	SIM1	TSS1500	island	TSS1500-island	chr6:100912071-100913337	TRUE	NA
cg17523415	-0.183081	0.839204	-18.2928	3.84684e-30	6.63174e-28	58.2287	0.930745	0.747664	-0.183081	10	126765380	R	II	CTBP2	5'UTR	opensea	5'UTR-opensea		NA	TRUE
cg00750917	0.371911	0.732736	18.2878	3.91497e-30	6.74257e-28	58.2112	0.54678	0.918691	0.371911	8	139507782	R	II	FAM135B	5'UTR	shore	5'UTR-shore	chr8:139508795-139509774	NA	NA
cg09432154	0.350647	0.429656	18.2877	3.91615e-30	6.74257e-28	58.2109	0.254333	0.604979	0.350647	3	151034669	F	II	MED12L	Body	opensea	Body-opensea		NA	NA
cg23424043	0.408506	0.498765	18.2871	3.9246e-30	6.75281e-28	58.2088	0.294512	0.703019	0.408506	7	138795004	F	II	ZC3HAV1	TSS1500	shore	TSS1500-shore	chr7:138793113-138794608	NA	NA
cg10310310	0.371522	0.717943	18.287	3.92545e-30	6.75281e-28	58.2085	0.532182	0.903704	0.371522	7	157367150	R	II	PTPRN2	Body	shore	Body-shore	chr7:157369120-157369394	NA	NA			rs56324039
cg19591623	-0.192569	0.836201	-18.2859	3.94059e-30	6.77595e-28	58.2047	0.932486	0.739917	-0.192569	19	311981	R	I	MIER2	Body	island	Body-island	chr19:311948-312224	NA	NA
cg20465661	0.421593	0.598698	18.2854	3.94686e-30	6.78099e-28	58.2031	0.387901	0.809494	0.421593	1	248551409	R	II	OR2T6	1stExon	opensea	1stExon-opensea		NA	NA
cg20725239	0.358793	0.662701	18.2854	3.94689e-30	6.78099e-28	58.2031	0.483305	0.842098	0.358793	11	124805963	R	II	HEPACAM	5'UTR	opensea	5'UTR-opensea		NA	NA	low-CpG:124311077-124311574
cg15794859	-0.306043	0.386466	-18.2852	3.94994e-30	6.78333e-28	58.2023	0.539488	0.233445	-0.306043	6	134214134	F	I	TCF21	3'UTR	island	3'UTR-island	chr6:134213959-134214351	NA	NA
cg06208270	-0.286591	0.660564	-18.2842	3.96365e-30	6.80397e-28	58.1989	0.80386	0.517269	-0.286591	1	156046344	R	II	MEX3A	3'UTR	island	3'UTR-island	chr1:156046343-156047384	TRUE	NA			rs61813323
cg19592637	-0.31799	0.609828	-18.2839	3.96791e-30	6.80838e-28	58.1978	0.768823	0.450833	-0.31799	20	25063052	F	I	VSX1	TSS1500	shore	TSS1500-shore	chr20:25063838-25065525	TRUE	NA
cg13941682	-0.218914	0.784456	-18.2832	3.97773e-30	6.82231e-28	58.1954	0.893913	0.674999	-0.218914	4	702545	R	II	PCGF3	5'UTR	shelf	5'UTR-shelf	chr4:698302-698692	NA	NA
cg20646491	0.411607	0.704899	18.2803	4.01843e-30	6.88332e-28	58.1852	0.499096	0.910703	0.411607	5	36608769	F	II	SLC1A3	Body	opensea	Body-opensea		NA	TRUE
cg05597836	-0.399332	0.53356	-18.2774	4.05906e-30	6.947e-28	58.1752	0.733226	0.333894	-0.399332	7	96655566	F	II	DLX5	TSS1500	shore	TSS1500-shore	chr7:96653467-96654199	NA	TRUE		rs73404547
cg00866814	0.110354	0.129097	18.2758	4.08269e-30	6.98447e-28	58.1694	0.0739196	0.184274	0.110354	19	49017364	F	II	LMTK3	TSS1500	shore	TSS1500-shore	chr19:49016737-49017207	NA	NA
cg19780352	-0.265259	0.301707	-18.2725	4.13016e-30	7.05968e-28	58.1578	0.434337	0.169077	-0.265259	4	169798931	R	I	PALLD	5'UTR	shore	5'UTR-shore	chr4:169799086-169799625	TRUE	NA
cg14562054	0.411508	0.491616	18.2714	4.14647e-30	7.08455e-28	58.1539	0.285862	0.69737	0.411508	11	66104485	F	II	RIN1	TSS1500	shelf	TSS1500-shelf	chr11:66102024-66102279	NA	NA
cg06569229	0.417034	0.58223	18.2705	4.15971e-30	7.09814e-28	58.1507	0.373713	0.790747	0.417034	11	92601301	R	I	FAT3	Body	shore	Body-shore	chr11:92599941-92600345	NA	NA
cg03882071	0.339375	0.650206	18.2701	4.16464e-30	7.10353e-28	58.1496	0.480518	0.819893	0.339375	17	43922210	R	II	LOC100128977	Body	opensea	Body-opensea		NA	NA
cg14248715	-0.450932	0.288847	-18.2692	4.17858e-30	7.12429e-28	58.1462	0.514313	0.0633817	-0.450932	14	57284096	R	I	OTX2OS1	Body	island	Body-island	chr14:57283967-57284558	NA	NA
cg26831119	-0.437125	0.372861	-18.2655	4.23283e-30	7.21067e-28	58.1334	0.591423	0.154298	-0.437125	4	111550830	R	I	PITX2	Body	shore	Body-shore	chr4:111549879-111550203	NA	NA
cg00812557	-0.317614	0.458491	-18.2613	4.29576e-30	7.31168e-28	58.1186	0.617298	0.299684	-0.317614	4	38073835	F	II	TBC1D1	Body	opensea	Body-opensea		NA	TRUE		rs34010692
cg19846622	-0.210252	0.610139	-18.261	4.30074e-30	7.31706e-28	58.1175	0.715265	0.505013	-0.210252	4	4859960	R	II	MSX1	TSS1500	island	TSS1500-island	chr4:4859632-4860191	NA	NA
cg08861449	0.280961	0.747413	18.257	4.36145e-30	7.41378e-28	58.1035	0.606932	0.887894	0.280961	1	33985111	F	II	CSMD2	3'UTR	opensea	3'UTR-opensea		NA	NA
cg04037905	-0.310015	0.726288	-18.2569	4.36312e-30	7.41378e-28	58.1031	0.881295	0.571281	-0.310015	10	97047067	R	II	PDLIM1	Body	shelf	Body-shelf	chr10:97050185-97051124	NA	NA
cg00907288	-0.512666	0.408662	-18.2522	4.43491e-30	7.53259e-28	58.0868	0.664995	0.15233	-0.512666	3	9178249	F	I	SRGAP3	Body	shore	Body-shore	chr3:9177691-9178189	NA	TRUE
cg18139800	-0.209723	0.785788	-18.2472	4.51412e-30	7.66066e-28	58.0692	0.890649	0.680926	-0.209723	6	32151517	F	II	AGER	Body	opensea	Body-opensea		NA	NA		rs2555465
cg12256469	0.397244	0.607896	18.2469	4.51844e-30	7.66476e-28	58.0682	0.409274	0.806518	0.397244	7	158376838	F	II	PTPRN2	Body	shelf	Body-shelf	chr7:158379328-158381221	NA	NA			rs74943110
cg17583957	0.4181	0.69003	18.2456	4.53944e-30	7.69714e-28	58.0636	0.48098	0.89908	0.4181	17	67536299	R	II	MAP2K6	Body	opensea	Body-opensea		NA	TRUE
cg11671363	-0.298342	0.649095	-18.2441	4.56282e-30	7.73353e-28	58.0585	0.798266	0.499924	-0.298342	5	148810177	F	I	MIR145	TSS200	opensea	TSS200-opensea		TRUE	TRUE
cg15642666	0.374753	0.583362	18.2439	4.56619e-30	7.73597e-28	58.0577	0.395986	0.770739	0.374753	19	34174388	R	II	CHST8	5'UTR	shore	5'UTR-shore	chr19:34175344-34175768	NA	NA
cg22778788	-0.268185	0.561021	-18.2419	4.59913e-30	7.7885e-28	58.0506	0.695114	0.426929	-0.268185	10	101294300	R	II	NKX2-3	Body	shore	Body-shore	chr10:101294443-101297263	NA	NA
cg20309677	-0.21494	0.84235	-18.238	4.66226e-30	7.88545e-28	58.037	0.94982	0.73488	-0.21494	1	116925753	F	II	ATP1A1	TSS1500	opensea	TSS1500-opensea		NA	NA
cg24913868	-0.387826	0.381901	-18.2372	4.67434e-30	7.90257e-28	58.0344	0.575814	0.187988	-0.387826	10	101296069	R	I	NKX2-3	3'UTR	island	3'UTR-island	chr10:101294443-101297263	NA	TRUE
cg10100887	0.42592	0.619015	18.2344	4.72108e-30	7.97488e-28	58.0245	0.406055	0.831975	0.42592	20	56273259	F	II	PMEPA1	5'UTR	opensea	5'UTR-opensea		TRUE	TRUE
cg04098763	-0.197912	0.803235	-18.2328	4.74847e-30	8.01778e-28	58.0187	0.902191	0.704278	-0.197912	17	80076338	R	I	CCDC57	Body	opensea	Body-opensea		NA	TRUE			rs74557461
cg09169953	-0.410654	0.298998	-18.2326	4.75184e-30	8.02011e-28	58.018	0.504325	0.0936707	-0.410654	4	111555102	F	II	PITX2	5'UTR	island	5'UTR-island	chr4:111554965-111555504	NA	NA
cg17610800	-0.376944	0.524028	-18.2306	4.78544e-30	8.07342e-28	58.011	0.7125	0.335556	-0.376944	7	27281561	F	II	EVX1	TSS1500	shore	TSS1500-shore	chr7:27282086-27283136	NA	NA
cg16876790	-0.451146	0.331067	-18.23	4.79509e-30	8.08632e-28	58.0089	0.55664	0.105494	-0.451146	7	96654786	F	II	DLX5	TSS1500	shore	TSS1500-shore	chr7:96653467-96654199	NA	NA
cg20770516	-0.170863	0.788428	-18.2289	4.81397e-30	8.11475e-28	58.005	0.873859	0.702996	-0.170863	7	104681396	R	II	MLL5	5'UTR	opensea	5'UTR-opensea		NA	NA	low-CpG:104468614-104468687
cg23461824	0.364458	0.683065	18.2265	4.85479e-30	8.1733e-28	57.9966	0.500836	0.865294	0.364458	7	134605363	R	II	CALD1	Body	opensea	Body-opensea		NA	TRUE
cg08884571	-0.476433	0.378541	-18.2229	4.91655e-30	8.2669e-28	57.984	0.616758	0.140325	-0.476433	19	45901453	F	I	PPP1R13L	Body	island	Body-island	chr19:45901452-45901688	TRUE	NA
cg16576213	0.351567	0.63091	18.2227	4.91911e-30	8.26774e-28	57.9835	0.455126	0.806693	0.351567	2	80101401	R	I	CTNNA2	Body	opensea	Body-opensea		NA	NA
cg23172086	0.387088	0.623356	18.2219	4.93407e-30	8.28942e-28	57.9804	0.429812	0.8169	0.387088	10	98129751	R	I	TLL2	Body	opensea	Body-opensea		NA	NA
cg21367256	0.380289	0.67292	18.2203	4.9609e-30	8.33102e-28	57.975	0.482776	0.863064	0.380289	20	62795658	F	II	MYT1	TSS200	opensea	TSS200-opensea		NA	NA
cg21862081	0.40215	0.635699	18.2194	4.97755e-30	8.35345e-28	57.9717	0.434624	0.836774	0.40215	14	77769687	R	II	POMT2	Body	opensea	Body-opensea		NA	TRUE
cg24515861	0.311475	0.612475	18.2192	4.97978e-30	8.35345e-28	57.9712	0.456738	0.768213	0.311475	17	43922122	F	II	LOC100128977	Body	opensea	Body-opensea		NA	NA
cg00917251	0.188995	0.168733	18.2191	4.98194e-30	8.35345e-28	57.9708	0.0742358	0.26323	0.188995	1	24829987	R	II	RCAN3	5'UTR	shore	5'UTR-shore	chr1:24828865-24829878	NA	NA
cg17004653	0.347151	0.354237	18.2191	4.98256e-30	8.35345e-28	57.9707	0.180662	0.527813	0.347151	10	132925393	F	II	TCERG1L	Body	opensea	Body-opensea		NA	TRUE		rs34301136
cg07157107	0.390499	0.418903	18.2187	4.98917e-30	8.36104e-28	57.9694	0.223653	0.614153	0.390499	8	42623730	F	II	CHRNA6	TSS200	opensea	TSS200-opensea		NA	NA
cg12229082	0.303075	0.56966	18.2149	5.05684e-30	8.46036e-28	57.9559	0.418123	0.721198	0.303075	7	150721650	R	II	ATG9B	TSS200	shelf	TSS200-shelf	chr7:150725173-150726018	NA	NA
cg17273588	0.377439	0.502596	18.2117	5.11349e-30	8.55158e-28	57.9448	0.313877	0.691315	0.377439	2	100760351	R	II	AFF3	TSS1500	opensea	TSS1500-opensea		NA	NA
cg07700393	0.438625	0.606188	18.2076	5.18733e-30	8.67147e-28	57.9305	0.386875	0.8255	0.438625	5	33788976	R	II	ADAMTS12	Body	opensea	Body-opensea		TRUE	TRUE
cg00087368	-0.401665	0.463475	-18.2068	5.20268e-30	8.69351e-28	57.9276	0.664308	0.262643	-0.401665	6	100896392	R	II	SIM1	Body	shore	Body-shore	chr6:100897080-100897621	NA	TRUE
cg11597131	-0.480656	0.334614	-18.2061	5.21578e-30	8.71178e-28	57.9251	0.574942	0.0942863	-0.480656	2	176988939	R	I	HOXD9	3'UTR	shore	3'UTR-shore	chr2:176989337-176989587	NA	NA
cg16205058	0.189064	0.181813	18.2059	5.21845e-30	8.71262e-28	57.9246	0.0872812	0.276345	0.189064	14	20924369	R	II	APEX1	Body	shore	Body-shore	chr14:20922740-20924023	NA	NA
cg08684361	0.225415	0.196572	18.1978	5.3699e-30	8.95063e-28	57.896	0.0838648	0.30928	0.225415	6	30852823	F	II	DDR1	5'UTR	shore	5'UTR-shore	chr6:30852102-30852676	NA	NA
cg26612727	-0.283602	0.65991	-18.197	5.38517e-30	8.97235e-28	57.8932	0.801711	0.518109	-0.283602	17	38024636	F	II	ZPBP2	1stExon	island	1stExon-island	chr17:38024145-38024637	NA	NA
cg14640592	-0.388457	0.522504	-18.1961	5.40161e-30	8.99604e-28	57.8901	0.716733	0.328276	-0.388457	1	203044726	R	II	PPFIA4	Body	island	Body-island	chr1:203044722-203045390	NA	TRUE
cg14933439	0.368535	0.645037	18.1957	5.40933e-30	9.00515e-28	57.8887	0.460769	0.829305	0.368535	16	49407794	R	II	C16orf78	TSS200	opensea	TSS200-opensea		NA	NA
cg10828316	0.343368	0.681695	18.1906	5.50658e-30	9.15569e-28	57.8709	0.510011	0.853378	0.343368	14	78869352	R	II	NRXN3	TSS1500	opensea	TSS1500-opensea		NA	NA
cg27405731	-0.305935	0.639268	-18.1893	5.53257e-30	9.1951e-28	57.8662	0.792235	0.4863	-0.305935	7	101571203	F	I	CUX1	Body	opensea	Body-opensea		NA	NA
cg16659510	-0.139378	0.868462	-18.1849	5.6197e-30	9.32836e-28	57.8507	0.938151	0.798773	-0.139378	16	87996870	F	I	BANP	5'UTR	opensea	5'UTR-opensea		TRUE	NA
cg06277657	-0.458412	0.434974	-18.1843	5.63112e-30	9.34346e-28	57.8486	0.664179	0.205768	-0.458412	7	137532374	F	II	DGKI	TSS1500	island	TSS1500-island	chr7:137531125-137532382	NA	NA			rs76807882
cg01722932	-0.177202	0.503569	-18.182	5.67746e-30	9.41647e-28	57.8405	0.59217	0.414968	-0.177202	11	92702653	R	I	MTNR1B	TSS200	shore	TSS200-shore	chr11:92702789-92703434	NA	TRUE
cg11069071	0.374496	0.54079	18.1808	5.70101e-30	9.45163e-28	57.8363	0.353542	0.728038	0.374496	14	101525465	R	II	MIR496	TSS1500	opensea	TSS1500-opensea		NA	NA
cg26110281	0.392746	0.681459	18.1805	5.70613e-30	9.45622e-28	57.8354	0.485086	0.877831	0.392746	11	123885695	F	II	OR10G4	TSS1500	opensea	TSS1500-opensea		NA	NA
cg04863713	0.0987224	0.0946777	18.1789	5.73941e-30	9.50746e-28	57.8296	0.0453165	0.144039	0.0987224	1	150521201	R	II	ADAMTSL4	TSS1500	shore	TSS1500-shore	chr1:150521349-150522368	NA	NA
cg21463349	-0.312181	0.185342	-18.1768	5.7821e-30	9.57423e-28	57.8222	0.341433	0.029252	-0.312181	2	119600948	R	I	EN1	Body	island	Body-island	chr2:119599458-119600966	NA	TRUE
cg11122009	-0.353819	0.50221	-18.1765	5.78695e-30	9.57831e-28	57.8214	0.67912	0.3253	-0.353819	17	63554536	R	I	AXIN2	Body	shore	Body-shore	chr17:63555902-63557362	NA	NA
cg19583967	0.16147	0.224015	18.176	5.79746e-30	9.59177e-28	57.8196	0.14328	0.30475	0.16147	14	64805944	F	II	ESR2	TSS1500	shore	TSS1500-shore	chr14:64805109-64805785	NA	NA
cg01596963	-0.285384	0.605219	-18.1747	5.8239e-30	9.63156e-28	57.8151	0.747911	0.462527	-0.285384	11	62455830	R	II	LRRN4CL	Body	island	Body-island	chr11:62455073-62455868	NA	NA
cg10982443	-0.29053	0.690118	-18.169	5.94213e-30	9.81499e-28	57.795	0.835383	0.544853	-0.29053	14	20903611	F	I	KLHL33	5'UTR	island	5'UTR-island	chr14:20903395-20903720	NA	TRUE
cg10216717	0.433453	0.660043	18.1687	5.94814e-30	9.82087e-28	57.794	0.443317	0.87677	0.433453	12	128899290	R	II	TMEM132C	Body	shore	Body-shore	chr12:128899813-128900065	NA	NA
cg22732253	-0.251086	0.613943	-18.1653	6.01997e-30	9.93539e-28	57.782	0.739486	0.4884	-0.251086	2	63280164	R	II	OTX1	Body	shore	Body-shore	chr2:63281034-63281347	NA	NA
cg00466334	-0.247348	0.656293	-18.1638	6.05255e-30	9.98507e-28	57.7766	0.779967	0.532619	-0.247348	1	119532850	F	II	TBX15	TSS1500	shore	TSS1500-shore	chr1:119531991-119532196	NA	NA
cg05936441	-0.375333	0.330876	-18.1633	6.06317e-30	9.99439e-28	57.7749	0.518542	0.143209	-0.375333	20	37356844	F	II	SLC32A1	Body	island	Body-island	chr20:37352130-37357372	NA	NA
cg03676298	-0.15331	0.867788	-18.1619	6.09357e-30	1.00404e-27	57.7699	0.944444	0.791133	-0.15331	3	48078103	R	II	MAP4	5'UTR	opensea	5'UTR-opensea		NA	TRUE
cg13035743	-0.53681	0.540512	-18.1591	6.15345e-30	1.01349e-27	57.7601	0.808917	0.272107	-0.53681	6	32119685	R	II	PRRT1	1stExon	shore	1stExon-shore	chr6:32118101-32118544	NA	TRUE	high-CpG:32227661-32227701
cg25437411	-0.417356	0.37801	-18.1536	6.27307e-30	1.0315e-27	57.7409	0.586687	0.169332	-0.417356	10	100996347	F	II	HPSE2	TSS1500	shelf	TSS1500-shelf	chr10:100992156-100992687	NA	NA
cg11493223	0.256761	0.23166	18.1527	6.29278e-30	1.03432e-27	57.7378	0.10328	0.36004	0.256761	17	76128522	F	I	TMC8	Body	shore	Body-shore	chr17:76127521-76128406	NA	NA			rs61755873
cg04236178	-0.328795	0.567496	-18.1479	6.40022e-30	1.05155e-27	57.7209	0.731893	0.403099	-0.328795	1	217310572	R	II	ESRRG	5'UTR	shore	5'UTR-shore	chr1:217310749-217311178	TRUE	NA
cg14066757	0.286341	0.364994	18.1473	6.41381e-30	1.05335e-27	57.7188	0.221824	0.508165	0.286341	19	44285568	R	II	KCNN4	TSS200	opensea	TSS200-opensea		TRUE	NA
cg04834502	0.191999	0.139573	18.1446	6.475e-30	1.06297e-27	57.7093	0.0435742	0.235573	0.191999	16	48644360	F	II	N4BP1	TSS1500	shore	TSS1500-shore	chr16:48643589-48643860	NA	NA
cg06544316	0.124878	0.132605	18.1437	6.49565e-30	1.06593e-27	57.7062	0.0701656	0.195044	0.124878	11	93394605	F	II	KIAA1731	TSS1500	shore	TSS1500-shore	chr11:93394678-93395273	NA	NA
cg07927072	-0.245708	0.688125	-18.1412	6.55462e-30	1.07516e-27	57.6971	0.810979	0.565271	-0.245708	2	28117087	F	II	BRE	5'UTR	shelf	5'UTR-shelf	chr2:28113060-28113764	NA	NA
cg03025825	-0.224622	0.792627	-18.1405	6.5702e-30	1.07728e-27	57.6948	0.904938	0.680316	-0.224622	17	1975245	R	II	SMG6	Body	opensea	Body-opensea		NA	NA
cg08774902	-0.341433	0.704257	-18.1401	6.57879e-30	1.07781e-27	57.6935	0.874974	0.533541	-0.341433	8	30375536	F	II	RBPMS	Body	opensea	Body-opensea		NA	TRUE
cg16701059	-0.314191	0.234633	-18.1396	6.59137e-30	1.07943e-27	57.6916	0.391729	0.0775377	-0.314191	15	101513798	R	I	LRRK1	Body	island	Body-island	chr15:101513245-101514323	NA	NA
cg07584855	-0.270256	0.748625	-18.1359	6.6784e-30	1.09279e-27	57.6785	0.883753	0.613497	-0.270256	1	221055545	F	I	HLX	Body	island	Body-island	chr1:221055492-221055800	NA	NA
cg19730379	-0.424415	0.499392	-18.1344	6.71209e-30	1.09786e-27	57.6735	0.7116	0.287184	-0.424415	10	104542002	F	II	C10orf26	Body	opensea	Body-opensea		NA	TRUE
cg16081499	0.33394	0.774152	18.1323	6.76273e-30	1.10569e-27	57.666	0.607182	0.941123	0.33394	12	129000862	F	II	TMEM132C	Body	opensea	Body-opensea		NA	NA			rs73159885
cg10528989	0.425049	0.619903	18.1315	6.78278e-30	1.10852e-27	57.663	0.407378	0.832428	0.425049	14	96722306	F	II	BDKRB1	TSS1500	opensea	TSS1500-opensea		NA	NA
cg03632704	-0.436232	0.428906	-18.1293	6.83397e-30	1.11582e-27	57.6555	0.647022	0.21079	-0.436232	5	87973439	R	II	LOC645323	Body	shore	Body-shore	chr5:87973951-87974294	NA	NA
cg25009498	-0.40618	0.468118	-18.1292	6.83575e-30	1.11582e-27	57.6552	0.671207	0.265028	-0.40618	17	80562120	F	I	FOXK2	3'UTR	shelf	3'UTR-shelf	chr17:80559025-80559450	NA	NA
cg19411025	-0.383567	0.366212	-18.1275	6.87716e-30	1.12212e-27	57.6492	0.557996	0.174429	-0.383567	5	87968118	R	II	LOC645323	Body	shore	Body-shore	chr5:87968635-87968907	NA	NA
cg03308120	0.355354	0.522185	18.1241	6.95979e-30	1.13377e-27	57.6373	0.344507	0.699862	0.355354	7	157933784	F	II	PTPRN2	Body	shelf	Body-shelf	chr7:157937614-157937841	NA	NA
cg15067015	0.383064	0.517963	18.1234	6.97755e-30	1.1362e-27	57.6348	0.326431	0.709495	0.383064	1	175671657	F	II	TNR	5'UTR	opensea	5'UTR-opensea		NA	TRUE		rs35241534
cg03019112	0.377848	0.711022	18.1206	7.04703e-30	1.14705e-27	57.6249	0.522097	0.899946	0.377848	14	101518520	R	II	MIR487A	TSS1500	opensea	TSS1500-opensea		NA	NA
cg01492523	-0.334704	0.610674	-18.119	7.08642e-30	1.1516e-27	57.6193	0.778026	0.443321	-0.334704	4	155413789	R	II	DCHS2	TSS1500	shore	TSS1500-shore	chr4:155410623-155413393	NA	NA
cg03181248	-0.423374	0.295727	-18.1189	7.08951e-30	1.15163e-27	57.6189	0.507414	0.0840401	-0.423374	2	175199670	R	I	SP9	TSS200	island	TSS200-island	chr2:175199463-175202639	NA	NA	high-CpG:174907883-174907950
cg16419009	-0.438713	0.465024	-18.1165	7.14981e-30	1.16096e-27	57.6104	0.68438	0.245667	-0.438713	2	119600586	R	II	EN1	Body	island	Body-island	chr2:119599458-119600966	NA	NA			rs72955069
cg19247475	-0.229147	0.710624	-18.114	7.21324e-30	1.17079e-27	57.6016	0.825197	0.59605	-0.229147	5	140789745	F	II	PCDHGA4	Body	island	Body-island	chr5:140789094-140789762	NA	NA
cg27213509	-0.318735	0.444742	-18.1135	7.22501e-30	1.17223e-27	57.6	0.60411	0.285375	-0.318735	2	176947228	R	II	EVX2	Body	island	Body-island	chr2:176944087-176948446	NA	NA
cg03952361	0.31276	0.714337	18.1121	7.26295e-30	1.17743e-27	57.5948	0.557957	0.870716	0.31276	12	132870378	R	I	GALNT9	Body	shore	Body-shore	chr12:132872343-132872586	NA	NA
cg11732673	-0.286062	0.781993	-18.1049	7.44919e-30	1.20665e-27	57.5695	0.925024	0.638962	-0.286062	3	99782793	R	II	C3orf26	Body	opensea	Body-opensea		NA	TRUE
cg26340149	0.208582	0.234997	18.1032	7.49292e-30	1.21325e-27	57.5637	0.130706	0.339288	0.208582	11	69988497	F	I	ANO1	Body	opensea	Body-opensea		NA	TRUE
cg22061831	-0.446682	0.268645	-18.1028	7.50518e-30	1.21474e-27	57.562	0.491986	0.0453037	-0.446682	2	131721692	R	I	ARHGEF4	Body	island	Body-island	chr2:131720819-131721867	TRUE	NA
cg25610428	0.293041	0.405397	18.0965	7.67177e-30	1.23971e-27	57.5401	0.258877	0.551918	0.293041	1	152758453	F	II	LCE1E	TSS1500	opensea	TSS1500-opensea		NA	NA
cg14673618	-0.32838	0.457973	-18.0964	7.6762e-30	1.23993e-27	57.5396	0.622163	0.293783	-0.32838	2	45170322	F	I	SIX3	Body	island	Body-island	chr2:45169505-45171884	NA	NA
cg11126767	-0.343588	0.564678	-18.093	7.76747e-30	1.25367e-27	57.5278	0.736472	0.392884	-0.343588	14	60978275	R	II	SIX6	3'UTR	shore	3'UTR-shore	chr14:60975732-60978180	NA	NA
cg10533746	-0.208728	0.770346	-18.0924	7.78365e-30	1.25577e-27	57.5257	0.87471	0.665982	-0.208728	2	74645626	R	I	C2orf81	TSS1500	island	TSS1500-island	chr2:74645467-74645750	NA	NA
cg20539142	0.420199	0.562731	18.0914	7.81184e-30	1.25982e-27	57.5221	0.352632	0.772831	0.420199	8	42623718	F	II	CHRNA6	TSS200	opensea	TSS200-opensea		NA	NA			rs34444353
cg12141030	0.235856	0.273886	18.0849	7.99342e-30	1.28652e-27	57.4992	0.155957	0.391814	0.235856	3	44803447	R	II	KIAA1143	TSS1500	island	TSS1500-island	chr3:44802852-44803618	NA	NA
cg13753460	0.300903	0.614602	18.0828	8.05178e-30	1.29488e-27	57.4919	0.464151	0.765054	0.300903	14	101520989	F	II	MIR134	TSS200	opensea	TSS200-opensea		NA	NA
cg26687072	-0.297614	0.758778	-18.0814	8.09443e-30	1.30122e-27	57.4866	0.907586	0.609971	-0.297614	17	46608345	R	II	HOXB1	TSS200	island	TSS200-island	chr17:46607804-46608390	NA	TRUE
cg26627956	-0.239054	0.788502	-18.0772	8.21415e-30	1.31994e-27	57.472	0.908029	0.668975	-0.239054	2	202004766	R	I	CFLAR	Body	opensea	Body-opensea		NA	NA
cg00746143	-0.218038	0.811925	-18.0762	8.24434e-30	1.32426e-27	57.4683	0.920944	0.702906	-0.218038	3	194959645	F	II	C3orf21	Body	opensea	Body-opensea		NA	TRUE
cg13398658	-0.286661	0.685878	-18.0738	8.31442e-30	1.33498e-27	57.4599	0.829208	0.542548	-0.286661	3	44981371	R	II	ZDHHC3	Body	opensea	Body-opensea		NA	TRUE
cg19709355	-0.302376	0.312537	-18.0712	8.38872e-30	1.34584e-27	57.451	0.463725	0.161349	-0.302376	17	38504102	F	I	RARA	Body	shelf	Body-shelf	chr17:38501396-38501839	NA	TRUE
cg06332842	0.390028	0.722833	18.0707	8.4038e-30	1.34772e-27	57.4492	0.527818	0.917847	0.390028	17	79100214	F	I	MIR657	TSS1500	shelf	TSS1500-shelf	chr17:79102748-79102970	NA	NA
cg22881174	-0.317927	0.550198	-18.07	8.42477e-30	1.35054e-27	57.4467	0.709161	0.391234	-0.317927	10	7449665	R	II	SFMBT2	5'UTR	island	5'UTR-island	chr10:7449376-7455339	NA	NA
cg13294849	-0.382183	0.632734	-18.068	8.48428e-30	1.35866e-27	57.4397	0.823825	0.441642	-0.382183	3	181441571	F	I	SOX2OT	Body	shelf	Body-shelf	chr3:181444409-181445000	NA	NA
cg09977703	-0.300324	0.386773	-18.068	8.48554e-30	1.35866e-27	57.4396	0.536934	0.236611	-0.300324	19	46854563	F	I	PPP5C	Body	shelf	Body-shelf	chr19:46850185-46850678	TRUE	NA
cg21768042	-0.160557	0.850392	-18.0669	8.51728e-30	1.3632e-27	57.4358	0.930671	0.770114	-0.160557	5	141059890	F	II	ARAP3	Body	opensea	Body-opensea		NA	NA
cg15176213	-0.26157	0.67609	-18.0661	8.54161e-30	1.36655e-27	57.433	0.806875	0.545306	-0.26157	19	36643572	F	II	COX7A1	5'UTR	island	5'UTR-island	chr19:36642327-36643585	TRUE	NA
cg08696165	-0.543935	0.429821	-18.0592	8.75437e-30	1.40003e-27	57.4085	0.701789	0.157853	-0.543935	2	45172169	F	II	SIX3	3'UTR	shore	3'UTR-shore	chr2:45169505-45171884	NA	NA
cg00651359	0.328461	0.563921	18.0587	8.76996e-30	1.40141e-27	57.4067	0.39969	0.728151	0.328461	7	132219281	R	I	PLXNA4	5'UTR	opensea	5'UTR-opensea		NA	TRUE
cg12496211	0.407766	0.500079	18.0569	8.82555e-30	1.40974e-27	57.4004	0.296196	0.703962	0.407766	12	2193060	F	II	CACNA1C	Body	opensea	Body-opensea		NA	TRUE
cg12801917	-0.290144	0.682845	-18.053	8.94634e-30	1.42846e-27	57.3868	0.827917	0.537772	-0.290144	17	15417503	R	II	FAM18B2	Body	opensea	Body-opensea		NA	TRUE
cg05634376	0.432415	0.694436	18.0524	8.96469e-30	1.43083e-27	57.3848	0.478229	0.910643	0.432415	11	66659993	F	II	PC	5'UTR	opensea	5'UTR-opensea		NA	TRUE
cg24704177	-0.463749	0.387044	-18.05	9.04345e-30	1.44151e-27	57.376	0.618918	0.155169	-0.463749	2	177027710	R	II	HOXD3	TSS1500	island	TSS1500-island	chr2:177027617-177028014	NA	NA
cg08234878	-0.354413	0.529972	-18.0499	9.04597e-30	1.44151e-27	57.3758	0.707178	0.352765	-0.354413	14	73737095	R	II	PAPLN	Body	opensea	Body-opensea		TRUE	TRUE
cg25783892	0.393204	0.730413	18.048	9.10525e-30	1.45038e-27	57.3693	0.53381	0.927015	0.393204	10	85898649	F	II	GHITM	TSS1500	shore	TSS1500-shore	chr10:85899058-85899640	NA	NA
cg07568841	0.465014	0.455615	18.0478	9.11412e-30	1.45122e-27	57.3683	0.223109	0.688122	0.465014	7	30362781	F	II	ZNRF2	Body	opensea	Body-opensea		NA	TRUE
cg04961235	-0.29262	0.466074	-18.0474	9.12754e-30	1.45278e-27	57.3668	0.612384	0.319764	-0.29262	7	4901628	F	I	PAPOLB	TSS200	island	TSS200-island	chr7:4901336-4901753	NA	NA
cg04315554	0.401788	0.634508	18.0449	9.20617e-30	1.46414e-27	57.3583	0.433614	0.835402	0.401788	2	115458559	F	II	DPP10	Body	opensea	Body-opensea		NA	TRUE
cg16751493	-0.36317	0.657345	-18.0412	9.32807e-30	1.48236e-27	57.3451	0.83893	0.47576	-0.36317	2	242101289	R	II	PPP1R7	Body	opensea	Body-opensea		TRUE	TRUE
cg26295681	0.278518	0.677906	18.0336	9.58385e-30	1.5212e-27	57.3181	0.538647	0.817165	0.278518	1	240370617	R	II	FMN2	Body	shore	Body-shore	chr1:240370859-240371526	NA	NA
cg07055879	0.367549	0.639656	18.0334	9.58775e-30	1.52122e-27	57.3177	0.455881	0.823431	0.367549	7	143747474	F	II	OR2A5	TSS200	opensea	TSS200-opensea		NA	NA		rs77440366	rs77823606
cg04891961	-0.216416	0.665271	-18.0332	9.59627e-30	1.52197e-27	57.3169	0.773479	0.557063	-0.216416	17	27939900	F	II	ANKRD13B	Body	island	Body-island	chr17:27939298-27940770	TRUE	NA
cg18583697	0.31468	0.740223	18.0294	9.72459e-30	1.5405e-27	57.3036	0.582883	0.897562	0.31468	8	35576222	F	II	UNC5D	Body	opensea	Body-opensea		NA	TRUE
cg24366429	0.336502	0.533029	18.0288	9.74739e-30	1.54351e-27	57.3013	0.364778	0.70128	0.336502	17	77207424	F	I	HRNBP3	5'UTR	opensea	5'UTR-opensea		NA	NA
cg13386070	0.353696	0.653246	18.0284	9.76205e-30	1.54522e-27	57.2998	0.476398	0.830094	0.353696	1	175046885	R	II	TNN	Body	shore	Body-shore	chr1:175048550-175048874	NA	NA
cg01065161	0.396461	0.747028	18.027	9.80832e-30	1.55132e-27	57.2951	0.548797	0.945258	0.396461	10	98130127	F	I	TLL2	Body	opensea	Body-opensea		NA	NA
cg11872672	0.351674	0.670175	18.0264	9.82977e-30	1.5541e-27	57.2929	0.494338	0.846012	0.351674	7	157514730	F	II	PTPRN2	Body	opensea	Body-opensea		NA	NA
cg22010052	-0.310939	0.366049	-18.0246	9.8919e-30	1.56331e-27	57.2866	0.521518	0.210579	-0.310939	5	115298704	F	I	LVRN	1stExon	island	1stExon-island	chr5:115298350-115299137	NA	NA
cg03030267	0.389058	0.543639	18.0234	9.93393e-30	1.56872e-27	57.2824	0.34911	0.738168	0.389058	20	57394000	R	II	GNASAS	Body	opensea	Body-opensea		TRUE	TRUE		rs77501163
cg02397552	-0.24498	0.726915	-18.0224	9.96876e-30	1.57361e-27	57.2789	0.849405	0.604425	-0.24498	13	77576078	F	II	CLN5	3'UTR	opensea	3'UTR-opensea		NA	NA
cg16920238	-0.24851	0.778298	-18.0201	1.00501e-29	1.58519e-27	57.2708	0.902553	0.654043	-0.24851	17	80076378	R	I	CCDC57	Body	opensea	Body-opensea		NA	TRUE
cg19022006	0.503792	0.591337	18.0192	1.00826e-29	1.5897e-27	57.2675	0.339441	0.843233	0.503792	18	61143945	R	I	SERPINB5	TSS200	opensea	TSS200-opensea		NA	NA			rs57171297
cg14413466	-0.149732	0.794646	-18.0152	1.02256e-29	1.61161e-27	57.2535	0.869511	0.71978	-0.149732	17	79170920	F	I	AZI1	Body	opensea	Body-opensea		NA	NA		rs34721851
cg27217253	0.376334	0.562066	18.0109	1.03843e-29	1.6347e-27	57.2381	0.373899	0.750233	0.376334	17	8648562	R	I	CCDC42	TSS1500	shore	TSS1500-shore	chr17:8649003-8649513	NA	NA
cg09388140	-0.521738	0.474855	-18.0097	1.0428e-29	1.64094e-27	57.2339	0.735724	0.213986	-0.521738	7	96641477	R	II	DLX6AS	Body	opensea	Body-opensea		NA	NA
cg02447239	0.286268	0.539362	18.0088	1.0462e-29	1.64437e-27	57.2307	0.396228	0.682496	0.286268	2	235936137	F	I	SH3BP4	5'UTR	opensea	5'UTR-opensea		TRUE	NA		rs55705244
cg02627286	-0.212466	0.840442	-18.0078	1.04971e-29	1.64859e-27	57.2273	0.946675	0.734209	-0.212466	16	89590583	R	I	SPG7	Body	shore	Body-shore	chr16:89588816-89589058	NA	NA
cg19998432	0.279709	0.464084	18.0074	1.05144e-29	1.65067e-27	57.2257	0.324229	0.603938	0.279709	9	125391618	R	II	OR1B1	1stExon	opensea	1stExon-opensea		NA	NA
cg11862144	0.494545	0.610443	18.0067	1.054e-29	1.65404e-27	57.2233	0.363171	0.857715	0.494545	18	61143961	R	I	SERPINB5	TSS200	opensea	TSS200-opensea		NA	NA
cg20157753	0.344592	0.307719	18.0049	1.06084e-29	1.66412e-27	57.2168	0.135423	0.480016	0.344592	2	113594343	R	II	IL1B	1stExon	opensea	1stExon-opensea		NA	NA			rs1133555
cg11590974	0.401076	0.700515	18.0046	1.06173e-29	1.66487e-27	57.216	0.499976	0.901053	0.401076	5	41142881	F	II	C6	3'UTR	opensea	3'UTR-opensea		NA	NA
cg10166277	-0.283809	0.64755	-18.0028	1.06879e-29	1.67489e-27	57.2094	0.789454	0.505646	-0.283809	7	104752828	R	II	MLL5	Body	opensea	Body-opensea		NA	TRUE
cg02994246	-0.226364	0.748259	-18.0027	1.06895e-29	1.67489e-27	57.2092	0.861441	0.635077	-0.226364	1	21587174	R	I	ECE1	Body	opensea	Body-opensea		NA	NA
cg19722748	-0.517774	0.483809	-18.0006	1.07714e-29	1.68707e-27	57.2016	0.742696	0.224922	-0.517774	7	96627700	R	II	DLX6AS	Body	shelf	Body-shelf	chr7:96631383-96631800	NA	NA
cg02322373	-0.366336	0.374465	-18.0002	1.07851e-29	1.68855e-27	57.2003	0.557633	0.191297	-0.366336	2	71134524	F	II	VAX2	Body	shore	Body-shore	chr2:71134585-71134792	NA	NA
cg19102771	-0.489049	0.33694	-17.9993	1.08206e-29	1.69346e-27	57.1971	0.581465	0.0924152	-0.489049	2	223166909	R	II	CCDC140	5'UTR	shore	5'UTR-shore	chr2:223167205-223167560	NA	NA
cg17640485	-0.399447	0.509646	-17.9961	1.09427e-29	1.71124e-27	57.1859	0.709369	0.309923	-0.399447	3	195620147	R	I	TNK2	Body	shelf	Body-shelf	chr3:195622187-195623033	TRUE	TRUE
cg16288089	-0.471983	0.322672	-17.995	1.09867e-29	1.71678e-27	57.1819	0.558664	0.086681	-0.471983	7	97361408	R	I	TAC1	5'UTR	island	5'UTR-island	chr7:97361132-97363018	NA	NA
cg01440489	0.368824	0.353594	17.9946	1.10017e-29	1.71846e-27	57.1805	0.169181	0.538006	0.368824	13	41593385	R	II	ELF1	5'UTR	opensea	5'UTR-opensea		NA	NA
cg11729679	-0.370639	0.435021	-17.9933	1.1053e-29	1.72579e-27	57.1759	0.62034	0.249701	-0.370639	2	111877065	R	II	BCL2L11	TSS1500	island	TSS1500-island	chr2:111875206-111880965	NA	NA
cg24389585	-0.279026	0.749431	-17.9906	1.11587e-29	1.74163e-27	57.1664	0.888944	0.609918	-0.279026	7	27184125	F	II	HOXA5	TSS1500	island	TSS1500-island	chr7:27182613-27185562	NA	NA
cg06881695	-0.390275	0.382544	-17.9902	1.11732e-29	1.74287e-27	57.1651	0.577681	0.187406	-0.390275	6	30168773	F	II	TRIM26	5'UTR	opensea	5'UTR-opensea		NA	NA
cg06203976	0.369839	0.699364	17.9902	1.11753e-29	1.74287e-27	57.1649	0.514444	0.884283	0.369839	1	159140445	F	II	CADM3	TSS1500	shore	TSS1500-shore	chr1:159141202-159141718	NA	NA
cg13209441	-0.501434	0.439506	-17.9871	1.12969e-29	1.76114e-27	57.1541	0.690223	0.188789	-0.501434	7	96626151	R	II	DLX6AS	Body	opensea	Body-opensea		NA	NA
cg14666310	0.290814	0.598722	17.9843	1.14116e-29	1.77834e-27	57.144	0.453315	0.744129	0.290814	19	42211479	F	II	CEACAM5	TSS1500	opensea	TSS1500-opensea		NA	NA		rs73932029
cg03031672	0.350127	0.633252	17.9835	1.14417e-29	1.78165e-27	57.1414	0.458189	0.808316	0.350127	20	60450178	R	II	CDH4	Body	shore	Body-shore	chr20:60448775-60449063	TRUE	NA
cg16579438	0.202357	0.255424	17.9824	1.14884e-29	1.78823e-27	57.1373	0.154246	0.356602	0.202357	3	24537301	R	I	THRB	TSS1500	island	TSS1500-island	chr3:24535844-24537436	TRUE	NA
cg23922739	-0.313251	0.255854	-17.9798	1.15936e-29	1.80391e-27	57.1282	0.41248	0.0992283	-0.313251	12	54338743	R	I	HOXC13	Body	shore	Body-shore	chr12:54338761-54339168	NA	NA
cg12417775	-0.383389	0.650587	-17.979	1.16248e-29	1.80807e-27	57.1255	0.842282	0.458893	-0.383389	1	212463238	F	II	PPP2R5A	Body	shelf	Body-shelf	chr1:212457967-212459694	NA	NA
cg22261669	-0.37396	0.629795	-17.9788	1.16345e-29	1.80888e-27	57.1247	0.816775	0.442815	-0.37396	13	98959799	R	I	FARP1	Body	opensea	Body-opensea		NA	NA
cg23497644	0.330837	0.488716	17.9774	1.16913e-29	1.817e-27	57.1198	0.323298	0.654135	0.330837	2	170654835	F	II	SSB	TSS1500	shore	TSS1500-shore	chr2:170655289-170655757	NA	NA			rs80146363
cg03343128	0.373227	0.540248	17.9701	1.19979e-29	1.86106e-27	57.094	0.353635	0.726862	0.373227	1	247712140	F	II	C1orf150	TSS1500	opensea	TSS1500-opensea		NA	NA
cg07039560	-0.264975	0.594106	-17.9698	1.20137e-29	1.86279e-27	57.0927	0.726594	0.461619	-0.264975	5	140683681	F	I	SLC25A2	TSS200	island	TSS200-island	chr5:140683195-140683773	NA	NA
cg10805039	-0.514911	0.422802	-17.9689	1.20515e-29	1.86793e-27	57.0896	0.680257	0.165347	-0.514911	17	750241	F	II	NXN	Body	opensea	Body-opensea		NA	NA
cg18568589	-0.355872	0.544993	-17.9675	1.21092e-29	1.87616e-27	57.0848	0.722929	0.367058	-0.355872	19	9609395	R	II	ZNF560	TSS200	shore	TSS200-shore	chr19:9608804-9609343	NA	NA
cg19002941	-0.227039	0.720389	-17.9648	1.2228e-29	1.89309e-27	57.0751	0.833908	0.60687	-0.227039	8	641497	F	I	ERICH1	Body	shelf	Body-shelf	chr8:637393-638251	NA	NA
cg25044651	-0.385806	0.42893	-17.9645	1.22379e-29	1.89391e-27	57.0743	0.621833	0.236027	-0.385806	5	115298720	F	II	LVRN	1stExon	island	1stExon-island	chr5:115298350-115299137	NA	NA
cg20597215	0.351739	0.742111	17.9626	1.23234e-29	1.9064e-27	57.0673	0.566241	0.91798	0.351739	11	59224664	R	II	OR4D6	1stExon	opensea	1stExon-opensea		NA	NA
cg07862488	-0.358305	0.446334	-17.9616	1.2364e-29	1.91195e-27	57.064	0.625487	0.267182	-0.358305	14	60977054	R	II	SIX6	Body	island	Body-island	chr14:60975732-60978180	NA	NA
cg13953753	-0.192337	0.648956	-17.961	1.23912e-29	1.91542e-27	57.0618	0.745124	0.552787	-0.192337	10	118896012	F	I	VAX1	Body	island	Body-island	chr10:118895963-118898037	NA	NA
cg11696165	-0.370435	0.511554	-17.9576	1.25448e-29	1.93764e-27	57.0496	0.696772	0.326337	-0.370435	12	120663824	F	II	PXN	5'UTR	opensea	5'UTR-opensea		NA	NA	low-CpG:119148181-119148221
cg02558120	0.322495	0.636575	17.9574	1.25528e-29	1.93764e-27	57.0489	0.475327	0.797822	0.322495	7	143747596	R	II	OR2A5	1stExon	opensea	1stExon-opensea		NA	NA
cg16240162	-0.424372	0.376446	-17.9573	1.25542e-29	1.93764e-27	57.0488	0.588633	0.16426	-0.424372	3	147106890	F	I	ZIC4	Body	shore	Body-shore	chr3:147108511-147111703	NA	NA
cg12502079	-0.238055	0.745787	-17.9568	1.25794e-29	1.94058e-27	57.0468	0.864815	0.62676	-0.238055	22	51169028	R	II	SHANK3	Body	island	Body-island	chr22:51169027-51170019	NA	NA
cg01141459	-0.411719	0.459251	-17.9567	1.25829e-29	1.94058e-27	57.0465	0.665111	0.253392	-0.411719	22	30476452	R	I	HORMAD2	1stExon	island	1stExon-island	chr22:30476012-30476530	NA	NA
cg26311804	0.330234	0.669774	17.9508	1.2847e-29	1.97979e-27	57.0258	0.504657	0.834891	0.330234	11	133155303	F	I	OPCML	Body	opensea	Body-opensea		NA	TRUE
cg00546117	-0.198175	0.821576	-17.945	1.31164e-29	2.01809e-27	57.0051	0.920663	0.722488	-0.198175	1	8445545	R	II	RERE	5'UTR	opensea	5'UTR-opensea		NA	TRUE
cg05229598	0.365476	0.709485	17.9449	1.31206e-29	2.01809e-27	57.0048	0.526747	0.892223	0.365476	12	132699923	R	I	GALNT9	Body	shelf	Body-shelf	chr12:132696661-132697724	NA	NA
cg13507224	0.399805	0.713246	17.9446	1.3136e-29	2.01964e-27	57.0036	0.513344	0.913149	0.399805	1	159284298	F	II	OR10J3	1stExon	opensea	1stExon-opensea		NA	NA
cg07319375	0.170528	0.170373	17.9443	1.31463e-29	2.01972e-27	57.0028	0.0851091	0.255637	0.170528	1	6169384	F	II	CHD5	Body	opensea	Body-opensea		TRUE	NA		rs12046716
cg09685096	-0.198694	0.820922	-17.942	1.32561e-29	2.03426e-27	56.9945	0.920269	0.721575	-0.198694	1	86157111	F	II	ZNHIT6	Body	opensea	Body-opensea		NA	TRUE
cg05891548	0.345278	0.644952	17.94	1.33498e-29	2.04786e-27	56.9875	0.472313	0.817591	0.345278	19	42134620	F	II	CEACAM4	TSS1500	opensea	TSS1500-opensea		NA	NA
cg08411049	0.438141	0.647101	17.938	1.34437e-29	2.06133e-27	56.9805	0.42803	0.866171	0.438141	18	61144250	F	II	SERPINB5	1stExon	opensea	1stExon-opensea		NA	NA
cg11517269	-0.312943	0.620598	-17.938	1.34479e-29	2.06133e-27	56.9802	0.777069	0.464126	-0.312943	6	28058789	R	II	ZSCAN12L1	TSS200	opensea	TSS200-opensea		NA	NA
cg23371746	-0.357865	0.379308	-17.9346	1.36085e-29	2.08462e-27	56.9683	0.558241	0.200375	-0.357865	1	119532925	R	I	TBX15	TSS1500	shore	TSS1500-shore	chr1:119531991-119532196	NA	NA
cg24536349	0.407556	0.467061	17.9345	1.36153e-29	2.08462e-27	56.9678	0.263283	0.670839	0.407556	8	143781340	R	II	LY6K	TSS200	shore	TSS200-shore	chr8:143781581-143782609	TRUE	TRUE
cg06362313	0.389831	0.398122	17.9324	1.37144e-29	2.099e-27	56.9606	0.203207	0.593038	0.389831	12	6645287	R	II	GAPDH	Body	shore	Body-shore	chr12:6643261-6644607	NA	NA
cg01637011	0.100335	0.0733128	17.9295	1.38577e-29	2.12011e-27	56.9502	0.0231455	0.12348	0.100335	1	200992964	R	II	KIF21B	TSS200	shore	TSS200-shore	chr1:200992282-200992839	NA	NA
cg23681745	-0.281431	0.764704	-17.9279	1.39354e-29	2.13039e-27	56.9447	0.905419	0.623988	-0.281431	2	202004875	R	I	CFLAR	Body	opensea	Body-opensea		NA	NA
cg23049737	-0.229108	0.765156	-17.9273	1.3967e-29	2.1344e-27	56.9424	0.87971	0.650602	-0.229108	1	8412697	F	I	RERE	3'UTR	opensea	3'UTR-opensea		NA	NA
cg16469740	0.345069	0.486283	17.927	1.39817e-29	2.13584e-27	56.9414	0.313749	0.658817	0.345069	7	19018055	F	II	HDAC9	Body	opensea	Body-opensea		TRUE	TRUE
cg02189843	-0.283553	0.618013	-17.9263	1.40176e-29	2.1405e-27	56.9388	0.75979	0.476237	-0.283553	19	10625775	F	II	S1PR5	5'UTR	island	5'UTR-island	chr19:10624475-10625776	NA	NA		rs10416073
cg09466667	-0.153699	0.825564	-17.9258	1.40402e-29	2.14315e-27	56.9372	0.902414	0.748715	-0.153699	3	42140775	F	II	TRAK1	Body	opensea	Body-opensea		NA	TRUE
cg10588696	-0.413443	0.453133	-17.925	1.40804e-29	2.14847e-27	56.9343	0.659854	0.246411	-0.413443	15	76631894	R	II	ISL2	Body	shore	Body-shore	chr15:76632262-76635515	NA	NA
cg05603527	-0.316689	0.435986	-17.924	1.41319e-29	2.15551e-27	56.9307	0.59433	0.277641	-0.316689	2	71131629	R	I	VAX2	Body	island	Body-island	chr2:71131200-71132256	NA	NA
cg19802477	0.298388	0.648532	17.9223	1.42148e-29	2.16659e-27	56.9249	0.499338	0.797726	0.298388	19	54850444	R	II	LILRA4	TSS200	opensea	TSS200-opensea		NA	NA
cg06389019	0.496267	0.575107	17.9204	1.43139e-29	2.17914e-27	56.9179	0.326974	0.823241	0.496267	17	72755647	F	II	SLC9A3R1	Body	opensea	Body-opensea		TRUE	TRUE
cg14065857	0.417153	0.432671	17.918	1.44329e-29	2.19642e-27	56.9097	0.224094	0.641248	0.417153	2	33436054	R	II	LTBP1	Body	opensea	Body-opensea		TRUE	TRUE			rs72858018
cg03110787	-0.164147	0.846027	-17.9168	1.44946e-29	2.20498e-27	56.9054	0.928101	0.763953	-0.164147	19	6217641	F	II	MLLT1	Body	shelf	Body-shelf	chr19:6215147-6215566	NA	TRUE
cg08878744	0.333586	0.476847	17.9165	1.45118e-29	2.20593e-27	56.9042	0.310054	0.64364	0.333586	1	152783674	F	II	LCE1B	TSS1500	opensea	TSS1500-opensea		NA	NA			rs74130538
cg21052656	0.369508	0.416914	17.9159	1.45454e-29	2.2102e-27	56.9019	0.23216	0.601668	0.369508	11	67250046	R	II	AIP	TSS1500	shore	TSS1500-shore	chr11:67250344-67250864	NA	NA
cg23819092	-0.151943	0.848285	-17.9148	1.45979e-29	2.21735e-27	56.8983	0.924257	0.772314	-0.151943	1	156047143	F	II	MEX3A	Body	island	Body-island	chr1:156046343-156047384	NA	NA
cg12196045	0.276773	0.3058	17.9137	1.46565e-29	2.2254e-27	56.8943	0.167414	0.444187	0.276773	12	116997185	F	I	MAP1LC3B2	5'UTR	opensea	5'UTR-opensea		TRUE	TRUE		rs10850665
cg26319363	-0.194874	0.842888	-17.9103	1.4834e-29	2.25084e-27	56.8823	0.940325	0.745451	-0.194874	4	753903	R	II	PCGF3	Body	shore	Body-shore	chr4:752029-753788	NA	NA
cg07233230	0.410492	0.62986	17.9103	1.48353e-29	2.25084e-27	56.8822	0.424614	0.835106	0.410492	1	241912768	F	I	WDR64	Body	opensea	Body-opensea		NA	NA
cg01974091	0.415191	0.506602	17.91	1.48536e-29	2.25193e-27	56.881	0.299006	0.714197	0.415191	14	100625027	R	I	DEGS2	Body	shore	Body-shore	chr14:100625319-100626461	TRUE	NA
cg00689213	0.330311	0.503313	17.908	1.49552e-29	2.26562e-27	56.8742	0.338158	0.668469	0.330311	2	79366964	R	II	REG1P	TSS1500	opensea	TSS1500-opensea		NA	NA
cg07921625	-0.451749	0.329113	-17.9052	1.51082e-29	2.28794e-27	56.864	0.554987	0.103238	-0.451749	13	58208350	R	II	PCDH17	1stExon	island	1stExon-island	chr13:58206526-58208930	NA	NA
cg17117459	0.324782	0.373113	17.905	1.51199e-29	2.28885e-27	56.8633	0.210722	0.535504	0.324782	13	25085405	R	II	PARP4	5'UTR	shore	5'UTR-shore	chr13:25086522-25087067	NA	NA
cg17200137	-0.257733	0.759203	-17.9038	1.51823e-29	2.29658e-27	56.8592	0.888069	0.630336	-0.257733	10	48416896	F	II	GDF2	TSS200	shelf	TSS200-shelf	chr10:48413741-48413968	NA	NA		rs76241298
cg16783744	-0.365646	0.301083	-17.8999	1.53953e-29	2.32704e-27	56.8453	0.483906	0.11826	-0.365646	8	105478855	R	I	DPYS	Body	island	Body-island	chr8:105478672-105479340	NA	NA
cg04079301	-0.438654	0.333772	-17.8997	1.5407e-29	2.32794e-27	56.8445	0.553099	0.114445	-0.438654	3	147106635	F	II	ZIC4	3'UTR	shore	3'UTR-shore	chr3:147108511-147111703	NA	NA
cg24221853	0.325724	0.718502	17.8976	1.55204e-29	2.3442e-27	56.8372	0.55564	0.881364	0.325724	19	34174345	F	II	CHST8	5'UTR	shore	5'UTR-shore	chr19:34175344-34175768	NA	NA
cg05349159	0.360022	0.71495	17.8971	1.55499e-29	2.34776e-27	56.8353	0.534939	0.894961	0.360022	1	247695328	F	II	OR2C3	Body	shore	Body-shore	chr1:247694035-247694501	NA	NA
cg23474173	0.298549	0.721347	17.8946	1.56863e-29	2.36747e-27	56.8266	0.572073	0.870622	0.298549	14	23888492	R	II	MIR208B	TSS1500	shore	TSS1500-shore	chr14:23889144-23889408	NA	NA
cg23095743	-0.401278	0.314863	-17.8926	1.57968e-29	2.38236e-27	56.8196	0.515502	0.114224	-0.401278	10	104000831	F	I	PITX3	5'UTR	island	5'UTR-island	chr10:104000254-104001741	NA	NA
cg13951797	0.32454	0.436832	17.8915	1.58595e-29	2.39003e-27	56.8156	0.274562	0.599102	0.32454	16	2204381	R	II	TRAF7	TSS1500	shore	TSS1500-shore	chr16:2205207-2205902	NA	NA
cg17379860	0.362908	0.467981	17.8904	1.5921e-29	2.3984e-27	56.8118	0.286527	0.649435	0.362908	11	61159602	R	II	TMEM216	TSS1500	shore	TSS1500-shore	chr11:61159836-61160285	TRUE	NA
cg05384697	0.404316	0.593231	17.8901	1.59406e-29	2.40045e-27	56.8105	0.391073	0.795389	0.404316	12	130334009	R	II	TMEM132D	Body	opensea	Body-opensea		NA	NA
cg08982864	0.278664	0.508777	17.889	1.60039e-29	2.40908e-27	56.8066	0.369444	0.648109	0.278664	12	1945300	R	I	LRTM2	3'UTR	opensea	3'UTR-opensea		NA	NA
cg20340346	0.421781	0.727643	17.8885	1.60295e-29	2.41203e-27	56.805	0.516753	0.938534	0.421781	11	1250892	F	I	MUC5B	Body	shore	Body-shore	chr11:1252146-1252378	NA	NA		rs56069229
cg00835279	-0.407491	0.500144	-17.8859	1.61804e-29	2.43383e-27	56.7956	0.703889	0.296398	-0.407491	2	3642710	R	II	COLEC11	1stExon	island	1stExon-island	chr2:3642547-3642751	NA	TRUE
cg22009908	0.263855	0.24039	17.8848	1.62453e-29	2.44268e-27	56.7916	0.108462	0.372317	0.263855	5	106724064	R	II	EFNA5	Body	opensea	Body-opensea		NA	TRUE			rs76945754
cg25074066	0.274061	0.562485	17.8777	1.66569e-29	2.50269e-27	56.7667	0.425454	0.699515	0.274061	11	62690043	R	II	CHRM1	TSS1500	shore	TSS1500-shore	chr11:62690974-62691488	TRUE	TRUE
cg14197071	-0.369831	0.647999	-17.876	1.67594e-29	2.51716e-27	56.7606	0.832915	0.463084	-0.369831	4	81110459	F	II	PRDM8	5'UTR	island	5'UTR-island	chr4:81109887-81110460	NA	NA
cg26248075	-0.341356	0.499081	-17.8719	1.70056e-29	2.55223e-27	56.746	0.669759	0.328403	-0.341356	6	100895481	F	II	SIM1	Body	shore	Body-shore	chr6:100895773-100896062	NA	TRUE
cg01564135	-0.374062	0.552294	-17.8701	1.71136e-29	2.56652e-27	56.7397	0.739325	0.365264	-0.374062	7	27281216	F	II	EVX1	TSS1500	shore	TSS1500-shore	chr7:27282086-27283136	NA	TRUE
cg20644981	0.271636	0.31842	17.8688	1.71938e-29	2.57759e-27	56.735	0.182602	0.454238	0.271636	4	152020400	R	II	RPS3A	TSS1500	shore	TSS1500-shore	chr4:152020470-152021110	NA	NA
cg06148812	-0.397455	0.540388	-17.8643	1.74692e-29	2.61596e-27	56.7192	0.739116	0.34166	-0.397455	22	19746368	F	II	TBX1	5'UTR	island	5'UTR-island	chr22:19746155-19746369	NA	TRUE
cg03891318	0.372632	0.495691	17.8628	1.7562e-29	2.62887e-27	56.7139	0.309375	0.682007	0.372632	3	139372675	R	II	NMNAT3	5'UTR	opensea	5'UTR-opensea		NA	TRUE
cg03772567	-0.380052	0.557973	-17.86	1.77388e-29	2.65336e-27	56.7039	0.747999	0.367947	-0.380052	1	55676815	F	II	USP24	Body	shelf	Body-shelf	chr1:55680465-55681708	NA	NA
cg09173325	-0.161532	0.827632	-17.8576	1.78907e-29	2.67508e-27	56.6954	0.908399	0.746866	-0.161532	12	53458408	R	II	SPRYD3	3'UTR	opensea	3'UTR-opensea		NA	TRUE
cg22304262	0.332526	0.596492	17.8533	1.8167e-29	2.71539e-27	56.6801	0.430229	0.762755	0.332526	19	47287778	F	II	SLC1A5	Body	shelf	Body-shelf	chr19:47290585-47291983	NA	NA
cg07871456	0.310599	0.461752	17.8504	1.83549e-29	2.74042e-27	56.6698	0.306453	0.617051	0.310599	17	48796501	R	II	LUC7L3	TSS1500	shore	TSS1500-shore	chr17:48796750-48797317	NA	NA			rs34821474
cg06145336	-0.41123	0.496441	-17.849	1.84481e-29	2.75332e-27	56.6648	0.702056	0.290826	-0.41123	2	177027931	R	II	HOXD3	TSS1500	island	TSS1500-island	chr2:177027617-177028014	NA	NA
cg10743378	-0.187947	0.802605	-17.8463	1.86255e-29	2.77877e-27	56.6552	0.896579	0.708632	-0.187947	10	102028800	F	II	CWF19L1	TSS1500	shore	TSS1500-shore	chr10:102027099-102027490	NA	NA
cg03177025	0.258736	0.211922	17.846	1.86437e-29	2.77893e-27	56.6542	0.082554	0.34129	0.258736	2	28112917	R	II	BRE	TSS1500	shore	TSS1500-shore	chr2:28113060-28113764	NA	NA
cg10792987	-0.421892	0.452759	-17.846	1.86472e-29	2.77893e-27	56.6541	0.663705	0.241813	-0.421892	19	18575406	F	II	ELL	Body	shelf	Body-shelf	chr19:18572408-18572619	TRUE	NA		rs7246788
cg14314744	-0.358641	0.334685	-17.8445	1.87455e-29	2.79253e-27	56.6488	0.514006	0.155365	-0.358641	6	100897445	R	I	SIM1	Body	island	Body-island	chr6:100897080-100897621	NA	NA
cg15572436	0.289656	0.397672	17.84	1.90463e-29	2.83524e-27	56.6329	0.252843	0.5425	0.289656	11	62767169	F	II	SLC22A8	Body	opensea	Body-opensea		NA	NA
cg03794445	0.466604	0.674205	17.8398	1.90655e-29	2.83704e-27	56.6319	0.440903	0.907507	0.466604	1	209605401	F	II	LOC642587	Body	opensea	Body-opensea		NA	NA
cg01729491	-0.36553	0.527307	-17.8394	1.90897e-29	2.8396e-27	56.6307	0.710072	0.344541	-0.36553	7	27225772	F	II	HOXA11AS	Body	shore	Body-shore	chr7:27227520-27229043	NA	NA
cg11936643	0.292982	0.226423	17.8349	1.93951e-29	2.87974e-27	56.6148	0.0799319	0.372914	0.292982	10	116286411	R	II	ABLIM1	Body	opensea	Body-opensea		TRUE	TRUE
cg14184780	-0.218263	0.635031	-17.8349	1.93953e-29	2.87974e-27	56.6148	0.744163	0.5259	-0.218263	9	95475751	F	I	BICD2	Body	shore	Body-shore	chr9:95477296-95477708	NA	NA
cg21890667	-0.329622	0.59764	-17.8302	1.97278e-29	2.92694e-27	56.5979	0.762451	0.432829	-0.329622	22	30476089	F	I	HORMAD2	TSS1500	island	TSS1500-island	chr22:30476012-30476530	NA	NA
cg12131862	-0.199935	0.837561	-17.8289	1.9817e-29	2.93801e-27	56.5934	0.937529	0.737594	-0.199935	1	203613877	F	II	ATP2B4	5'UTR	opensea	5'UTR-opensea		NA	TRUE
cg15842276	-0.308452	0.536181	-17.8282	1.98678e-29	2.94446e-27	56.5908	0.690407	0.381955	-0.308452	11	92702648	R	II	MTNR1B	TSS200	shore	TSS200-shore	chr11:92702789-92703434	NA	TRUE
cg23946364	0.379907	0.711027	17.8271	1.99471e-29	2.95512e-27	56.5868	0.521073	0.90098	0.379907	2	235936477	F	II	SH3BP4	5'UTR	opensea	5'UTR-opensea		TRUE	NA		rs56394744
cg04046669	-0.385143	0.349096	-17.8267	1.99704e-29	2.95748e-27	56.5857	0.541667	0.156525	-0.385143	22	30476206	R	I	HORMAD2	TSS1500	island	TSS1500-island	chr22:30476012-30476530	NA	NA
cg19643053	-0.437965	0.604151	-17.8241	2.01605e-29	2.98344e-27	56.5762	0.823134	0.385168	-0.437965	7	27184271	R	II	HOXA5	TSS1500	island	TSS1500-island	chr7:27182613-27185562	NA	NA			rs66773026
cg08261450	0.360694	0.417364	17.8234	2.02101e-29	2.98968e-27	56.5738	0.237017	0.597711	0.360694	12	130384734	R	II	TMEM132D	Body	shelf	Body-shelf	chr12:130387609-130389139	NA	NA
cg21163617	0.387868	0.709967	17.8202	2.04398e-29	3.02254e-27	56.5625	0.516033	0.903902	0.387868	7	157384658	R	II	PTPRN2	Body	shelf	Body-shelf	chr7:157387053-157387322	NA	NA
cg26509715	-0.489732	0.37765	-17.8196	2.04876e-29	3.02851e-27	56.5601	0.622517	0.132784	-0.489732	2	119600627	R	II	EN1	Body	island	Body-island	chr2:119599458-119600966	NA	NA			rs79213977
cg07704934	-0.378348	0.32294	-17.8186	2.05597e-29	3.03581e-27	56.5566	0.512114	0.133766	-0.378348	11	44332940	F	I	ALX4	TSS1500	shore	TSS1500-shore	chr11:44330542-44331761	TRUE	NA		rs2054030
cg25717032	0.298651	0.418399	17.8182	2.0586e-29	3.03858e-27	56.5554	0.269073	0.567724	0.298651	19	35981549	F	II	KRTDAP	TSS200	opensea	TSS200-opensea		NA	NA		rs73043062
cg20850016	0.117949	0.0978725	17.8156	2.07793e-29	3.06486e-27	56.546	0.0388978	0.156847	0.117949	3	5165254	F	II	ARL8B	Body	shore	Body-shore	chr3:5163838-5164540	NA	NA
cg23075337	-0.45703	0.514927	-17.815	2.08247e-29	3.07044e-27	56.5439	0.743442	0.286412	-0.45703	7	8481460	R	II	NXPH1	Body	shore	Body-shore	chr7:8481974-8482762	NA	NA
cg03577157	0.415637	0.417028	17.8101	2.11905e-29	3.12207e-27	56.5265	0.209209	0.624847	0.415637	5	80716263	F	II	RNU5E	Body	opensea	Body-opensea		NA	TRUE
cg08249698	0.346108	0.593963	17.8079	2.1355e-29	3.14402e-27	56.5188	0.420909	0.767018	0.346108	16	6610161	R	II	A2BP1	5'UTR	opensea	5'UTR-opensea		NA	TRUE
cg08977887	0.386407	0.590191	17.8056	2.15335e-29	3.16913e-27	56.5105	0.396987	0.783394	0.386407	8	98963918	F	II	MATN2	Body	opensea	Body-opensea		NA	TRUE
cg20969194	-0.419044	0.411047	-17.8021	2.18019e-29	3.20628e-27	56.4981	0.620569	0.201525	-0.419044	2	223163175	R	II	PAX3	Body	island	Body-island	chr2:223162946-223163912	NA	NA
cg23674202	-0.239575	0.789211	-17.8005	2.19282e-29	3.22369e-27	56.4923	0.908999	0.669424	-0.239575	17	80541549	F	I	FOXK2	Body	island	Body-island	chr17:80541548-80541754	NA	NA
cg01300684	0.32153	0.66378	17.7986	2.20742e-29	3.24279e-27	56.4857	0.503015	0.824545	0.32153	4	141230118	F	II	SCOC	5'UTR	opensea	5'UTR-opensea		NA	TRUE
cg23338993	0.380509	0.576865	17.7978	2.21395e-29	3.24999e-27	56.4828	0.386611	0.767119	0.380509	2	234600423	R	II	UGT1A10	Body	opensea	Body-opensea		NA	NA
cg04927931	-0.496597	0.353941	-17.7973	2.21821e-29	3.2527e-27	56.4809	0.602239	0.105642	-0.496597	6	100911701	F	I	SIM1	TSS200	shore	TSS200-shore	chr6:100912071-100913337	TRUE	TRUE		rs80193484
cg06968859	0.481986	0.524769	17.792	2.26058e-29	3.31241e-27	56.462	0.283776	0.765762	0.481986	2	80724209	F	II	CTNNA2	Body	opensea	Body-opensea		NA	TRUE
cg03846767	0.403906	0.587321	17.7906	2.27181e-29	3.32644e-27	56.457	0.385368	0.789275	0.403906	1	3607292	F	II	TP73	1stExon	island	1stExon-island	chr1:3607096-3607553	NA	NA
cg02109484	-0.272475	0.487895	-17.7861	2.30828e-29	3.37739e-27	56.4411	0.624132	0.351658	-0.272475	2	74875253	F	I	C2orf65	TSS200	island	TSS200-island	chr2:74875128-74875562	NA	NA
cg14585967	0.420164	0.610629	17.7854	2.31433e-29	3.38501e-27	56.4385	0.400547	0.820711	0.420164	9	118135710	F	II	2019-12-01	5'UTR	opensea	5'UTR-opensea		TRUE	NA
cg14195925	0.401663	0.566954	17.7849	2.31831e-29	3.38959e-27	56.4368	0.366123	0.767786	0.401663	17	77224403	F	I	HRNBP3	5'UTR	opensea	5'UTR-opensea		NA	NA
cg00446472	0.336533	0.516109	17.7839	2.32682e-29	3.4008e-27	56.4332	0.347842	0.684376	0.336533	16	89042082	R	II	CBFA2T3	Body	opensea	Body-opensea		NA	NA
cg14975798	-0.175403	0.744245	-17.7808	2.35255e-29	3.43342e-27	56.4222	0.831947	0.656543	-0.175403	3	111835839	F	I	C3orf52	3'UTR	opensea	3'UTR-opensea		NA	NA
cg02711479	-0.206853	0.859675	-17.776	2.39284e-29	3.48968e-27	56.4052	0.963102	0.756249	-0.206853	1	36849024	F	II	STK40	5'UTR	shelf	5'UTR-shelf	chr1:36851089-36851873	NA	NA
cg02770983	-0.369256	0.580047	-17.7677	2.46504e-29	3.58848e-27	56.3756	0.764675	0.395419	-0.369256	11	31822341	F	II	PAX6	Body	shore	Body-shore	chr11:31820060-31821416	NA	NA			rs1800427
cg04628369	-0.466441	0.451365	-17.7661	2.47912e-29	3.60768e-27	56.3699	0.684585	0.218144	-0.466441	20	56247426	R	II	PMEPA1	5'UTR	island	5'UTR-island	chr20:56247249-56247651	NA	NA
cg14964285	-0.107625	0.860288	-17.7658	2.48144e-29	3.60974e-27	56.369	0.9141	0.806476	-0.107625	12	4435533	R	II	C12orf5	Body	shore	Body-shore	chr12:4433733-4433984	NA	NA
cg26708319	-0.345431	0.289128	-17.7657	2.48262e-29	3.61015e-27	56.3685	0.461843	0.116412	-0.345431	4	111552040	R	I	PITX2	Body	shore	Body-shore	chr4:111553079-111554210	NA	NA
cg12705693	0.436674	0.630717	17.7615	2.51984e-29	3.66163e-27	56.3536	0.41238	0.849055	0.436674	5	912860	F	II	TRIP13	Body	island	Body-island	chr5:912494-912861	NA	NA
cg04598774	-0.388192	0.332072	-17.7566	2.56446e-29	3.72512e-27	56.3361	0.526168	0.137976	-0.388192	11	31821590	R	II	PAX6	Body	shore	Body-shore	chr11:31820060-31821416	NA	NA
cg09856467	-0.232199	0.735562	-17.7564	2.56618e-29	3.72628e-27	56.3355	0.851661	0.619462	-0.232199	22	26938937	R	II	TPST2	5'UTR	shore	5'UTR-shore	chr22:26936996-26937672	NA	NA
cg00957698	-0.329238	0.699369	-17.7543	2.58625e-29	3.75406e-27	56.3277	0.863988	0.53475	-0.329238	4	121991345	R	II	C4orf31	5'UTR	shore	5'UTR-shore	chr4:121992003-121993703	NA	NA
cg24629972	0.384895	0.573208	17.7523	2.60413e-29	3.7773e-27	56.3208	0.38076	0.765655	0.384895	8	43147439	R	I	POTEA	TSS200	opensea	TSS200-opensea		NA	NA
cg03147185	0.224014	0.291786	17.7497	2.62868e-29	3.81153e-27	56.3114	0.17978	0.403793	0.224014	2	97008030	F	II	NCAPH	Body	opensea	Body-opensea		NA	TRUE
cg21870038	0.226004	0.153037	17.7481	2.64396e-29	3.8323e-27	56.3057	0.0400351	0.26604	0.226004	17	33390736	R	II	RFFL	1stExon	opensea	1stExon-opensea		TRUE	TRUE	low-CpG:30414789-30414854
cg25172185	0.427462	0.596911	17.7471	2.65287e-29	3.84384e-27	56.3023	0.38318	0.810642	0.427462	17	31689788	R	II	ACCN1	Body	opensea	Body-opensea		NA	TRUE
cg19523667	-0.185438	0.774858	-17.747	2.65446e-29	3.84476e-27	56.3017	0.867577	0.682139	-0.185438	7	44795780	F	II	ZMIZ2	TSS200	opensea	TSS200-opensea		NA	NA
cg04351905	0.307804	0.637916	17.7446	2.67717e-29	3.87509e-27	56.2932	0.484014	0.791818	0.307804	21	34441330	R	II	OLIG1	TSS1500	shore	TSS1500-shore	chr21:34442206-34444543	NA	NA
cg12359158	-0.252577	0.673832	-17.7422	2.70033e-29	3.90417e-27	56.2846	0.80012	0.547543	-0.252577	6	134210253	R	II	TCF21	TSS200	shore	TSS200-shore	chr6:134210639-134211218	NA	NA	low-CpG:134251940-134251970
cg27407147	-0.465858	0.452824	-17.7409	2.71228e-29	3.92004e-27	56.2802	0.685753	0.219895	-0.465858	15	89920824	R	I	LOC254559	TSS1500	island	TSS1500-island	chr15:89920793-89922768	NA	NA
cg06842954	-0.394207	0.350615	-17.7355	2.76546e-29	3.99259e-27	56.2608	0.547718	0.153512	-0.394207	4	111559066	R	I	PITX2	TSS1500	shore	TSS1500-shore	chr4:111560563-111560808	NA	NA
cg02707176	-0.321491	0.55634	-17.7336	2.78475e-29	4.01899e-27	56.2539	0.717085	0.395594	-0.321491	5	140798758	F	I	PCDHGA4	Body	island	Body-island	chr5:140798757-140799359	NA	NA
cg23220439	0.401839	0.487359	17.7323	2.79717e-29	4.03404e-27	56.2495	0.286439	0.688278	0.401839	11	66104481	F	II	RIN1	TSS1500	shelf	TSS1500-shelf	chr11:66102024-66102279	NA	NA
cg01656853	0.245913	0.372792	17.7308	2.81196e-29	4.0539e-27	56.2442	0.249835	0.495748	0.245913	19	49199172	F	II	FUT2	TSS200	shore	TSS200-shore	chr19:49199964-49200184	NA	NA
cg10588135	-0.447811	0.366141	-17.7274	2.84634e-29	4.09906e-27	56.2321	0.590046	0.142235	-0.447811	17	59329903	R	II	BCAS3	Body	opensea	Body-opensea		TRUE	TRUE
cg12761728	-0.214747	0.794928	-17.7247	2.87474e-29	4.137e-27	56.2222	0.902301	0.687554	-0.214747	6	32800523	F	I	TAP2	Body	opensea	Body-opensea		NA	NA
cg01022345	0.329147	0.654229	17.7219	2.90319e-29	4.17197e-27	56.2123	0.489656	0.818803	0.329147	14	101317819	F	II	MIR770	TSS1500	opensea	TSS1500-opensea		TRUE	NA
cg25322008	0.291351	0.694359	17.7192	2.93098e-29	4.2104e-27	56.2028	0.548684	0.840035	0.291351	11	4719138	R	II	OR51E2	TSS200	opensea	TSS200-opensea		NA	NA
cg06386307	-0.328136	0.56116	-17.7183	2.9412e-29	4.22359e-27	56.1993	0.725228	0.397092	-0.328136	6	100895211	F	II	SIM1	Body	island	Body-island	chr6:100895007-100895246	NA	TRUE
cg12475507	-0.297947	0.629501	-17.7162	2.96267e-29	4.25228e-27	56.1921	0.778475	0.480528	-0.297947	1	3567852	R	II	TP73	TSS1500	island	TSS1500-island	chr1:3566445-3569636	NA	NA
cg13538299	0.252975	0.570615	17.7142	2.98421e-29	4.27923e-27	56.1849	0.444127	0.697103	0.252975	7	157466994	R	II	PTPRN2	Body	opensea	Body-opensea		NA	NA
cg02544031	0.350072	0.713497	17.7105	3.02432e-29	4.33521e-27	56.1715	0.538461	0.888532	0.350072	12	120029973	F	II	TMEM233	TSS1500	shore	TSS1500-shore	chr12:120031494-120033212	NA	NA		rs75952958
cg03143486	-0.210217	0.839497	-17.7046	3.08885e-29	4.42298e-27	56.1505	0.944605	0.734388	-0.210217	7	811491	R	II	HEATR2	Body	shelf	Body-shelf	chr7:813627-814392	NA	TRUE
cg15723222	-0.254872	0.644146	-17.7039	3.09623e-29	4.43197e-27	56.1481	0.771582	0.51671	-0.254872	17	59222476	R	I	BCAS3	Body	opensea	Body-opensea		NA	TRUE
cg18440069	0.33354	0.704626	17.7	3.14031e-29	4.49347e-27	56.134	0.537856	0.871396	0.33354	14	101488391	R	II	MIR411	TSS1500	opensea	TSS1500-opensea		NA	NA
cg24576995	0.358406	0.604034	17.6982	3.15987e-29	4.51949e-27	56.1278	0.424831	0.783236	0.358406	7	157854008	F	II	PTPRN2	Body	opensea	Body-opensea		NA	NA		rs10275348	rs62480172
cg20348858	-0.373231	0.390039	-17.6981	3.16074e-29	4.51949e-27	56.1275	0.576655	0.203424	-0.373231	10	119305335	R	II	EMX2	Body	island	Body-island	chr10:119301321-119305368	NA	NA
cg25750259	0.16587	0.119325	17.6976	3.16646e-29	4.52359e-27	56.1257	0.0363906	0.20226	0.16587	20	43104962	R	II	TTPAL	5'UTR	shore	5'UTR-shore	chr20:43104406-43104654	NA	NA
cg13358636	-0.359601	0.292613	-17.6976	3.16698e-29	4.52359e-27	56.1255	0.472413	0.112812	-0.359601	2	124782263	R	I	CNTNAP5	TSS1500	island	TSS1500-island	chr2:124782252-124783255	NA	NA
cg09238180	-0.500028	0.296757	-17.6966	3.17819e-29	4.53799e-27	56.122	0.546771	0.0467425	-0.500028	2	176993632	F	I	HOXD8	TSS1500	island	TSS1500-island	chr2:176993479-176995557	TRUE	TRUE
cg14992633	0.34176	0.72818	17.696	3.18508e-29	4.54621e-27	56.1199	0.5573	0.89906	0.34176	7	129962562	R	II	CPA4	3'UTR	opensea	3'UTR-opensea		NA	NA
cg13551263	0.32288	0.502013	17.6954	3.19156e-29	4.55385e-27	56.1178	0.340573	0.663453	0.32288	9	138662115	F	I	KCNT1	Body	shore	Body-shore	chr9:138662597-138663009	NA	NA
cg00969405	-0.397178	0.641981	-17.6926	3.2244e-29	4.59745e-27	56.1076	0.84057	0.443392	-0.397178	7	27184441	R	II	HOXA5	TSS1500	island	TSS1500-island	chr7:27182613-27185562	NA	NA
cg19940482	0.328303	0.573411	17.6906	3.2471e-29	4.62653e-27	56.1006	0.40926	0.737563	0.328303	11	125190793	R	II	PKNOX2	5'UTR	opensea	5'UTR-opensea		NA	TRUE
cg21807034	0.416298	0.625883	17.684	3.32438e-29	4.73216e-27	56.0771	0.417734	0.834032	0.416298	18	61144150	R	I	SERPINB5	1stExon	opensea	1stExon-opensea		NA	NA
cg20181079	0.384326	0.733055	17.6836	3.32989e-29	4.73779e-27	56.0755	0.540891	0.925218	0.384326	11	59270409	F	II	OR4D11	TSS1500	opensea	TSS1500-opensea		NA	NA
cg27045835	-0.127383	0.884459	-17.6825	3.3429e-29	4.75293e-27	56.0716	0.94815	0.820767	-0.127383	16	21191089	F	II	TMEM159	3'UTR	opensea	3'UTR-opensea		NA	NA		rs78307543
cg02452944	-0.368256	0.407353	-17.6813	3.35657e-29	4.77068e-27	56.0675	0.591482	0.223225	-0.368256	5	140810109	F	I	PCDHGA4	Body	shore	Body-shore	chr5:140810494-140812617	TRUE	NA	low-CpG:140790256-140790651
cg13270625	0.299114	0.74565	17.6784	3.39158e-29	4.81703e-27	56.0572	0.596093	0.895207	0.299114	18	21452819	F	II	LAMA3	TSS200	opensea	TSS200-opensea		NA	NA			rs77542553
cg21653149	-0.257027	0.770134	-17.6782	3.39443e-29	4.81938e-27	56.0563	0.898648	0.64162	-0.257027	17	4108148	F	II	ANKFY1	Body	opensea	Body-opensea		TRUE	TRUE
cg16553757	-0.253519	0.774785	-17.6771	3.40831e-29	4.83738e-27	56.0523	0.901545	0.648026	-0.253519	15	67007131	R	II	SMAD6	Body	opensea	Body-opensea		NA	TRUE
cg09255514	-0.199444	0.739356	-17.6758	3.42377e-29	4.85589e-27	56.0478	0.839078	0.639634	-0.199444	16	16181832	R	II	ABCC1	Body	opensea	Body-opensea		NA	TRUE
cg25188395	-0.340231	0.42103	-17.6757	3.42549e-29	4.85663e-27	56.0472	0.591145	0.250914	-0.340231	7	27204052	F	I	HOXA9	Body	island	Body-island	chr7:27203915-27206462	NA	NA
cg01294808	-0.302056	0.592626	-17.6746	3.43871e-29	4.87365e-27	56.0434	0.743654	0.441598	-0.302056	5	3599686	R	I	IRX1	Body	island	Body-island	chr5:3594467-3603054	TRUE	NA			rs61745751
cg26908825	-0.181541	0.866126	-17.6715	3.4771e-29	4.9246e-27	56.0323	0.956896	0.775355	-0.181541	6	1635818	R	II	GMDS	Body	opensea	Body-opensea		NA	NA
cg18646828	0.445442	0.670699	17.6701	3.49461e-29	4.94765e-27	56.0273	0.447979	0.89342	0.445442	14	101459547	F	II	SNORD114-31	TSS200	opensea	TSS200-opensea		NA	NA		rs76137386
cg12815355	-0.227005	0.79675	-17.6687	3.5125e-29	4.97124e-27	56.0222	0.910252	0.683247	-0.227005	2	75894077	F	II	C2orf3	Body	opensea	Body-opensea		NA	TRUE
cg22524864	0.403863	0.655017	17.6677	3.52478e-29	4.98686e-27	56.0187	0.453085	0.856949	0.403863	19	35613900	R	I	FXYD3	Body	shore	Body-shore	chr19:35615412-35615665	NA	NA
cg00206542	0.365647	0.762318	17.6669	3.53483e-29	4.99622e-27	56.0159	0.579494	0.945141	0.365647	11	59210965	R	II	OR5A1	1stExon	opensea	1stExon-opensea		NA	NA
cg13286614	-0.40237	0.496527	-17.6669	3.53512e-29	4.99622e-27	56.0158	0.697712	0.295342	-0.40237	7	96655501	R	II	DLX5	TSS1500	shore	TSS1500-shore	chr7:96653467-96654199	NA	TRUE
cg17384889	-0.326049	0.281803	-17.6665	3.53928e-29	5.00034e-27	56.0146	0.444827	0.118778	-0.326049	6	28227068	R	I	NKAPL	TSS200	island	TSS200-island	chr6:28226979-28227483	NA	NA	high-CpG:28335047-28335084
cg15948504	-0.115077	0.876164	-17.6618	3.60026e-29	5.08115e-27	55.9976	0.933703	0.818626	-0.115077	1	151285561	F	II	PI4KB	Body	opensea	Body-opensea		NA	TRUE
cg23636833	0.302229	0.551726	17.6604	3.61757e-29	5.10379e-27	55.9928	0.400611	0.70284	0.302229	7	157514822	F	I	PTPRN2	Body	opensea	Body-opensea		NA	NA			rs4716773
cg08258066	0.148143	0.153444	17.6588	3.63838e-29	5.12955e-27	55.9871	0.0793725	0.227516	0.148143	20	30605656	F	I	C20orf160	Body	shore	Body-shore	chr20:30605744-30605970	TRUE	NA
cg12993163	-0.443138	0.309589	-17.6552	3.68545e-29	5.19227e-27	55.9743	0.531158	0.0880199	-0.443138	3	157821407	F	I	SHOX2	Body	island	Body-island	chr3:157821232-157821604	NA	NA		rs1608102
cg02466815	-0.558361	0.400618	-17.6549	3.68936e-29	5.19596e-27	55.9732	0.679799	0.121438	-0.558361	2	177054573	F	II	HOXD1	Body	shore	Body-shore	chr2:177052957-177054350	NA	NA
cg20872072	0.315028	0.68389	17.6531	3.71382e-29	5.22857e-27	55.9666	0.526376	0.841404	0.315028	2	27607616	R	II	PPM1G	Body	shelf	Body-shelf	chr2:27603350-27604064	NA	NA
cg01323381	-0.450738	0.592299	-17.6479	3.78324e-29	5.32258e-27	55.9481	0.817668	0.36693	-0.450738	7	27184264	R	II	HOXA5	TSS1500	island	TSS1500-island	chr7:27182613-27185562	NA	NA
cg23149881	0.422248	0.557191	17.6476	3.78808e-29	5.32583e-27	55.9468	0.346067	0.768315	0.422248	2	113594654	R	II	IL1B	TSS1500	opensea	TSS1500-opensea		NA	NA
cg10848367	0.317001	0.524826	17.646	3.80922e-29	5.35352e-27	55.9413	0.366326	0.683327	0.317001	11	62009065	R	II	SCGB1D2	TSS1500	opensea	TSS1500-opensea		NA	NA
cg01460202	-0.368994	0.359102	-17.6421	3.86302e-29	5.42534e-27	55.9273	0.543599	0.174605	-0.368994	16	23706506	F	II	ERN2	Body	opensea	Body-opensea		NA	TRUE
cg08431536	-0.390833	0.262743	-17.6417	3.86871e-29	5.43121e-27	55.9258	0.458159	0.0673261	-0.390833	2	223161894	R	I	PAX3	Body	island	Body-island	chr2:223161531-223161919	NA	NA			rs12623857
cg23786580	0.422036	0.383032	17.6416	3.8699e-29	5.43121e-27	55.9255	0.172014	0.59405	0.422036	7	43204506	F	II	HECW1	5'UTR	opensea	5'UTR-opensea		TRUE	TRUE
cg25918267	-0.197017	0.760493	-17.6413	3.87395e-29	5.43311e-27	55.9245	0.859002	0.661985	-0.197017	11	1524715	F	II	HCCA2	Body	opensea	Body-opensea		NA	TRUE
cg14236662	-0.526072	0.441457	-17.6411	3.87724e-29	5.43582e-27	55.9236	0.704493	0.178421	-0.526072	2	176988284	F	II	HOXD9	1stExon	island	1stExon-island	chr2:176986424-176988291	TRUE	TRUE		rs35578003	rs10665265
cg12231340	-0.209527	0.793606	-17.6401	3.89159e-29	5.45404e-27	55.9199	0.898369	0.688842	-0.209527	12	52685221	F	II	KRT81	1stExon	island	1stExon-island	chr12:52684945-52685222	NA	NA
cg08244301	-0.45271	0.516746	-17.6395	3.89928e-29	5.46292e-27	55.918	0.7431	0.290391	-0.45271	19	17610751	R	II	SLC27A1	Body	shore	Body-shore	chr19:17611345-17611664	NA	TRUE
cg05945615	0.0897313	0.068821	17.6392	3.90357e-29	5.46702e-27	55.9169	0.0239553	0.113687	0.0897313	22	38035456	R	I	SH3BP1	TSS1500	island	TSS1500-island	chr22:38035350-38035928	TRUE	NA	high-CpG:36365393-36365781
cg20457275	-0.43789	0.475345	-17.6377	3.92501e-29	5.49513e-27	55.9114	0.69429	0.256401	-0.43789	6	1394071	R	II	FOXF2	Body	island	Body-island	chr6:1393049-1394170	NA	TRUE
cg00743788	0.21654	0.279749	17.6365	3.94211e-29	5.51715e-27	55.9071	0.171479	0.388019	0.21654	22	50701157	F	I	MAPK12	TSS1500	shore	TSS1500-shore	chr22:50699469-50700358	NA	NA
cg11650648	0.300454	0.446867	17.6355	3.95564e-29	5.53416e-27	55.9037	0.29664	0.597094	0.300454	17	9741522	F	II	GLP2R	Body	opensea	Body-opensea		NA	TRUE
cg19867917	-0.401305	0.543209	-17.6322	4.00267e-29	5.59608e-27	55.8919	0.743862	0.342557	-0.401305	2	3642629	R	I	COLEC11	TSS200	island	TSS200-island	chr2:3642547-3642751	TRUE	TRUE
cg03234072	-0.207172	0.84984	-17.6298	4.03691e-29	5.64198e-27	55.8834	0.953426	0.746254	-0.207172	13	99124270	F	II	STK24	Body	shelf	Body-shelf	chr13:99127039-99127344	NA	NA		rs80149139
cg03770907	0.376224	0.548979	17.6292	4.0467e-29	5.65175e-27	55.8809	0.360868	0.737091	0.376224	19	56443824	R	II	NLRP13	TSS200	opensea	TSS200-opensea		NA	NA
cg01909243	-0.259191	0.77677	-17.6287	4.05298e-29	5.65855e-27	55.8794	0.906366	0.647175	-0.259191	1	173822262	R	II	DARS2	Body	opensea	Body-opensea		NA	TRUE
cg01256139	-0.26851	0.660869	-17.6275	4.07139e-29	5.68028e-27	55.8749	0.795124	0.526614	-0.26851	2	161228737	F	II	RBMS1	Body	opensea	Body-opensea		NA	TRUE
cg25247290	-0.399732	0.360397	-17.6275	4.07152e-29	5.68028e-27	55.8748	0.560263	0.160531	-0.399732	11	32461212	R	I	WIT1	Body	shore	Body-shore	chr11:32459422-32459878	NA	NA
cg13585776	-0.270166	0.39845	-17.6274	4.07278e-29	5.68028e-27	55.8745	0.533533	0.263367	-0.270166	9	126783547	R	I	LHX2	Body	shore	Body-shore	chr9:126785021-126785225	NA	TRUE
cg00042837	-0.46588	0.281972	-17.6263	4.08836e-29	5.70003e-27	55.8707	0.514912	0.0490321	-0.46588	17	37028650	R	II	LASP1	Body	shore	Body-shore	chr17:37025737-37027104	NA	NA
cg18483459	-0.295313	0.726527	-17.6256	4.09896e-29	5.71283e-27	55.8681	0.874184	0.57887	-0.295313	2	203294144	R	II	BMPR2	Body	opensea	Body-opensea		NA	TRUE
cg15102821	0.300179	0.507328	17.6243	4.11718e-29	5.73624e-27	55.8637	0.357239	0.657418	0.300179	1	1844801	F	II	CALML6	TSS1500	opensea	TSS1500-opensea		NA	NA
cg06698795	-0.304922	0.51659	-17.6239	4.12437e-29	5.74427e-27	55.862	0.669051	0.364129	-0.304922	3	126260615	F	I	CHST13	Body	island	Body-island	chr3:126260488-126261356	TRUE	NA		rs12495696
cg02029908	-0.409552	0.655026	-17.6237	4.12738e-29	5.74646e-27	55.8612	0.859802	0.450249	-0.409552	5	172195602	R	II	DUSP1	3'UTR	shore	3'UTR-shore	chr5:172197482-172199606	NA	NA
cg02637101	-0.227988	0.733472	-17.6235	4.12922e-29	5.74705e-27	55.8608	0.847466	0.619478	-0.227988	15	99548944	R	II	LOC145814	5'UTR	opensea	5'UTR-opensea		TRUE	NA
cg14742361	-0.236747	0.811666	-17.6214	4.16124e-29	5.78961e-27	55.8531	0.93004	0.693293	-0.236747	8	74505941	F	II	STAU2	Body	opensea	Body-opensea		NA	TRUE		rs869344
cg26777456	-0.389663	0.494712	-17.6212	4.16377e-29	5.79055e-27	55.8525	0.689543	0.29988	-0.389663	12	54454250	R	II	FLJ12825	Body	island	Body-island	chr12:54454249-54454458	NA	TRUE
cg06001997	0.347696	0.662084	17.6191	4.196e-29	5.8299e-27	55.8448	0.488236	0.835932	0.347696	20	44664422	R	II	SLC12A5	Body	shelf	Body-shelf	chr20:44660342-44660948	NA	NA
cg03445287	-0.386057	0.522657	-17.6158	4.24466e-29	5.8914e-27	55.8333	0.715685	0.329628	-0.386057	8	21823731	F	II	XPO7	TSS200	opensea	TSS200-opensea		NA	TRUE		rs75675402
cg10026317	-0.345089	0.453888	-17.6156	4.24913e-29	5.89557e-27	55.8322	0.626433	0.281343	-0.345089	1	47694919	R	I	TAL1	5'UTR	shore	5'UTR-shore	chr1:47696504-47698197	NA	NA
cg26630171	-0.211902	0.773263	-17.6144	4.2671e-29	5.91781e-27	55.828	0.879214	0.667313	-0.211902	19	3459270	F	I	NFIC	Body	shelf	Body-shelf	chr19:3463231-3464358	TRUE	NA
cg27178401	-0.34939	0.634095	-17.6137	4.27728e-29	5.92646e-27	55.8256	0.808789	0.4594	-0.34939	16	10652711	R	I	EMP2	5'UTR	opensea	5'UTR-opensea		NA	NA
cg23268208	-0.344682	0.551022	-17.6117	4.30855e-29	5.96774e-27	55.8184	0.723363	0.378681	-0.344682	22	30476345	F	II	HORMAD2	TSS200	island	TSS200-island	chr22:30476012-30476530	NA	NA
cg21406271	-0.43287	0.527996	-17.6069	4.38311e-29	6.06683e-27	55.8012	0.744431	0.311561	-0.43287	1	25258082	F	II	RUNX3	TSS1500	island	TSS1500-island	chr1:25255527-25259005	NA	NA
cg06251978	0.301477	0.319345	17.6056	4.40434e-29	6.09203e-27	55.7964	0.168607	0.470083	0.301477	1	159507078	R	II	OR10J5	TSS1500	opensea	TSS1500-opensea		NA	NA
cg09870137	-0.268527	0.441967	-17.5964	4.55106e-29	6.28416e-27	55.7637	0.576231	0.307704	-0.268527	22	46320026	F	II	WNT7B	Body	shore	Body-shore	chr22:46318693-46319087	NA	NA
cg02859866	0.257983	0.315151	17.5948	4.57783e-29	6.3168e-27	55.7579	0.18616	0.444143	0.257983	10	13760165	F	II	FRMD4A	Body	opensea	Body-opensea		TRUE	TRUE		rs3814670
cg21037008	-0.520292	0.459709	-17.5945	4.58291e-29	6.32163e-27	55.7568	0.719855	0.199563	-0.520292	6	32119939	R	II	PRRT1	TSS1500	shore	TSS1500-shore	chr6:32121829-32122529	NA	TRUE
cg27388911	0.26637	0.3484	17.5935	4.59905e-29	6.34172e-27	55.7533	0.215215	0.481585	0.26637	3	24537277	F	II	THRB	TSS1500	island	TSS1500-island	chr3:24535844-24537436	TRUE	NA
cg05884870	-0.43317	0.527389	-17.5894	4.66674e-29	6.42936e-27	55.7387	0.743974	0.310804	-0.43317	15	100654807	F	II	ADAMTS17	Body	opensea	Body-opensea		TRUE	NA
cg21185289	-0.473293	0.266631	-17.5894	4.6674e-29	6.42936e-27	55.7385	0.503277	0.0299839	-0.473293	2	74743437	R	I	TLX2	3'UTR	island	3'UTR-island	chr2:74740455-74743795	NA	NA
cg19229692	0.43067	0.700618	17.5869	4.70862e-29	6.48392e-27	55.7298	0.485283	0.915953	0.43067	7	131830279	F	II	PLXNA4	Body	opensea	Body-opensea		TRUE	NA		rs2122635
cg00306578	0.332913	0.747675	17.5855	4.73271e-29	6.51487e-27	55.7247	0.581219	0.914132	0.332913	16	71570932	R	II	CHST4	Body	opensea	Body-opensea		NA	NA
cg03398865	-0.350803	0.490805	-17.5845	4.75054e-29	6.53493e-27	55.7209	0.666207	0.315404	-0.350803	5	1879554	F	II	IRX4	Body	shore	Body-shore	chr5:1879689-1879928	NA	NA
cg27406678	-0.443698	0.322884	-17.5821	4.79055e-29	6.58773e-27	55.7125	0.544733	0.101035	-0.443698	4	85417612	F	II	NKX6-1	Body	shore	Body-shore	chr4:85417659-85420799	NA	NA
cg10366786	0.262187	0.356451	17.5815	4.80161e-29	6.60067e-27	55.7102	0.225358	0.487544	0.262187	4	53578129	F	I	SNORA26	TSS1500	shore	TSS1500-shore	chr4:53578358-53579238	NA	NA
cg17929770	-0.250849	0.541506	-17.5808	4.81372e-29	6.61282e-27	55.7077	0.666931	0.416082	-0.250849	19	46318514	R	I	RSPH6A	1stExon	island	1stExon-island	chr19:46318490-46319266	NA	NA
cg05733285	0.367487	0.667415	17.5753	4.90904e-29	6.74145e-27	55.6882	0.483672	0.851159	0.367487	20	44168184	F	II	WFDC6	TSS200	opensea	TSS200-opensea		NA	NA		rs6017600
cg06245037	-0.360321	0.255239	-17.5746	4.92161e-29	6.75641e-27	55.6856	0.4354	0.075079	-0.360321	11	44332938	F	I	ALX4	TSS1500	shore	TSS1500-shore	chr11:44330542-44331761	TRUE	NA		rs2054030
cg27307183	-0.205863	0.776828	-17.5697	5.00902e-29	6.86937e-27	55.668	0.879759	0.673896	-0.205863	6	4890095	R	II	CDYL	5'UTR	opensea	5'UTR-opensea		NA	NA
cg06576557	0.405279	0.528132	17.5644	5.10556e-29	6.99461e-27	55.649	0.325492	0.730771	0.405279	20	31828749	F	II	PLUNC	Body	opensea	Body-opensea		NA	NA
cg01152019	-0.469079	0.396467	-17.5633	5.12694e-29	7.02152e-27	55.6448	0.631007	0.161928	-0.469079	2	177015044	F	II	HOXD4	TSS1500	island	TSS1500-island	chr2:177014948-177015214	NA	NA
cg04299274	0.312075	0.587248	17.5604	5.17919e-29	7.09066e-27	55.6347	0.43121	0.743285	0.312075	17	25798741	F	II	KSR1	TSS1500	opensea	TSS1500-opensea		NA	NA
cg13567744	0.389012	0.601903	17.5599	5.18955e-29	7.10001e-27	55.6327	0.407397	0.796409	0.389012	7	70790932	R	II	WBSCR17	Body	opensea	Body-opensea		NA	TRUE
cg24461524	0.35285	0.608864	17.5596	5.19429e-29	7.10166e-27	55.6318	0.432439	0.785289	0.35285	19	4207451	R	II	ANKRD24	Body	opensea	Body-opensea		NA	NA
cg11695358	0.306528	0.780177	17.5583	5.21905e-29	7.1331e-27	55.627	0.626913	0.933441	0.306528	8	144797963	R	II	MAPK15	TSS1500	shore	TSS1500-shore	chr8:144798487-144799038	NA	NA
cg09924998	0.25298	0.388674	17.5571	5.24138e-29	7.16118e-27	55.6228	0.262184	0.515163	0.25298	12	122751933	F	II	VPS33A	TSS1500	shore	TSS1500-shore	chr12:122750769-122751228	NA	NA		rs57742919
cg03975694	-0.452942	0.42189	-17.5541	5.29784e-29	7.23342e-27	55.6121	0.648361	0.195419	-0.452942	19	38042472	R	II	ZNF540	5'UTR	shelf	5'UTR-shelf	chr19:38039561-38040395	NA	NA
cg15649236	-0.410338	0.607184	-17.5531	5.31758e-29	7.2579e-27	55.6084	0.812353	0.402014	-0.410338	17	46657504	R	II	MIR10A	TSS200	shore	TSS200-shore	chr17:46658948-46660003	NA	NA
cg27226238	0.381752	0.758261	17.5528	5.32333e-29	7.26328e-27	55.6073	0.567385	0.949137	0.381752	2	79365613	F	II	REG1P	TSS200	opensea	TSS200-opensea		NA	NA
cg15377283	-0.454378	0.484537	-17.5495	5.38773e-29	7.34867e-27	55.5953	0.711726	0.257348	-0.454378	8	55371369	R	II	SOX17	Body	island	Body-island	chr8:55370170-55372525	NA	TRUE
cg07935264	0.345967	0.37245	17.5473	5.43051e-29	7.40368e-27	55.5874	0.199466	0.545433	0.345967	2	113594375	R	II	IL1B	TSS200	opensea	TSS200-opensea		NA	NA
cg03534410	0.337647	0.624359	17.5472	5.43175e-29	7.40368e-27	55.5872	0.455536	0.793182	0.337647	3	12801112	F	II	TMEM40	TSS1500	opensea	TSS1500-opensea		NA	NA
cg08210688	0.169265	0.183764	17.5427	5.52107e-29	7.51779e-27	55.5709	0.0991317	0.268396	0.169265	2	63276723	F	II	OTX1	TSS1500	island	TSS1500-island	chr2:63274475-63279430	NA	TRUE
cg23886101	-0.182226	0.823104	-17.5405	5.56334e-29	7.56808e-27	55.5633	0.914217	0.731991	-0.182226	7	44438216	R	II	NUDCD3	Body	opensea	Body-opensea		NA	TRUE
cg13997788	-0.33539	0.559201	-17.5405	5.56392e-29	7.56808e-27	55.5632	0.726896	0.391506	-0.33539	2	46593223	R	I	EPAS1	Body	opensea	Body-opensea		NA	TRUE
cg01687040	0.411938	0.63521	17.5404	5.56553e-29	7.56808e-27	55.5629	0.429241	0.841179	0.411938	12	55043559	R	II	DCD	TSS1500	opensea	TSS1500-opensea		NA	NA
cg19726128	-0.114834	0.871969	-17.5402	5.5692e-29	7.57052e-27	55.5622	0.929386	0.814552	-0.114834	14	69564942	R	II	DCAF5	Body	opensea	Body-opensea		NA	TRUE
cg04436469	-0.266561	0.481896	-17.5399	5.57567e-29	7.57676e-27	55.5611	0.615177	0.348616	-0.266561	10	134598496	R	II	NKX6-2	Body	island	Body-island	chr10:134597357-134602649	NA	NA
cg14647640	0.23481	0.563204	17.5366	5.64238e-29	7.65965e-27	55.5492	0.445799	0.680609	0.23481	5	1257147	F	I	TERT	Body	island	Body-island	chr5:1256968-1257222	NA	NA		rs36115594
cg20597403	-0.224894	0.758139	-17.5362	5.65118e-29	7.669e-27	55.5477	0.870586	0.645693	-0.224894	7	4305042	F	II	SDK1	Body	island	Body-island	chr7:4303079-4305062	NA	NA
cg17480554	0.395843	0.700901	17.5343	5.68942e-29	7.7183e-27	55.5409	0.50298	0.898823	0.395843	5	52334107	R	II	ITGA2	Body	opensea	Body-opensea		NA	TRUE
cg10682299	-0.497608	0.409049	-17.5338	5.70053e-29	7.73075e-27	55.539	0.657853	0.160245	-0.497608	4	111550154	R	II	PITX2	Body	island	Body-island	chr4:111549879-111550203	NA	TRUE
cg14302973	0.322466	0.750009	17.5334	5.70776e-29	7.73796e-27	55.5377	0.588776	0.911242	0.322466	8	10283221	R	I	MSRA	Body	opensea	Body-opensea		NA	TRUE
cg27006721	0.256717	0.44314	17.5332	5.71218e-29	7.74134e-27	55.5369	0.314782	0.571499	0.256717	10	49760566	F	II	ARHGAP22	Body	opensea	Body-opensea		NA	TRUE
cg27606396	0.387702	0.451534	17.529	5.79983e-29	7.85219e-27	55.5218	0.257683	0.645385	0.387702	2	113542117	R	II	IL1A	1stExon	opensea	1stExon-opensea		NA	TRUE
cg11854007	0.233698	0.245165	17.5285	5.80889e-29	7.86181e-27	55.5202	0.128316	0.362014	0.233698	20	31781697	R	II	BASE	Body	opensea	Body-opensea		NA	NA
cg14631438	0.364497	0.715044	17.5276	5.82799e-29	7.88502e-27	55.5169	0.532795	0.897292	0.364497	11	128732986	F	II	KCNJ1	5'UTR	opensea	5'UTR-opensea		NA	TRUE
cg16546442	-0.310253	0.466465	-17.5254	5.87535e-29	7.94375e-27	55.5088	0.621592	0.311339	-0.310253	4	111539907	R	II	PITX2	Body	island	Body-island	chr4:111539906-111540127	NA	TRUE
cg27456468	-0.420206	0.390728	-17.5232	5.92067e-29	8.00233e-27	55.5012	0.600831	0.180625	-0.420206	2	200334001	F	II	FLJ32063	Body	island	Body-island	chr2:200333687-200334172	NA	TRUE
cg22175873	-0.314601	0.528271	-17.5221	5.94596e-29	8.03381e-27	55.4969	0.685571	0.37097	-0.314601	5	140801482	R	II	PCDHGA4	Body	shore	Body-shore	chr5:140802399-140802832	TRUE	NA
cg11391201	-0.38813	0.394603	-17.521	5.9676e-29	8.06035e-27	55.4933	0.588668	0.200538	-0.38813	11	44333070	R	II	ALX4	TSS1500	shore	TSS1500-shore	chr11:44330542-44331761	TRUE	NA
cg24627900	0.362353	0.572071	17.5197	5.99687e-29	8.09717e-27	55.4884	0.390895	0.753248	0.362353	8	133573739	F	II	HPYR1	TSS200	opensea	TSS200-opensea		NA	NA
cg23049458	-0.38579	0.281736	-17.5144	6.11178e-29	8.23849e-27	55.4695	0.474631	0.0888407	-0.38579	1	62660624	R	I	L1TD1	5'UTR	island	5'UTR-island	chr1:62660555-62660946	NA	NA
cg20366110	0.402025	0.532925	17.5142	6.11597e-29	8.24139e-27	55.4688	0.331912	0.733937	0.402025	8	124720897	F	II	ANXA13	Body	opensea	Body-opensea		TRUE	TRUE
cg20639948	0.141978	0.139342	17.5141	6.11853e-29	8.24207e-27	55.4684	0.0683529	0.210331	0.141978	8	82645116	F	II	CHMP4C	Body	shore	Body-shore	chr8:82644603-82644849	TRUE	NA
cg20921890	-0.241148	0.736077	-17.5123	6.15897e-29	8.29377e-27	55.4618	0.856651	0.615503	-0.241148	18	19753208	R	II	GATA6	Body	shore	Body-shore	chr18:19744936-19752363	NA	NA
cg20817131	-0.378736	0.623005	-17.5102	6.20562e-29	8.35379e-27	55.4543	0.812373	0.433637	-0.378736	7	27184167	R	II	HOXA5	TSS1500	island	TSS1500-island	chr7:27182613-27185562	NA	NA
cg01311955	0.384651	0.68427	17.507	6.27824e-29	8.4459e-27	55.4426	0.491944	0.876596	0.384651	11	132965250	F	II	OPCML	Body	opensea	Body-opensea		NA	TRUE		rs12365292
cg15209808	-0.391008	0.493141	-17.5049	6.3251e-29	8.50326e-27	55.4352	0.688645	0.297637	-0.391008	22	30476254	R	I	HORMAD2	TSS200	island	TSS200-island	chr22:30476012-30476530	NA	NA
cg22712403	0.202921	0.633855	17.5009	6.41609e-29	8.61407e-27	55.421	0.532395	0.735316	0.202921	11	65384321	F	II	PCNXL3	Body	shore	Body-shore	chr11:65382824-65383857	NA	NA
cg23105419	-0.279629	0.692748	-17.4992	6.45506e-29	8.6635e-27	55.4149	0.832563	0.552933	-0.279629	2	43496213	F	II	THADA	Body	opensea	Body-opensea		TRUE	TRUE			rs60554059
cg17803175	-0.340436	0.505546	-17.499	6.45998e-29	8.6672e-27	55.4142	0.675764	0.335328	-0.340436	5	95769071	F	II	PCSK1	TSS200	island	TSS200-island	chr5:95768874-95769080	NA	NA		rs2242385
cg02660277	0.418927	0.611735	17.4976	6.49291e-29	8.70849e-27	55.4091	0.402271	0.821198	0.418927	7	157438616	F	II	PTPRN2	Body	shore	Body-shore	chr7:157440024-157442721	NA	NA
cg18148375	0.344201	0.598291	17.4973	6.50135e-29	8.7169e-27	55.4078	0.426191	0.770392	0.344201	2	1926535	R	I	MYT1L	Body	opensea	Body-opensea		NA	NA
cg14143580	0.414334	0.655557	17.4971	6.50516e-29	8.71911e-27	55.4072	0.44839	0.862724	0.414334	20	29960982	R	II	DEFB118	3'UTR	opensea	3'UTR-opensea		NA	NA
cg26034341	-0.20654	0.833623	-17.4952	6.54875e-29	8.77168e-27	55.4005	0.936893	0.730354	-0.20654	17	477314	F	II	VPS53	Body	opensea	Body-opensea		NA	TRUE
cg08537847	-0.205485	0.67759	-17.4938	6.58258e-29	8.81113e-27	55.3954	0.780333	0.574848	-0.205485	5	148810203	R	I	MIR145	TSS200	opensea	TSS200-opensea		TRUE	TRUE
cg06422471	-0.3729	0.507225	-17.4935	6.58988e-29	8.81521e-27	55.3943	0.693675	0.320775	-0.3729	22	51169500	F	I	SHANK3	Body	island	Body-island	chr22:51169027-51170019	NA	NA
cg08688659	-0.20128	0.801324	-17.4935	6.59001e-29	8.81521e-27	55.3943	0.901964	0.700684	-0.20128	11	35249965	F	II	CD44	Body	opensea	Body-opensea		NA	TRUE
cg26140120	-0.214027	0.750335	-17.4927	6.60843e-29	8.83691e-27	55.3915	0.857349	0.643322	-0.214027	8	124219575	F	II	FAM83A	Body	island	Body-island	chr8:124219411-124219809	NA	NA
cg17530002	0.355503	0.741952	17.4912	6.64512e-29	8.88007e-27	55.386	0.564201	0.919704	0.355503	7	157701262	R	I	PTPRN2	Body	shore	Body-shore	chr7:157702996-157703285	NA	NA
cg26673195	0.346294	0.490106	17.4907	6.65607e-29	8.89176e-27	55.3843	0.316959	0.663253	0.346294	17	41052729	R	II	G6PC	TSS200	opensea	TSS200-opensea		NA	NA
cg00162064	0.272517	0.287152	17.49	6.67406e-29	8.91283e-27	55.3816	0.150894	0.423411	0.272517	1	44998151	F	II	RNF220	Body	opensea	Body-opensea		NA	TRUE
cg17518550	0.28019	0.254672	17.4877	6.72971e-29	8.97524e-27	55.3733	0.114578	0.394767	0.28019	1	247712383	R	I	C1orf150	TSS200	opensea	TSS200-opensea		NA	NA
cg07895132	-0.359268	0.486979	-17.4876	6.73265e-29	8.97617e-27	55.3729	0.666613	0.307345	-0.359268	17	33825172	R	I	SLFN12L	Body	opensea	Body-opensea		NA	NA
cg22991506	0.294576	0.471392	17.4832	6.83858e-29	9.10834e-27	55.3573	0.324104	0.61868	0.294576	14	50468241	F	II	C14orf182	Body	shore	Body-shore	chr14:50470015-50470419	TRUE	TRUE
cg03900143	-0.51847	0.372508	-17.4831	6.84184e-29	9.10968e-27	55.3569	0.631743	0.113273	-0.51847	3	147111660	F	I	ZIC4	Body	island	Body-island	chr3:147108511-147111703	TRUE	NA		rs16859414
cg00629625	0.341658	0.642218	17.4811	6.89197e-29	9.17035e-27	55.3496	0.471389	0.813047	0.341658	20	44663630	F	II	SLC12A5	Body	shelf	Body-shelf	chr20:44660342-44660948	NA	NA
cg22791045	0.339465	0.746304	17.4802	6.91423e-29	9.19389e-27	55.3463	0.576572	0.916037	0.339465	11	133403793	R	II	OPCML	TSS1500	opensea	TSS1500-opensea		NA	NA
cg10109215	0.212034	0.270699	17.4787	6.95121e-29	9.24001e-27	55.341	0.164682	0.376716	0.212034	20	30605810	F	II	C20orf160	Body	island	Body-island	chr20:30605744-30605970	TRUE	NA
cg14288326	-0.351069	0.423753	-17.4768	6.99779e-29	9.29886e-27	55.3344	0.599287	0.248218	-0.351069	7	77042644	R	II	PION	Body	shelf	Body-shelf	chr7:77044840-77045719	NA	TRUE
cg26826183	0.337424	0.583925	17.4765	7.00736e-29	9.3085e-27	55.333	0.415213	0.752637	0.337424	19	10231701	R	II	EIF3G	TSS1500	shore	TSS1500-shore	chr19:10230162-10230682	TRUE	NA
cg11375053	-0.131398	0.872571	-17.4762	7.01447e-29	9.31486e-27	55.332	0.93827	0.806872	-0.131398	11	6702453	R	II	MRPL17	3'UTR	shore	3'UTR-shore	chr11:6704296-6704943	NA	NA
cg04604142	0.419643	0.629656	17.4751	7.04228e-29	9.34563e-27	55.328	0.419834	0.839478	0.419643	17	48796515	R	II	LUC7L3	TSS1500	shore	TSS1500-shore	chr17:48796750-48797317	NA	NA
cg18594963	-0.144778	0.819876	-17.4745	7.05747e-29	9.3627e-27	55.3259	0.892266	0.747487	-0.144778	17	1375253	F	II	MYO1C	Body	island	Body-island	chr17:1375216-1375460	NA	NA		rs11538158
cg07236912	-0.171316	0.823825	-17.4744	7.06033e-29	9.36341e-27	55.3255	0.909483	0.738167	-0.171316	4	95429383	F	II	PDLIM5	Body	opensea	Body-opensea		NA	TRUE
cg10453343	-0.155584	0.748257	-17.472	7.12108e-29	9.44087e-27	55.3169	0.826049	0.670464	-0.155584	1	161049655	F	II	PVRL4	Body	island	Body-island	chr1:161049346-161049737	NA	NA			rs3737786
cg27255115	-0.138079	0.872464	-17.4693	7.18989e-29	9.52894e-27	55.3073	0.941503	0.803424	-0.138079	17	38603555	F	II	IGFBP4	Body	shelf	Body-shelf	chr17:38599669-38600306	NA	NA
cg24027320	0.278874	0.245482	17.4685	7.21178e-29	9.55481e-27	55.3043	0.106045	0.38492	0.278874	20	13620031	F	II	TASP1	TSS1500	shore	TSS1500-shore	chr20:13619285-13619770	NA	NA
cg09877744	-0.305625	0.455652	-17.4663	7.26995e-29	9.62871e-27	55.2963	0.608465	0.302839	-0.305625	22	51042356	F	I	MAPK8IP2	Body	island	Body-island	chr22:51042293-51043422	NA	NA		rs35944996
cg23618344	-0.510013	0.327691	-17.4658	7.28135e-29	9.63589e-27	55.2947	0.582697	0.0726845	-0.510013	12	54423428	R	II	HOXC4	5'UTR	island	5'UTR-island	chr12:54423427-54423712	NA	NA
cg06023994	-0.328584	0.650834	-17.4658	7.28255e-29	9.63589e-27	55.2946	0.815125	0.486542	-0.328584	3	170137871	F	II	CLDN11	Body	island	Body-island	chr3:170136242-170137886	TRUE	NA
cg27170268	-0.413684	0.521559	-17.4646	7.3142e-29	9.67458e-27	55.2902	0.728401	0.314717	-0.413684	14	104171695	R	I	XRCC3	Body	opensea	Body-opensea		NA	NA
cg18699439	-0.12884	0.829735	-17.4645	7.31669e-29	9.6747e-27	55.2899	0.894156	0.765315	-0.12884	19	40928820	R	II	SERTAD1	Body	shore	Body-shore	chr19:40926640-40927368	NA	NA
cg19972648	0.376054	0.591216	17.464	7.32881e-29	9.68754e-27	55.2882	0.403189	0.779243	0.376054	10	79110632	R	II	KCNMA1	Body	opensea	Body-opensea		TRUE	TRUE
cg04456892	0.29177	0.745693	17.4615	7.39512e-29	9.77198e-27	55.2792	0.599808	0.891578	0.29177	11	6898245	R	II	OR10A4	1stExon	opensea	1stExon-opensea		NA	NA
cg07429284	-0.261043	0.568549	-17.46	7.43616e-29	9.82298e-27	55.2737	0.699071	0.438028	-0.261043	5	132107420	R	II	2019-09-08	Body	opensea	Body-opensea		TRUE	TRUE
cg05516272	-0.243182	0.563952	-17.4592	7.45744e-29	9.84785e-27	55.2709	0.685544	0.442361	-0.243182	11	66311334	R	I	ZDHHC24	Body	shore	Body-shore	chr11:66313169-66313822	NA	NA
cg04917446	-0.347959	0.40896	-17.4582	7.48439e-29	9.8802e-27	55.2673	0.582939	0.23498	-0.347959	17	46699073	R	I	HOXB9	3'UTR	island	3'UTR-island	chr17:46698880-46699083	NA	NA
cg24262469	0.232095	0.224317	17.4578	7.49505e-29	9.89103e-27	55.2658	0.108269	0.340364	0.232095	3	156391694	F	II	TIPARP	TSS1500	shore	TSS1500-shore	chr3:156391811-156393607	NA	NA
cg19911880	-0.15971	0.841981	-17.4569	7.52041e-29	9.92124e-27	55.2625	0.921836	0.762126	-0.15971	8	131353969	R	II	ASAP1	Body	opensea	Body-opensea		NA	TRUE
cg21534578	0.286144	0.440221	17.4563	7.53557e-29	9.93799e-27	55.2605	0.297149	0.583293	0.286144	1	197745159	R	II	DENND1B	TSS1500	shore	TSS1500-shore	chr1:197743931-197744788	NA	TRUE
cg27261597	0.437474	0.647111	17.456	7.54507e-29	9.9445e-27	55.2592	0.428374	0.865848	0.437474	1	209604378	R	II	LOC642587	Body	opensea	Body-opensea		NA	NA
cg17276002	0.197486	0.156504	17.4559	7.54545e-29	9.9445e-27	55.2592	0.0577606	0.255247	0.197486	10	75172806	R	I	ANXA7	5'UTR	shore	5'UTR-shore	chr10:75173411-75173950	NA	NA
cg06382559	-0.330191	0.282002	-17.4545	7.58377e-29	9.98845e-27	55.2541	0.447097	0.116907	-0.330191	10	102896640	R	I	TLX1	Body	island	Body-island	chr10:102896342-102896665	NA	NA
cg00574563	-0.47015	0.377855	-17.4513	7.67317e-29	1.00996e-26	55.2424	0.61293	0.14278	-0.47015	17	35299270	F	II	LHX1	Body	island	Body-island	chr17:35291899-35300875	NA	NA		rs8078990
cg25630588	-0.172374	0.853473	-17.447	7.79348e-29	1.02546e-26	55.2269	0.93966	0.767286	-0.172374	3	50357322	F	II	HYAL2	Body	shore	Body-shore	chr3:50357453-50357683	NA	TRUE			rs78532114
cg00808170	-0.194506	0.708827	-17.4467	7.80271e-29	1.02634e-26	55.2257	0.80608	0.611574	-0.194506	5	140807787	F	II	PCDHGA4	Body	island	Body-island	chr5:140807339-140807788	NA	NA
cg13197551	-0.138255	0.87058	-17.4461	7.81706e-29	1.02789e-26	55.2239	0.939708	0.801452	-0.138255	20	60709957	R	II	LSM14B	3'UTR	opensea	3'UTR-opensea		NA	TRUE
cg04995095	0.422411	0.66918	17.444	7.87683e-29	1.03507e-26	55.2163	0.457974	0.880385	0.422411	17	72619556	R	II	CD300E	Body	opensea	Body-opensea		NA	NA
cg16888658	0.424196	0.458096	17.4403	7.98369e-29	1.04775e-26	55.2028	0.245998	0.670194	0.424196	2	25142117	F	II	ADCY3	TSS200	shore	TSS200-shore	chr2:25142472-25143689	NA	NA
cg19801120	-0.244595	0.724922	-17.4402	7.98747e-29	1.0479e-26	55.2023	0.847219	0.602624	-0.244595	6	53530570	R	II	KLHL31	TSS200	opensea	TSS200-opensea		NA	NA
cg06833110	-0.468836	0.410309	-17.4378	8.05606e-29	1.05621e-26	55.1938	0.644727	0.17589	-0.468836	2	66673316	R	I	MEIS1	Body	island	Body-island	chr2:66672431-66673636	NA	NA
cg14555736	0.393158	0.644658	17.4374	8.06827e-29	1.05747e-26	55.1923	0.448079	0.841238	0.393158	12	128852982	R	II	TMEM132C	Body	shelf	Body-shelf	chr12:128850549-128850755	NA	NA
cg13492692	-0.356239	0.264004	-17.4356	8.11943e-29	1.06382e-26	55.186	0.442124	0.085885	-0.356239	9	126777673	F	I	LHX2	Body	island	Body-island	chr9:126773246-126780953	NA	NA
cg02986451	0.319608	0.609224	17.4347	8.14802e-29	1.06722e-26	55.1825	0.44942	0.769028	0.319608	18	59159403	R	II	CDH20	Body	opensea	Body-opensea		NA	NA
cg03368099	-0.309997	0.383959	-17.4343	8.15919e-29	1.06834e-26	55.1811	0.538957	0.22896	-0.309997	7	27184521	R	I	HOXA5	TSS1500	island	TSS1500-island	chr7:27182613-27185562	NA	NA
cg27431877	-0.1668	0.81911	-17.4341	8.16495e-29	1.06874e-26	55.1804	0.90251	0.73571	-0.1668	12	124911924	F	II	NCOR2	Body	shore	Body-shore	chr12:124911243-124911464	TRUE	NA
cg01518889	-0.516871	0.354984	-17.4273	8.36647e-29	1.09349e-26	55.1561	0.61342	0.0965489	-0.516871	3	128202493	R	I	GATA2	Body	shelf	Body-shelf	chr3:128205495-128212274	NA	NA			rs55665236
cg09837656	-0.268993	0.620751	-17.4228	8.50561e-29	1.11117e-26	55.1396	0.755248	0.486255	-0.268993	15	65149245	F	II	PLEKHO2	Body	opensea	Body-opensea		NA	TRUE
cg16080125	-0.201126	0.595645	-17.4213	8.54975e-29	1.11621e-26	55.1344	0.696208	0.495082	-0.201126	7	2774654	R	I	GNA12	Body	island	Body-island	chr7:2774444-2774655	NA	NA
cg10403394	-0.280238	0.640428	-17.4212	8.55507e-29	1.11654e-26	55.1338	0.780548	0.500309	-0.280238	15	63349192	R	II	TPM1	Body	opensea	Body-opensea		NA	NA	low-CpG:61136237-61136371
cg21784383	-0.464059	0.416736	-17.4197	8.60178e-29	1.12227e-26	55.1284	0.648766	0.184707	-0.464059	1	217311172	F	II	ESRRG	TSS200	island	TSS200-island	chr1:217310749-217311178	NA	NA
cg25843346	0.190022	0.237723	17.4158	8.72383e-29	1.13716e-26	55.1143	0.142712	0.332734	0.190022	6	31762555	R	II	VARS	Body	shore	Body-shore	chr6:31763240-31763905	NA	NA
cg00454770	0.333368	0.304141	17.4157	8.72439e-29	1.13716e-26	55.1143	0.137457	0.470825	0.333368	10	116286974	F	II	ABLIM1	Body	opensea	Body-opensea		TRUE	TRUE
cg02196651	0.292523	0.234311	17.4132	8.80607e-29	1.14744e-26	55.105	0.0880498	0.380573	0.292523	4	54457842	F	II	LNX1	TSS200	opensea	TSS200-opensea		NA	TRUE		rs7691817
cg03547062	0.336609	0.6404	17.4129	8.81466e-29	1.14819e-26	55.104	0.472096	0.808705	0.336609	11	393606	R	I	PKP3	TSS1500	shore	TSS1500-shore	chr11:394257-394619	NA	TRUE
cg21684179	0.321198	0.615254	17.4114	8.8627e-29	1.1537e-26	55.0986	0.454655	0.775853	0.321198	1	110576933	R	II	FAM40A	TSS1500	shore	TSS1500-shore	chr1:110577199-110577942	NA	NA
cg01921323	0.265079	0.502428	17.4094	8.92516e-29	1.16033e-26	55.0916	0.369888	0.634967	0.265079	7	153881192	F	II	DPP6	Body	opensea	Body-opensea		NA	TRUE
cg00855990	-0.412131	0.447128	-17.4083	8.9622e-29	1.16401e-26	55.0874	0.653194	0.241063	-0.412131	1	18959354	F	II	PAX7	Body	island	Body-island	chr1:18956895-18959829	NA	NA
cg22344727	-0.385749	0.428134	-17.408	8.97147e-29	1.16484e-26	55.0864	0.621009	0.23526	-0.385749	12	81102035	R	II	MYF6	Body	island	Body-island	chr12:81102034-81102716	NA	NA
cg04461228	-0.325371	0.413003	-17.4076	8.98405e-29	1.16572e-26	55.085	0.575688	0.250318	-0.325371	5	92906678	R	II	FLJ42709	Body	island	Body-island	chr5:92906239-92908875	NA	NA
cg14042889	-0.356984	0.671906	-17.4072	8.99702e-29	1.16703e-26	55.0835	0.850398	0.493414	-0.356984	7	27169208	R	II	HOXA4	Body	shore	Body-shore	chr7:27169572-27170638	NA	NA			rs41303381
cg13502686	-0.264056	0.774819	-17.3982	9.29505e-29	1.2053e-26	55.051	0.906847	0.642791	-0.264056	7	105389254	R	II	ATXN7L1	Body	opensea	Body-opensea		NA	TRUE
cg25406518	0.29467	0.614637	17.3969	9.34042e-29	1.2104e-26	55.0462	0.467302	0.761971	0.29467	11	61102165	F	II	DAK	5'UTR	shore	5'UTR-shore	chr11:61100073-61100972	NA	NA
cg03981954	-0.43551	0.306659	-17.3963	9.35885e-29	1.2124e-26	55.0442	0.524414	0.0889044	-0.43551	7	121942010	R	I	FEZF1	3'UTR	shore	3'UTR-shore	chr7:121943867-121944538	NA	NA
cg05241355	-0.437553	0.320939	-17.3946	9.41728e-29	1.21958e-26	55.038	0.539716	0.102162	-0.437553	14	57278351	R	I	OTX2	TSS1500	shore	TSS1500-shore	chr14:57278709-57279116	NA	NA
cg04261138	-0.412709	0.346646	-17.3921	9.501e-29	1.22884e-26	55.0292	0.553	0.140291	-0.412709	5	87968636	R	II	LOC645323	Body	island	Body-island	chr5:87968635-87968907	NA	NA
cg14217091	0.359648	0.515971	17.3916	9.51915e-29	1.23079e-26	55.0272	0.336147	0.695795	0.359648	14	103285756	R	II	TRAF3	5'UTR	opensea	5'UTR-opensea		NA	TRUE
cg04820159	-0.358484	0.702013	-17.3914	9.5249e-29	1.23114e-26	55.0266	0.881255	0.522772	-0.358484	14	105251188	F	II	AKT1	Body	shore	Body-shore	chr14:105251401-105251617	NA	TRUE			rs2494742
cg00955780	-0.15784	0.827717	-17.3907	9.55103e-29	1.23412e-26	55.0239	0.906637	0.748798	-0.15784	12	8025861	R	II	SLC2A14	TSS1500	island	TSS1500-island	chr12:8025364-8025908	NA	NA
cg01942790	-0.202249	0.841283	-17.3893	9.5999e-29	1.24003e-26	55.0188	0.942408	0.740159	-0.202249	4	1211419	R	I	CTBP1	Body	shore	Body-shore	chr4:1209765-1210193	NA	NA
cg21425842	-0.511554	0.322091	-17.3891	9.60692e-29	1.24054e-26	55.0181	0.577868	0.066314	-0.511554	6	26240939	R	II	HIST1H4F	1stExon	island	1stExon-island	chr6:26240697-26240951	NA	NA
cg26465391	-0.431309	0.460162	-17.3867	9.69073e-29	1.25056e-26	55.0094	0.675817	0.244507	-0.431309	19	58220773	F	II	ZNF154	TSS200	shore	TSS200-shore	chr19:58220189-58220517	TRUE	NA
cg26938314	0.32041	0.664053	17.386	9.71364e-29	1.25312e-26	55.0071	0.503848	0.824258	0.32041	12	131541938	F	II	GPR133	Body	opensea	Body-opensea		NA	NA		rs55968285
cg03234186	-0.536852	0.377912	-17.3837	9.79681e-29	1.26296e-26	54.9986	0.646338	0.109485	-0.536852	19	58220657	F	II	ZNF154	TSS200	shore	TSS200-shore	chr19:58220189-58220517	TRUE	NA
[truncated: 146,306 more rows]
